# Supplementary material
Source: PubMed Central journal article supplement (PMC4836215)
Supplement: MCB.01068-15_zmb999101207so1.pdf [file MCB.01068-15_zmb999101207so1.pdf]

**Supplemental Table 1: Transcripts up-regulated in spleens from Triple KO mice compared to spleens from WT mice**

Shown are a total of 2023 transcripts that were up-regulated in Triple KO mice spleens as compared to WT spleens in the RNA-Seq dataset. GeneChrom refers to the gene symbol, with a chromosome suffix to make gene entries unique. Columns B through E (eg. WT\_v1) represent each sample group FPKM value, i.e., sequence read fragments per kilobase per million mapped reads, where pair-end reads are counted as one fragment. FloorLog2FC represents log2 fold change after applying a noise floor, which resolves infinite fold changes produced by cuffdiff. Fold Change represents the fold change over the respective WT samples. The p value is derived from the Cuffdiff statistical t test with negative binomial distribution, and the q value represents the FDR adjusted p value.

| GeneChrom           | WT_v1 | DoubleKO | WT_v2 | TripleKO | floorLog2FC<br>DoubleKO vsWT | Fold Change<br>DoubleKO vs WT | floorLog2FC<br>TripleKO vsWT | Fold Change<br>TripleKO vs WT | p_value<br>DoubleKO vsWT | p_value<br>TripleKO<br>vsWT | q_value<br>DoubleKO vsWT | q_value<br>TripleKO<br>vsWT |
|---------------------|-------|----------|-------|----------|------------------------------|-------------------------------|------------------------------|-------------------------------|--------------------------|-----------------------------|--------------------------|-----------------------------|
| 1190002F15Rik_chr6  | 3     | 2        | 1     | 11       | -0.3                         | 1.2                           | 3.2                          | 9.4                           | 6.23E-01                 | 5.00E-05                    | 1.00E+00                 | 2.82E-04                    |
| 1300017J02Rik_chr9  | 0     | 0        | 1     | 21       | 0.0                          | 1.0                           | 4.4                          | 21.0                          | 8.15E-01                 | 5.00E-05                    | 1.00E+00                 | 2.85E-04                    |
| 1700001L05Rik_chr15 | 1     | 1        | 1     | 4        | 0.0                          | 1.0                           | 1.6                          | 3.0                           | 9.92E-01                 | 5.00E-05                    | 1.00E+00                 | 2.82E-04                    |
| 1700020L24Rik_chr11 | 1     | 1        | 1     | 2        | 0.0                          | 1.0                           | 1.1                          | 2.1                           | 9.70E-01                 | 3.00E-04                    | 1.00E+00                 | 1.47E-03                    |
| 1810011H11Rik_chr14 | 3     | 4        | 4     | 7        | 0.1                          | 1.1                           | 0.9                          | 1.9                           | 7.14E-01                 | 5.00E-05                    | 1.00E+00                 | 2.85E-04                    |
| 2810417H13Rik_chr9  | 6     | 8        | 7     | 33       | 0.4                          | 1.3                           | 2.2                          | 4.8                           | 3.46E-01                 | 5.00E-05                    | 9.98E-01                 | 2.85E-04                    |
| 4930579G24Rik_chr3  | 1     | 2        | 2     | 6        | 0.2                          | 1.2                           | 1.4                          | 2.6                           | 6.15E-01                 | 5.00E-05                    | 1.00E+00                 | 2.85E-04                    |
| 5730508B09Rik_chr3  | 5     | 5        | 5     | 20       | 0.0                          | 1.0                           | 2.0                          | 4.0                           | 9.09E-01                 | 5.00E-05                    | 1.00E+00                 | 2.85E-04                    |
| 6030468B19Rik_chr11 | 1     | 1        | 1     | 3        | 0.0                          | 1.0                           | 1.7                          | 3.3                           | 8.71E-01                 | 5.00E-05                    | 1.00E+00                 | 2.85E-04                    |
| A530064D06Rik_chr17 | 1     | 1        | 1     | 4        | 0.0                          | 1.0                           | 1.4                          | 2.7                           | 8.77E-01                 | 5.00E-05                    | 1.00E+00                 | 2.85E-04                    |
| AA467197_chr2       | 0     | 0        | 0     | 2        | 0.0                          | 1.0                           | 1.1                          | 2.2                           | 3.95E-01                 | 3.40E-02                    | 1.00E+00                 | 8.68E-02                    |
| Aars_chr8           | 8     | 12       | 18    | 34       | 0.6                          | 1.5                           | 1.0                          | 2.0                           | 1.34E-02                 | 5.00E-05                    | 5.29E-01                 | 2.85E-04                    |
| Aatk_chr11          | 1     | 2        | 4     | 6        | 0.1                          | 1.1                           | 0.7                          | 1.7                           | 7.09E-01                 | 6.25E-05                    | 1.00E+00                 | 3.41E-04                    |
| Abcb10_chr8         | 6     | 7        | 12    | 90       | 0.4                          | 1.3                           | 2.9                          | 7.5                           | 1.10E-01                 | 5.00E-05                    | 9.38E-01                 | 2.85E-04                    |
| Abcb4_chr5          | 4     | 4        | 8     | 38       | 0.0                          | 1.0                           | 2.2                          | 4.8                           | 9.71E-01                 | 5.00E-05                    | 1.00E+00                 | 2.85E-04                    |
| Abcb6_chr1          | 2     | 2        | 4     | 19       | 0.4                          | 1.3                           | 2.3                          | 5.1                           | 2.48E-01                 | 5.00E-05                    | 9.92E-01                 | 2.85E-04                    |
| Abcg2_chr6          | 5     | 6        | 8     | 25       | 0.1                          | 1.1                           | 1.7                          | 3.2                           | 7.81E-01                 | 5.00E-05                    | 1.00E+00                 | 2.85E-04                    |
| Abcg4_chr9          | 0     | 0        | 0     | 17       | 0.0                          | 1.0                           | 4.1                          | 17.0                          | 5.73E-01                 | 5.00E-05                    | 1.00E+00                 | 2.85E-04                    |
| Abhd5_chr9          | 4     | 4        | 5     | 12       | -0.1                         | 1.0                           | 1.2                          | 2.2                           | 8.24E-01                 | 5.00E-05                    | 1.00E+00                 | 2.85E-04                    |
| Ache_chr5           | 1     | 2        | 3     | 25       | 0.4                          | 1.3                           | 3.1                          | 8.6                           | 3.33E-01                 | 5.00E-05                    | 9.98E-01                 | 2.85E-04                    |
| Ackr1_chr1          | 0     | 1        | 1     | 8        | 0.0                          | 1.0                           | 2.9                          | 7.5                           | 1.14E-01                 | 5.00E-05                    | 9.43E-01                 | 2.85E-04                    |
| Acmsd_chr1          | 0     | 0        | 0     | 4        | 0.0                          | 1.0                           | 1.9                          | 3.8                           | 5.69E-01                 | 5.00E-05                    | 1.00E+00                 | 2.85E-04                    |
| Acp1_chr12          | 4     | 4        | 4     | 21       | 0.1                          | 1.1                           | 2.2                          | 4.5                           | 6.93E-01                 | 5.00E-05                    | 1.00E+00                 | 2.92E-04                    |
| Acs1_chr8           | 6     | 8        | 14    | 41       | 0.4                          | 1.3                           | 1.6                          | 3.0                           | 1.09E-01                 | 5.00E-05                    | 9.38E-01                 | 2.85E-04                    |
| Acs16_chr11         | 0     | 0        | 0     | 2        | 0.0                          | 1.0                           | 0.9                          | 1.9                           | 7.58E-01                 | 5.00E-05                    | 1.00E+00                 | 2.49E-04                    |
| Ada_chr2            | 3     | 4        | 5     | 9        | 0.1                          | 1.1                           | 0.9                          | 1.9                           | 7.77E-01                 | 5.00E-05                    | 1.00E+00                 | 2.85E-04                    |
| Add2_chr6           | 1     | 1        | 2     | 55       | 0.3                          | 1.2                           | 4.8                          | 27.7                          | 2.69E-01                 | 5.00E-05                    | 9.75E-01                 | 2.85E-04                    |
| Adpgk_chr9          | 13    | 14       | 19    | 40       | 0.1                          | 1.1                           | 1.1                          | 2.1                           | 5.96E-01                 | 5.00E-05                    | 1.00E+00                 | 2.85E-04                    |
| Al607873_chr1       | 4     | 6        | 8     | 29       | 0.5                          | 1.4                           | 1.8                          | 3.5                           | 6.25E-02                 | 5.00E-05                    | 8.76E-01                 | 2.85E-04                    |
| Alad_chr4           | 10    | 7        | 19    | 55       | -0.5                         | 1.4                           | 1.5                          | 2.9                           | 1.29E-01                 | 5.00E-05                    | 9.54E-01                 | 2.85E-04                    |
| Alas2_chrX          | 62    | 103      | 110   | 392      | 0.8                          | 1.7                           | 1.8                          | 3.6                           | 5.14E-02                 | 8.00E-04                    | 5.08E-01                 | 3.37E-03                    |
| Aldh1a1_chr19       | 6     | 9        | 9     | 55       | 0.5                          | 1.4                           | 2.6                          | 5.9                           | 7.69E-02                 | 5.00E-05                    | 9.03E-01                 | 2.85E-04                    |
| Alox5ap_chr5        | 19    | 26       | 28    | 64       | 0.4                          | 1.3                           | 1.2                          | 2.3                           | 1.16E-01                 | 5.00E-05                    | 9.45E-01                 | 2.85E-04                    |
| Ampd3_chr7          | 5     | 6        | 11    | 27       | 0.2                          | 1.2                           | 1.2                          | 2.3                           | 3.14E-01                 | 5.00E-05                    | 9.97E-01                 | 2.85E-04                    |
| Angptl4_chr17       | 3     | 4        | 5     | 9        | 0.4                          | 1.3                           | 0.9                          | 1.8                           | 2.29E-01                 | 5.00E-05                    | 9.91E-01                 | 2.85E-04                    |
| Ankle1_chr8         | 1     | 1        | 1     | 21       | 0.2                          | 1.1                           | 4.0                          | 16.5                          | 3.09E-01                 | 5.00E-05                    | 9.97E-01                 | 2.85E-04                    |
| Ankrd9_chr12        | 0     | 0        | 1     | 3        | 0.0                          | 1.0                           | 1.7                          | 3.2                           | 4.55E-01                 | 5.00E-05                    | 1.00E+00                 | 2.85E-04                    |
| Anxa1_chr19         | 27    | 30       | 29    | 145      | 0.2                          | 1.1                           | 2.3                          | 5.0                           | 4.23E-01                 | 5.00E-05                    | 1.00E+00                 | 2.85E-04                    |
| Anxa2_chr9          | 37    | 45       | 47    | 81       | 0.3                          | 1.2                           | 0.8                          | 1.7                           | 2.01E-01                 | 5.00E-05                    | 9.87E-01                 | 2.85E-04                    |
| Ap3s1_chr18         | 13    | 13       | 13    | 33       | 0.0                          | 1.0                           | 1.3                          | 2.5                           | 9.61E-01                 | 5.00E-05                    | 1.00E+00                 | 2.85E-04                    |
| Apoc1_chr7          | 3     | 5        | 1     | 4        | 0.8                          | 1.7                           | 1.6                          | 2.9                           | 1.49E-01                 | 5.00E-05                    | 9.70E-01                 | 2.85E-04                    |
| Apol10a_chr15       | 0     | 0        | 0     | 22       | 0.0                          | 1.0                           | 4.5                          | 22.3                          | 8.40E-02                 | 1.30E-02                    | 1.00E+00                 | 3.91E-02                    |
| Apol11b_chr15       | 0     | 3        | 0     | 367      | 1.8                          | 3.5                           | 8.5                          | 367.4                         | 6.30E-10                 | 5.00E-05                    | 3.75E-07                 | 2.85E-04                    |
| Apol8_chr15         | 0     | 0        | 0     | 38       | 0.0                          | 1.0                           | 5.2                          | 37.7                          | 1.31E-01                 | 5.00E-05                    | 1.00E+00                 | 2.85E-04                    |
| Apold1_chr6         | 1     | 1        | 1     | 2        | 0.0                          | 1.0                           | 1.2                          | 2.3                           | 4.92E-01                 | 5.00E-05                    | 1.00E+00                 | 2.85E-04                    |
| Aqp1_chr6           | 10    | 10       | 18    | 207      | 0.0                          | 1.0                           | 3.5                          | 11.3                          | 8.46E-01                 | 5.00E-05                    | 1.00E+00                 | 2.85E-04                    |
| Aqp9_chr9           | 1     | 1        | 2     | 8        | 0.2                          | 1.2                           | 2.2                          | 4.6                           | 5.88E-01                 | 5.00E-05                    | 1.00E+00                 | 2.85E-04                    |
| Arhgef37_chr18      | 1     | 0        | 1     | 3        | 0.0                          | 1.0                           | 1.1                          | 2.2                           | 4.60E-01                 | 5.00E-05                    | 1.00E+00                 | 2.85E-04                    |
| Arhgef39_chr4       | 1     | 1        | 1     | 7        | 0.0                          | 1.0                           | 2.3                          | 5.0                           | 9.35E-01                 | 5.00E-05                    | 1.00E+00                 | 2.85E-04                    |
| Arl11_chr14         | 2     | 2        | 2     | 5        | -0.2                         | 1.1                           | 1.5                          | 2.8                           | 6.90E-01                 | 5.00E-05                    | 1.00E+00                 | 2.85E-04                    |
| Art4_chr6           | 2     | 2        | 3     | 10       | -0.1                         | 1.1                           | 1.5                          | 2.9                           | 8.33E-01                 | 5.00E-05                    | 1.00E+00                 | 2.85E-04                    |
| Asf1b_chr8          | 4     | 6        | 7     | 37       | 0.3                          | 1.3                           | 2.5                          | 5.7                           | 3.07E-01                 | 5.00E-05                    | 9.97E-01                 | 2.85E-04                    |
| Asns_chr6           | 2     | 2        | 3     | 28       | 0.3                          | 1.2                           | 3.2                          | 9.0                           | 4.52E-01                 | 5.00E-05                    | 1.00E+00                 | 2.85E-04                    |
| Aspm_chr1           | 1     | 1        | 2     | 16       | 0.0                          | 1.0                           | 3.1                          | 8.3                           | 9.86E-01                 | 5.00E-05                    | 1.00E+00                 | 2.85E-04                    |
| Asprv1_chr6         | 2     | 2        | 2     | 7        | 0.2                          | 1.2                           | 1.9                          | 3.7                           | 6.13E-01                 | 5.00E-05                    | 1.00E+00                 | 2.85E-04                    |
| Atad5_chr11         | 2     | 2        | 4     | 12       | 0.0                          | 1.0                           | 1.7                          | 3.2                           | 8.63E-01                 | 5.00E-05                    | 1.00E+00                 | 2.85E-04                    |
| Atp2b4_chr1         | 6     | 6        | 14    | 48       | 0.0                          | 1.0                           | 1.7                          | 3.3                           | 9.43E-01                 | 5.00E-05                    | 1.00E+00                 | 2.85E-04                    |
| Atp7b_chr8          | 0     | 0        | 1     | 6        | 0.0                          | 1.0                           | 2.7                          | 6.5                           | 9.82E-01                 | 5.00E-05                    | 1.00E+00                 | 2.85E-04                    |
| Atp8b4_chr2         | 3     | 3        | 5     | 12       | 0.2                          | 1.2                           | 1.2                          | 2.2                           | 4.44E-01                 | 5.00E-05                    | 1.00E+00                 | 2.85E-04                    |
| Atpif1_chr4         | 37    | 37       | 27    | 128      | 0.0                          | 1.0                           | 2.2                          | 4.7                           | 9.75E-01                 | 5.00E-05                    | 1.00E+00                 | 2.85E-04                    |
| Aurka_chr2          | 2     | 3        | 3     | 22       | 0.7                          | 1.7                           | 2.8                          | 7.2                           | 7.58E-02                 | 5.00E-05                    | 9.02E-01                 | 2.85E-04                    |
| Aurkb_chr11         | 3     | 3        | 5     | 27       | 0.3                          | 1.2                           | 2.5                          | 5.5                           | 4.86E-01                 | 5.00E-05                    | 1.00E+00                 | 2.85E-04                    |
| B430306N03Rik_chr17 | 5     | 5        | 9     | 17       | 0.0                          | 1.0                           | 0.9                          | 1.9                           | 9.71E-01                 | 5.00E-05                    | 1.00E+00                 | 2.85E-04                    |
| B4galt6_chr18       | 2     | 2        | 3     | 8        | 0.4                          | 1.3                           | 1.3                          | 2.4                           | 2.23E-01                 | 5.00E-05                    | 9.91E-01                 | 2.85E-04                    |
| Bag2_chr1           | 1     | 1        | 2     | 7        | 0.1                          | 1.0                           | 2.0                          | 4.1                           | 9.12E-01                 | 5.00E-05                    | 1.00E+00                 | 2.85E-04                    |
| Bard1_chr1          | 1     | 1        | 2     | 8        | 0.1                          | 1.1                           | 2.2                          | 4.7                           | 8.41E-01                 | 5.00E-05                    | 1.00E+00                 | 2.85E-04                    |
| BC030867_chr11      | 0     | 0        | 1     | 3        | 0.0                          | 1.0                           | 1.5                          | 2.8                           | 5.08E-01                 | 5.00E-05                    | 1.00E+00                 | 2.85E-04                    |
| Bcl2l1_chr2         | 4     | 7        | 8     | 38       | 0.7                          | 1.6                           | 2.2                          | 4.7                           | 1.66E-02                 | 5.00E-05                    | 5.86E-01                 | 2.85E-04                    |
| Bex4_chrX           | 0     | 1        | 0     | 4        | 0.0                          | 1.0                           | 1.9                          | 3.7                           | 7.63E-01                 | 5.00E-05                    | 1.00E+00                 | 2.85E-04                    |
| Bhlha15_chr5        | 1     | 1        | 2     | 5        | 0.4                          | 1.3                           | 1.3                          | 2.5                           | 2.99E-01                 | 5.00E-05                    | 9.96E-01                 | 2.85E-04                    |
| Birc5_chr11         | 4     | 5        | 3     | 33       | 0.5                          | 1.4                           | 3.7                          | 13.0                          | 2.84E-01                 | 5.00E-05                    | 9.97E-01                 | 2.92E-04                    |

|                     |     |     |     |     |      |     |     |       |          |          |          |          |
|---------------------|-----|-----|-----|-----|------|-----|-----|-------|----------|----------|----------|----------|
| Blm_chr7            | 3   | 3   | 5   | 16  | -0.1 | 1.0 | 1.7 | 3.3   | 8.51E-01 | 5.00E-05 | 1.00E+00 | 2.85E-04 |
| Blvrb_chr7          | 23  | 30  | 24  | 107 | 0.4  | 1.3 | 2.1 | 4.4   | 1.28E-01 | 5.00E-05 | 9.54E-01 | 2.85E-04 |
| Bmx_chrX            | 0   | 0   | 0   | 2   | 0.0  | 1.0 | 0.8 | 1.7   | 7.63E-01 | 5.00E-05 | 1.00E+00 | 2.85E-04 |
| Bora_chr14          | 3   | 3   | 5   | 11  | 0.0  | 1.0 | 1.3 | 2.5   | 9.10E-01 | 5.00E-05 | 1.00E+00 | 2.85E-04 |
| Bpgm_chr6           | 57  | 86  | 77  | 157 | 0.6  | 1.5 | 1.0 | 2.0   | 5.49E-03 | 5.00E-05 | 3.58E-01 | 2.85E-04 |
| Brca1_chr11         | 2   | 2   | 3   | 15  | 0.0  | 1.0 | 2.3 | 4.8   | 9.13E-01 | 5.00E-05 | 1.00E+00 | 2.85E-04 |
| Brca2_chr5          | 1   | 1   | 2   | 7   | 0.0  | 1.0 | 1.7 | 3.3   | 7.04E-01 | 5.00E-05 | 1.00E+00 | 2.85E-04 |
| Brip1_chr11         | 1   | 1   | 1   | 4   | 0.0  | 1.0 | 2.1 | 4.2   | 9.62E-01 | 5.00E-05 | 1.00E+00 | 2.85E-04 |
| Btnl10_chr11        | 0   | 0   | 0   | 40  | 0.0  | 1.0 | 5.3 | 40.3  | 6.27E-01 | 5.00E-05 | 1.00E+00 | 2.85E-04 |
| Bub1_chr2           | 1   | 1   | 1   | 11  | -0.1 | 1.1 | 2.8 | 7.0   | 6.43E-01 | 5.00E-05 | 1.00E+00 | 2.92E-04 |
| Bub1b_chr2          | 3   | 3   | 6   | 29  | 0.0  | 1.0 | 2.3 | 5.1   | 9.81E-01 | 5.00E-05 | 1.00E+00 | 2.85E-04 |
| C1qb_chr4           | 65  | 85  | 69  | 144 | 0.4  | 1.3 | 1.0 | 2.1   | 7.07E-02 | 5.00E-05 | 7.84E-01 | 2.85E-04 |
| C1qc_chr4           | 69  | 97  | 79  | 148 | 0.5  | 1.4 | 0.9 | 1.9   | 2.01E-02 | 5.00E-05 | 5.21E-01 | 2.85E-04 |
| C1rl_chr6           | 1   | 1   | 1   | 2   | 0.0  | 1.0 | 0.8 | 1.7   | 7.45E-01 | 5.00E-05 | 1.00E+00 | 2.85E-04 |
| C330027C09Rik_chr16 | 3   | 3   | 4   | 22  | -0.1 | 1.1 | 2.5 | 5.8   | 7.20E-01 | 5.00E-05 | 1.00E+00 | 2.85E-04 |
| C530008M17Rik_chr5  | 0   | 1   | 1   | 8   | 0.0  | 1.0 | 3.0 | 8.2   | 3.44E-01 | 5.00E-05 | 9.98E-01 | 2.85E-04 |
| C5ar1_chr7          | 0   | 1   | 1   | 7   | 0.0  | 1.0 | 2.9 | 7.4   | 3.45E-01 | 5.00E-05 | 9.80E-01 | 2.85E-04 |
| C5ar2_chr7          | 1   | 1   | 2   | 3   | -0.1 | 1.0 | 0.6 | 1.5   | 8.51E-01 | 3.58E-03 | 1.00E+00 | 1.31E-02 |
| C6_chr15            | 6   | 10  | 11  | 29  | 0.6  | 1.5 | 1.4 | 2.6   | 1.26E-02 | 5.00E-05 | 4.18E-01 | 2.85E-04 |
| Cacna1h_chr17       | 2   | 2   | 4   | 9   | -0.2 | 1.2 | 1.1 | 2.2   | 4.05E-01 | 5.00E-05 | 1.00E+00 | 2.85E-04 |
| Camkk1_chr11        | 1   | 1   | 2   | 3   | 0.1  | 1.1 | 0.9 | 1.8   | 8.29E-01 | 5.00E-05 | 1.00E+00 | 2.85E-04 |
| Camp_chr9           | 2   | 9   | 1   | 140 | 2.0  | 4.1 | 6.7 | 103.1 | 2.66E-05 | 5.00E-05 | 4.36E-03 | 2.85E-04 |
| Car1_chr3           | 31  | 24  | 30  | 124 | -0.3 | 1.3 | 2.0 | 4.1   | 1.88E-01 | 5.00E-05 | 9.45E-01 | 2.85E-04 |
| Car2_chr3           | 13  | 27  | 21  | 576 | 1.1  | 2.2 | 4.8 | 26.9  | 1.16E-05 | 5.00E-05 | 2.11E-03 | 2.85E-04 |
| Card10_chr15        | 1   | 1   | 2   | 4   | -0.1 | 1.1 | 0.6 | 1.5   | 7.28E-01 | 1.50E-04 | 1.00E+00 | 7.89E-04 |
| Card9_chr2          | 2   | 3   | 3   | 13  | 0.3  | 1.2 | 1.9 | 3.8   | 4.91E-01 | 5.00E-05 | 1.00E+00 | 2.85E-04 |
| Carhsp1_chr16       | 12  | 12  | 20  | 65  | 0.0  | 1.0 | 1.7 | 3.3   | 8.87E-01 | 5.00E-05 | 1.00E+00 | 2.85E-04 |
| Casc5_chr2          | 2   | 1   | 3   | 28  | -0.4 | 1.3 | 3.1 | 8.4   | 2.17E-01 | 5.00E-05 | 9.56E-01 | 2.85E-04 |
| Casp4_chr9          | 8   | 8   | 8   | 20  | 0.1  | 1.1 | 1.4 | 2.6   | 7.79E-01 | 5.00E-05 | 1.00E+00 | 2.85E-04 |
| Ccdc18_chr5         | 1   | 0   | 1   | 4   | 0.0  | 1.0 | 2.1 | 4.2   | 2.89E-01 | 5.00E-05 | 9.95E-01 | 2.85E-04 |
| Ccdc34_chr2         | 2   | 2   | 1   | 5   | 0.3  | 1.2 | 2.0 | 4.0   | 5.25E-01 | 5.00E-05 | 1.00E+00 | 2.85E-04 |
| Ccl6_chr11          | 13  | 9   | 10  | 26  | -0.6 | 1.5 | 1.4 | 2.6   | 3.55E-02 | 5.00E-05 | 7.70E-01 | 2.85E-04 |
| Ccl9_chr11          | 3   | 2   | 3   | 5   | -0.4 | 1.3 | 0.9 | 1.9   | 2.81E-01 | 5.00E-05 | 9.94E-01 | 2.85E-04 |
| Ccna2_chr3          | 5   | 6   | 7   | 82  | 0.3  | 1.2 | 3.5 | 11.3  | 3.49E-01 | 5.00E-05 | 9.98E-01 | 2.85E-04 |
| Ccnb1_chr13         | 4   | 4   | 5   | 45  | 0.2  | 1.1 | 3.2 | 9.4   | 5.60E-01 | 5.00E-05 | 1.00E+00 | 2.85E-04 |
| Ccnb2_chr9          | 4   | 4   | 5   | 56  | 0.2  | 1.1 | 3.5 | 11.4  | 5.98E-01 | 5.00E-05 | 1.00E+00 | 2.85E-04 |
| Ccne1_chr7          | 3   | 4   | 4   | 25  | 0.3  | 1.2 | 2.7 | 6.3   | 3.73E-01 | 5.00E-05 | 1.00E+00 | 2.85E-04 |
| Ccnf_chr17          | 2   | 3   | 5   | 33  | 0.6  | 1.5 | 2.9 | 7.3   | 9.13E-02 | 5.00E-05 | 9.27E-01 | 2.85E-04 |
| Ccp110_chr7         | 3   | 3   | 4   | 14  | 0.0  | 1.0 | 1.6 | 3.1   | 8.60E-01 | 5.00E-05 | 1.00E+00 | 2.85E-04 |
| Ccr1_chr9           | 7   | 6   | 7   | 27  | -0.2 | 1.1 | 1.9 | 3.7   | 5.03E-01 | 5.00E-05 | 1.00E+00 | 2.85E-04 |
| Ccr2_chr9           | 19  | 20  | 25  | 64  | 0.1  | 1.0 | 1.4 | 2.6   | 7.69E-01 | 5.00E-05 | 1.00E+00 | 2.85E-04 |
| Ccr12_chr9          | 1   | 2   | 2   | 7   | 0.8  | 1.7 | 1.8 | 3.4   | 8.02E-02 | 5.00E-05 | 9.08E-01 | 2.85E-04 |
| Ccrn4l_chr3         | 2   | 2   | 3   | 14  | 0.0  | 1.0 | 2.2 | 4.6   | 9.10E-01 | 5.00E-05 | 1.00E+00 | 2.85E-04 |
| Cd14_chr18          | 5   | 5   | 7   | 12  | 0.2  | 1.2 | 0.8 | 1.7   | 5.42E-01 | 5.00E-05 | 1.00E+00 | 2.85E-04 |
| Cd177_chr7          | 1   | 1   | 1   | 25  | 0.3  | 1.2 | 4.6 | 24.4  | 1.75E-02 | 5.00E-05 | 5.93E-01 | 2.85E-04 |
| Cd200r4_chr16       | 1   | 1   | 1   | 3   | 0.3  | 1.2 | 1.5 | 2.8   | 6.21E-01 | 5.00E-05 | 1.00E+00 | 2.85E-04 |
| Cd24a_chr10         | 133 | 163 | 160 | 731 | 0.3  | 1.2 | 2.2 | 4.6   | 1.92E-01 | 5.00E-05 | 9.86E-01 | 2.85E-04 |
| Cd300lb_chr11       | 3   | 3   | 5   | 13  | 0.0  | 1.0 | 1.3 | 2.5   | 9.35E-01 | 5.00E-05 | 1.00E+00 | 2.85E-04 |
| Cd300lf_chr11       | 7   | 8   | 10  | 30  | 0.2  | 1.2 | 1.6 | 2.9   | 6.15E-01 | 5.00E-05 | 1.00E+00 | 2.85E-04 |
| Cd33_chr7           | 7   | 5   | 7   | 13  | -0.5 | 1.5 | 1.1 | 2.1   | 8.71E-02 | 3.47E-03 | 8.71E-01 | 1.16E-02 |
| Cd5l_chr3           | 27  | 33  | 42  | 186 | 0.3  | 1.2 | 2.2 | 4.5   | 1.47E-01 | 5.00E-05 | 9.00E-01 | 2.85E-04 |
| Cdc20_chr4          | 3   | 5   | 6   | 31  | 0.6  | 1.6 | 2.4 | 5.4   | 2.02E-01 | 5.00E-05 | 9.87E-01 | 2.85E-04 |
| Cdc25c_chr18        | 0   | 1   | 1   | 5   | 0.0  | 1.0 | 2.3 | 4.9   | 7.05E-01 | 5.00E-05 | 1.00E+00 | 2.85E-04 |
| Cdc6_chr11          | 1   | 1   | 2   | 22  | 0.5  | 1.4 | 3.5 | 11.7  | 1.61E-01 | 5.00E-05 | 9.22E-01 | 2.85E-04 |
| Cdca2_chr14         | 1   | 1   | 1   | 7   | 0.1  | 1.0 | 2.2 | 4.6   | 7.89E-01 | 5.00E-05 | 1.00E+00 | 2.89E-04 |
| Cdca3_chr6          | 2   | 3   | 2   | 35  | 0.8  | 1.7 | 4.0 | 15.6  | 6.01E-02 | 5.00E-05 | 8.74E-01 | 2.85E-04 |
| Cdca5_chr19         | 1   | 2   | 2   | 15  | 0.7  | 1.6 | 2.6 | 5.9   | 1.39E-01 | 5.00E-05 | 9.62E-01 | 2.85E-04 |
| Cdca8_chr4          | 3   | 4   | 4   | 34  | 0.3  | 1.3 | 3.0 | 7.7   | 3.96E-01 | 5.00E-05 | 1.00E+00 | 2.85E-04 |
| Cdk1_chr10          | 2   | 2   | 2   | 20  | 0.3  | 1.2 | 3.4 | 10.3  | 4.65E-01 | 5.00E-05 | 1.00E+00 | 2.85E-04 |
| Cdkn2c_chr4         | 5   | 5   | 4   | 16  | 0.1  | 1.0 | 1.9 | 3.7   | 8.80E-01 | 5.00E-05 | 1.00E+00 | 2.85E-04 |
| Cdkn2d_chr9         | 11  | 14  | 14  | 34  | 0.3  | 1.2 | 1.3 | 2.4   | 2.42E-01 | 5.00E-05 | 9.92E-01 | 2.85E-04 |
| Cdkn3_chr14         | 1   | 1   | 1   | 13  | 0.0  | 1.0 | 3.7 | 13.4  | 7.81E-01 | 5.00E-05 | 1.00E+00 | 2.85E-04 |
| Cdr2_chr7           | 13  | 17  | 26  | 107 | 0.4  | 1.3 | 2.1 | 4.2   | 6.58E-02 | 5.00E-05 | 8.76E-01 | 2.85E-04 |
| Cebpb_chr2          | 1   | 2   | 2   | 5   | 0.5  | 1.4 | 1.4 | 2.6   | 2.82E-01 | 5.00E-05 | 9.94E-01 | 2.85E-04 |
| Cebpd_chr16         | 1   | 2   | 2   | 4   | 0.1  | 1.1 | 0.9 | 1.9   | 8.12E-01 | 2.76E-02 | 1.00E+00 | 7.30E-02 |
| Cebpe_chr14         | 0   | 0   | 0   | 7   | 0.0  | 1.0 | 2.7 | 6.7   | 1.98E-01 | 5.00E-05 | 1.00E+00 | 2.85E-04 |
| Cenpa_chr5          | 6   | 7   | 8   | 27  | 0.2  | 1.1 | 1.7 | 3.3   | 6.12E-01 | 5.00E-05 | 1.00E+00 | 2.85E-04 |
| Cenpe_chr3          | 2   | 2   | 3   | 24  | 0.0  | 1.0 | 3.0 | 7.9   | 9.08E-01 | 5.00E-05 | 1.00E+00 | 2.85E-04 |
| Cenpf_chr1          | 1   | 1   | 2   | 22  | 0.0  | 1.0 | 3.6 | 12.0  | 7.51E-01 | 5.00E-05 | 1.00E+00 | 2.85E-04 |
| Cenph_chr13         | 2   | 2   | 2   | 11  | 0.3  | 1.2 | 2.8 | 6.9   | 5.31E-01 | 5.00E-05 | 1.00E+00 | 2.85E-04 |
| Cenpi_chrX          | 1   | 1   | 1   | 10  | 0.0  | 1.0 | 2.9 | 7.4   | 9.02E-01 | 5.00E-05 | 1.00E+00 | 2.85E-04 |
| Cenpl_chr1          | 2   | 3   | 3   | 12  | 0.3  | 1.2 | 2.1 | 4.2   | 5.59E-01 | 5.00E-05 | 1.00E+00 | 2.92E-04 |
| Cenpn_chr8          | 1   | 2   | 2   | 10  | 0.3  | 1.3 | 2.5 | 5.5   | 4.64E-01 | 5.00E-05 | 1.00E+00 | 2.85E-04 |
| Cenpv_chr11         | 1   | 1   | 2   | 3   | 0.2  | 1.2 | 1.0 | 2.0   | 7.24E-01 | 5.00E-05 | 1.00E+00 | 2.85E-04 |
| Cep76_chr18         | 2   | 3   | 4   | 19  | 0.2  | 1.1 | 2.4 | 5.3   | 5.29E-01 | 5.00E-05 | 1.00E+00 | 2.85E-04 |
| Cercam_chr2         | 1   | 1   | 1   | 7   | 0.4  | 1.3 | 2.5 | 5.6   | 8.53E-03 | 5.00E-05 | 4.41E-01 | 2.85E-04 |
| Ces2g_chr8          | 2   | 2   | 4   | 36  | 0.0  | 1.0 | 3.1 | 8.6   | 9.53E-01 | 5.00E-05 | 1.00E+00 | 2.85E-04 |
| Chaf1a_chr17        | 2   | 3   | 4   | 21  | 0.4  | 1.4 | 2.2 | 4.7   | 1.83E-01 | 5.00E-05 | 9.86E-01 | 2.85E-04 |
| Chaf1b_chr16        | 2   | 3   | 3   | 12  | 0.4  | 1.3 | 1.8 | 3.5   | 3.34E-01 | 5.00E-05 | 9.98E-01 | 2.85E-04 |
| Chek1_chr9          | 1   | 1   | 1   | 8   | -0.1 | 1.1 | 2.6 | 6.0   | 7.19E-01 | 5.00E-05 | 1.00E+00 | 2.85E-04 |
| Chil1_chr1          | 1   | 1   | 1   | 10  | 0.0  | 1.0 | 3.0 | 8.1   | 6.03E-01 | 5.00E-05 | 1.00E+00 | 2.85E-04 |

|                     |    |    |    |     |      |     |     |      |          |          |          |          |
|---------------------|----|----|----|-----|------|-----|-----|------|----------|----------|----------|----------|
| Chil3_chr3          | 4  | 7  | 4  | 290 | 1.0  | 1.9 | 6.1 | 68.4 | 4.12E-03 | 5.00E-05 | 2.35E-01 | 2.85E-04 |
| Chtf18_chr17        | 1  | 2  | 3  | 11  | 0.4  | 1.3 | 1.9 | 3.7  | 3.53E-01 | 5.00E-05 | 9.98E-01 | 2.85E-04 |
| Cish_chr9           | 2  | 3  | 4  | 7   | 0.4  | 1.3 | 0.9 | 1.8  | 2.85E-01 | 5.00E-05 | 9.95E-01 | 2.85E-04 |
| Cit_chr5            | 1  | 1  | 2  | 17  | 0.0  | 1.0 | 3.1 | 8.6  | 5.52E-01 | 5.00E-05 | 1.00E+00 | 2.85E-04 |
| Ckap2_chr8          | 1  | 1  | 2  | 12  | 0.2  | 1.2 | 2.8 | 7.1  | 6.44E-01 | 5.00E-05 | 1.00E+00 | 2.85E-04 |
| Ckap2l_chr2         | 2  | 2  | 4  | 23  | 0.2  | 1.2 | 2.7 | 6.3  | 5.41E-01 | 5.00E-05 | 1.00E+00 | 2.85E-04 |
| Ckap4_chr10         | 5  | 8  | 11 | 26  | 0.6  | 1.6 | 1.2 | 2.4  | 1.29E-02 | 5.00E-05 | 5.25E-01 | 2.85E-04 |
| Cks1b_chr3          | 5  | 6  | 5  | 19  | 0.3  | 1.2 | 1.9 | 3.6  | 5.27E-01 | 5.00E-05 | 1.00E+00 | 2.85E-04 |
| Cks2_chr13          | 11 | 12 | 7  | 43  | 0.1  | 1.1 | 2.6 | 6.1  | 7.40E-01 | 5.00E-05 | 1.00E+00 | 2.85E-04 |
| Clca1_chr3          | 31 | 30 | 48 | 94  | 0.0  | 1.0 | 0.9 | 1.9  | 9.42E-01 | 5.00E-05 | 1.00E+00 | 2.85E-04 |
| Clcn2_chr16         | 1  | 1  | 2  | 8   | 0.0  | 1.0 | 2.3 | 4.8  | 9.55E-01 | 5.00E-05 | 1.00E+00 | 2.85E-04 |
| Cldn13_chr5         | 1  | 2  | 1  | 44  | 0.8  | 1.7 | 5.5 | 43.9 | 1.55E-01 | 5.00E-05 | 9.13E-01 | 2.85E-04 |
| Cldn15_chr5         | 0  | 1  | 0  | 2   | 0.0  | 1.0 | 1.0 | 2.0  | 1.08E-01 | 5.00E-05 | 9.38E-01 | 2.85E-04 |
| Clec12a_chr6        | 13 | 14 | 11 | 28  | 0.1  | 1.1 | 1.3 | 2.5  | 5.88E-01 | 5.00E-05 | 1.00E+00 | 2.85E-04 |
| Clec1b_chr6         | 3  | 4  | 3  | 9   | 0.6  | 1.5 | 1.8 | 3.4  | 2.08E-01 | 5.00E-05 | 9.86E-01 | 2.85E-04 |
| Clec4a2_chr6        | 6  | 6  | 4  | 15  | 0.1  | 1.0 | 1.8 | 3.4  | 8.20E-01 | 5.00E-05 | 1.00E+00 | 2.85E-04 |
| Clec4a3_chr6        | 17 | 16 | 15 | 30  | -0.1 | 1.1 | 1.0 | 2.0  | 6.84E-01 | 5.00E-05 | 1.00E+00 | 2.85E-04 |
| Clec4d_chr6         | 1  | 1  | 1  | 8   | -0.1 | 1.0 | 2.9 | 7.5  | 9.14E-01 | 5.00E-05 | 1.00E+00 | 2.85E-04 |
| Clec4e_chr6         | 1  | 0  | 1  | 5   | 0.0  | 1.0 | 2.4 | 5.4  | 3.84E-01 | 5.00E-05 | 1.00E+00 | 2.85E-04 |
| Clec5a_chr6         | 1  | 0  | 1  | 5   | 0.0  | 1.0 | 2.2 | 4.6  | 2.34E-01 | 5.00E-05 | 9.59E-01 | 2.85E-04 |
| Clec7a_chr6         | 8  | 6  | 10 | 27  | -0.4 | 1.3 | 1.4 | 2.7  | 1.29E-01 | 5.00E-05 | 9.54E-01 | 2.85E-04 |
| Clhc1_chr4          | 0  | 0  | 0  | 2   | 0.0  | 1.0 | 1.0 | 2.0  | 3.23E-01 | 5.00E-05 | 9.98E-01 | 2.85E-04 |
| Clspn_chr4          | 1  | 1  | 2  | 17  | 0.2  | 1.1 | 3.1 | 8.8  | 5.99E-01 | 5.00E-05 | 1.00E+00 | 2.85E-04 |
| Cmas_chr6           | 12 | 16 | 16 | 54  | 0.5  | 1.4 | 1.7 | 3.3  | 6.23E-02 | 5.00E-05 | 8.76E-01 | 2.85E-04 |
| Cox6b2_chr7         | 2  | 2  | 1  | 3   | 0.1  | 1.1 | 1.3 | 2.5  | 8.90E-01 | 7.50E-05 | 1.00E+00 | 4.21E-04 |
| Cpd_chr11           | 3  | 3  | 7  | 11  | -0.1 | 1.0 | 0.8 | 1.7  | 8.31E-01 | 5.00E-05 | 1.00E+00 | 2.85E-04 |
| Cpeb3_chr19         | 1  | 1  | 1  | 5   | 0.0  | 1.0 | 2.2 | 4.6  | 6.06E-01 | 5.00E-05 | 1.00E+00 | 2.85E-04 |
| Cpne2_chr8          | 3  | 4  | 6  | 13  | 0.3  | 1.2 | 1.0 | 2.1  | 3.94E-01 | 5.00E-05 | 1.00E+00 | 2.85E-04 |
| Cpox_chr16          | 8  | 11 | 14 | 162 | 0.4  | 1.3 | 3.5 | 11.4 | 8.65E-02 | 5.00E-05 | 8.26E-01 | 2.85E-04 |
| Cpxm1_chr2          | 4  | 12 | 9  | 18  | 1.4  | 2.7 | 1.0 | 2.0  | 6.15E-08 | 5.00E-05 | 3.76E-05 | 2.85E-04 |
| Creg1_chr1          | 31 | 33 | 45 | 107 | 0.1  | 1.1 | 1.2 | 2.4  | 6.31E-01 | 5.00E-05 | 1.00E+00 | 2.85E-04 |
| Creld2_chr15        | 13 | 17 | 19 | 33  | 0.3  | 1.2 | 0.8 | 1.7  | 2.31E-01 | 5.00E-05 | 9.91E-01 | 2.85E-04 |
| Csf3r_chr4          | 8  | 7  | 13 | 66  | -0.2 | 1.1 | 2.4 | 5.2  | 4.78E-01 | 5.00E-05 | 1.00E+00 | 2.93E-04 |
| Ctse_chr1           | 7  | 11 | 10 | 164 | 0.6  | 1.5 | 4.0 | 15.7 | 1.97E-02 | 5.00E-05 | 5.18E-01 | 2.85E-04 |
| Ctsg_chr14          | 0  | 1  | 0  | 26  | 0.0  | 1.0 | 4.7 | 26.0 | 1.90E-01 | 5.00E-05 | 9.86E-01 | 2.85E-04 |
| Cxcr2_chr1          | 5  | 3  | 7  | 30  | -0.5 | 1.4 | 2.2 | 4.6  | 1.01E-01 | 5.00E-05 | 8.47E-01 | 2.85E-04 |
| Cyp4b1_chr4         | 2  | 3  | 4  | 11  | 0.4  | 1.4 | 1.5 | 2.9  | 2.74E-01 | 5.00E-05 | 9.94E-01 | 2.85E-04 |
| Cysltr2_chr14       | 0  | 1  | 0  | 4   | 0.0  | 1.0 | 2.0 | 3.9  | 1.60E-01 | 5.00E-05 | 9.78E-01 | 2.85E-04 |
| D430020J02Rik_chr12 | 1  | 1  | 2  | 3   | 0.0  | 1.0 | 0.9 | 1.9  | 7.82E-01 | 5.00E-05 | 1.00E+00 | 2.82E-04 |
| Dach1_chr14         | 0  | 0  | 0  | 2   | 0.0  | 1.0 | 0.9 | 1.9  | 7.80E-01 | 5.00E-05 | 1.00E+00 | 2.61E-04 |
| Dapk2_chr9          | 4  | 4  | 6  | 13  | 0.3  | 1.2 | 1.2 | 2.3  | 4.40E-01 | 5.00E-05 | 1.00E+00 | 2.85E-04 |
| Dclre1a_chr19       | 2  | 2  | 3  | 8   | -0.2 | 1.1 | 1.2 | 2.3  | 6.63E-01 | 5.00E-05 | 1.00E+00 | 2.85E-04 |
| Ddias_chr7          | 1  | 1  | 1  | 7   | 0.0  | 1.0 | 2.3 | 4.8  | 6.37E-01 | 5.00E-05 | 1.00E+00 | 2.85E-04 |
| Deb1_chr9           | 5  | 5  | 3  | 7   | -0.1 | 1.1 | 1.2 | 2.2  | 7.58E-01 | 5.00E-05 | 1.00E+00 | 2.85E-04 |
| Dek_chr13           | 53 | 52 | 66 | 260 | 0.0  | 1.0 | 2.0 | 4.0  | 9.71E-01 | 5.00E-05 | 1.00E+00 | 2.85E-04 |
| Dennd2c_chr3        | 1  | 1  | 1  | 6   | 0.0  | 1.0 | 2.4 | 5.3  | 8.75E-01 | 5.00E-05 | 1.00E+00 | 2.85E-04 |
| Depdc1b_chr13       | 1  | 1  | 1  | 12  | 0.4  | 1.4 | 3.2 | 9.5  | 1.39E-02 | 5.00E-05 | 5.33E-01 | 2.85E-04 |
| Derl3_chr10         | 4  | 5  | 5  | 15  | 0.4  | 1.3 | 1.7 | 3.2  | 2.77E-01 | 5.00E-05 | 9.94E-01 | 2.85E-04 |
| Dfna5_chr6          | 0  | 1  | 1  | 3   | 0.0  | 1.0 | 1.7 | 3.2  | 4.13E-01 | 5.00E-05 | 1.00E+00 | 2.85E-04 |
| Dgat2_chr7          | 2  | 2  | 4  | 7   | -0.4 | 1.4 | 0.8 | 1.7  | 2.91E-01 | 5.00E-05 | 9.96E-01 | 2.85E-04 |
| Dhrs11_chr11        | 5  | 9  | 8  | 76  | 0.9  | 1.8 | 3.2 | 9.2  | 5.74E-03 | 5.00E-05 | 3.63E-01 | 2.85E-04 |
| Dhrs9_chr2          | 0  | 0  | 1  | 5   | 0.0  | 1.0 | 2.2 | 4.7  | 7.86E-01 | 5.00E-05 | 1.00E+00 | 2.85E-04 |
| Diap3_chr14         | 1  | 1  | 3  | 20  | 0.4  | 1.3 | 3.0 | 7.8  | 3.32E-01 | 5.00E-05 | 9.98E-01 | 2.85E-04 |
| Dlgap5_chr14        | 2  | 2  | 4  | 27  | 0.0  | 1.0 | 2.9 | 7.3  | 8.90E-01 | 5.00E-05 | 1.00E+00 | 2.85E-04 |
| Dmtn_chr14          | 0  | 1  | 1  | 24  | 0.0  | 1.0 | 4.2 | 18.3 | 3.74E-01 | 2.34E-03 | 9.97E-01 | 7.37E-03 |
| Dmxl2_chr9          | 2  | 2  | 5  | 8   | -0.3 | 1.2 | 0.8 | 1.7  | 2.39E-01 | 5.00E-05 | 9.68E-01 | 2.85E-04 |
| Dna2_chr10          | 3  | 4  | 6  | 17  | 0.1  | 1.1 | 1.4 | 2.7  | 5.98E-01 | 5.00E-05 | 1.00E+00 | 2.85E-04 |
| Dpf3_chr12          | 0  | 0  | 0  | 3   | 0.0  | 1.0 | 1.7 | 3.3  | 9.36E-01 | 5.00E-05 | 1.00E+00 | 2.85E-04 |
| Dscc1_chr15         | 1  | 1  | 1  | 5   | 0.0  | 1.0 | 2.4 | 5.2  | 6.78E-01 | 5.00E-05 | 1.00E+00 | 2.85E-04 |
| Dtl_chr1            | 2  | 3  | 4  | 21  | 0.3  | 1.2 | 2.5 | 5.6  | 3.72E-01 | 5.00E-05 | 1.00E+00 | 2.85E-04 |
| Dtwd1_chr2          | 3  | 3  | 3  | 5   | 0.1  | 1.1 | 0.7 | 1.7  | 8.10E-01 | 5.00E-05 | 1.00E+00 | 2.85E-04 |
| Dusp8_chr7          | 0  | 0  | 1  | 4   | 0.0  | 1.0 | 2.2 | 4.5  | 8.33E-01 | 5.00E-05 | 1.00E+00 | 2.85E-04 |
| Dyrk3_chr1          | 1  | 1  | 1  | 13  | 0.0  | 1.0 | 3.7 | 12.9 | 9.01E-01 | 5.00E-05 | 1.00E+00 | 2.85E-04 |
| E130309D14Rik_chr11 | 0  | 0  | 0  | 12  | 0.0  | 1.0 | 3.5 | 11.6 | 4.53E-02 | 5.00E-05 | 1.00E+00 | 2.85E-04 |
| E230029C05Rik_chr7  | 1  | 1  | 2  | 4   | -0.1 | 1.1 | 1.2 | 2.4  | 3.52E-01 | 5.00E-05 | 9.98E-01 | 2.82E-04 |
| E2f1_chr2           | 2  | 3  | 4  | 15  | 0.2  | 1.2 | 1.8 | 3.5  | 5.38E-01 | 5.00E-05 | 1.00E+00 | 2.85E-04 |
| E2f2_chr4           | 9  | 12 | 19 | 94  | 0.5  | 1.4 | 2.3 | 5.0  | 3.34E-02 | 5.00E-05 | 7.66E-01 | 2.85E-04 |
| E2f7_chr10          | 0  | 0  | 1  | 5   | 0.0  | 1.0 | 2.3 | 4.8  | 3.41E-01 | 5.00E-05 | 1.00E+00 | 2.85E-04 |
| E2f8_chr7           | 1  | 2  | 3  | 37  | 0.4  | 1.4 | 3.7 | 13.0 | 2.47E-01 | 5.00E-05 | 9.92E-01 | 2.85E-04 |
| Eaf2_chr16          | 2  | 2  | 2  | 5   | 0.1  | 1.1 | 1.4 | 2.6  | 8.54E-01 | 7.50E-05 | 1.00E+00 | 3.94E-04 |
| Ear1_chr14          | 1  | 1  | 0  | 6   | 0.0  | 1.0 | 2.7 | 6.3  | 6.63E-01 | 5.00E-05 | 1.00E+00 | 2.85E-04 |
| Ear12_chr14         | 13 | 16 | 9  | 26  | 0.2  | 1.2 | 1.6 | 3.0  | 4.65E-01 | 5.00E-05 | 1.00E+00 | 2.92E-04 |
| Ear2_chr14          | 13 | 16 | 9  | 26  | 0.2  | 1.2 | 1.6 | 3.0  | 4.65E-01 | 5.00E-05 | 1.00E+00 | 2.85E-04 |
| Ear6_chr14          | 0  | 0  | 0  | 7   | 0.0  | 1.0 | 2.8 | 7.0  | 8.84E-01 | 5.00E-05 | 1.00E+00 | 2.85E-04 |
| Ear7_chr14          | 0  | 0  | 0  | 7   | 0.0  | 1.0 | 2.8 | 7.0  | 9.54E-01 | 5.00E-05 | 1.00E+00 | 2.70E-04 |
| Ect2_chr3           | 2  | 2  | 2  | 15  | 0.2  | 1.1 | 2.8 | 6.8  | 7.01E-01 | 5.83E-05 | 1.00E+00 | 3.31E-04 |
| Eif4ebp1_chr8       | 6  | 7  | 7  | 14  | 0.2  | 1.2 | 1.0 | 1.9  | 5.47E-01 | 5.00E-05 | 1.00E+00 | 2.85E-04 |
| Emilin2_chr17       | 2  | 2  | 5  | 25  | 0.0  | 1.0 | 2.3 | 5.0  | 9.88E-01 | 5.00E-05 | 1.00E+00 | 2.85E-04 |
| Epb4.2_chr2         | 1  | 3  | 4  | 118 | 1.0  | 1.9 | 5.0 | 32.6 | 9.29E-03 | 5.00E-05 | 3.49E-01 | 2.85E-04 |
| Epdr1_chr13         | 1  | 1  | 2  | 6   | 0.0  | 1.0 | 1.8 | 3.4  | 9.43E-01 | 5.00E-05 | 1.00E+00 | 2.85E-04 |
| Epor_chr9           | 2  | 2  | 2  | 26  | 0.4  | 1.4 | 3.4 | 10.4 | 3.33E-01 | 5.00E-05 | 9.98E-01 | 2.85E-04 |

|                     |     |     |     |     |      |     |     |      |          |          |          |          |
|---------------------|-----|-----|-----|-----|------|-----|-----|------|----------|----------|----------|----------|
| Epx_chr11           | 0   | 0   | 0   | 3   | 0.0  | 1.0 | 1.7 | 3.3  | 2.07E-01 | 5.00E-05 | 1.00E+00 | 2.85E-04 |
| Ermap_chr4          | 3   | 3   | 6   | 130 | 0.1  | 1.0 | 4.5 | 23.0 | 8.52E-01 | 5.00E-05 | 1.00E+00 | 2.85E-04 |
| Esco2_chr14         | 2   | 1   | 2   | 27  | -0.2 | 1.1 | 3.7 | 12.7 | 7.19E-01 | 5.00E-05 | 1.00E+00 | 2.85E-04 |
| Espl1_chr15         | 1   | 2   | 3   | 19  | 0.2  | 1.2 | 2.7 | 6.5  | 5.24E-01 | 5.00E-05 | 1.00E+00 | 2.85E-04 |
| Exo1_chr1           | 0   | 0   | 1   | 3   | 0.0  | 1.0 | 1.8 | 3.5  | 5.54E-01 | 5.00E-05 | 1.00E+00 | 2.85E-04 |
| F10_chr8            | 0   | 0   | 1   | 3   | 0.0  | 1.0 | 1.5 | 2.9  | 4.99E-01 | 5.00E-05 | 1.00E+00 | 2.61E-04 |
| F13a1_chr13         | 2   | 2   | 4   | 21  | -0.1 | 1.0 | 2.4 | 5.3  | 8.78E-01 | 5.00E-05 | 1.00E+00 | 2.85E-04 |
| F5_chr1             | 1   | 1   | 2   | 5   | 0.5  | 1.4 | 1.3 | 2.5  | 4.43E-02 | 5.00E-05 | 7.07E-01 | 2.85E-04 |
| F630028O10Rik_chrX  | 8   | 6   | 5   | 17  | -0.3 | 1.2 | 1.9 | 3.7  | 2.42E-01 | 5.00E-05 | 9.89E-01 | 2.82E-04 |
| F830002L21Rik_chr10 | 0   | 0   | 0   | 9   | 0.0  | 1.0 | 3.1 | 8.6  | 2.90E-01 | 5.00E-05 | 1.00E+00 | 2.82E-04 |
| Fabp4_chr3          | 4   | 3   | 3   | 8   | -0.6 | 1.5 | 1.3 | 2.5  | 2.71E-01 | 5.00E-05 | 9.94E-01 | 2.85E-04 |
| Fads2_chr19         | 3   | 3   | 7   | 12  | 0.3  | 1.2 | 0.8 | 1.7  | 5.16E-01 | 5.00E-05 | 1.00E+00 | 2.85E-04 |
| Fahd1_chr17         | 3   | 3   | 3   | 13  | 0.2  | 1.1 | 2.1 | 4.2  | 6.82E-01 | 5.00E-05 | 1.00E+00 | 2.85E-04 |
| Fam109b_chr15       | 1   | 1   | 2   | 19  | -0.4 | 1.3 | 3.1 | 8.4  | 3.89E-01 | 5.00E-05 | 1.00E+00 | 2.85E-04 |
| Fam117a_chr11       | 16  | 19  | 36  | 108 | 0.3  | 1.2 | 1.6 | 3.0  | 2.02E-01 | 5.00E-05 | 9.87E-01 | 2.85E-04 |
| Fam132a_chr4        | 2   | 3   | 4   | 23  | 0.4  | 1.3 | 2.7 | 6.4  | 3.98E-01 | 5.00E-05 | 1.00E+00 | 2.85E-04 |
| Fam132b_chr1        | 0   | 0   | 0   | 3   | 0.0  | 1.0 | 1.7 | 3.3  | 8.62E-01 | 5.00E-05 | 1.00E+00 | 2.85E-04 |
| Fam210b_chr2        | 4   | 5   | 6   | 17  | 0.4  | 1.3 | 1.6 | 3.0  | 1.70E-01 | 5.00E-05 | 9.80E-01 | 2.85E-04 |
| Fam213a_chr14       | 15  | 19  | 23  | 89  | 0.4  | 1.3 | 2.0 | 3.9  | 1.08E-01 | 5.00E-05 | 9.38E-01 | 2.85E-04 |
| Fam217b_chr2        | 1   | 1   | 1   | 3   | 0.0  | 1.0 | 1.1 | 2.2  | 8.54E-01 | 5.00E-05 | 1.00E+00 | 2.85E-04 |
| Fam46c_chr3         | 17  | 19  | 74  | 245 | 0.2  | 1.2 | 1.7 | 3.3  | 3.42E-01 | 5.00E-05 | 9.92E-01 | 2.85E-04 |
| Fam83d_chr2         | 0   | 0   | 1   | 4   | 0.0  | 1.0 | 2.0 | 3.9  | 5.72E-01 | 5.00E-05 | 1.00E+00 | 2.85E-04 |
| Fancd2_chr6         | 1   | 1   | 2   | 10  | 0.4  | 1.3 | 2.3 | 4.8  | 2.88E-01 | 5.00E-05 | 9.95E-01 | 2.85E-04 |
| Fbxo17_chr7         | 1   | 1   | 1   | 2   | 0.0  | 1.0 | 0.7 | 1.7  | 8.47E-01 | 5.00E-05 | 1.00E+00 | 2.85E-04 |
| Fbxo5_chr10         | 7   | 7   | 8   | 38  | 0.1  | 1.0 | 2.3 | 4.9  | 8.42E-01 | 5.00E-05 | 1.00E+00 | 2.85E-04 |
| Fcgr1_chr3          | 2   | 3   | 3   | 7   | 0.3  | 1.2 | 1.3 | 2.5  | 3.82E-01 | 5.00E-05 | 1.00E+00 | 2.85E-04 |
| Fcgr3_chr1          | 17  | 17  | 17  | 40  | 0.0  | 1.0 | 1.2 | 2.4  | 8.73E-01 | 5.00E-05 | 1.00E+00 | 2.85E-04 |
| Fcgr4_chr1          | 4   | 6   | 4   | 28  | 0.6  | 1.5 | 2.9 | 7.4  | 1.29E-01 | 5.00E-05 | 9.54E-01 | 2.85E-04 |
| Fcnb_chr2           | 0   | 1   | 0   | 16  | 0.0  | 1.0 | 4.0 | 16.0 | 8.30E-02 | 5.00E-05 | 8.18E-01 | 2.85E-04 |
| Fech_chr18          | 14  | 22  | 32  | 211 | 0.7  | 1.6 | 2.7 | 6.6  | 1.75E-03 | 5.00E-05 | 1.80E-01 | 2.85E-04 |
| Fen1_chr19          | 6   | 9   | 11  | 39  | 0.6  | 1.5 | 1.8 | 3.5  | 3.68E-02 | 5.00E-05 | 7.72E-01 | 2.85E-04 |
| Fhdc1_chr3          | 1   | 1   | 1   | 18  | 0.0  | 1.0 | 3.9 | 15.1 | 3.87E-01 | 1.12E-03 | 1.00E+00 | 4.35E-03 |
| Fkbp11_chr15        | 1   | 1   | 1   | 3   | 0.5  | 1.4 | 1.7 | 3.3  | 3.79E-01 | 5.00E-05 | 1.00E+00 | 2.85E-04 |
| Fn3k_chr11          | 0   | 0   | 0   | 14  | 0.0  | 1.0 | 3.8 | 13.7 | 6.95E-01 | 1.33E-04 | 1.00E+00 | 7.20E-04 |
| Fn3krp_chr11        | 3   | 4   | 6   | 27  | 0.3  | 1.2 | 2.2 | 4.7  | 4.56E-01 | 5.00E-05 | 1.00E+00 | 2.85E-04 |
| Fnip2_chr3          | 2   | 2   | 4   | 13  | -0.1 | 1.1 | 1.6 | 3.0  | 6.68E-01 | 5.00E-05 | 1.00E+00 | 2.85E-04 |
| Fosl2_chr5          | 2   | 3   | 5   | 11  | 0.4  | 1.4 | 1.1 | 2.1  | 9.90E-02 | 5.00E-05 | 8.44E-01 | 2.85E-04 |
| Foxm1_chr6          | 3   | 4   | 6   | 22  | 0.3  | 1.2 | 1.8 | 3.4  | 3.58E-01 | 5.00E-05 | 9.98E-01 | 2.85E-04 |
| Fpr1_chr17          | 3   | 3   | 3   | 9   | -0.1 | 1.1 | 1.4 | 2.7  | 8.09E-01 | 5.00E-05 | 1.00E+00 | 2.85E-04 |
| Fpr2_chr17          | 2   | 2   | 2   | 11  | 0.0  | 1.0 | 2.5 | 5.8  | 9.49E-01 | 5.00E-05 | 1.00E+00 | 2.85E-04 |
| Fzr1_chr10          | 9   | 12  | 19  | 63  | 0.5  | 1.4 | 1.7 | 3.3  | 5.48E-02 | 5.00E-05 | 8.54E-01 | 2.85E-04 |
| G6pdx_chrX          | 12  | 16  | 21  | 36  | 0.4  | 1.4 | 0.8 | 1.7  | 2.11E-01 | 2.85E-03 | 9.88E-01 | 1.07E-02 |
| Gadd45a_chr6        | 6   | 7   | 6   | 22  | 0.4  | 1.3 | 2.0 | 3.9  | 2.19E-01 | 5.00E-05 | 9.90E-01 | 2.85E-04 |
| Galnt3_chr2         | 3   | 3   | 5   | 10  | 0.2  | 1.2 | 1.0 | 2.0  | 4.74E-01 | 5.00E-05 | 1.00E+00 | 2.85E-04 |
| Garem_chr18         | 0   | 0   | 1   | 6   | 0.0  | 1.0 | 2.6 | 6.2  | 7.63E-01 | 5.00E-05 | 1.00E+00 | 2.85E-04 |
| Gas2_chr7           | 1   | 1   | 1   | 2   | 0.0  | 1.0 | 0.7 | 1.6  | 7.71E-01 | 1.65E-03 | 1.00E+00 | 6.61E-03 |
| Gas2l3_chr10        | 1   | 1   | 1   | 4   | 0.0  | 1.0 | 1.6 | 3.0  | 6.56E-01 | 5.00E-05 | 1.00E+00 | 2.72E-04 |
| Gata1_chrX          | 1   | 3   | 3   | 34  | 0.8  | 1.7 | 3.6 | 12.5 | 7.74E-02 | 5.00E-05 | 8.05E-01 | 2.85E-04 |
| Gatm_chr2           | 22  | 23  | 31  | 50  | 0.1  | 1.0 | 0.7 | 1.6  | 8.13E-01 | 5.00E-05 | 1.00E+00 | 2.85E-04 |
| Gca_chr2            | 3   | 3   | 4   | 9   | 0.0  | 1.0 | 1.4 | 2.6  | 9.89E-01 | 5.00E-05 | 1.00E+00 | 2.85E-04 |
| Gclm_chr3           | 7   | 11  | 13  | 89  | 0.6  | 1.5 | 2.8 | 7.0  | 4.66E-02 | 5.00E-05 | 8.39E-01 | 2.85E-04 |
| Gda_chr19           | 5   | 6   | 12  | 91  | 0.3  | 1.2 | 3.0 | 7.8  | 2.14E-01 | 5.00E-05 | 9.89E-01 | 2.85E-04 |
| Gdpc1_chr11         | 2   | 2   | 2   | 4   | 0.3  | 1.2 | 0.8 | 1.7  | 5.34E-01 | 5.00E-05 | 1.00E+00 | 2.85E-04 |
| Gen1_chr12          | 1   | 1   | 3   | 10  | -0.4 | 1.3 | 2.0 | 3.9  | 3.86E-01 | 5.00E-05 | 1.00E+00 | 2.85E-04 |
| Gfap_chr11          | 0   | 0   | 0   | 5   | 0.0  | 1.0 | 2.4 | 5.4  | 7.29E-01 | 5.00E-05 | 1.00E+00 | 2.85E-04 |
| Gfi1b_chr2          | 1   | 1   | 1   | 14  | 0.2  | 1.2 | 3.0 | 8.1  | 5.50E-01 | 5.00E-05 | 1.00E+00 | 2.92E-04 |
| Gla_chrX            | 1   | 1   | 1   | 2   | 0.0  | 1.0 | 0.7 | 1.6  | 9.46E-01 | 5.00E-05 | 1.00E+00 | 2.85E-04 |
| Glipr2_chr4         | 12  | 13  | 14  | 25  | 0.1  | 1.1 | 0.8 | 1.7  | 5.79E-01 | 5.00E-05 | 1.00E+00 | 2.85E-04 |
| Glrx_chr13          | 15  | 17  | 15  | 31  | 0.2  | 1.1 | 1.1 | 2.1  | 4.63E-01 | 5.00E-05 | 1.00E+00 | 2.85E-04 |
| Glrx5_chr12         | 9   | 14  | 11  | 47  | 0.6  | 1.6 | 2.1 | 4.4  | 3.72E-02 | 5.00E-05 | 7.78E-01 | 2.85E-04 |
| Gm4841_chr18        | 0   | 0   | 1   | 5   | 0.0  | 1.0 | 2.4 | 5.2  | 6.28E-01 | 5.00E-05 | 1.00E+00 | 2.85E-04 |
| Gm5150_chr3         | 4   | 5   | 5   | 13  | 0.2  | 1.1 | 1.5 | 2.8  | 7.07E-01 | 5.00E-05 | 1.00E+00 | 2.85E-04 |
| Gm5483_chr16        | 1   | 1   | 0   | 5   | 0.0  | 1.0 | 2.4 | 5.4  | 8.45E-01 | 5.00E-05 | 1.00E+00 | 2.85E-04 |
| Gm9733_chr3         | 4   | 4   | 3   | 8   | 0.1  | 1.1 | 1.2 | 2.4  | 8.42E-01 | 5.00E-05 | 1.00E+00 | 2.85E-04 |
| Gmnn_chr13          | 9   | 10  | 9   | 40  | 0.0  | 1.0 | 2.1 | 4.3  | 9.87E-01 | 5.00E-05 | 1.00E+00 | 2.85E-04 |
| Gp49a_chr10         | 2   | 1   | 2   | 13  | -0.4 | 1.3 | 2.7 | 6.5  | 4.32E-01 | 5.00E-05 | 1.00E+00 | 2.85E-04 |
| Gp5_chr16           | 1   | 3   | 3   | 5   | 1.1  | 2.1 | 0.9 | 1.9  | 8.14E-03 | 5.00E-05 | 4.32E-01 | 2.85E-04 |
| Gp9_chr6            | 2   | 2   | 2   | 6   | 0.3  | 1.2 | 1.8 | 3.4  | 5.95E-01 | 5.00E-05 | 1.00E+00 | 2.85E-04 |
| Gpc1_chr1           | 2   | 3   | 5   | 9   | 0.5  | 1.4 | 0.7 | 1.6  | 1.48E-01 | 5.00E-05 | 9.68E-01 | 2.85E-04 |
| Gpr141_chr13        | 7   | 5   | 10  | 25  | -0.4 | 1.3 | 1.4 | 2.6  | 1.07E-01 | 5.00E-05 | 9.38E-01 | 2.85E-04 |
| Gpr160_chr3         | 2   | 1   | 2   | 4   | -0.1 | 1.1 | 0.9 | 1.9  | 8.73E-01 | 6.25E-04 | 1.00E+00 | 2.75E-03 |
| Gpr97_chr8          | 1   | 1   | 1   | 5   | 0.0  | 1.0 | 2.1 | 4.3  | 9.49E-01 | 5.00E-05 | 1.00E+00 | 2.85E-04 |
| Gpsm2_chr3          | 1   | 1   | 2   | 21  | 0.3  | 1.2 | 3.4 | 10.8 | 6.93E-01 | 5.00E-05 | 1.00E+00 | 2.85E-04 |
| Gpx1_chr9           | 106 | 141 | 120 | 360 | 0.4  | 1.3 | 1.6 | 3.0  | 4.91E-02 | 5.00E-05 | 8.46E-01 | 2.85E-04 |
| Gpx3_chr11          | 27  | 28  | 32  | 56  | 0.1  | 1.1 | 0.8 | 1.8  | 7.39E-01 | 5.00E-05 | 1.00E+00 | 2.85E-04 |
| Grina_chr15         | 21  | 30  | 34  | 127 | 0.5  | 1.4 | 1.9 | 3.7  | 1.91E-02 | 5.00E-05 | 6.13E-01 | 2.85E-04 |
| Gsr_chr8            | 12  | 11  | 22  | 57  | -0.1 | 1.1 | 1.4 | 2.6  | 6.74E-01 | 5.00E-05 | 1.00E+00 | 2.85E-04 |
| Gsta3_chr1          | 4   | 4   | 4   | 6   | 0.0  | 1.0 | 0.6 | 1.5  | 9.08E-01 | 2.59E-03 | 1.00E+00 | 9.95E-03 |
| Gstm5_chr3          | 3   | 3   | 3   | 11  | -0.1 | 1.0 | 1.9 | 3.8  | 9.02E-01 | 5.00E-05 | 1.00E+00 | 2.85E-04 |
| Gtse1_chr15         | 1   | 1   | 2   | 11  | 0.4  | 1.3 | 2.7 | 6.4  | 9.00E-02 | 5.00E-05 | 9.27E-01 | 2.85E-04 |
| Gypa_chr8           | 5   | 10  | 5   | 301 | 0.9  | 1.9 | 5.8 | 55.0 | 2.06E-03 | 5.00E-05 | 1.42E-01 | 2.85E-04 |

|                   |     |     |     |     |      |     |     |      |          |          |          |          |
|-------------------|-----|-----|-----|-----|------|-----|-----|------|----------|----------|----------|----------|
| Gypc_chr18        | 13  | 16  | 19  | 69  | 0.3  | 1.2 | 1.8 | 3.6  | 1.82E-01 | 5.00E-05 | 9.86E-01 | 2.85E-04 |
| Gzmb_chr14        | 1   | 2   | 1   | 5   | 0.8  | 1.8 | 2.0 | 4.1  | 1.02E-01 | 5.00E-05 | 9.38E-01 | 2.85E-04 |
| H2-Q10_chr17      | 1   | 1   | 1   | 9   | 0.2  | 1.1 | 2.7 | 6.3  | 7.65E-01 | 5.00E-05 | 1.00E+00 | 2.85E-04 |
| H2afx_chr9        | 5   | 8   | 12  | 36  | 0.6  | 1.5 | 1.6 | 3.1  | 4.92E-02 | 5.00E-05 | 8.46E-01 | 2.85E-04 |
| H2afz_chr3        | 99  | 105 | 105 | 310 | 0.1  | 1.1 | 1.6 | 3.0  | 6.67E-01 | 5.00E-05 | 1.00E+00 | 2.85E-04 |
| Hagh_chr17        | 11  | 13  | 14  | 56  | 0.2  | 1.2 | 2.0 | 4.1  | 4.37E-01 | 5.00E-05 | 1.00E+00 | 2.85E-04 |
| Hbq1b_chr11       | 1   | 1   | 1   | 12  | 0.2  | 1.2 | 3.6 | 11.7 | 1.40E-01 | 5.00E-05 | 9.63E-01 | 2.85E-04 |
| Hdc_chr2          | 1   | 1   | 2   | 17  | 0.3  | 1.2 | 3.4 | 10.3 | 5.55E-01 | 5.00E-05 | 1.00E+00 | 2.85E-04 |
| Hemgn_chr4        | 1   | 3   | 3   | 160 | 1.2  | 2.4 | 5.9 | 59.4 | 3.65E-03 | 5.00E-05 | 2.17E-01 | 2.85E-04 |
| Hist2h2bb_chr3    | 1   | 1   | 0   | 4   | 0.0  | 1.0 | 1.9 | 3.7  | 6.21E-01 | 5.00E-05 | 1.00E+00 | 2.85E-04 |
| Hist3h2ba_chr11   | 1   | 1   | 1   | 2   | 0.1  | 1.1 | 0.7 | 1.6  | 6.97E-01 | 3.50E-04 | 1.00E+00 | 1.69E-03 |
| Hk3_chr13         | 5   | 5   | 8   | 24  | 0.0  | 1.0 | 1.6 | 2.9  | 8.87E-01 | 5.00E-05 | 1.00E+00 | 2.99E-04 |
| Hmgb2_chr8        | 37  | 40  | 39  | 247 | 0.1  | 1.1 | 2.7 | 6.3  | 7.08E-01 | 5.00E-05 | 1.00E+00 | 2.85E-04 |
| Hmgb3_chrX        | 6   | 8   | 8   | 46  | 0.2  | 1.2 | 2.6 | 6.0  | 4.18E-01 | 5.00E-05 | 1.00E+00 | 2.85E-04 |
| Hmgn2_chr4        | 71  | 92  | 82  | 220 | 0.4  | 1.3 | 1.4 | 2.7  | 6.96E-02 | 5.00E-05 | 8.82E-01 | 2.85E-04 |
| Hmmr_chr11        | 2   | 2   | 3   | 31  | -0.1 | 1.1 | 3.4 | 10.3 | 7.79E-01 | 5.00E-05 | 1.00E+00 | 2.85E-04 |
| Hnrnpll_chr17     | 8   | 7   | 11  | 20  | -0.1 | 1.1 | 0.9 | 1.8  | 7.76E-01 | 5.00E-05 | 1.00E+00 | 2.85E-04 |
| Hp_chr8           | 3   | 3   | 4   | 47  | -0.1 | 1.1 | 3.6 | 12.1 | 8.61E-01 | 5.00E-05 | 1.00E+00 | 2.85E-04 |
| Hpn_chr7          | 1   | 1   | 1   | 4   | 0.0  | 1.0 | 1.8 | 3.6  | 5.25E-01 | 5.00E-05 | 1.00E+00 | 2.85E-04 |
| Hsd11b1_chr1      | 13  | 14  | 3   | 8   | 0.0  | 1.0 | 1.6 | 3.0  | 7.09E-01 | 1.40E-03 | 1.00E+00 | 6.00E-03 |
| Iba57_chr11       | 2   | 2   | 4   | 11  | 0.2  | 1.2 | 1.7 | 3.2  | 4.56E-01 | 5.00E-05 | 1.00E+00 | 2.85E-04 |
| Icam4_chr9        | 0   | 0   | 0   | 8   | 0.0  | 1.0 | 3.0 | 8.0  | 7.97E-01 | 5.00E-05 | 1.00E+00 | 2.85E-04 |
| Ier3_chr17        | 1   | 1   | 1   | 2   | 0.1  | 1.0 | 1.0 | 1.9  | 6.14E-01 | 4.50E-04 | 1.00E+00 | 2.12E-03 |
| Iffi204_chr1      | 15  | 8   | 17  | 31  | -0.8 | 1.8 | 0.9 | 1.8  | 1.09E-03 | 5.00E-05 | 9.17E-02 | 2.85E-04 |
| Iffi44_chr3       | 1   | 1   | 1   | 10  | 0.4  | 1.3 | 3.3 | 9.6  | 1.93E-01 | 5.00E-05 | 9.87E-01 | 2.85E-04 |
| Ifitm1_chr7       | 17  | 12  | 1   | 9   | -0.5 | 1.4 | 3.2 | 9.5  | 1.42E-01 | 1.50E-04 | 9.67E-01 | 8.29E-04 |
| Ifitm2_chr7       | 41  | 41  | 34  | 58  | 0.0  | 1.0 | 0.8 | 1.7  | 9.60E-01 | 5.00E-05 | 1.00E+00 | 2.85E-04 |
| Ifitm3_chr7       | 45  | 59  | 40  | 88  | 0.4  | 1.3 | 1.1 | 2.2  | 9.48E-02 | 5.00E-05 | 9.27E-01 | 2.85E-04 |
| Ifitm6_chr7       | 7   | 11  | 5   | 38  | 0.6  | 1.5 | 3.0 | 8.0  | 1.34E-01 | 5.00E-05 | 9.56E-01 | 2.85E-04 |
| Ifrd2_chr9        | 6   | 9   | 12  | 54  | 0.5  | 1.4 | 2.2 | 4.5  | 9.47E-02 | 5.00E-05 | 9.27E-01 | 2.85E-04 |
| Igj_chr5          | 305 | 359 | 246 | 862 | 0.2  | 1.2 | 1.8 | 3.5  | 4.19E-01 | 5.00E-05 | 1.00E+00 | 2.85E-04 |
| Igsf6_chr7        | 19  | 18  | 25  | 50  | -0.1 | 1.0 | 1.0 | 2.0  | 7.93E-01 | 5.00E-05 | 1.00E+00 | 2.85E-04 |
| Il15ra_chr2       | 3   | 3   | 4   | 6   | -0.1 | 1.1 | 0.7 | 1.6  | 7.56E-01 | 5.75E-04 | 1.00E+00 | 2.51E-03 |
| Il18bp_chr7       | 7   | 8   | 9   | 15  | 0.2  | 1.1 | 0.7 | 1.6  | 6.12E-01 | 5.00E-05 | 1.00E+00 | 2.85E-04 |
| Il18rap_chr1      | 4   | 4   | 7   | 17  | 0.2  | 1.1 | 1.3 | 2.5  | 6.30E-01 | 5.00E-05 | 1.00E+00 | 2.85E-04 |
| Il1b_chr2         | 11  | 14  | 13  | 42  | 0.3  | 1.2 | 1.7 | 3.2  | 2.53E-01 | 5.00E-05 | 9.70E-01 | 2.85E-04 |
| Il1f9_chr2        | 1   | 1   | 1   | 8   | 0.0  | 1.0 | 2.9 | 7.3  | 9.18E-01 | 5.00E-05 | 1.00E+00 | 2.85E-04 |
| Il1r2_chr1        | 1   | 1   | 1   | 6   | 0.6  | 1.5 | 2.6 | 5.9  | 1.01E-01 | 5.00E-05 | 9.37E-01 | 2.85E-04 |
| Il1r11_chr1       | 1   | 1   | 1   | 4   | 0.0  | 1.0 | 2.2 | 4.5  | 9.66E-01 | 5.00E-05 | 1.00E+00 | 2.85E-04 |
| Il1rn_chr2        | 1   | 0   | 1   | 4   | 0.0  | 1.0 | 1.6 | 3.0  | 4.25E-01 | 5.00E-05 | 1.00E+00 | 2.49E-04 |
| Incenp_chr19      | 7   | 9   | 13  | 47  | 0.3  | 1.3 | 1.9 | 3.7  | 1.85E-01 | 5.00E-05 | 9.86E-01 | 2.85E-04 |
| Iqgap3_chr3       | 0   | 1   | 1   | 6   | 0.0  | 1.0 | 2.4 | 5.3  | 8.44E-01 | 5.00E-05 | 1.00E+00 | 2.85E-04 |
| Iscal1_chr13      | 31  | 40  | 54  | 170 | 0.4  | 1.3 | 1.7 | 3.2  | 8.55E-02 | 5.00E-05 | 9.18E-01 | 2.85E-04 |
| Isg15_chr4        | 6   | 9   | 4   | 47  | 0.6  | 1.5 | 3.5 | 10.9 | 1.10E-01 | 5.00E-05 | 9.38E-01 | 2.85E-04 |
| Isg20_chr7        | 17  | 24  | 16  | 81  | 0.4  | 1.4 | 2.4 | 5.2  | 1.86E-01 | 5.00E-05 | 9.73E-01 | 2.89E-04 |
| Itega2b_chr11     | 5   | 9   | 10  | 21  | 1.0  | 2.0 | 1.1 | 2.1  | 1.37E-04 | 5.00E-05 | 1.84E-02 | 2.85E-04 |
| Itegad_chr7       | 20  | 22  | 38  | 61  | 0.2  | 1.1 | 0.7 | 1.6  | 4.55E-01 | 5.00E-05 | 1.00E+00 | 2.85E-04 |
| Itegam_chr7       | 4   | 5   | 7   | 26  | 0.5  | 1.4 | 1.9 | 3.7  | 1.81E-01 | 5.00E-05 | 9.50E-01 | 2.92E-04 |
| Itegb2l_chr16     | 0   | 0   | 0   | 4   | 0.0  | 1.0 | 2.0 | 3.9  | 2.12E-01 | 5.00E-05 | 1.00E+00 | 2.85E-04 |
| Kcnj2_chr11       | 1   | 1   | 2   | 4   | 0.1  | 1.0 | 1.0 | 2.0  | 8.87E-01 | 5.00E-05 | 1.00E+00 | 2.85E-04 |
| Kel_chr6          | 1   | 1   | 1   | 65  | 0.3  | 1.2 | 5.7 | 50.7 | 2.63E-01 | 5.00E-05 | 9.74E-01 | 2.85E-04 |
| Kif11_chr19       | 3   | 4   | 6   | 62  | 0.1  | 1.0 | 3.4 | 10.3 | 8.29E-01 | 5.00E-05 | 1.00E+00 | 2.85E-04 |
| Kif14_chr1        | 0   | 0   | 1   | 8   | 0.0  | 1.0 | 3.0 | 7.8  | 6.10E-01 | 5.00E-05 | 1.00E+00 | 2.85E-04 |
| Kif15_chr9        | 2   | 2   | 4   | 22  | 0.1  | 1.0 | 2.7 | 6.4  | 8.40E-01 | 5.00E-05 | 1.00E+00 | 2.85E-04 |
| Kif18a_chr2       | 2   | 1   | 2   | 20  | -0.4 | 1.3 | 3.1 | 8.3  | 3.34E-01 | 5.00E-05 | 9.98E-01 | 2.85E-04 |
| Kif18b_chr11      | 1   | 1   | 2   | 20  | 0.1  | 1.1 | 3.6 | 11.7 | 2.31E-01 | 5.00E-05 | 9.91E-01 | 2.85E-04 |
| Kif22_chr7        | 2   | 3   | 4   | 32  | 0.5  | 1.4 | 3.0 | 8.0  | 1.86E-01 | 5.00E-05 | 9.86E-01 | 2.85E-04 |
| Kif23_chr9        | 4   | 4   | 6   | 27  | 0.0  | 1.0 | 2.2 | 4.4  | 9.75E-01 | 5.00E-05 | 1.00E+00 | 2.85E-04 |
| Kif24_chr4        | 1   | 1   | 1   | 5   | 0.0  | 1.0 | 2.1 | 4.3  | 8.02E-01 | 5.00E-05 | 1.00E+00 | 2.85E-04 |
| Kif2c_chr4        | 1   | 1   | 2   | 12  | 0.3  | 1.2 | 2.7 | 6.6  | 4.86E-01 | 5.00E-05 | 1.00E+00 | 2.85E-04 |
| Kif4_chrX         | 1   | 1   | 2   | 19  | 0.2  | 1.2 | 3.1 | 8.4  | 5.19E-01 | 5.00E-05 | 1.00E+00 | 2.85E-04 |
| Kifc1_chr17       | 2   | 2   | 3   | 23  | 0.4  | 1.4 | 2.8 | 7.0  | 2.73E-01 | 5.00E-05 | 9.94E-01 | 2.85E-04 |
| Kifc5b_chr17      | 1   | 2   | 3   | 9   | 0.2  | 1.2 | 1.8 | 3.5  | 5.97E-01 | 5.00E-05 | 1.00E+00 | 2.85E-04 |
| Klf1_chr8         | 1   | 2   | 2   | 56  | 0.5  | 1.4 | 4.5 | 23.3 | 3.59E-01 | 5.00E-05 | 9.94E-01 | 2.85E-04 |
| Klf5_chr14        | 0   | 0   | 1   | 2   | 0.0  | 1.0 | 1.1 | 2.1  | 7.31E-01 | 5.00E-05 | 1.00E+00 | 2.85E-04 |
| Klra2_chr6        | 4   | 4   | 4   | 16  | 0.1  | 1.1 | 2.0 | 4.0  | 8.36E-01 | 5.00E-05 | 1.00E+00 | 2.85E-04 |
| Knstrn_chr2       | 2   | 3   | 3   | 13  | 0.1  | 1.1 | 2.2 | 4.5  | 7.52E-01 | 5.00E-05 | 1.00E+00 | 2.85E-04 |
| Kntc1_chr5        | 1   | 1   | 1   | 14  | 0.0  | 1.0 | 3.3 | 9.6  | 3.71E-01 | 5.00E-05 | 1.00E+00 | 2.85E-04 |
| Kpna2_chr11       | 23  | 28  | 30  | 86  | 0.3  | 1.2 | 1.5 | 2.8  | 2.35E-01 | 5.00E-05 | 9.91E-01 | 2.85E-04 |
| Larp1b_chr3       | 6   | 6   | 7   | 14  | 0.1  | 1.1 | 1.0 | 2.0  | 7.88E-01 | 5.00E-05 | 1.00E+00 | 2.85E-04 |
| Lbp_chr2          | 0   | 0   | 1   | 3   | 0.0  | 1.0 | 1.7 | 3.2  | 6.64E-01 | 5.00E-05 | 1.00E+00 | 2.85E-04 |
| Lcn2_chr2         | 1   | 3   | 1   | 74  | 1.8  | 3.4 | 6.2 | 73.7 | 5.28E-04 | 5.00E-05 | 8.17E-02 | 2.85E-04 |
| Lgals3_chr14      | 11  | 15  | 10  | 28  | 0.4  | 1.3 | 1.6 | 2.9  | 2.24E-01 | 5.00E-05 | 9.53E-01 | 3.24E-04 |
| Lig1_chr7         | 6   | 9   | 11  | 42  | 0.6  | 1.5 | 1.9 | 3.7  | 3.11E-02 | 5.00E-05 | 7.48E-01 | 2.85E-04 |
| Lilrb4_chr10      | 12  | 8   | 14  | 36  | -0.7 | 1.6 | 1.4 | 2.6  | 2.07E-02 | 5.00E-05 | 6.41E-01 | 2.85E-04 |
| Lmna_chr3         | 3   | 4   | 9   | 32  | 0.3  | 1.2 | 1.8 | 3.6  | 5.02E-01 | 5.00E-05 | 1.00E+00 | 2.85E-04 |
| Lmnbl1_chr18      | 12  | 18  | 20  | 58  | 0.5  | 1.5 | 1.5 | 2.9  | 1.45E-02 | 5.00E-05 | 5.46E-01 | 2.85E-04 |
| LOC100038947_chr3 | 6   | 4   | 5   | 14  | -0.6 | 1.5 | 1.5 | 2.8  | 1.17E-01 | 5.00E-05 | 9.46E-01 | 2.85E-04 |
| Lrg1_chr17        | 3   | 5   | 4   | 29  | 0.8  | 1.7 | 2.8 | 6.9  | 4.34E-02 | 5.00E-05 | 8.14E-01 | 2.85E-04 |
| Lrr1_chr12        | 0   | 0   | 0   | 3   | 0.0  | 1.0 | 1.5 | 2.8  | 4.69E-01 | 5.00E-05 | 1.00E+00 | 2.85E-04 |
| Lrrc29_chr8       | 1   | 1   | 1   | 3   | 0.0  | 1.0 | 1.5 | 2.8  | 9.04E-01 | 5.00E-05 | 1.00E+00 | 2.85E-04 |

|                |    |    |    |     |      |     |     |      |          |          |          |          |
|----------------|----|----|----|-----|------|-----|-----|------|----------|----------|----------|----------|
| Ltb4r1_chr14   | 0  | 1  | 1  | 4   | 0.0  | 1.0 | 1.8 | 3.6  | 3.80E-01 | 5.00E-05 | 1.00E+00 | 2.85E-04 |
| Ltf_chr9       | 1  | 5  | 2  | 136 | 2.2  | 4.6 | 6.4 | 81.7 | 2.54E-09 | 5.00E-05 | 1.28E-06 | 2.85E-04 |
| Ly6c2_chr15    | 16 | 27 | 12 | 86  | 0.8  | 1.7 | 2.8 | 7.1  | 4.01E-03 | 5.00E-05 | 3.11E-01 | 2.85E-04 |
| Ly6i_chr15     | 0  | 0  | 0  | 2   | 0.0  | 1.0 | 0.8 | 1.7  | 7.16E-01 | 5.00E-05 | 1.00E+00 | 2.85E-04 |
| Mad2l1_chr6    | 9  | 9  | 10 | 40  | 0.0  | 1.0 | 2.0 | 4.1  | 9.45E-01 | 5.00E-05 | 1.00E+00 | 2.85E-04 |
| Mapk13_chr17   | 0  | 1  | 1  | 4   | 0.0  | 1.0 | 2.0 | 3.9  | 4.32E-01 | 5.00E-05 | 1.00E+00 | 2.85E-04 |
| March3_chr18   | 2  | 2  | 3  | 16  | 0.5  | 1.4 | 2.3 | 4.9  | 2.28E-01 | 5.00E-05 | 9.91E-01 | 2.85E-04 |
| March8_chr6    | 5  | 5  | 11 | 63  | 0.0  | 1.0 | 2.6 | 5.9  | 8.78E-01 | 5.00E-05 | 1.00E+00 | 2.85E-04 |
| Mastl_chr2     | 1  | 0  | 1  | 5   | 0.0  | 1.0 | 2.2 | 4.7  | 4.36E-01 | 5.00E-05 | 1.00E+00 | 2.85E-04 |
| Matn2_chr15    | 1  | 2  | 2  | 5   | 1.0  | 2.0 | 1.1 | 2.2  | 6.53E-03 | 5.00E-05 | 3.81E-01 | 2.85E-04 |
| Mboat2_chr12   | 1  | 0  | 1  | 6   | 0.0  | 1.0 | 2.6 | 5.9  | 4.47E-01 | 5.00E-05 | 1.00E+00 | 2.85E-04 |
| Mcomp1_chr8    | 4  | 5  | 4  | 13  | 0.2  | 1.1 | 1.6 | 3.1  | 6.84E-01 | 5.00E-05 | 1.00E+00 | 2.85E-04 |
| Mcm10_chr2     | 1  | 1  | 2  | 14  | 0.4  | 1.3 | 2.7 | 6.6  | 3.66E-01 | 5.00E-05 | 9.97E-01 | 2.85E-04 |
| Mcm2_chr6      | 9  | 12 | 19 | 68  | 0.4  | 1.4 | 1.8 | 3.5  | 5.15E-02 | 5.00E-05 | 8.48E-01 | 2.85E-04 |
| Mcm5_chr8      | 10 | 15 | 19 | 58  | 0.5  | 1.4 | 1.6 | 3.0  | 1.74E-02 | 5.00E-05 | 5.92E-01 | 2.85E-04 |
| Mcm7_chr5      | 15 | 20 | 25 | 80  | 0.4  | 1.3 | 1.7 | 3.2  | 7.95E-02 | 5.00E-05 | 9.08E-01 | 2.85E-04 |
| Mcph1_chr8     | 2  | 2  | 3  | 8   | 0.1  | 1.0 | 1.4 | 2.6  | 8.69E-01 | 5.00E-05 | 1.00E+00 | 2.85E-04 |
| Megf9_chr4     | 2  | 2  | 4  | 10  | 0.1  | 1.1 | 1.4 | 2.6  | 8.29E-01 | 5.00E-05 | 1.00E+00 | 2.85E-04 |
| Melk_chr4      | 1  | 1  | 2  | 7   | 0.0  | 1.0 | 2.2 | 4.6  | 9.43E-01 | 5.00E-05 | 1.00E+00 | 2.85E-04 |
| Memo1_chr17    | 14 | 14 | 19 | 76  | 0.0  | 1.0 | 2.0 | 4.0  | 9.54E-01 | 5.00E-05 | 1.00E+00 | 2.85E-04 |
| Metap2_chr10   | 16 | 17 | 19 | 87  | 0.1  | 1.1 | 2.2 | 4.6  | 6.50E-01 | 5.00E-05 | 1.00E+00 | 2.85E-04 |
| Mfsd2b_chr12   | 3  | 4  | 6  | 40  | 0.4  | 1.3 | 2.6 | 6.1  | 2.37E-01 | 5.00E-05 | 9.68E-01 | 2.85E-04 |
| Mfsd9_chr1     | 1  | 1  | 1  | 3   | 0.0  | 1.0 | 1.3 | 2.4  | 7.01E-01 | 5.00E-05 | 1.00E+00 | 2.85E-04 |
| Mgst1_chr6     | 16 | 15 | 14 | 40  | -0.1 | 1.1 | 1.5 | 2.8  | 7.22E-01 | 5.00E-05 | 1.00E+00 | 2.85E-04 |
| Mgst2_chr3     | 3  | 2  | 2  | 5   | -0.2 | 1.2 | 1.2 | 2.3  | 6.72E-01 | 5.00E-05 | 1.00E+00 | 2.85E-04 |
| Mgst3_chr1     | 2  | 3  | 2  | 36  | 0.5  | 1.4 | 4.3 | 19.2 | 3.98E-01 | 5.00E-05 | 1.00E+00 | 2.85E-04 |
| Micall2_chr5   | 2  | 2  | 3  | 12  | 0.4  | 1.3 | 1.8 | 3.5  | 2.51E-01 | 5.00E-05 | 9.92E-01 | 2.85E-04 |
| Minpp1_chr19   | 8  | 9  | 15 | 43  | 0.3  | 1.2 | 1.6 | 2.9  | 3.04E-01 | 5.00E-05 | 9.96E-01 | 2.85E-04 |
| Mir22hg_chr11  | 5  | 5  | 6  | 11  | 0.1  | 1.1 | 0.8 | 1.8  | 8.08E-01 | 5.00E-05 | 1.00E+00 | 2.82E-04 |
| Mis18bp1_chr12 | 2  | 1  | 3  | 18  | -0.2 | 1.2 | 2.9 | 7.3  | 5.22E-01 | 5.00E-05 | 1.00E+00 | 2.85E-04 |
| Mki67_chr7     | 8  | 9  | 16 | 228 | 0.2  | 1.2 | 3.8 | 14.1 | 3.04E-01 | 5.00E-05 | 9.86E-01 | 2.85E-04 |
| Mkrr1_chr6     | 35 | 58 | 72 | 180 | 0.7  | 1.6 | 1.3 | 2.5  | 6.42E-04 | 5.00E-05 | 9.50E-02 | 2.85E-04 |
| Mkl1_chr8      | 2  | 2  | 3  | 7   | 0.0  | 1.0 | 1.2 | 2.4  | 9.73E-01 | 5.00E-05 | 1.00E+00 | 2.85E-04 |
| Mmp19_chr10    | 1  | 1  | 1  | 2   | 0.0  | 1.0 | 0.9 | 1.8  | 6.89E-01 | 1.15E-03 | 1.00E+00 | 4.86E-03 |
| Mmp25_chr17    | 0  | 0  | 1  | 6   | 0.0  | 1.0 | 2.6 | 6.1  | 3.86E-01 | 5.00E-05 | 1.00E+00 | 2.85E-04 |
| Mmp3_chr9      | 1  | 1  | 1  | 2   | 0.4  | 1.3 | 0.7 | 1.6  | 3.72E-01 | 2.00E-03 | 1.00E+00 | 7.82E-03 |
| Mmp8_chr9      | 1  | 1  | 1  | 31  | 0.0  | 1.0 | 4.7 | 26.5 | 6.74E-01 | 5.00E-05 | 1.00E+00 | 2.85E-04 |
| Mmp9_chr2      | 2  | 3  | 5  | 36  | 0.5  | 1.4 | 2.7 | 6.7  | 1.48E-01 | 5.00E-05 | 9.69E-01 | 2.85E-04 |
| Mms22l_chr4    | 3  | 3  | 4  | 10  | 0.0  | 1.0 | 1.2 | 2.4  | 9.84E-01 | 5.00E-05 | 1.00E+00 | 2.85E-04 |
| Mnda_chr1      | 2  | 2  | 3  | 9   | 0.0  | 1.0 | 1.7 | 3.3  | 9.92E-01 | 5.00E-05 | 1.00E+00 | 2.85E-04 |
| Mns1_chr9      | 1  | 2  | 2  | 26  | 0.7  | 1.6 | 3.7 | 12.6 | 3.03E-01 | 5.00E-05 | 9.96E-01 | 2.85E-04 |
| Mocos_chr18    | 1  | 1  | 1  | 3   | 0.0  | 1.0 | 1.1 | 2.1  | 9.52E-01 | 5.00E-05 | 1.00E+00 | 2.85E-04 |
| Mpo_chr11      | 0  | 2  | 1  | 65  | 1.0  | 2.0 | 5.9 | 61.4 | 3.90E-05 | 5.00E-05 | 6.01E-03 | 2.85E-04 |
| Mpp1_chrX      | 17 | 21 | 25 | 62  | 0.3  | 1.3 | 1.3 | 2.5  | 2.85E-01 | 5.00E-05 | 9.95E-01 | 2.85E-04 |
| Mpp2_chr11     | 1  | 1  | 2  | 9   | 0.0  | 1.0 | 2.5 | 5.6  | 5.57E-01 | 5.00E-05 | 1.00E+00 | 2.85E-04 |
| Ms4a3_chr19    | 0  | 0  | 0  | 12  | 0.0  | 1.0 | 3.6 | 12.2 | 8.83E-02 | 5.00E-05 | 1.00E+00 | 2.85E-04 |
| Ms4a4d_chr19   | 3  | 4  | 3  | 10  | 0.6  | 1.5 | 1.8 | 3.5  | 1.51E-01 | 5.00E-05 | 9.71E-01 | 2.85E-04 |
| Ms4a6d_chr19   | 7  | 4  | 7  | 17  | -0.6 | 1.5 | 1.3 | 2.5  | 1.08E-01 | 5.00E-05 | 8.52E-01 | 2.85E-04 |
| Ms4a8a_chr19   | 0  | 1  | 0  | 2   | 0.0  | 1.0 | 0.6 | 1.5  | 1.06E-01 | 5.00E-05 | 9.38E-01 | 2.85E-04 |
| Msantd3_chr4   | 1  | 1  | 1  | 2   | 0.0  | 1.0 | 0.9 | 1.8  | 8.43E-01 | 5.00E-05 | 1.00E+00 | 2.70E-04 |
| Msrbl1_chr17   | 18 | 21 | 18 | 52  | 0.2  | 1.2 | 1.6 | 2.9  | 4.47E-01 | 5.00E-05 | 1.00E+00 | 2.85E-04 |
| Mt1_chr8       | 6  | 7  | 6  | 15  | 0.1  | 1.1 | 1.4 | 2.7  | 8.67E-01 | 5.00E-05 | 1.00E+00 | 2.85E-04 |
| Mt2_chr8       | 3  | 3  | 2  | 9   | -0.1 | 1.1 | 2.2 | 4.4  | 8.03E-01 | 5.00E-05 | 1.00E+00 | 2.85E-04 |
| Mtftp1_chr11   | 1  | 1  | 2  | 4   | 0.3  | 1.2 | 1.4 | 2.7  | 6.16E-01 | 5.00E-05 | 1.00E+00 | 2.85E-04 |
| Mtfr2_chr10    | 1  | 1  | 1  | 6   | 0.0  | 1.0 | 2.6 | 6.0  | 8.50E-01 | 5.00E-05 | 1.00E+00 | 2.85E-04 |
| Mthfd2_chr6    | 8  | 11 | 12 | 27  | 0.4  | 1.4 | 1.2 | 2.2  | 8.38E-02 | 5.00E-05 | 9.17E-01 | 2.85E-04 |
| Mtus1_chr8     | 4  | 4  | 7  | 11  | 0.2  | 1.2 | 0.7 | 1.6  | 4.46E-01 | 1.00E-04 | 1.00E+00 | 4.95E-04 |
| Mvb12b_chr2    | 3  | 3  | 7  | 13  | 0.0  | 1.0 | 0.9 | 1.8  | 9.41E-01 | 5.00E-05 | 1.00E+00 | 2.85E-04 |
| Mxd1_chr6      | 7  | 8  | 14 | 56  | 0.1  | 1.1 | 2.0 | 4.0  | 5.34E-01 | 5.00E-05 | 1.00E+00 | 2.85E-04 |
| Mybl2_chr2     | 1  | 2  | 3  | 22  | 0.2  | 1.2 | 3.0 | 8.1  | 5.77E-01 | 5.00E-05 | 1.00E+00 | 2.85E-04 |
| Myh10_chr11    | 2  | 2  | 4  | 18  | 0.2  | 1.2 | 2.2 | 4.6  | 4.38E-01 | 5.00E-05 | 1.00E+00 | 2.85E-04 |
| Mylk3_chr8     | 5  | 6  | 9  | 19  | 0.4  | 1.3 | 1.0 | 2.0  | 1.22E-01 | 5.00E-05 | 9.50E-01 | 2.85E-04 |
| Myo1d_chr11    | 2  | 2  | 5  | 10  | 0.1  | 1.1 | 0.8 | 1.8  | 7.00E-01 | 5.00E-05 | 1.00E+00 | 2.85E-04 |
| Nanp_chr2      | 7  | 8  | 8  | 18  | 0.3  | 1.2 | 1.2 | 2.3  | 3.79E-01 | 5.00E-05 | 1.00E+00 | 2.85E-04 |
| Naprt_chr15    | 1  | 1  | 1  | 5   | 0.2  | 1.1 | 1.9 | 3.7  | 2.40E-01 | 5.00E-05 | 9.92E-01 | 2.85E-04 |
| Ncapd2_chr6    | 5  | 10 | 11 | 66  | 0.9  | 1.9 | 2.6 | 6.0  | 4.69E-05 | 5.00E-05 | 1.08E-02 | 2.85E-04 |
| Ncapd3_chr9    | 8  | 7  | 13 | 32  | -0.1 | 1.1 | 1.3 | 2.4  | 6.07E-01 | 5.00E-05 | 1.00E+00 | 2.85E-04 |
| Ncapg_chr5     | 2  | 2  | 4  | 33  | 0.0  | 1.0 | 3.2 | 9.2  | 9.71E-01 | 5.00E-05 | 1.00E+00 | 2.85E-04 |
| Ncapg2_chr12   | 4  | 3  | 7  | 36  | -0.3 | 1.2 | 2.4 | 5.4  | 2.15E-01 | 5.00E-05 | 9.89E-01 | 2.85E-04 |
| Ncaph_chr2     | 2  | 3  | 4  | 22  | 0.5  | 1.4 | 2.6 | 6.2  | 1.85E-01 | 5.00E-05 | 9.86E-01 | 2.85E-04 |
| Ndc80_chr17    | 4  | 4  | 5  | 19  | 0.1  | 1.1 | 1.9 | 3.8  | 6.92E-01 | 5.00E-05 | 1.00E+00 | 2.85E-04 |
| Neil3_chr8     | 1  | 1  | 1  | 21  | 0.2  | 1.1 | 3.9 | 14.7 | 7.12E-01 | 5.00E-05 | 1.00E+00 | 2.85E-04 |
| Nek2_chr1      | 2  | 2  | 3  | 19  | 0.4  | 1.3 | 2.8 | 6.7  | 3.53E-01 | 5.00E-05 | 9.98E-01 | 2.85E-04 |
| Neto2_chr8     | 1  | 1  | 1  | 2   | 0.0  | 1.0 | 0.8 | 1.8  | 4.15E-01 | 5.00E-05 | 1.00E+00 | 2.85E-04 |
| Nfe2_chr15     | 2  | 4  | 4  | 44  | 0.6  | 1.5 | 3.5 | 11.2 | 1.23E-01 | 5.00E-05 | 9.50E-01 | 2.85E-04 |
| Nfil3_chr13    | 1  | 1  | 1  | 3   | 0.6  | 1.5 | 1.3 | 2.4  | 9.28E-02 | 5.00E-05 | 9.27E-01 | 2.85E-04 |
| Ngp_chr9       | 4  | 16 | 4  | 325 | 2.1  | 4.2 | 6.4 | 82.4 | 2.64E-10 | 5.00E-05 | 1.73E-07 | 2.85E-04 |
| Nhs12_chrX     | 1  | 1  | 2  | 4   | 0.0  | 1.0 | 0.9 | 1.9  | 8.52E-01 | 5.00E-05 | 1.00E+00 | 2.85E-04 |
| Ninl_chr2      | 1  | 1  | 2  | 6   | 0.0  | 1.0 | 1.9 | 3.7  | 7.94E-01 | 5.00E-05 | 1.00E+00 | 2.85E-04 |
| Nipa1_chr7     | 2  | 2  | 3  | 12  | 0.1  | 1.1 | 2.2 | 4.5  | 8.26E-01 | 5.00E-05 | 1.00E+00 | 2.85E-04 |
| Nlrp12_chr7    | 0  | 0  | 1  | 4   | 0.0  | 1.0 | 2.1 | 4.4  | 8.30E-01 | 5.00E-05 | 1.00E+00 | 2.85E-04 |

|               |    |    |    |     |      |     |     |      |          |          |          |          |
|---------------|----|----|----|-----|------|-----|-----|------|----------|----------|----------|----------|
| Nlrx1_chr9    | 1  | 3  | 4  | 7   | 0.8  | 1.8 | 1.0 | 1.9  | 5.51E-02 | 1.25E-04 | 8.15E-01 | 6.73E-04 |
| Nme4_chr17    | 2  | 2  | 2  | 4   | -0.1 | 1.0 | 1.0 | 2.0  | 9.07E-01 | 5.00E-05 | 1.00E+00 | 2.85E-04 |
| Nmnat3_chr9   | 1  | 1  | 2  | 9   | 0.1  | 1.1 | 2.2 | 4.6  | 8.45E-01 | 5.00E-05 | 1.00E+00 | 2.85E-04 |
| Nqo1_chr8     | 1  | 1  | 1  | 5   | 0.2  | 1.2 | 2.2 | 4.6  | 5.16E-01 | 5.00E-05 | 1.00E+00 | 2.85E-04 |
| Nrip3_chr7    | 0  | 0  | 0  | 3   | 0.0  | 1.0 | 1.3 | 2.5  | 7.70E-01 | 5.00E-05 | 1.00E+00 | 2.85E-04 |
| Nsl1_chr1     | 3  | 3  | 4  | 10  | 0.1  | 1.1 | 1.4 | 2.7  | 7.65E-01 | 5.00E-05 | 1.00E+00 | 2.85E-04 |
| Nudt12_chr17  | 1  | 0  | 1  | 2   | 0.0  | 1.0 | 1.1 | 2.2  | 7.07E-01 | 5.00E-05 | 1.00E+00 | 2.85E-04 |
| Nudt4_chr10   | 16 | 15 | 23 | 69  | 0.0  | 1.0 | 1.5 | 2.9  | 8.54E-01 | 5.00E-05 | 1.00E+00 | 2.85E-04 |
| Nuf2_chr1     | 2  | 2  | 2  | 20  | 0.3  | 1.2 | 3.0 | 8.1  | 4.40E-01 | 5.00E-05 | 1.00E+00 | 2.85E-04 |
| Nxpe2_chr9    | 2  | 6  | 3  | 65  | 1.7  | 3.3 | 4.6 | 25.0 | 9.84E-09 | 5.00E-05 | 7.84E-06 | 2.85E-04 |
| Nxpe5_chr5    | 0  | 1  | 1  | 6   | 0.0  | 1.0 | 2.7 | 6.4  | 6.82E-02 | 5.00E-05 | 8.77E-01 | 2.85E-04 |
| Oaf_chr9      | 1  | 1  | 2  | 5   | 0.0  | 1.0 | 1.7 | 3.3  | 9.01E-01 | 5.00E-05 | 1.00E+00 | 2.85E-04 |
| Oas1g_chr5    | 0  | 0  | 0  | 3   | 0.0  | 1.0 | 1.4 | 2.7  | 9.58E-02 | 5.00E-05 | 1.00E+00 | 2.85E-04 |
| Oas3_chr5     | 1  | 2  | 2  | 30  | 0.7  | 1.6 | 4.0 | 15.5 | 1.00E-02 | 5.00E-05 | 4.64E-01 | 2.85E-04 |
| Oasl2_chr5    | 2  | 3  | 3  | 15  | 0.7  | 1.7 | 2.3 | 5.0  | 3.66E-02 | 5.00E-05 | 7.72E-01 | 2.85E-04 |
| Odc1_chr12    | 26 | 34 | 41 | 158 | 0.4  | 1.3 | 2.0 | 3.9  | 6.33E-02 | 5.00E-05 | 8.76E-01 | 2.85E-04 |
| Olfm4_chr14   | 0  | 0  | 0  | 2   | 0.0  | 1.0 | 1.0 | 1.9  | 1.43E-01 | 5.00E-05 | 1.00E+00 | 2.85E-04 |
| Oosp1_chr19   | 2  | 2  | 1  | 4   | 0.2  | 1.1 | 2.1 | 4.3  | 7.39E-01 | 5.00E-05 | 1.00E+00 | 2.85E-04 |
| Optn_chr2     | 5  | 5  | 8  | 23  | 0.0  | 1.0 | 1.5 | 2.9  | 8.68E-01 | 5.00E-05 | 1.00E+00 | 2.85E-04 |
| Orc1_chr4     | 0  | 1  | 1  | 10  | 0.0  | 1.0 | 3.3 | 9.9  | 7.72E-01 | 5.00E-05 | 1.00E+00 | 2.85E-04 |
| Orm1_chr4     | 0  | 0  | 0  | 2   | 0.0  | 1.0 | 1.2 | 2.4  | 5.70E-01 | 1.00E-04 | 1.00E+00 | 5.44E-04 |
| Osbp1a_chr18  | 2  | 2  | 2  | 5   | 0.1  | 1.1 | 1.1 | 2.1  | 8.62E-01 | 5.00E-05 | 1.00E+00 | 2.85E-04 |
| Otub2_chr12   | 2  | 2  | 3  | 10  | 0.3  | 1.2 | 1.8 | 3.5  | 5.22E-01 | 5.00E-05 | 1.00E+00 | 2.85E-04 |
| P2ry1_chr3    | 1  | 1  | 2  | 5   | 0.3  | 1.2 | 1.6 | 3.0  | 3.25E-01 | 5.00E-05 | 9.98E-01 | 2.85E-04 |
| Padi4_chr4    | 0  | 0  | 0  | 6   | 0.0  | 1.0 | 2.7 | 6.3  | 9.65E-03 | 5.00E-05 | 4.58E-01 | 2.85E-04 |
| Paqr9_chr9    | 5  | 7  | 12 | 39  | 0.4  | 1.3 | 1.7 | 3.3  | 1.82E-01 | 5.00E-05 | 9.86E-01 | 2.85E-04 |
| Parpbp_chr10  | 1  | 1  | 1  | 7   | 0.0  | 1.0 | 2.8 | 7.0  | 9.95E-01 | 5.00E-05 | 1.00E+00 | 2.85E-04 |
| Parvb_chr15   | 6  | 8  | 14 | 35  | 0.5  | 1.4 | 1.3 | 2.5  | 4.69E-02 | 5.00E-05 | 8.39E-01 | 2.85E-04 |
| Pask_chr1     | 0  | 0  | 1  | 5   | 0.0  | 1.0 | 2.4 | 5.3  | 8.44E-01 | 5.00E-05 | 1.00E+00 | 2.85E-04 |
| Pbk_chr14     | 2  | 2  | 2  | 18  | 0.0  | 1.0 | 3.2 | 9.4  | 9.84E-01 | 5.00E-05 | 1.00E+00 | 2.85E-04 |
| Pck2_chr14    | 8  | 10 | 15 | 30  | 0.4  | 1.3 | 1.0 | 2.0  | 1.10E-01 | 5.00E-05 | 9.38E-01 | 2.85E-04 |
| Pcx_chr19     | 1  | 1  | 2  | 9   | 0.1  | 1.1 | 1.9 | 3.8  | 4.33E-01 | 5.00E-05 | 1.00E+00 | 2.85E-04 |
| Pcyt1a_chr16  | 7  | 7  | 12 | 34  | 0.2  | 1.2 | 1.5 | 2.8  | 3.82E-01 | 5.00E-05 | 1.00E+00 | 2.85E-04 |
| Pcyt1b_chrX   | 0  | 1  | 1  | 8   | 0.0  | 1.0 | 2.9 | 7.5  | 2.54E-01 | 2.34E-03 | 9.70E-01 | 9.00E-03 |
| Pde7b_chr10   | 0  | 0  | 1  | 3   | 0.0  | 1.0 | 1.4 | 2.6  | 9.68E-01 | 5.00E-05 | 1.00E+00 | 2.85E-04 |
| Pdgfc_chr3    | 1  | 1  | 1  | 3   | 0.0  | 1.0 | 1.2 | 2.3  | 9.41E-01 | 5.00E-05 | 1.00E+00 | 2.85E-04 |
| Pdzk1ip1_chr4 | 1  | 1  | 1  | 11  | 0.4  | 1.3 | 3.5 | 11.3 | 3.20E-01 | 5.63E-04 | 1.00E+00 | 2.51E-03 |
| Pf4_chr5      | 16 | 22 | 12 | 25  | 0.5  | 1.4 | 1.1 | 2.1  | 1.32E-01 | 5.00E-05 | 9.56E-01 | 2.85E-04 |
| Pglyrp1_chr7  | 8  | 11 | 6  | 26  | 0.5  | 1.4 | 2.2 | 4.6  | 1.79E-01 | 5.00E-05 | 9.84E-01 | 2.85E-04 |
| Phyhip_chr14  | 0  | 0  | 0  | 10  | 0.0  | 1.0 | 3.3 | 9.7  | 2.02E-01 | 5.00E-05 | 1.00E+00 | 2.85E-04 |
| Pi16_chr17    | 1  | 1  | 2  | 10  | 0.0  | 1.0 | 2.5 | 5.7  | 9.65E-01 | 5.00E-05 | 1.00E+00 | 2.85E-04 |
| Pi4k2b_chr5   | 3  | 3  | 4  | 17  | -0.1 | 1.1 | 2.1 | 4.2  | 7.43E-01 | 5.00E-05 | 1.00E+00 | 2.85E-04 |
| Pif1_chr9     | 1  | 1  | 1  | 8   | 0.0  | 1.0 | 3.0 | 7.9  | 6.55E-01 | 5.00E-05 | 1.00E+00 | 2.85E-04 |
| Pigq_chr17    | 14 | 17 | 28 | 118 | 0.3  | 1.3 | 2.1 | 4.2  | 1.16E-01 | 5.00E-05 | 9.45E-01 | 2.85E-04 |
| Pik3r6_chr11  | 1  | 1  | 2  | 4   | -0.1 | 1.1 | 1.0 | 2.0  | 6.47E-01 | 7.50E-05 | 1.00E+00 | 4.25E-04 |
| Pilra_chr5    | 7  | 7  | 9  | 19  | 0.0  | 1.0 | 1.1 | 2.1  | 9.25E-01 | 5.00E-05 | 1.00E+00 | 2.85E-04 |
| Pilrb1_chr5   | 7  | 8  | 8  | 17  | 0.2  | 1.2 | 1.1 | 2.2  | 5.28E-01 | 5.00E-05 | 1.00E+00 | 2.85E-04 |
| Pilrb2_chr5   | 5  | 5  | 6  | 13  | 0.1  | 1.0 | 1.1 | 2.2  | 8.68E-01 | 5.00E-05 | 1.00E+00 | 2.85E-04 |
| Pip5k1b_chr19 | 1  | 2  | 2  | 12  | 0.4  | 1.3 | 2.6 | 6.2  | 4.72E-01 | 5.00E-05 | 1.00E+00 | 2.85E-04 |
| Pkhd11l_chr15 | 0  | 0  | 0  | 11  | 0.0  | 1.0 | 3.4 | 10.6 | 2.57E-02 | 5.00E-05 | 1.00E+00 | 2.85E-04 |
| PKlr_chr3     | 1  | 1  | 1  | 12  | 0.3  | 1.3 | 2.8 | 6.8  | 4.74E-01 | 8.21E-03 | 1.00E+00 | 2.40E-02 |
| Pla2g4c_chr7  | 0  | 0  | 0  | 4   | 0.0  | 1.0 | 2.0 | 4.1  | 9.40E-01 | 5.00E-05 | 1.00E+00 | 2.85E-04 |
| Plek2_chr12   | 0  | 0  | 0  | 5   | 0.0  | 1.0 | 2.3 | 5.0  | 5.70E-01 | 5.00E-05 | 1.00E+00 | 2.85E-04 |
| Plk1_chr7     | 1  | 3  | 3  | 23  | 0.8  | 1.7 | 2.9 | 7.5  | 5.32E-02 | 5.00E-05 | 8.48E-01 | 2.85E-04 |
| Plk4_chr3     | 4  | 4  | 6  | 24  | -0.1 | 1.1 | 2.0 | 3.9  | 7.69E-01 | 5.00E-05 | 1.00E+00 | 2.85E-04 |
| Pls1_chr9     | 1  | 1  | 2  | 4   | 0.3  | 1.3 | 1.2 | 2.2  | 1.60E-01 | 5.00E-05 | 9.78E-01 | 2.85E-04 |
| Plscr1_chr9   | 4  | 4  | 5  | 11  | 0.0  | 1.0 | 1.1 | 2.1  | 8.81E-01 | 5.00E-05 | 1.00E+00 | 2.85E-04 |
| Pmf1_chr3     | 5  | 8  | 7  | 16  | 0.5  | 1.4 | 1.2 | 2.3  | 1.80E-01 | 5.00E-05 | 9.85E-01 | 2.85E-04 |
| Pnp_chr14     | 8  | 14 | 8  | 41  | 0.8  | 1.7 | 2.3 | 4.9  | 1.17E-03 | 5.00E-05 | 1.39E-01 | 2.85E-04 |
| Pnp2_chr14    | 0  | 1  | 0  | 9   | 0.0  | 1.0 | 3.2 | 9.4  | 2.99E-01 | 5.00E-05 | 9.96E-01 | 2.85E-04 |
| Pnpo_chr11    | 8  | 14 | 14 | 42  | 0.7  | 1.6 | 1.5 | 2.9  | 4.66E-03 | 5.00E-05 | 3.39E-01 | 2.85E-04 |
| Poc1a_chr9    | 1  | 1  | 2  | 5   | 0.1  | 1.1 | 1.5 | 2.9  | 7.12E-01 | 5.00E-05 | 1.00E+00 | 2.85E-04 |
| Pole_chr5     | 2  | 3  | 4  | 15  | 0.3  | 1.2 | 1.8 | 3.5  | 2.80E-01 | 5.00E-05 | 9.94E-01 | 2.85E-04 |
| Pole3_chr4    | 8  | 8  | 11 | 22  | 0.0  | 1.0 | 1.0 | 2.0  | 9.16E-01 | 5.00E-05 | 1.00E+00 | 2.85E-04 |
| Polq_chr16    | 1  | 1  | 2  | 8   | 0.0  | 1.0 | 2.0 | 4.1  | 9.58E-01 | 5.00E-05 | 1.00E+00 | 2.85E-04 |
| Pon3_chr6     | 5  | 4  | 7  | 15  | -0.2 | 1.2 | 1.0 | 2.1  | 4.93E-01 | 5.00E-05 | 1.00E+00 | 2.85E-04 |
| Ppapdc1b_chr8 | 3  | 5  | 5  | 12  | 0.4  | 1.4 | 1.4 | 2.6  | 2.30E-01 | 5.00E-05 | 9.91E-01 | 2.85E-04 |
| Ppbp_chr5     | 46 | 68 | 49 | 112 | 0.5  | 1.5 | 1.2 | 2.3  | 1.32E-02 | 5.00E-05 | 5.25E-01 | 2.85E-04 |
| Ppox_chr1     | 10 | 12 | 14 | 46  | 0.3  | 1.2 | 1.7 | 3.2  | 2.67E-01 | 5.00E-05 | 9.94E-01 | 2.85E-04 |
| Ppp1r15a_chr7 | 8  | 9  | 13 | 81  | 0.3  | 1.2 | 2.7 | 6.3  | 2.65E-01 | 5.00E-05 | 9.94E-01 | 2.85E-04 |
| Ppp1r3b_chr8  | 1  | 2  | 2  | 4   | 0.3  | 1.2 | 0.7 | 1.6  | 4.35E-01 | 5.00E-05 | 1.00E+00 | 2.85E-04 |
| Ppp1r3d_chr2  | 1  | 1  | 1  | 4   | 0.0  | 1.0 | 1.9 | 3.9  | 6.36E-01 | 5.00E-05 | 1.00E+00 | 2.85E-04 |
| Pram1_chr17   | 2  | 3  | 4  | 20  | 0.6  | 1.5 | 2.4 | 5.2  | 1.28E-01 | 5.00E-05 | 9.50E-01 | 2.85E-04 |
| Prc1_chr7     | 3  | 3  | 4  | 41  | 0.2  | 1.2 | 3.2 | 9.1  | 5.14E-01 | 5.00E-05 | 1.00E+00 | 2.85E-04 |
| Prdx2_chr8    | 41 | 59 | 43 | 227 | 0.5  | 1.5 | 2.4 | 5.2  | 1.40E-02 | 5.00E-05 | 5.34E-01 | 2.85E-04 |
| Prdx4_chrX    | 11 | 10 | 9  | 27  | -0.1 | 1.1 | 1.5 | 2.8  | 7.38E-01 | 5.00E-05 | 1.00E+00 | 2.85E-04 |
| Prdx5_chr19   | 32 | 36 | 31 | 64  | 0.1  | 1.1 | 1.0 | 2.1  | 5.55E-01 | 5.00E-05 | 1.00E+00 | 2.85E-04 |
| Prg2_chr2     | 1  | 9  | 1  | 51  | 2.6  | 6.0 | 5.2 | 36.9 | 4.89E-08 | 5.00E-05 | 1.76E-05 | 2.85E-04 |
| Prg3_chr2     | 1  | 1  | 1  | 4   | 0.3  | 1.2 | 2.1 | 4.3  | 5.69E-01 | 5.00E-05 | 1.00E+00 | 2.85E-04 |
| Prim1_chr10   | 7  | 7  | 7  | 25  | 0.0  | 1.0 | 1.9 | 3.7  | 9.73E-01 | 5.00E-05 | 1.00E+00 | 2.85E-04 |
| Prim2_chr1    | 4  | 5  | 7  | 17  | 0.3  | 1.2 | 1.3 | 2.4  | 3.83E-01 | 5.00E-05 | 1.00E+00 | 2.85E-04 |

|                 |    |    |    |       |      |     |     |      |          |          |          |          |
|-----------------|----|----|----|-------|------|-----|-----|------|----------|----------|----------|----------|
| Prkar2b_chr12   | 6  | 7  | 9  | 39    | 0.2  | 1.1 | 2.1 | 4.4  | 4.58E-01 | 5.00E-05 | 1.00E+00 | 2.85E-04 |
| Prokr1_chr6     | 0  | 0  | 0  | 2     | 0.0  | 1.0 | 1.1 | 2.1  | 8.67E-01 | 5.00E-05 | 1.00E+00 | 2.85E-04 |
| Prom1_chr5      | 0  | 1  | 1  | 4     | 0.0  | 1.0 | 2.0 | 4.1  | 1.02E-01 | 5.00E-05 | 9.20E-01 | 2.49E-04 |
| Prr11_chr11     | 1  | 1  | 2  | 12    | 0.2  | 1.2 | 2.8 | 6.9  | 5.95E-01 | 5.00E-05 | 1.00E+00 | 2.85E-04 |
| Prss34_chr17    | 0  | 0  | 0  | 2     | 0.0  | 1.0 | 1.2 | 2.3  | 3.71E-01 | 5.00E-05 | 1.00E+00 | 2.85E-04 |
| Ptdss2_chr7     | 3  | 4  | 6  | 37    | 0.2  | 1.2 | 2.6 | 6.0  | 5.24E-01 | 5.00E-05 | 1.00E+00 | 2.85E-04 |
| Ptgr1_chr4      | 1  | 1  | 2  | 3     | -0.2 | 1.1 | 1.1 | 2.1  | 7.29E-01 | 5.00E-05 | 1.00E+00 | 2.85E-04 |
| Ptpla_chr2      | 1  | 1  | 1  | 3     | -0.2 | 1.1 | 1.4 | 2.7  | 7.57E-01 | 5.00E-05 | 1.00E+00 | 2.85E-04 |
| Pxmp2_chr5      | 1  | 1  | 1  | 2     | 0.0  | 1.0 | 1.2 | 2.3  | 9.99E-01 | 5.00E-05 | 1.00E+00 | 2.85E-04 |
| Pygl_chr12      | 7  | 9  | 12 | 37    | 0.4  | 1.3 | 1.7 | 3.2  | 9.91E-02 | 5.00E-05 | 9.35E-01 | 2.85E-04 |
| Rab15_chr12     | 1  | 0  | 1  | 2     | 0.0  | 1.0 | 1.3 | 2.4  | 6.64E-01 | 5.00E-05 | 1.00E+00 | 2.85E-04 |
| Rab27a_chr9     | 7  | 8  | 11 | 17    | 0.2  | 1.1 | 0.6 | 1.5  | 4.79E-01 | 1.00E-04 | 1.00E+00 | 5.44E-04 |
| Rab3il1_chr19   | 8  | 9  | 16 | 58    | 0.2  | 1.2 | 1.9 | 3.8  | 3.53E-01 | 5.00E-05 | 9.98E-01 | 2.85E-04 |
| Rab44_chr17     | 1  | 1  | 1  | 14    | 0.0  | 1.0 | 3.3 | 10.1 | 8.56E-01 | 5.00E-05 | 1.00E+00 | 2.85E-04 |
| Rad51_chr2      | 2  | 2  | 3  | 14    | 0.3  | 1.2 | 2.3 | 5.0  | 5.19E-01 | 5.00E-05 | 1.00E+00 | 2.85E-04 |
| Rad51ap1_chr6   | 1  | 2  | 2  | 14    | 0.3  | 1.2 | 2.9 | 7.6  | 5.84E-01 | 5.00E-05 | 1.00E+00 | 2.85E-04 |
| Ranbp10_chr8    | 12 | 13 | 23 | 98    | 0.1  | 1.1 | 2.1 | 4.2  | 5.11E-01 | 5.00E-05 | 1.00E+00 | 2.85E-04 |
| Rec8_chr14      | 0  | 0  | 0  | 5     | 0.0  | 1.0 | 2.4 | 5.1  | 4.01E-03 | 1.00E-04 | 3.11E-01 | 5.44E-04 |
| Recql4_chr15    | 1  | 1  | 2  | 9     | 0.1  | 1.1 | 2.2 | 4.5  | 7.69E-01 | 5.00E-05 | 1.00E+00 | 2.85E-04 |
| Redrum_chr18    | 0  | 0  | 0  | 7     | 0.0  | 1.0 | 2.7 | 6.7  | 1.65E-01 | 5.00E-05 | 1.00E+00 | 2.82E-04 |
| Retnlg_chr16    | 8  | 5  | 4  | 52    | -0.7 | 1.6 | 3.6 | 12.0 | 1.12E-01 | 5.00E-05 | 9.39E-01 | 2.85E-04 |
| Rfx2_chr17      | 1  | 1  | 3  | 12    | 0.4  | 1.3 | 2.2 | 4.5  | 3.83E-01 | 5.00E-05 | 1.00E+00 | 2.85E-04 |
| Rgcc_chr14      | 2  | 2  | 1  | 12    | 0.1  | 1.1 | 3.1 | 8.7  | 8.78E-01 | 5.00E-05 | 1.00E+00 | 2.85E-04 |
| Rgs1_chr1       | 14 | 11 | 13 | 20    | -0.3 | 1.3 | 0.7 | 1.6  | 2.14E-01 | 5.00E-05 | 9.88E-01 | 2.85E-04 |
| Rhag_chr17      | 1  | 2  | 2  | 82    | 0.6  | 1.5 | 5.7 | 51.7 | 2.11E-01 | 5.00E-05 | 9.53E-01 | 2.85E-04 |
| Rhd_chr4        | 1  | 3  | 2  | 79    | 1.3  | 2.5 | 5.6 | 48.2 | 1.11E-02 | 5.00E-05 | 3.86E-01 | 2.85E-04 |
| Rhou_chr8       | 0  | 0  | 0  | 2     | 0.0  | 1.0 | 1.2 | 2.4  | 3.50E-01 | 5.00E-05 | 1.00E+00 | 2.85E-04 |
| Rnaseh2b_chr14  | 6  | 8  | 7  | 22    | 0.3  | 1.2 | 1.6 | 3.1  | 3.10E-01 | 5.00E-05 | 9.97E-01 | 2.85E-04 |
| Rnase1_chr1     | 13 | 12 | 21 | 35    | -0.1 | 1.1 | 0.7 | 1.6  | 7.07E-01 | 5.00E-05 | 1.00E+00 | 2.85E-04 |
| Rnd1_chr15      | 1  | 1  | 1  | 2     | 0.0  | 1.0 | 0.6 | 1.6  | 9.51E-01 | 5.00E-05 | 1.00E+00 | 2.85E-04 |
| Rnf149_chr1     | 13 | 15 | 20 | 37    | 0.1  | 1.1 | 0.9 | 1.9  | 6.25E-01 | 5.00E-05 | 1.00E+00 | 2.85E-04 |
| Rrm1_chr7       | 14 | 15 | 23 | 86    | 0.2  | 1.1 | 1.9 | 3.8  | 4.05E-01 | 5.00E-05 | 1.00E+00 | 2.85E-04 |
| Rrm2_chr12      | 6  | 10 | 10 | 140   | 0.7  | 1.7 | 3.8 | 14.3 | 6.40E-03 | 5.00E-05 | 2.87E-01 | 2.85E-04 |
| Rsad2_chr12     | 14 | 16 | 26 | 116   | 0.3  | 1.2 | 2.1 | 4.4  | 2.45E-01 | 5.00E-05 | 9.69E-01 | 2.85E-04 |
| Rundc3a_chr11   | 1  | 1  | 1  | 2     | 0.0  | 1.0 | 0.9 | 1.9  | 7.11E-01 | 7.50E-05 | 1.00E+00 | 4.25E-04 |
| S100a8_chr3     | 48 | 70 | 24 | 1,172 | 0.6  | 1.5 | 5.6 | 49.4 | 2.72E-02 | 5.00E-05 | 5.97E-01 | 2.85E-04 |
| S100a9_chr3     | 41 | 63 | 26 | 1,322 | 0.6  | 1.5 | 5.7 | 50.9 | 1.20E-02 | 5.00E-05 | 4.04E-01 | 2.85E-04 |
| Samd14_chr11    | 2  | 3  | 5  | 34    | 0.2  | 1.2 | 2.7 | 6.3  | 5.21E-01 | 5.00E-05 | 1.00E+00 | 2.85E-04 |
| Sapcd2_chr2     | 0  | 0  | 0  | 2     | 0.0  | 1.0 | 1.2 | 2.3  | 7.17E-01 | 5.00E-05 | 1.00E+00 | 2.85E-04 |
| Scrn3_chr2      | 3  | 3  | 4  | 17    | -0.2 | 1.1 | 2.1 | 4.2  | 5.42E-01 | 5.00E-05 | 1.00E+00 | 2.85E-04 |
| Sdsl_chr5       | 0  | 0  | 0  | 2     | 0.0  | 1.0 | 1.0 | 2.0  | 9.12E-01 | 5.00E-05 | 1.00E+00 | 2.85E-04 |
| Sec14l2_chr11   | 0  | 0  | 0  | 9     | 0.0  | 1.0 | 3.1 | 8.6  | 1.47E-01 | 5.00E-05 | 9.68E-01 | 2.85E-04 |
| Sema4a_chr3     | 6  | 7  | 4  | 11    | 0.0  | 1.0 | 1.5 | 2.8  | 4.02E-01 | 5.00E-05 | 1.00E+00 | 2.99E-04 |
| Sept5_chr16     | 1  | 1  | 1  | 5     | 0.0  | 1.0 | 2.2 | 4.6  | 8.27E-01 | 5.00E-05 | 1.00E+00 | 2.85E-04 |
| Serpina3g_chr12 | 46 | 48 | 68 | 157   | 0.0  | 1.0 | 1.2 | 2.3  | 8.24E-01 | 5.00E-05 | 1.00E+00 | 2.85E-04 |
| Sertad3_chr7    | 4  | 6  | 6  | 13    | 0.4  | 1.3 | 1.1 | 2.1  | 2.80E-01 | 5.00E-05 | 9.94E-01 | 2.85E-04 |
| Sfxn5_chr6      | 2  | 2  | 4  | 6     | 0.2  | 1.1 | 0.8 | 1.8  | 5.87E-01 | 5.00E-05 | 1.00E+00 | 2.85E-04 |
| Sgms2_chr3      | 1  | 1  | 1  | 4     | 0.0  | 1.0 | 1.6 | 3.0  | 9.28E-01 | 5.00E-05 | 1.00E+00 | 2.85E-04 |
| Sgol1_chr17     | 1  | 1  | 1  | 15    | 0.0  | 1.0 | 3.6 | 11.8 | 8.25E-01 | 5.00E-05 | 1.00E+00 | 2.85E-04 |
| Sgol2_chr1      | 1  | 1  | 1  | 6     | 0.0  | 1.0 | 2.4 | 5.3  | 6.46E-01 | 5.00E-05 | 1.00E+00 | 2.90E-04 |
| Sh3tc2_chr18    | 1  | 1  | 3  | 20    | -0.2 | 1.2 | 2.9 | 7.2  | 5.78E-01 | 5.00E-05 | 1.00E+00 | 2.85E-04 |
| Sh3yl1_chr12    | 0  | 1  | 1  | 4     | 0.0  | 1.0 | 2.0 | 3.9  | 3.48E-01 | 5.00E-05 | 9.98E-01 | 2.85E-04 |
| Shcbp1_chr8     | 2  | 2  | 2  | 16    | -0.1 | 1.1 | 2.9 | 7.2  | 7.60E-01 | 5.00E-05 | 1.00E+00 | 2.85E-04 |
| Siah1b_chrX     | 1  | 2  | 2  | 5     | 0.2  | 1.1 | 1.2 | 2.3  | 7.49E-01 | 5.00E-05 | 1.00E+00 | 2.85E-04 |
| Siglece_chr7    | 8  | 12 | 14 | 42    | 0.6  | 1.5 | 1.5 | 2.9  | 3.43E-02 | 5.00E-05 | 6.53E-01 | 2.85E-04 |
| Sirpb1b_chr3    | 4  | 3  | 4  | 13    | -0.4 | 1.3 | 1.6 | 3.1  | 3.37E-01 | 5.00E-05 | 9.98E-01 | 2.85E-04 |
| Ska1_chr18      | 0  | 0  | 0  | 5     | 0.0  | 1.0 | 2.3 | 4.9  | 6.77E-01 | 5.00E-05 | 1.00E+00 | 2.85E-04 |
| Ska3_chr14      | 1  | 1  | 1  | 7     | 0.0  | 1.0 | 2.5 | 5.7  | 4.30E-01 | 5.00E-05 | 1.00E+00 | 2.85E-04 |
| Slc16a10_chr10  | 4  | 5  | 8  | 43    | 0.2  | 1.1 | 2.5 | 5.6  | 5.69E-01 | 5.00E-05 | 1.00E+00 | 2.85E-04 |
| Slc16a3_chr11   | 2  | 2  | 2  | 6     | 0.4  | 1.3 | 1.2 | 2.2  | 4.88E-01 | 3.53E-03 | 1.00E+00 | 1.15E-02 |
| Slc22a23_chr13  | 2  | 2  | 4  | 13    | 0.1  | 1.1 | 1.9 | 3.7  | 7.36E-01 | 5.00E-05 | 1.00E+00 | 2.85E-04 |
| Slc22a4_chr11   | 1  | 0  | 1  | 11    | 0.0  | 1.0 | 3.4 | 10.6 | 2.69E-01 | 5.00E-05 | 9.94E-01 | 2.85E-04 |
| Slc25a21_chr12  | 1  | 0  | 1  | 9     | 0.0  | 1.0 | 3.2 | 9.2  | 7.97E-01 | 5.00E-05 | 1.00E+00 | 2.85E-04 |
| Slc25a37_chr14  | 37 | 48 | 55 | 319   | 0.4  | 1.3 | 2.5 | 5.8  | 9.45E-02 | 5.00E-05 | 9.27E-01 | 2.85E-04 |
| Slc25a38_chr9   | 8  | 9  | 12 | 41    | 0.2  | 1.2 | 1.7 | 3.3  | 3.93E-01 | 5.00E-05 | 1.00E+00 | 2.85E-04 |
| Slc25a39_chr11  | 15 | 27 | 30 | 63    | 0.8  | 1.7 | 1.1 | 2.1  | 5.22E-04 | 5.00E-05 | 8.17E-02 | 2.85E-04 |
| Slc2a4_chr11    | 0  | 0  | 0  | 5     | 0.0  | 1.0 | 2.4 | 5.3  | 8.95E-01 | 5.00E-05 | 1.00E+00 | 2.85E-04 |
| Slc38a5_chrX    | 0  | 1  | 1  | 20    | 0.0  | 1.0 | 4.1 | 17.2 | 1.24E-01 | 5.00E-05 | 8.74E-01 | 2.85E-04 |
| Slc43a3_chr2    | 6  | 10 | 11 | 74    | 0.7  | 1.6 | 2.7 | 6.5  | 9.16E-03 | 5.00E-05 | 4.45E-01 | 2.85E-04 |
| Slc4a1_chr11    | 8  | 14 | 27 | 806   | 0.8  | 1.8 | 4.9 | 29.3 | 1.35E-03 | 5.00E-05 | 1.09E-01 | 2.85E-04 |
| Slc6a20a_chr9   | 1  | 1  | 2  | 6     | 0.0  | 1.0 | 1.7 | 3.2  | 9.54E-01 | 5.00E-05 | 1.00E+00 | 2.85E-04 |
| Slc6a9_chr4     | 1  | 1  | 2  | 32    | 0.2  | 1.1 | 4.4 | 20.6 | 1.40E-01 | 5.00E-05 | 9.64E-01 | 2.85E-04 |
| Slc7a5_chr8     | 6  | 8  | 15 | 61    | 0.5  | 1.4 | 2.0 | 4.0  | 6.68E-02 | 5.00E-05 | 8.76E-01 | 2.85E-04 |
| Slco4c1_chr1    | 0  | 0  | 0  | 2     | 0.0  | 1.0 | 0.9 | 1.9  | 8.78E-01 | 5.00E-05 | 1.00E+00 | 2.85E-04 |
| Slnf14_chr11    | 0  | 1  | 1  | 33    | 0.0  | 1.0 | 5.0 | 32.5 | 9.51E-02 | 5.00E-05 | 9.28E-01 | 2.85E-04 |
| Slnf4_chr11     | 1  | 2  | 2  | 47    | 0.5  | 1.4 | 5.0 | 31.5 | 1.93E-01 | 5.00E-05 | 9.87E-01 | 2.85E-04 |
| Slpi_chr2       | 23 | 47 | 19 | 107   | 1.0  | 2.1 | 2.5 | 5.8  | 1.41E-05 | 5.00E-05 | 3.69E-03 | 2.85E-04 |
| Smc2_chr4       | 8  | 8  | 14 | 68    | 0.0  | 1.0 | 2.3 | 5.0  | 8.54E-01 | 5.00E-05 | 1.00E+00 | 2.85E-04 |
| Smim3_chr18     | 3  | 5  | 5  | 8     | 0.5  | 1.4 | 0.6 | 1.5  | 1.42E-01 | 1.00E-04 | 9.65E-01 | 5.44E-04 |
| Snhg4_chr18     | 4  | 4  | 3  | 5     | -0.1 | 1.1 | 0.7 | 1.6  | 7.38E-01 | 4.00E-04 | 1.00E+00 | 1.89E-03 |
| Soat2_chr15     | 1  | 1  | 1  | 4     | 0.0  | 1.0 | 2.1 | 4.2  | 9.40E-01 | 5.00E-05 | 1.00E+00 | 2.85E-04 |



|                |    |    |    |     |      |     |     |      |          |          |          |          |
|----------------|----|----|----|-----|------|-----|-----|------|----------|----------|----------|----------|
| Socs3_chr11    | 6  | 6  | 11 | 23  | 0.1  | 1.1 | 1.1 | 2.2  | 6.24E-01 | 5.00E-05 | 1.00E+00 | 2.85E-04 |
| Sort1_chr3     | 6  | 7  | 14 | 22  | 0.1  | 1.1 | 0.7 | 1.6  | 5.31E-01 | 5.00E-05 | 1.00E+00 | 2.85E-04 |
| Sowaha_chr11   | 0  | 0  | 0  | 17  | 0.0  | 1.0 | 4.1 | 16.9 | 2.76E-01 | 5.00E-05 | 1.00E+00 | 2.85E-04 |
| Sox6_chr7      | 0  | 0  | 0  | 12  | 0.0  | 1.0 | 3.6 | 11.9 | 8.17E-01 | 1.91E-02 | 1.00E+00 | 4.83E-02 |
| Spag5_chr11    | 2  | 2  | 3  | 27  | 0.4  | 1.3 | 3.2 | 9.3  | 2.32E-01 | 5.00E-05 | 9.91E-01 | 2.85E-04 |
| Spc24_chr9     | 2  | 2  | 3  | 11  | 0.0  | 1.0 | 2.0 | 4.0  | 9.54E-01 | 5.00E-05 | 1.00E+00 | 2.85E-04 |
| Spc25_chr2     | 3  | 3  | 2  | 23  | 0.1  | 1.1 | 3.1 | 8.5  | 8.06E-01 | 5.00E-05 | 1.00E+00 | 2.93E-04 |
| Spdl1_chr11    | 2  | 2  | 3  | 10  | 0.2  | 1.1 | 1.8 | 3.5  | 6.08E-01 | 5.00E-05 | 1.00E+00 | 2.85E-04 |
| Specc1_chr11   | 3  | 5  | 11 | 49  | 0.6  | 1.6 | 2.2 | 4.5  | 7.81E-03 | 5.00E-05 | 4.27E-01 | 2.85E-04 |
| Spire1_chr18   | 2  | 2  | 4  | 19  | 0.1  | 1.1 | 2.2 | 4.6  | 8.10E-01 | 5.00E-05 | 1.00E+00 | 2.90E-04 |
| Spon1_chr7     | 1  | 1  | 2  | 5   | 0.3  | 1.3 | 1.1 | 2.1  | 2.12E-01 | 5.00E-05 | 9.88E-01 | 2.85E-04 |
| Spta1_chr1     | 2  | 2  | 7  | 76  | 0.0  | 1.0 | 3.5 | 11.3 | 9.08E-01 | 5.00E-05 | 1.00E+00 | 2.85E-04 |
| Sptb_chr12     | 1  | 2  | 5  | 97  | 0.4  | 1.3 | 4.3 | 20.0 | 1.41E-01 | 5.00E-05 | 8.93E-01 | 2.85E-04 |
| Ssx2ip_chr3    | 1  | 2  | 2  | 9   | 0.2  | 1.1 | 2.3 | 5.0  | 8.04E-01 | 5.00E-05 | 1.00E+00 | 2.92E-04 |
| St7_chr6       | 2  | 2  | 3  | 8   | -0.2 | 1.2 | 1.3 | 2.4  | 6.21E-01 | 5.00E-05 | 1.00E+00 | 2.85E-04 |
| Stard10_chr7   | 8  | 11 | 13 | 29  | 0.4  | 1.3 | 1.2 | 2.3  | 2.43E-01 | 5.00E-05 | 9.92E-01 | 2.85E-04 |
| Steap3_chr1    | 2  | 3  | 5  | 23  | 0.4  | 1.3 | 2.3 | 5.1  | 2.61E-01 | 5.00E-05 | 9.94E-01 | 2.85E-04 |
| Steap4_chr5    | 1  | 1  | 2  | 4   | 0.0  | 1.0 | 1.2 | 2.3  | 9.82E-01 | 5.00E-05 | 1.00E+00 | 2.85E-04 |
| Stfa2l1_chr16  | 1  | 1  | 0  | 5   | 0.0  | 1.0 | 2.4 | 5.1  | 9.72E-01 | 3.50E-04 | 1.00E+00 | 1.69E-03 |
| Stil_chr4      | 1  | 1  | 1  | 10  | 0.0  | 1.0 | 3.2 | 9.1  | 7.80E-01 | 5.00E-05 | 1.00E+00 | 2.85E-04 |
| Stmn1_chr4     | 17 | 24 | 23 | 97  | 0.5  | 1.4 | 2.1 | 4.3  | 5.92E-02 | 5.00E-05 | 7.61E-01 | 2.85E-04 |
| Stom_chr2      | 16 | 19 | 25 | 86  | 0.2  | 1.2 | 1.8 | 3.4  | 2.77E-01 | 5.00E-05 | 9.94E-01 | 2.85E-04 |
| Stx2_chr5      | 7  | 7  | 13 | 39  | 0.0  | 1.0 | 1.6 | 2.9  | 9.78E-01 | 5.00E-05 | 1.00E+00 | 2.85E-04 |
| Svip_chr7      | 2  | 2  | 3  | 11  | -0.2 | 1.1 | 2.1 | 4.4  | 6.10E-01 | 5.00E-05 | 1.00E+00 | 2.85E-04 |
| Syng1_chr15    | 0  | 0  | 0  | 2   | 0.0  | 1.0 | 1.2 | 2.3  | 8.02E-01 | 3.88E-03 | 1.00E+00 | 1.35E-02 |
| Tacc3_chr5     | 5  | 6  | 8  | 34  | 0.2  | 1.2 | 2.1 | 4.3  | 3.93E-01 | 5.00E-05 | 1.00E+00 | 2.85E-04 |
| Tal1_chr4      | 2  | 3  | 5  | 66  | 0.2  | 1.1 | 3.9 | 14.5 | 5.46E-01 | 5.00E-05 | 1.00E+00 | 2.85E-04 |
| Tarm1_chr7     | 0  | 0  | 0  | 2   | 0.0  | 1.0 | 0.8 | 1.8  | 7.27E-01 | 5.00E-05 | 1.00E+00 | 2.85E-04 |
| Tarsl2_chr7    | 2  | 2  | 4  | 10  | -0.1 | 1.0 | 1.3 | 2.5  | 8.49E-01 | 5.00E-05 | 1.00E+00 | 2.85E-04 |
| Tbc1d2_chr4    | 0  | 0  | 1  | 2   | 0.0  | 1.0 | 0.7 | 1.6  | 8.80E-01 | 5.00E-05 | 1.00E+00 | 2.85E-04 |
| Tbc1d24_chr17  | 1  | 1  | 2  | 4   | -0.3 | 1.2 | 0.9 | 1.9  | 3.18E-01 | 1.83E-03 | 9.96E-01 | 6.77E-03 |
| Tceal8_chrX    | 3  | 3  | 3  | 5   | -0.1 | 1.1 | 1.0 | 2.0  | 7.70E-01 | 5.00E-05 | 1.00E+00 | 2.85E-04 |
| Tfdp1_chr8     | 17 | 18 | 29 | 75  | 0.1  | 1.1 | 1.4 | 2.6  | 6.85E-01 | 5.00E-05 | 1.00E+00 | 2.85E-04 |
| Tfec_chr6      | 4  | 3  | 4  | 9   | -0.4 | 1.3 | 1.1 | 2.2  | 2.87E-01 | 5.00E-05 | 9.95E-01 | 2.85E-04 |
| Tfr2_chr5      | 1  | 1  | 1  | 11  | 0.0  | 1.0 | 2.9 | 7.5  | 6.35E-01 | 5.00E-05 | 1.00E+00 | 2.85E-04 |
| Tfrc_chr16     | 13 | 14 | 18 | 325 | 0.1  | 1.1 | 4.2 | 18.5 | 6.65E-01 | 5.00E-05 | 1.00E+00 | 2.85E-04 |
| Thbs1_chr2     | 6  | 10 | 14 | 32  | 0.8  | 1.7 | 1.2 | 2.2  | 6.74E-04 | 5.00E-05 | 6.64E-02 | 2.85E-04 |
| Ticrr_chr7     | 1  | 1  | 1  | 7   | 0.0  | 1.0 | 2.5 | 5.5  | 6.95E-01 | 5.00E-05 | 1.00E+00 | 2.85E-04 |
| Tigd3_chr19    | 0  | 1  | 1  | 2   | 0.0  | 1.0 | 1.2 | 2.4  | 5.19E-01 | 5.00E-05 | 1.00E+00 | 2.85E-04 |
| Tigit_chr16    | 2  | 3  | 2  | 5   | 0.6  | 1.6 | 0.9 | 1.9  | 1.94E-01 | 5.00E-05 | 9.87E-01 | 2.85E-04 |
| Tipin_chr9     | 9  | 10 | 9  | 29  | 0.2  | 1.1 | 1.7 | 3.2  | 5.59E-01 | 5.00E-05 | 1.00E+00 | 2.85E-04 |
| Tk1_chr11      | 10 | 10 | 12 | 38  | 0.0  | 1.0 | 1.7 | 3.2  | 9.14E-01 | 5.00E-05 | 1.00E+00 | 2.85E-04 |
| Tlcd1_chr11    | 1  | 1  | 1  | 8   | 0.0  | 1.0 | 2.7 | 6.7  | 8.73E-01 | 5.00E-05 | 1.00E+00 | 2.85E-04 |
| Tlr13_chrX     | 6  | 5  | 10 | 21  | -0.3 | 1.2 | 1.1 | 2.1  | 2.23E-01 | 5.00E-05 | 9.91E-01 | 2.85E-04 |
| Tlr8_chrX      | 4  | 3  | 7  | 13  | -0.5 | 1.4 | 1.0 | 2.0  | 1.06E-01 | 5.00E-05 | 8.51E-01 | 2.85E-04 |
| Tmcc2_chr1     | 3  | 5  | 8  | 181 | 0.6  | 1.5 | 4.5 | 23.2 | 3.45E-02 | 5.00E-05 | 6.53E-01 | 2.85E-04 |
| Tmem120b_chr5  | 1  | 1  | 2  | 9   | 0.0  | 1.0 | 2.2 | 4.4  | 9.87E-01 | 5.00E-05 | 1.00E+00 | 2.85E-04 |
| Tmem14c_chr13  | 30 | 34 | 28 | 81  | 0.2  | 1.1 | 1.6 | 2.9  | 4.29E-01 | 5.00E-05 | 1.00E+00 | 2.85E-04 |
| Tmem216_chr19  | 2  | 3  | 2  | 3   | 0.4  | 1.3 | 0.6 | 1.5  | 4.32E-01 | 9.75E-03 | 1.00E+00 | 3.06E-02 |
| Tmem255a_chrX  | 1  | 1  | 2  | 3   | 0.6  | 1.5 | 1.0 | 2.0  | 1.08E-01 | 5.00E-05 | 9.38E-01 | 2.85E-04 |
| Tmem40_chr6    | 1  | 2  | 1  | 4   | 0.6  | 1.6 | 1.6 | 3.1  | 2.75E-01 | 5.00E-05 | 9.87E-01 | 2.85E-04 |
| Tmem56_chr3    | 0  | 0  | 0  | 11  | 0.0  | 1.0 | 3.5 | 11.1 | 7.68E-01 | 5.00E-05 | 1.00E+00 | 2.85E-04 |
| Tnfaip2_chr12  | 8  | 9  | 16 | 57  | 0.1  | 1.1 | 1.9 | 3.7  | 5.43E-01 | 5.00E-05 | 1.00E+00 | 2.85E-04 |
| Tnfrsf14_chr4  | 17 | 18 | 39 | 91  | 0.1  | 1.1 | 1.2 | 2.3  | 7.54E-01 | 5.00E-05 | 1.00E+00 | 2.85E-04 |
| Tnfrsf17_chr16 | 1  | 1  | 1  | 2   | 0.0  | 1.0 | 1.3 | 2.4  | 5.36E-01 | 5.00E-05 | 1.00E+00 | 2.85E-04 |
| Tnfsf14_chr17  | 2  | 3  | 3  | 8   | 0.5  | 1.5 | 1.3 | 2.4  | 1.61E-01 | 5.00E-05 | 9.78E-01 | 2.85E-04 |
| Tom1l1_chr11   | 1  | 1  | 2  | 13  | 0.1  | 1.1 | 3.1 | 8.3  | 8.39E-01 | 5.00E-05 | 1.00E+00 | 2.85E-04 |
| Top2a_chr11    | 9  | 11 | 17 | 127 | 0.3  | 1.3 | 2.9 | 7.5  | 1.23E-01 | 5.00E-05 | 8.73E-01 | 2.85E-04 |
| Traip_chr9     | 1  | 1  | 1  | 6   | 0.5  | 1.4 | 2.1 | 4.2  | 2.04E-01 | 5.00E-05 | 9.87E-01 | 2.85E-04 |
| Trak2_chr1     | 20 | 20 | 39 | 121 | 0.0  | 1.0 | 1.6 | 3.1  | 9.05E-01 | 5.00E-05 | 1.00E+00 | 2.85E-04 |
| Trem1_chr17    | 2  | 1  | 3  | 5   | -0.4 | 1.3 | 0.8 | 1.8  | 3.52E-01 | 5.00E-05 | 9.98E-01 | 2.85E-04 |
| Trem3_chr17    | 1  | 1  | 1  | 11  | 0.0  | 1.0 | 3.4 | 10.6 | 8.86E-01 | 5.00E-05 | 1.00E+00 | 2.85E-04 |
| Trem1l1_chr17  | 2  | 4  | 2  | 7   | 1.2  | 2.3 | 1.6 | 3.1  | 6.21E-03 | 5.00E-05 | 3.73E-01 | 2.85E-04 |
| Trim10_chr17   | 4  | 7  | 8  | 137 | 0.8  | 1.7 | 4.1 | 16.6 | 9.53E-03 | 5.00E-05 | 3.54E-01 | 2.85E-04 |
| Trim58_chr11   | 0  | 0  | 1  | 19  | 0.0  | 1.0 | 4.3 | 19.4 | 5.70E-01 | 5.00E-05 | 1.00E+00 | 2.85E-04 |
| Trip13_chr13   | 1  | 2  | 2  | 6   | 0.1  | 1.1 | 1.6 | 3.0  | 7.35E-01 | 5.00E-05 | 1.00E+00 | 2.85E-04 |
| Troap_chr15    | 0  | 0  | 1  | 5   | 0.0  | 1.0 | 2.4 | 5.2  | 7.88E-01 | 5.00E-05 | 1.00E+00 | 2.85E-04 |
| Tspan33_chr6   | 5  | 5  | 10 | 89  | 0.1  | 1.1 | 3.2 | 9.1  | 7.20E-01 | 5.00E-05 | 1.00E+00 | 2.85E-04 |
| Tspo_chr15     | 22 | 27 | 20 | 42  | 0.3  | 1.2 | 1.1 | 2.2  | 2.21E-01 | 5.00E-05 | 9.90E-01 | 2.85E-04 |
| Tspo2_chr17    | 0  | 1  | 0  | 28  | 0.3  | 1.3 | 4.8 | 27.9 | 2.05E-03 | 5.00E-05 | 1.98E-01 | 2.85E-04 |
| Tst_chr15      | 2  | 3  | 3  | 5   | 0.6  | 1.6 | 0.9 | 1.9  | 2.02E-01 | 1.00E-04 | 9.87E-01 | 5.44E-04 |
| Ttk_chr9       | 1  | 1  | 1  | 11  | 0.0  | 1.0 | 3.2 | 9.5  | 9.45E-01 | 5.00E-05 | 1.00E+00 | 2.85E-04 |
| Tuba4a_chr1    | 23 | 34 | 37 | 96  | 0.6  | 1.5 | 1.4 | 2.6  | 1.99E-02 | 5.00E-05 | 6.31E-01 | 2.85E-04 |
| Tuba8_chr6     | 1  | 1  | 1  | 3   | 0.1  | 1.1 | 1.8 | 3.4  | 1.04E-01 | 5.00E-05 | 9.38E-01 | 2.85E-04 |
| Tubb1_chr2     | 8  | 11 | 18 | 38  | 0.6  | 1.5 | 1.1 | 2.1  | 4.77E-02 | 5.00E-05 | 7.23E-01 | 2.85E-04 |
| Tubb4b_chr2    | 41 | 58 | 58 | 161 | 0.5  | 1.4 | 1.5 | 2.8  | 1.59E-02 | 5.00E-05 | 5.75E-01 | 2.85E-04 |
| Tusc1_chr4     | 1  | 1  | 1  | 2   | 0.0  | 1.0 | 1.3 | 2.5  | 9.96E-01 | 5.00E-05 | 1.00E+00 | 2.85E-04 |
| Txn1_chr4      | 57 | 55 | 34 | 80  | 0.0  | 1.0 | 1.3 | 2.4  | 8.76E-01 | 5.00E-05 | 1.00E+00 | 2.85E-04 |
| Tyms_chr5      | 3  | 3  | 3  | 13  | -0.1 | 1.1 | 1.9 | 3.8  | 7.41E-01 | 5.00E-05 | 1.00E+00 | 2.85E-04 |
| Ubc1_chr2      | 5  | 6  | 8  | 47  | 0.4  | 1.3 | 2.6 | 6.1  | 1.49E-01 | 5.00E-05 | 9.69E-01 | 2.85E-04 |
| Ube2c_chr2     | 6  | 9  | 8  | 65  | 0.6  | 1.5 | 3.0 | 8.1  | 1.03E-01 | 5.00E-05 | 9.38E-01 | 2.85E-04 |

|                     |     |     |     |     |      |     |     |      |          |          |          |          |
|---------------------|-----|-----|-----|-----|------|-----|-----|------|----------|----------|----------|----------|
| Ube2l6_chr2         | 27  | 51  | 42  | 175 | 0.9  | 1.9 | 2.1 | 4.2  | 1.44E-05 | 5.00E-05 | 3.70E-03 | 2.85E-04 |
| Ube2o_chr11         | 10  | 17  | 32  | 124 | 0.7  | 1.7 | 1.9 | 3.8  | 5.12E-04 | 5.00E-05 | 5.54E-02 | 2.85E-04 |
| Ube2s_chr7          | 14  | 17  | 18  | 49  | 0.2  | 1.2 | 1.5 | 2.8  | 4.31E-01 | 5.00E-05 | 1.00E+00 | 2.85E-04 |
| Ube2t_chr1          | 2   | 2   | 2   | 9   | 0.1  | 1.1 | 2.4 | 5.3  | 8.53E-01 | 5.00E-05 | 1.00E+00 | 2.85E-04 |
| Ufsp1_chr5          | 1   | 1   | 1   | 4   | 0.3  | 1.3 | 2.0 | 3.9  | 5.84E-01 | 5.00E-05 | 1.00E+00 | 2.85E-04 |
| Ugt1a7c_chr1        | 2   | 2   | 3   | 6   | -0.1 | 1.0 | 1.1 | 2.2  | 8.70E-01 | 5.00E-05 | 1.00E+00 | 2.85E-04 |
| Uhrf1bp1_chr17      | 2   | 2   | 4   | 8   | 0.1  | 1.0 | 1.0 | 1.9  | 8.55E-01 | 5.00E-05 | 1.00E+00 | 2.85E-04 |
| Upp1_chr11          | 1   | 1   | 1   | 2   | 0.0  | 1.0 | 1.2 | 2.3  | 6.28E-01 | 5.00E-05 | 1.00E+00 | 2.85E-04 |
| Urod_chr4           | 10  | 13  | 12  | 78  | 0.5  | 1.4 | 2.7 | 6.5  | 9.21E-02 | 5.00E-05 | 9.27E-01 | 2.85E-04 |
| Uros_chr7           | 6   | 6   | 6   | 39  | 0.2  | 1.1 | 2.6 | 6.0  | 5.78E-01 | 5.00E-05 | 1.00E+00 | 2.85E-04 |
| Usp46_chr5          | 4   | 4   | 8   | 21  | 0.0  | 1.0 | 1.5 | 2.8  | 8.91E-01 | 5.00E-05 | 1.00E+00 | 2.85E-04 |
| Vcam1_chr3          | 169 | 149 | 245 | 391 | -0.2 | 1.1 | 0.7 | 1.6  | 4.94E-01 | 2.10E-03 | 1.00E+00 | 8.18E-03 |
| Vcan_chr13          | 0   | 0   | 1   | 3   | 0.0  | 1.0 | 1.7 | 3.3  | 6.13E-01 | 5.00E-05 | 1.00E+00 | 2.61E-04 |
| Vmp1_chr11          | 14  | 13  | 15  | 33  | -0.1 | 1.0 | 1.1 | 2.2  | 8.20E-01 | 5.00E-05 | 1.00E+00 | 2.85E-04 |
| Vopp1_chr6          | 11  | 14  | 17  | 44  | 0.3  | 1.2 | 1.4 | 2.6  | 2.04E-01 | 5.00E-05 | 9.87E-01 | 2.85E-04 |
| Wbscr27_chr5        | 1   | 1   | 2   | 4   | -0.2 | 1.2 | 1.4 | 2.6  | 3.99E-01 | 5.00E-05 | 1.00E+00 | 2.85E-04 |
| Wdhd1_chr14         | 4   | 5   | 6   | 27  | 0.3  | 1.2 | 2.1 | 4.2  | 2.42E-01 | 5.00E-05 | 9.92E-01 | 2.85E-04 |
| Wdr34_chr2          | 1   | 1   | 2   | 4   | 0.0  | 1.0 | 1.0 | 2.0  | 9.58E-01 | 5.00E-05 | 1.00E+00 | 2.85E-04 |
| Wdr62_chr7          | 1   | 1   | 3   | 7   | 0.0  | 1.0 | 1.4 | 2.7  | 9.91E-01 | 5.00E-05 | 1.00E+00 | 2.85E-04 |
| Wfdc17_chr11        | 7   | 7   | 4   | 41  | 0.0  | 1.0 | 3.3 | 9.5  | 9.57E-01 | 5.00E-05 | 1.00E+00 | 2.85E-04 |
| Wfdc21_chr11        | 2   | 2   | 1   | 26  | 0.3  | 1.3 | 4.7 | 26.1 | 6.13E-01 | 5.00E-05 | 1.00E+00 | 2.85E-04 |
| Wipi1_chr11         | 3   | 3   | 5   | 15  | 0.1  | 1.1 | 1.5 | 2.8  | 8.00E-01 | 5.00E-05 | 1.00E+00 | 2.85E-04 |
| Xbp1_chr11          | 48  | 60  | 75  | 169 | 0.3  | 1.2 | 1.2 | 2.2  | 1.26E-01 | 5.00E-05 | 9.51E-01 | 2.85E-04 |
| Xdh_chr17           | 9   | 8   | 20  | 39  | -0.2 | 1.1 | 1.0 | 2.0  | 4.56E-01 | 5.00E-05 | 1.00E+00 | 2.85E-04 |
| Xk_chrX             | 2   | 3   | 4   | 14  | 0.3  | 1.3 | 1.8 | 3.4  | 2.71E-01 | 5.00E-05 | 9.94E-01 | 2.85E-04 |
| Xkr5_chr8           | 0   | 0   | 0   | 2   | 0.0  | 1.0 | 0.8 | 1.7  | 5.75E-01 | 5.00E-05 | 1.00E+00 | 2.61E-04 |
| Xpo7_chr14          | 5   | 6   | 9   | 53  | 0.2  | 1.2 | 2.5 | 5.6  | 3.19E-01 | 5.00E-05 | 9.97E-01 | 2.85E-04 |
| Ybx3_chr6           | 11  | 15  | 24  | 68  | 0.4  | 1.4 | 1.5 | 2.8  | 2.45E-01 | 5.00E-05 | 8.88E-01 | 3.08E-04 |
| Ypel4_chr2          | 0   | 0   | 0   | 33  | 0.0  | 1.0 | 5.1 | 33.3 | 3.03E-01 | 5.00E-05 | 1.00E+00 | 2.85E-04 |
| Zbtbd6_chr14        | 0   | 0   | 0   | 2   | 0.0  | 1.0 | 1.1 | 2.2  | 6.51E-01 | 5.00E-05 | 1.00E+00 | 2.85E-04 |
| Zfand4_chr6         | 1   | 1   | 1   | 4   | 0.0  | 1.0 | 1.3 | 2.4  | 5.56E-01 | 5.00E-05 | 1.00E+00 | 2.85E-04 |
| Zfpm1_chr8          | 5   | 6   | 14  | 67  | 0.3  | 1.2 | 2.2 | 4.7  | 2.55E-01 | 5.00E-05 | 9.92E-01 | 2.85E-04 |
| Zwilch_chr9         | 2   | 2   | 3   | 12  | -0.1 | 1.0 | 2.1 | 4.2  | 8.75E-01 | 5.00E-05 | 1.00E+00 | 2.85E-04 |
| 0610009B22Rik_chr11 | 5   | 5   | 4   | 7   | 0.1  | 1.1 | 0.9 | 1.8  | 8.47E-01 | 5.00E-05 | 1.00E+00 | 2.85E-04 |
| 1110004E09Rik_chr16 | 3   | 5   | 4   | 6   | 0.4  | 1.4 | 0.6 | 1.5  | 2.59E-01 | 1.25E-03 | 9.93E-01 | 5.20E-03 |
| 1110008F13Rik_chr2  | 6   | 7   | 6   | 9   | 0.3  | 1.3 | 0.6 | 1.6  | 4.44E-01 | 3.04E-02 | 1.00E+00 | 7.90E-02 |
| 1110059G10Rik_chr9  | 3   | 3   | 2   | 4   | 0.1  | 1.1 | 0.7 | 1.6  | 7.44E-01 | 3.00E-04 | 1.00E+00 | 1.47E-03 |
| 1500011K16Rik_chr2  | 8   | 8   | 5   | 8   | 0.0  | 1.0 | 0.6 | 1.5  | 9.83E-01 | 1.15E-03 | 1.00E+00 | 4.79E-03 |
| 1600002H07Rik_chr17 | 2   | 3   | 3   | 6   | 0.1  | 1.1 | 0.9 | 1.9  | 7.19E-01 | 5.00E-05 | 1.00E+00 | 2.85E-04 |
| 1600010M07Rik_chr7  | 5   | 6   | 3   | 7   | 0.1  | 1.0 | 1.1 | 2.1  | 8.89E-01 | 5.00E-05 | 1.00E+00 | 2.82E-04 |
| 1700052K11Rik_chr11 | 1   | 2   | 2   | 2   | 0.4  | 1.3 | 0.7 | 1.6  | 3.41E-01 | 4.00E-04 | 9.97E-01 | 1.89E-03 |
| 1810022K09Rik_chr3  | 39  | 33  | 16  | 32  | -0.2 | 1.2 | 1.0 | 1.9  | 4.65E-01 | 5.00E-05 | 1.00E+00 | 2.85E-04 |
| 1810032O08Rik_chr11 | 4   | 7   | 4   | 9   | 0.7  | 1.6 | 1.1 | 2.1  | 1.74E-01 | 2.00E-03 | 9.20E-01 | 7.31E-03 |
| 1810037I17Rik_chr3  | 17  | 24  | 13  | 36  | 0.5  | 1.4 | 1.5 | 2.8  | 3.90E-02 | 5.00E-05 | 7.91E-01 | 2.85E-04 |
| 1810058I24Rik_chr6  | 18  | 25  | 17  | 27  | 0.5  | 1.4 | 0.7 | 1.6  | 5.47E-02 | 5.00E-05 | 8.47E-01 | 2.82E-04 |
| 2010107E04Rik_chr12 | 61  | 62  | 34  | 57  | 0.0  | 1.0 | 0.8 | 1.7  | 9.96E-01 | 5.00E-05 | 1.00E+00 | 2.85E-04 |
| 2210408F21Rik_chr6  | 1   | 1   | 1   | 2   | 0.0  | 1.0 | 0.8 | 1.7  | 9.44E-01 | 6.35E-03 | 1.00E+00 | 1.97E-02 |
| 2410127L17Rik_chr19 | 8   | 8   | 10  | 21  | 0.1  | 1.1 | 1.1 | 2.1  | 7.19E-01 | 5.00E-05 | 1.00E+00 | 2.85E-04 |
| 2500004C02Rik_chr2  | 2   | 1   | 1   | 2   | -0.3 | 1.2 | 0.7 | 1.7  | 5.41E-01 | 5.00E-04 | 1.00E+00 | 2.30E-03 |
| 2610301B20Rik_chr4  | 4   | 4   | 5   | 8   | 0.0  | 1.0 | 0.6 | 1.6  | 8.85E-01 | 1.00E-04 | 1.00E+00 | 5.44E-04 |
| 2610318N02Rik_chr16 | 1   | 1   | 1   | 2   | 0.0  | 1.0 | 0.9 | 1.9  | 8.69E-01 | 5.00E-05 | 1.00E+00 | 2.85E-04 |
| 2700029M09Rik_chr8  | 12  | 15  | 14  | 25  | 0.3  | 1.2 | 0.9 | 1.9  | 2.42E-01 | 5.00E-05 | 9.92E-01 | 2.85E-04 |
| 2700097O09Rik_chr12 | 2   | 2   | 1   | 3   | -0.1 | 1.1 | 1.1 | 2.1  | 8.69E-01 | 3.15E-02 | 1.00E+00 | 6.43E-02 |
| 2700099C18Rik_chr17 | 1   | 2   | 2   | 4   | 0.2  | 1.2 | 1.4 | 2.7  | 7.04E-01 | 5.00E-05 | 1.00E+00 | 2.82E-04 |
| 2810408I11Rik_chr1  | 1   | 1   | 0   | 3   | 0.0  | 1.0 | 1.3 | 2.5  | 9.95E-01 | 5.00E-05 | 1.00E+00 | 2.82E-04 |
| 2900076A07Rik_chr7  | 2   | 1   | 1   | 2   | -0.2 | 1.2 | 0.6 | 1.5  | 7.05E-01 | 7.30E-03 | 1.00E+00 | 2.37E-02 |
| 3110002H16Rik_chr18 | 13  | 15  | 19  | 30  | 0.2  | 1.2 | 0.6 | 1.6  | 5.50E-01 | 1.67E-02 | 1.00E+00 | 4.80E-02 |
| 4930427A07Rik_chr12 | 3   | 5   | 6   | 13  | 0.7  | 1.6 | 1.1 | 2.2  | 1.78E-02 | 5.00E-05 | 6.00E-01 | 2.85E-04 |
| 4930430F08Rik_chr10 | 3   | 3   | 4   | 22  | 0.0  | 1.0 | 2.4 | 5.4  | 9.44E-01 | 5.00E-05 | 1.00E+00 | 2.85E-04 |
| 5830415F09Rik_chr4  | 4   | 5   | 6   | 13  | 0.2  | 1.2 | 1.0 | 2.0  | 5.12E-01 | 5.00E-05 | 1.00E+00 | 2.85E-04 |
| 6430706D22Rik_chr1  | 4   | 12  | 7   | 49  | 1.5  | 2.7 | 2.8 | 7.0  | 2.75E-05 | 5.00E-05 | 6.38E-03 | 2.82E-04 |
| 6720489N17Rik_chr13 | 2   | 2   | 2   | 6   | -0.3 | 1.3 | 1.2 | 2.3  | 3.87E-01 | 5.00E-05 | 1.00E+00 | 2.85E-04 |
| 8430419L09Rik_chr6  | 6   | 10  | 13  | 27  | 0.7  | 1.6 | 1.0 | 2.0  | 3.91E-03 | 5.00E-05 | 3.11E-01 | 2.85E-04 |
| 9030025P20Rik_chr17 | 1   | 1   | 1   | 2   | 0.0  | 1.0 | 0.7 | 1.6  | 9.33E-01 | 4.90E-03 | 1.00E+00 | 1.71E-02 |
| 9230114K14Rik_chr5  | 1   | 0   | 1   | 2   | 0.0  | 1.0 | 1.0 | 2.1  | 8.15E-01 | 5.00E-05 | 1.00E+00 | 2.82E-04 |
| 9330159M07Rik_chr9  | 0   | 0   | 0   | 2   | 0.0  | 1.0 | 0.8 | 1.7  | 6.99E-01 | 2.82E-03 | 1.00E+00 | 1.05E-02 |
| 9330175E14Rik_chr8  | 3   | 3   | 5   | 8   | 0.0  | 1.0 | 0.6 | 1.6  | 9.78E-01 | 1.00E-04 | 1.00E+00 | 5.40E-04 |
| 9430037G07Rik_chr9  | 0   | 0   | 0   | 2   | 0.0  | 1.0 | 1.3 | 2.5  | 3.40E-01 | 5.00E-05 | 1.00E+00 | 2.82E-04 |
| A130077B15Rik_chr10 | 6   | 4   | 7   | 11  | -0.3 | 1.3 | 0.7 | 1.6  | 2.43E-01 | 5.00E-05 | 9.89E-01 | 2.82E-04 |
| A430005L14Rik_chr4  | 7   | 8   | 8   | 15  | 0.3  | 1.2 | 0.9 | 1.8  | 4.61E-01 | 5.00E-05 | 1.00E+00 | 2.85E-04 |
| A430033K04Rik_chr5  | 2   | 2   | 3   | 4   | 0.4  | 1.4 | 0.8 | 1.7  | 2.17E-01 | 5.00E-05 | 9.89E-01 | 2.85E-04 |
| A630019I02Rik_chr13 | 1   | 2   | 1   | 2   | 0.6  | 1.5 | 0.9 | 1.9  | 3.31E-02 | 3.70E-03 | 7.51E-01 | 1.33E-02 |
| A630089N07Rik_chr16 | 2   | 2   | 3   | 6   | -0.2 | 1.1 | 0.8 | 1.8  | 6.79E-01 | 5.00E-05 | 1.00E+00 | 2.82E-04 |
| A730008H23Rik_chr1  | 4   | 7   | 11  | 40  | 0.6  | 1.5 | 1.8 | 3.6  | 2.49E-01 | 5.00E-05 | 9.92E-01 | 2.85E-04 |
| A730036I17Rik_chr2  | 0   | 0   | 0   | 3   | 0.0  | 1.0 | 1.7 | 3.2  | 8.26E-01 | 5.00E-05 | 1.00E+00 | 2.82E-04 |
| AA986860_chr1       | 0   | 0   | 1   | 2   | 0.0  | 1.0 | 0.7 | 1.6  | 7.52E-01 | 5.00E-05 | 1.00E+00 | 2.85E-04 |
| Abca13_chr11        | 0   | 0   | 0   | 2   | 0.0  | 1.0 | 1.2 | 2.3  | 3.91E-01 | 5.00E-05 | 1.00E+00 | 2.85E-04 |
| Abcb9_chr5          | 1   | 1   | 2   | 4   | 0.2  | 1.2 | 0.9 | 1.8  | 5.56E-01 | 5.00E-05 | 1.00E+00 | 2.85E-04 |
| Abcc3_chr11         | 7   | 16  | 15  | 34  | 1.2  | 2.3 | 1.1 | 2.2  | 3.64E-08 | 5.00E-05 | 1.36E-05 | 2.85E-04 |
| Abhd4_chr14         | 7   | 9   | 8   | 11  | 0.3  | 1.3 | 0.6 | 1.5  | 1.90E-01 | 4.17E-02 | 9.87E-01 | 1.04E-01 |
| Abi3_chr11          | 9   | 13  | 0   | 5   | 0.5  | 1.4 | 2.4 | 5.2  | 7.67E-02 | 2.46E-02 | 8.98E-01 | 6.89E-02 |

|                |    |     |    |     |      |      |     |      |          |          |          |          |
|----------------|----|-----|----|-----|------|------|-----|------|----------|----------|----------|----------|
| Abrac1_chr10   | 44 | 44  | 35 | 57  | 0.0  | 1.0  | 0.7 | 1.6  | 9.87E-01 | 5.00E-05 | 1.00E+00 | 2.85E-04 |
| Acadl_chr1     | 16 | 25  | 23 | 35  | 0.6  | 1.6  | 0.6 | 1.5  | 4.78E-03 | 5.00E-05 | 3.40E-01 | 2.85E-04 |
| Acer3_chr7     | 9  | 7   | 11 | 21  | -0.2 | 1.2  | 1.0 | 1.9  | 3.50E-01 | 5.00E-05 | 9.98E-01 | 2.85E-04 |
| Acyp1_chr12    | 9  | 9   | 5  | 8   | 0.0  | 1.0  | 0.6 | 1.6  | 8.99E-01 | 1.90E-03 | 1.00E+00 | 7.48E-03 |
| Adam10_chr9    | 32 | 34  | 57 | 85  | 0.1  | 1.1  | 0.6 | 1.5  | 6.76E-01 | 4.50E-04 | 1.00E+00 | 2.12E-03 |
| Adam8_chr7     | 7  | 8   | 14 | 21  | 0.1  | 1.1  | 0.6 | 1.5  | 6.05E-01 | 1.00E-04 | 1.00E+00 | 5.44E-04 |
| Adamts5_chr16  | 2  | 2   | 4  | 5   | 0.1  | 1.1  | 0.6 | 1.5  | 7.94E-01 | 5.00E-05 | 1.00E+00 | 2.85E-04 |
| Adcy4_chr14    | 1  | 2   | 3  | 5   | 1.0  | 2.0  | 0.8 | 1.8  | 9.70E-03 | 5.00E-05 | 4.58E-01 | 2.85E-04 |
| Adcy6_chr15    | 7  | 6   | 15 | 26  | -0.1 | 1.1  | 0.9 | 1.8  | 5.15E-01 | 5.00E-05 | 1.00E+00 | 2.85E-04 |
| Add1_chr5      | 25 | 32  | 5  | 50  | 0.3  | 1.2  | 3.3 | 9.7  | 5.04E-01 | 5.00E-05 | 9.69E-01 | 3.08E-04 |
| Adipor1_chr1   | 38 | 51  | 82 | 161 | 0.4  | 1.3  | 1.0 | 2.0  | 5.16E-02 | 5.00E-05 | 8.48E-01 | 2.85E-04 |
| Adrb2_chr18    | 12 | 15  | 18 | 28  | 0.3  | 1.3  | 0.7 | 1.6  | 1.64E-01 | 5.00E-05 | 9.80E-01 | 2.85E-04 |
| AF251705_chr11 | 12 | 13  | 10 | 20  | 0.1  | 1.1  | 1.0 | 2.0  | 6.12E-01 | 5.00E-05 | 1.00E+00 | 2.85E-04 |
| Afmid_chr11    | 6  | 7   | 9  | 13  | 0.1  | 1.1  | 0.6 | 1.5  | 6.59E-01 | 1.64E-02 | 1.00E+00 | 4.73E-02 |
| Agap1_chr1     | 2  | 2   | 5  | 10  | 0.1  | 1.1  | 0.9 | 1.8  | 6.23E-01 | 5.00E-05 | 1.00E+00 | 2.85E-04 |
| Agfg2_chr5     | 3  | 4   | 6  | 15  | 0.3  | 1.2  | 1.2 | 2.4  | 5.28E-01 | 1.36E-04 | 1.00E+00 | 7.21E-04 |
| Agpat4_chr17   | 4  | 5   | 6  | 11  | 0.2  | 1.2  | 0.9 | 1.8  | 4.81E-01 | 5.00E-05 | 1.00E+00 | 2.85E-04 |
| Agtr1a_chr13   | 8  | 8   | 13 | 21  | -0.1 | 1.1  | 0.6 | 1.5  | 6.87E-01 | 5.00E-05 | 1.00E+00 | 2.85E-04 |
| Ahi1_chr10     | 1  | 1   | 2  | 4   | 0.2  | 1.1  | 0.9 | 1.9  | 6.60E-01 | 5.00E-05 | 1.00E+00 | 2.85E-04 |
| AI662270_chr11 | 55 | 65  | 43 | 101 | 0.2  | 1.2  | 1.2 | 2.3  | 2.64E-01 | 5.00E-05 | 9.91E-01 | 2.82E-04 |
| Aimp1_chr3     | 25 | 24  | 27 | 43  | -0.1 | 1.0  | 0.7 | 1.6  | 7.69E-01 | 5.00E-05 | 1.00E+00 | 2.85E-04 |
| Akap7_chr10    | 2  | 3   | 3  | 7   | 0.5  | 1.4  | 1.0 | 2.0  | 1.16E-01 | 5.00E-05 | 9.45E-01 | 2.85E-04 |
| Akip1_chr7     | 4  | 5   | 4  | 6   | 0.4  | 1.3  | 0.8 | 1.8  | 3.39E-01 | 5.00E-05 | 9.98E-01 | 2.85E-04 |
| Aldh18a1_chr19 | 4  | 6   | 10 | 15  | 0.4  | 1.3  | 0.6 | 1.5  | 3.66E-01 | 3.78E-02 | 9.02E-01 | 8.12E-02 |
| Aldh1a7_chr19  | 2  | 1   | 2  | 4   | -0.1 | 1.1  | 1.2 | 2.3  | 7.94E-01 | 5.00E-05 | 1.00E+00 | 2.85E-04 |
| Aldh3b1_chr19  | 8  | 8   | 11 | 18  | 0.1  | 1.1  | 0.6 | 1.5  | 7.72E-01 | 1.00E-04 | 1.00E+00 | 5.44E-04 |
| Alg6_chr4      | 3  | 3   | 3  | 5   | 0.0  | 1.0  | 0.6 | 1.5  | 9.70E-01 | 1.00E-04 | 1.00E+00 | 5.44E-04 |
| Alms1_chr6     | 1  | 1   | 2  | 5   | -0.2 | 1.2  | 1.0 | 2.1  | 4.93E-01 | 5.00E-05 | 1.00E+00 | 2.85E-04 |
| Alox12_chr11   | 3  | 6   | 7  | 11  | 0.8  | 1.8  | 0.7 | 1.7  | 4.75E-03 | 5.00E-05 | 3.40E-01 | 2.85E-04 |
| Als2cr12_chr1  | 1  | 1   | 1  | 2   | 0.0  | 1.0  | 0.8 | 1.7  | 7.95E-01 | 5.00E-05 | 1.00E+00 | 2.85E-04 |
| Alyref_chr11   | 17 | 20  | 24 | 46  | 0.3  | 1.2  | 0.9 | 1.9  | 2.66E-01 | 5.00E-05 | 9.94E-01 | 2.85E-04 |
| Amyg3_chr9     | 3  | 2   | 6  | 16  | -0.6 | 1.5  | 1.3 | 2.5  | 4.36E-01 | 3.67E-02 | 1.00E+00 | 9.25E-02 |
| Ammeccr1_chrX  | 3  | 3   | 7  | 20  | 0.0  | 1.0  | 1.6 | 3.0  | 9.07E-01 | 5.00E-05 | 1.00E+00 | 2.85E-04 |
| Amy2a5_chr3    | 0  | 0   | 0  | 79  | 0.0  | 1.0  | 6.3 | 79.1 | 7.90E-01 | 5.00E-05 | 1.00E+00 | 2.85E-04 |
| Ang_chr14      | 6  | 10  | 7  | 10  | 0.7  | 1.6  | 0.6 | 1.5  | 3.33E-02 | 8.50E-04 | 7.65E-01 | 3.58E-03 |
| Ank_chr15      | 7  | 8   | 15 | 31  | 0.3  | 1.2  | 1.1 | 2.1  | 2.79E-01 | 5.00E-05 | 9.94E-01 | 2.85E-04 |
| Ank1_chr8      | 1  | 1   | 1  | 40  | 0.3  | 1.2  | 4.2 | 18.2 | 2.26E-02 | 4.08E-03 | 5.47E-01 | 1.34E-02 |
| Ankrd2_chr19   | 1  | 1   | 1  | 2   | -0.1 | 1.0  | 0.7 | 1.7  | 9.11E-01 | 5.10E-03 | 1.00E+00 | 1.77E-02 |
| Anln_chr9      | 1  | 1   | 2  | 20  | -0.1 | 1.0  | 3.3 | 9.6  | 9.49E-01 | 5.00E-05 | 1.00E+00 | 2.85E-04 |
| Anp32b_chr4    | 69 | 102 | 85 | 177 | 0.6  | 1.5  | 1.1 | 2.1  | 7.01E-03 | 5.00E-05 | 3.94E-01 | 2.85E-04 |
| Anxa3_chr5     | 5  | 5   | 7  | 13  | -0.1 | 1.1  | 0.9 | 1.8  | 6.71E-01 | 5.00E-05 | 1.00E+00 | 2.85E-04 |
| Aoc2_chr11     | 3  | 3   | 5  | 11  | -0.1 | 1.1  | 1.1 | 2.1  | 7.29E-01 | 5.00E-05 | 1.00E+00 | 2.85E-04 |
| Ap1s1_chr5     | 12 | 14  | 15 | 24  | 0.2  | 1.1  | 0.7 | 1.7  | 5.60E-01 | 5.00E-05 | 1.00E+00 | 2.85E-04 |
| Ap1s2_chrX     | 7  | 6   | 9  | 14  | -0.2 | 1.1  | 0.6 | 1.5  | 4.31E-01 | 1.00E-04 | 1.00E+00 | 5.44E-04 |
| Ap2a2_chr7     | 11 | 13  | 24 | 40  | 0.2  | 1.2  | 0.7 | 1.6  | 2.94E-01 | 5.00E-05 | 9.96E-01 | 2.85E-04 |
| Apeh_chr9      | 20 | 26  | 38 | 61  | 0.4  | 1.3  | 0.7 | 1.6  | 7.71E-02 | 5.00E-05 | 9.03E-01 | 2.85E-04 |
| Apip_chr2      | 8  | 7   | 7  | 12  | -0.2 | 1.2  | 0.9 | 1.8  | 5.27E-01 | 5.00E-05 | 1.00E+00 | 2.85E-04 |
| Aptd1_chr4     | 2  | 6   | 2  | 7   | 1.8  | 3.4  | 2.0 | 3.9  | 1.20E-04 | 5.00E-05 | 2.47E-02 | 2.85E-04 |
| Aplf_chr6      | 2  | 2   | 2  | 5   | 0.3  | 1.2  | 1.1 | 2.1  | 5.45E-01 | 1.50E-04 | 1.00E+00 | 7.99E-04 |
| Apobec1_chr6   | 1  | 6   | 1  | 9   | 2.5  | 5.8  | 2.8 | 7.1  | 4.46E-03 | 5.00E-05 | 3.77E-01 | 3.24E-04 |
| Apobr_chr7     | 9  | 10  | 13 | 21  | 0.1  | 1.1  | 0.7 | 1.6  | 6.00E-01 | 5.00E-05 | 1.00E+00 | 2.85E-04 |
| Apol10b_chr15  | 1  | 2   | 2  | 9   | 0.8  | 1.7  | 2.5 | 5.5  | 6.61E-02 | 5.00E-05 | 8.76E-01 | 2.85E-04 |
| Apol7c_chr15   | 0  | 17  | 0  | 10  | 4.1  | 16.8 | 3.3 | 9.5  | 1.00E-20 | 5.00E-05 | 1.00E-20 | 2.85E-04 |
| Apol7e_chr15   | 0  | 2   | 0  | 10  | 1.3  | 2.4  | 3.4 | 10.3 | 1.28E-08 | 5.00E-05 | 9.63E-06 | 2.85E-04 |
| Apoo_chrX      | 2  | 2   | 1  | 3   | 0.3  | 1.2  | 1.3 | 2.5  | 6.89E-01 | 3.50E-04 | 1.00E+00 | 1.69E-03 |
| Arap3_chr18    | 3  | 3   | 6  | 9   | 0.3  | 1.2  | 0.8 | 1.8  | 4.04E-01 | 3.24E-03 | 9.90E-01 | 1.16E-02 |
| Arf5_chr6      | 20 | 29  | 33 | 71  | 0.5  | 1.5  | 1.1 | 2.2  | 3.18E-02 | 5.00E-05 | 7.58E-01 | 2.85E-04 |
| Arg2_chr12     | 0  | 0   | 0  | 3   | 0.0  | 1.0  | 1.3 | 2.5  | 8.97E-01 | 1.38E-02 | 1.00E+00 | 4.10E-02 |
| Arhgap11a_chr2 | 7  | 8   | 12 | 27  | 0.2  | 1.1  | 1.2 | 2.3  | 4.45E-01 | 5.00E-05 | 1.00E+00 | 2.85E-04 |
| Arhgap19_chr19 | 7  | 9   | 12 | 39  | 0.3  | 1.2  | 1.7 | 3.3  | 2.25E-01 | 5.00E-05 | 9.87E-01 | 2.85E-04 |
| Arhgap23_chr11 | 6  | 6   | 16 | 29  | 0.0  | 1.0  | 0.9 | 1.8  | 9.73E-01 | 5.00E-05 | 1.00E+00 | 2.85E-04 |
| Arhgap33_chr7  | 2  | 2   | 4  | 11  | 0.1  | 1.0  | 1.3 | 2.5  | 8.71E-01 | 5.00E-05 | 1.00E+00 | 2.85E-04 |
| Arhgef12_chr9  | 8  | 8   | 17 | 29  | 0.1  | 1.1  | 0.7 | 1.7  | 7.35E-01 | 5.00E-05 | 1.00E+00 | 2.85E-04 |
| Arl4a_chr12    | 4  | 4   | 4  | 13  | 0.0  | 1.0  | 1.6 | 2.9  | 8.77E-01 | 5.00E-05 | 1.00E+00 | 2.85E-04 |
| Arl5a_chr2     | 15 | 23  | 27 | 41  | 0.6  | 1.5  | 0.6 | 1.6  | 2.61E-03 | 2.50E-04 | 2.36E-01 | 1.25E-03 |
| Arl6ip6_chr2   | 9  | 10  | 11 | 20  | 0.1  | 1.1  | 0.8 | 1.8  | 6.32E-01 | 5.00E-05 | 1.00E+00 | 2.85E-04 |
| Arrb1_chr7     | 13 | 14  | 29 | 62  | 0.0  | 1.0  | 1.1 | 2.2  | 9.40E-01 | 1.87E-03 | 1.00E+00 | 6.95E-03 |
| Asap3_chr4     | 1  | 1   | 1  | 2   | 0.1  | 1.1  | 0.9 | 1.8  | 1.87E-02 | 5.00E-05 | 6.08E-01 | 2.85E-04 |
| Asb1_chr1      | 5  | 5   | 6  | 19  | 0.0  | 1.0  | 1.7 | 3.3  | 8.52E-01 | 5.13E-03 | 1.00E+00 | 1.62E-02 |
| Aspa_chr11     | 1  | 1   | 1  | 2   | -0.1 | 1.0  | 0.7 | 1.7  | 1.88E-01 | 1.65E-03 | 9.86E-01 | 6.61E-03 |
| Atad2_chr15    | 10 | 10  | 16 | 41  | 0.1  | 1.1  | 1.3 | 2.5  | 6.70E-01 | 5.00E-05 | 1.00E+00 | 2.85E-04 |
| Atat1_chr17    | 2  | 3   | 3  | 5   | 0.2  | 1.1  | 0.7 | 1.7  | 7.17E-01 | 9.78E-03 | 1.00E+00 | 2.85E-02 |
| Atg4a_chr3     | 8  | 9   | 10 | 31  | 0.1  | 1.1  | 1.6 | 3.0  | 5.78E-01 | 5.00E-05 | 1.00E+00 | 2.85E-04 |
| Atg4d_chr9     | 5  | 6   | 9  | 20  | 0.2  | 1.2  | 1.1 | 2.1  | 6.46E-01 | 4.00E-04 | 1.00E+00 | 1.91E-03 |
| Atg9a_chr1     | 6  | 7   | 14 | 24  | 0.2  | 1.2  | 0.8 | 1.8  | 3.05E-01 | 5.00E-05 | 9.96E-01 | 2.85E-04 |
| Atp1a3_chr7    | 2  | 3   | 7  | 12  | 0.3  | 1.2  | 0.8 | 1.8  | 4.18E-01 | 5.00E-05 | 1.00E+00 | 2.85E-04 |
| Atp1b2_chr11   | 3  | 4   | 5  | 13  | 0.7  | 1.7  | 1.4 | 2.6  | 2.01E-02 | 5.00E-05 | 6.33E-01 | 2.85E-04 |
| Atp5f1_chr3    | 58 | 62  | 57 | 96  | 0.1  | 1.1  | 0.7 | 1.7  | 7.52E-01 | 3.00E-04 | 1.00E+00 | 1.47E-03 |
| Atp5g1_chr11   | 13 | 16  | 2  | 7   | 0.3  | 1.2  | 1.5 | 2.9  | 4.63E-01 | 6.00E-04 | 1.00E+00 | 2.86E-03 |
| Atp5g3_chr2    | 58 | 76  | 49 | 74  | 0.4  | 1.3  | 0.6 | 1.5  | 7.19E-02 | 5.00E-05 | 8.92E-01 | 2.85E-04 |
| Atp5j_chr16    | 40 | 43  | 31 | 60  | 0.1  | 1.1  | 1.0 | 1.9  | 8.01E-01 | 6.80E-03 | 1.00E+00 | 2.25E-02 |

|                     |       |       |     |       |      |      |     |      |          |          |          |          |
|---------------------|-------|-------|-----|-------|------|------|-----|------|----------|----------|----------|----------|
| Atp5j2_chr5         | 54    | 54    | 31  | 64    | 0.0  | 1.0  | 1.1 | 2.1  | 9.82E-01 | 5.00E-05 | 1.00E+00 | 2.85E-04 |
| Atp5k_chr5          | 56    | 58    | 30  | 56    | 0.1  | 1.0  | 0.9 | 1.8  | 8.30E-01 | 5.00E-05 | 1.00E+00 | 2.85E-04 |
| Atp5l_chr9          | 90    | 84    | 50  | 97    | -0.1 | 1.1  | 1.0 | 1.9  | 6.40E-01 | 5.00E-05 | 1.00E+00 | 2.85E-04 |
| Atp6v0a1_chr11      | 7     | 10    | 15  | 25    | 0.4  | 1.4  | 0.8 | 1.7  | 1.71E-01 | 2.00E-03 | 9.42E-01 | 7.93E-03 |
| Atp6v0e_chr17       | 54    | 58    | 52  | 81    | 0.1  | 1.1  | 0.6 | 1.6  | 6.10E-01 | 5.00E-05 | 1.00E+00 | 2.85E-04 |
| AU021092_chr16      | 3     | 6     | 4   | 14    | 1.0  | 2.1  | 1.7 | 3.2  | 4.96E-03 | 5.00E-05 | 2.56E-01 | 2.85E-04 |
| AW112010_chr19      | 46    | 57    | 28  | 99    | 0.3  | 1.2  | 1.8 | 3.6  | 1.98E-01 | 5.00E-05 | 9.87E-01 | 2.85E-04 |
| Azin1_chr15         | 17    | 19    | 6   | 22    | 0.2  | 1.1  | 1.8 | 3.4  | 5.04E-01 | 5.00E-05 | 1.00E+00 | 3.24E-04 |
| B2m_chr2            | 1,043 | 1,243 | 743 | 1,258 | 0.3  | 1.2  | 0.8 | 1.7  | 4.45E-01 | 5.00E-05 | 1.00E+00 | 2.85E-04 |
| B3gnt3_chr8         | 0     | 1     | 0   | 4     | 0.0  | 1.0  | 1.9 | 3.7  | 1.46E-04 | 5.00E-05 | 2.93E-02 | 2.85E-04 |
| B4galt3_chr1        | 7     | 11    | 11  | 17    | 0.6  | 1.5  | 0.6 | 1.5  | 2.41E-02 | 2.00E-04 | 6.72E-01 | 1.02E-03 |
| Baiap3_chr17        | 1     | 1     | 2   | 4     | 0.3  | 1.2  | 0.9 | 1.9  | 5.14E-01 | 5.00E-05 | 1.00E+00 | 2.85E-04 |
| Batf2_chr19         | 1     | 1     | 1   | 3     | 0.0  | 1.0  | 1.2 | 2.3  | 4.86E-01 | 5.00E-05 | 1.00E+00 | 2.85E-04 |
| Batf3_chr1          | 2     | 4     | 3   | 4     | 0.6  | 1.5  | 0.6 | 1.5  | 2.37E-01 | 6.55E-03 | 9.92E-01 | 2.19E-02 |
| Bbc3_chr7           | 2     | 2     | 3   | 6     | -0.1 | 1.1  | 0.8 | 1.8  | 8.21E-01 | 5.00E-05 | 1.00E+00 | 2.85E-04 |
| BC018473_chr11      | 0     | 26    | 0   | 69    | 4.7  | 26.3 | 6.1 | 68.6 | 2.22E-16 | 5.00E-05 | 3.64E-13 | 2.82E-04 |
| BC021614_chr19      | 1     | 2     | 2   | 3     | 0.3  | 1.2  | 0.7 | 1.6  | 6.85E-01 | 9.70E-03 | 1.00E+00 | 3.05E-02 |
| BC030307_chr10      | 0     | 1     | 1   | 2     | 0.0  | 1.0  | 0.7 | 1.7  | 8.95E-01 | 1.00E-04 | 1.00E+00 | 4.76E-04 |
| BC055324_chr1       | 2     | 2     | 3   | 6     | 0.2  | 1.2  | 0.9 | 1.9  | 7.37E-01 | 3.29E-02 | 1.00E+00 | 8.45E-02 |
| BC147527_chr13      | 8     | 8     | 10  | 16    | 0.1  | 1.1  | 0.6 | 1.5  | 7.50E-01 | 5.00E-05 | 1.00E+00 | 2.85E-04 |
| Bcap29_chr12        | 16    | 17    | 13  | 19    | 0.0  | 1.0  | 0.6 | 1.5  | 8.46E-01 | 1.57E-02 | 1.00E+00 | 4.03E-02 |
| Bcl2a1d_chr9        | 7     | 7     | 6   | 15    | 0.1  | 1.1  | 1.4 | 2.7  | 7.46E-01 | 5.00E-05 | 1.00E+00 | 2.85E-04 |
| Bcor1_chrX          | 1     | 2     | 3   | 6     | 0.5  | 1.5  | 0.9 | 1.9  | 9.72E-02 | 5.00E-05 | 9.33E-01 | 2.85E-04 |
| Bend4_chr5          | 1     | 1     | 1   | 3     | 0.0  | 1.0  | 1.2 | 2.3  | 3.98E-01 | 5.00E-05 | 1.00E+00 | 2.85E-04 |
| Bet1_chr6           | 11    | 12    | 10  | 16    | 0.1  | 1.1  | 0.6 | 1.5  | 6.92E-01 | 1.50E-04 | 1.00E+00 | 7.89E-04 |
| Bex6_chr16          | 3     | 4     | 4   | 9     | 0.3  | 1.2  | 1.1 | 2.1  | 4.76E-01 | 5.00E-05 | 1.00E+00 | 2.85E-04 |
| Blvra_chr2          | 12    | 13    | 12  | 21    | 0.1  | 1.1  | 0.7 | 1.7  | 6.36E-01 | 5.00E-05 | 1.00E+00 | 2.85E-04 |
| Bnip3l_chr14        | 57    | 59    | 97  | 213   | 0.0  | 1.0  | 1.1 | 2.2  | 8.25E-01 | 5.00E-05 | 1.00E+00 | 2.85E-04 |
| Bola3_chr6          | 9     | 10    | 8   | 23    | 0.2  | 1.1  | 1.5 | 2.8  | 6.29E-01 | 5.00E-05 | 1.00E+00 | 2.85E-04 |
| Brpf3_chr17         | 7     | 7     | 15  | 36    | 0.1  | 1.1  | 1.3 | 2.4  | 6.62E-01 | 5.00E-05 | 1.00E+00 | 2.85E-04 |
| Bsdcl1_chr4         | 15    | 20    | 31  | 77    | 0.4  | 1.3  | 1.3 | 2.4  | 9.86E-02 | 5.00E-05 | 9.35E-01 | 2.85E-04 |
| Bsn_chr9            | 0     | 1     | 1   | 2     | 0.0  | 1.0  | 1.2 | 2.3  | 9.84E-03 | 5.00E-05 | 4.59E-01 | 2.85E-04 |
| Bst2_chr8           | 28    | 36    | 24  | 38    | 0.4  | 1.3  | 0.7 | 1.6  | 1.45E-01 | 5.00E-05 | 9.68E-01 | 2.85E-04 |
| Btnl4_chr17         | 1     | 1     | 1   | 5     | 0.0  | 1.0  | 2.0 | 4.0  | 8.39E-01 | 5.00E-05 | 1.00E+00 | 2.85E-04 |
| Btnl6_chr17         | 1     | 1     | 2   | 8     | 0.1  | 1.1  | 2.3 | 4.9  | 8.02E-01 | 5.00E-05 | 1.00E+00 | 2.85E-04 |
| Bzrap1_chr11        | 1     | 2     | 2   | 5     | 0.7  | 1.7  | 1.3 | 2.5  | 1.82E-02 | 5.00E-05 | 6.01E-01 | 2.85E-04 |
| C130050O18Rik_chr5  | 1     | 1     | 2   | 5     | 0.3  | 1.2  | 1.4 | 2.6  | 7.66E-01 | 2.64E-02 | 1.00E+00 | 7.05E-02 |
| C130083M11Rik_chr5  | 0     | 0     | 1   | 2     | 0.0  | 1.0  | 0.7 | 1.6  | 9.71E-01 | 5.00E-05 | 1.00E+00 | 2.82E-04 |
| C1d_chr11           | 10    | 9     | 8   | 15    | -0.1 | 1.1  | 1.0 | 2.0  | 5.75E-01 | 5.00E-05 | 1.00E+00 | 2.85E-04 |
| C1galt1c1_chrX      | 9     | 9     | 8   | 17    | -0.1 | 1.0  | 1.1 | 2.1  | 8.47E-01 | 5.00E-05 | 1.00E+00 | 2.85E-04 |
| C330018D20Rik_chr18 | 5     | 5     | 5   | 9     | 0.0  | 1.0  | 0.9 | 1.8  | 9.68E-01 | 5.00E-05 | 1.00E+00 | 2.85E-04 |
| Cacna1g_chr11       | 0     | 0     | 0   | 4     | 0.0  | 1.0  | 1.8 | 3.6  | 3.75E-01 | 5.00E-05 | 1.00E+00 | 2.61E-04 |
| Cacybp_chr1         | 21    | 22    | 24  | 42    | 0.1  | 1.1  | 0.8 | 1.7  | 6.69E-01 | 5.00E-05 | 1.00E+00 | 2.85E-04 |
| Cadm3_chr1          | 1     | 2     | 2   | 5     | 1.2  | 2.2  | 1.5 | 2.7  | 1.23E-03 | 5.00E-05 | 1.42E-01 | 2.85E-04 |
| Calm2_chr17         | 128   | 138   | 130 | 209   | 0.1  | 1.1  | 0.7 | 1.6  | 6.02E-01 | 5.00E-05 | 1.00E+00 | 2.85E-04 |
| Camk2b_chr11        | 1     | 2     | 1   | 2     | 0.8  | 1.8  | 0.7 | 1.6  | 6.88E-02 | 1.63E-03 | 8.23E-01 | 6.60E-03 |
| Capn11_chr17        | 0     | 0     | 0   | 2     | 0.0  | 1.0  | 1.1 | 2.1  | 9.81E-01 | 5.00E-05 | 1.00E+00 | 2.85E-04 |
| Capn5_chr7          | 2     | 3     | 5   | 11    | 0.2  | 1.1  | 1.1 | 2.1  | 5.17E-01 | 5.00E-05 | 1.00E+00 | 2.85E-04 |
| Cars_chr7           | 6     | 7     | 7   | 14    | 0.1  | 1.1  | 1.0 | 2.0  | 7.03E-01 | 4.52E-03 | 1.00E+00 | 1.45E-02 |
| Casp12_chr9         | 3     | 2     | 3   | 5     | -0.2 | 1.1  | 0.7 | 1.6  | 6.10E-01 | 5.00E-05 | 1.00E+00 | 2.85E-04 |
| Casp3_chr8          | 12    | 12    | 16  | 33    | 0.0  | 1.0  | 1.0 | 2.0  | 9.52E-01 | 5.00E-05 | 1.00E+00 | 2.85E-04 |
| Cass4_chr2          | 1     | 1     | 2   | 4     | 0.2  | 1.1  | 0.9 | 1.9  | 3.86E-01 | 5.00E-05 | 1.00E+00 | 2.85E-04 |
| Cat_chr2            | 30    | 43    | 48  | 73    | 0.5  | 1.4  | 0.6 | 1.5  | 1.37E-02 | 5.00E-05 | 5.30E-01 | 2.85E-04 |
| Cbr4_chr8           | 4     | 4     | 3   | 5     | 0.0  | 1.0  | 0.6 | 1.5  | 9.90E-01 | 1.10E-03 | 1.00E+00 | 4.65E-03 |
| Cbwd1_chr19         | 3     | 3     | 3   | 6     | 0.2  | 1.1  | 0.8 | 1.8  | 6.99E-01 | 1.25E-04 | 1.00E+00 | 6.83E-04 |
| Cbx3_chr6           | 60    | 67    | 69  | 110   | 0.2  | 1.1  | 0.7 | 1.6  | 3.97E-01 | 5.00E-05 | 1.00E+00 | 2.85E-04 |
| Ccdc23_chr4         | 9     | 12    | 7   | 15    | 0.3  | 1.2  | 1.0 | 2.0  | 3.65E-01 | 5.00E-05 | 1.00E+00 | 2.85E-04 |
| Ccdc57_chr11        | 0     | 0     | 1   | 2     | 0.0  | 1.0  | 0.7 | 1.6  | 8.98E-01 | 5.00E-05 | 1.00E+00 | 2.85E-04 |
| Ccdc62_chr5         | 1     | 1     | 1   | 2     | 0.0  | 1.0  | 0.7 | 1.6  | 5.37E-01 | 5.00E-05 | 1.00E+00 | 2.85E-04 |
| Ccdc71l_chr12       | 10    | 11    | 15  | 26    | 0.1  | 1.1  | 0.8 | 1.7  | 5.51E-01 | 5.00E-05 | 1.00E+00 | 2.85E-04 |
| Cchcr1_chr17        | 2     | 2     | 3   | 8     | 0.4  | 1.3  | 1.5 | 2.8  | 3.09E-01 | 5.00E-05 | 9.97E-01 | 2.85E-04 |
| Ccnd3_chr17         | 3     | 10    | 14  | 64    | 1.6  | 3.0  | 2.2 | 4.7  | 7.01E-03 | 5.00E-05 | 4.19E-01 | 2.99E-04 |
| Ccne2_chr4          | 1     | 0     | 1   | 11    | 0.0  | 1.0  | 3.2 | 9.4  | 8.44E-01 | 1.52E-02 | 1.00E+00 | 3.99E-02 |
| Ccnyl1_chr1         | 3     | 4     | 5   | 9     | 0.2  | 1.2  | 1.0 | 2.0  | 4.57E-01 | 5.00E-05 | 1.00E+00 | 2.85E-04 |
| Ccsap_chr8          | 1     | 2     | 3   | 4     | 0.1  | 1.1  | 0.6 | 1.5  | 7.48E-01 | 5.50E-04 | 1.00E+00 | 2.52E-03 |
| Cd101_chr3          | 2     | 2     | 3   | 8     | 0.4  | 1.3  | 1.4 | 2.6  | 3.23E-01 | 5.00E-05 | 9.90E-01 | 2.85E-04 |
| Cd1d2_chr3          | 1     | 1     | 1   | 6     | 0.1  | 1.1  | 2.5 | 5.7  | 2.75E-01 | 5.00E-05 | 9.92E-01 | 2.85E-04 |
| Cd200r1_chr16       | 4     | 4     | 6   | 10    | 0.0  | 1.0  | 0.9 | 1.8  | 9.70E-01 | 5.00E-05 | 1.00E+00 | 2.85E-04 |
| Cd209c_chr8         | 2     | 3     | 3   | 7     | 0.5  | 1.4  | 1.1 | 2.1  | 2.00E-01 | 5.00E-05 | 9.87E-01 | 2.85E-04 |
| Cd244_chr1          | 7     | 7     | 10  | 23    | 0.1  | 1.0  | 1.2 | 2.2  | 7.75E-01 | 5.00E-05 | 1.00E+00 | 2.85E-04 |
| Cd300a_chr11        | 10    | 11    | 14  | 24    | 0.2  | 1.2  | 0.8 | 1.7  | 2.90E-01 | 5.00E-05 | 9.96E-01 | 2.85E-04 |
| Cd302_chr2          | 12    | 12    | 11  | 17    | 0.0  | 1.0  | 0.7 | 1.6  | 9.33E-01 | 5.00E-05 | 1.00E+00 | 2.85E-04 |
| Cd47_chr16          | 35    | 39    | 64  | 98    | 0.2  | 1.1  | 0.6 | 1.5  | 4.55E-01 | 1.00E-04 | 1.00E+00 | 5.44E-04 |
| Cd68_chr11          | 14    | 25    | 21  | 35    | 0.9  | 1.8  | 0.7 | 1.7  | 7.03E-04 | 5.00E-05 | 1.01E-01 | 2.85E-04 |
| Cdc123_chr2         | 17    | 21    | 19  | 30    | 0.2  | 1.2  | 0.6 | 1.5  | 3.05E-01 | 5.00E-05 | 9.96E-01 | 2.85E-04 |
| Cdc25a_chr9         | 4     | 5     | 7   | 12    | 0.4  | 1.3  | 0.8 | 1.7  | 1.67E-01 | 5.00E-05 | 9.80E-01 | 2.85E-04 |
| Cdc25b_chr2         | 10    | 14    | 22  | 46    | 0.5  | 1.4  | 1.1 | 2.1  | 4.10E-01 | 2.70E-02 | 9.95E-01 | 7.14E-02 |
| Cdc34_chr10         | 10    | 12    | 13  | 21    | 0.3  | 1.2  | 0.6 | 1.5  | 3.50E-01 | 1.50E-04 | 9.98E-01 | 7.89E-04 |
| Cdc45_chr16         | 2     | 3     | 3   | 16    | 0.4  | 1.3  | 2.4 | 5.2  | 3.44E-01 | 5.00E-05 | 1.00E+00 | 2.85E-04 |
| Cdc7_chr5           | 6     | 7     | 9   | 14    | 0.1  | 1.0  | 0.6 | 1.5  | 7.98E-01 | 5.00E-05 | 1.00E+00 | 2.85E-04 |
| Cdca4_chr12         | 12    | 13    | 16  | 26    | 0.2  | 1.1  | 0.7 | 1.6  | 3.96E-01 | 5.00E-05 | 1.00E+00 | 2.85E-04 |

|                     |     |     |     |     |      |     |     |      |          |          |          |          |
|---------------------|-----|-----|-----|-----|------|-----|-----|------|----------|----------|----------|----------|
| Cdca7_chr2          | 5   | 7   | 9   | 19  | 0.5  | 1.4 | 1.1 | 2.2  | 1.05E-01 | 5.00E-05 | 9.38E-01 | 2.85E-04 |
| Cdca7l_chr12        | 4   | 5   | 7   | 11  | 0.2  | 1.2 | 0.6 | 1.5  | 5.15E-01 | 1.00E-04 | 1.00E+00 | 5.44E-04 |
| Cdpc1_chr15         | 3   | 4   | 3   | 6   | 0.4  | 1.3 | 0.9 | 1.8  | 5.29E-01 | 8.75E-05 | 1.00E+00 | 4.94E-04 |
| Cdt1_chr8           | 7   | 11  | 15  | 27  | 0.6  | 1.5 | 0.8 | 1.8  | 2.23E-02 | 5.00E-05 | 6.61E-01 | 2.85E-04 |
| Ceacam16_chr7       | 3   | 5   | 4   | 14  | 1.0  | 1.9 | 1.6 | 3.1  | 8.36E-03 | 5.00E-05 | 3.39E-01 | 2.85E-04 |
| Cecr2_chr6          | 3   | 7   | 6   | 9   | 1.1  | 2.2 | 0.6 | 1.5  | 7.62E-07 | 5.00E-05 | 3.53E-04 | 2.85E-04 |
| Celsr1_chr15        | 1   | 1   | 2   | 4   | 0.0  | 1.0 | 0.9 | 1.8  | 2.18E-01 | 5.00E-05 | 9.89E-01 | 2.85E-04 |
| Cenpc1_chr5         | 7   | 7   | 10  | 18  | 0.1  | 1.0 | 0.8 | 1.7  | 8.34E-01 | 5.00E-05 | 1.00E+00 | 2.85E-04 |
| Cenpk_chr13         | 1   | 1   | 1   | 8   | 0.0  | 1.0 | 2.9 | 7.7  | 7.22E-01 | 5.00E-05 | 1.00E+00 | 2.90E-04 |
| Cenpm_chr15         | 1   | 1   | 1   | 3   | 0.0  | 1.0 | 1.7 | 3.2  | 6.65E-01 | 5.00E-05 | 1.00E+00 | 2.61E-04 |
| Cenpp_chr13         | 1   | 1   | 1   | 11  | -0.2 | 1.2 | 3.3 | 10.1 | 8.17E-01 | 5.00E-05 | 1.00E+00 | 2.85E-04 |
| Cenpq_chr17         | 9   | 9   | 10  | 21  | -0.1 | 1.1 | 1.1 | 2.1  | 7.89E-01 | 5.00E-05 | 1.00E+00 | 2.85E-04 |
| Cenpt_chr8          | 3   | 4   | 5   | 8   | 0.3  | 1.2 | 0.7 | 1.7  | 4.15E-01 | 5.00E-05 | 1.00E+00 | 2.85E-04 |
| Cenpu_chr8          | 1   | 1   | 1   | 3   | 0.0  | 1.0 | 1.8 | 3.4  | 8.80E-01 | 5.90E-03 | 1.00E+00 | 2.00E-02 |
| Cenpw_chr10         | 1   | 1   | 1   | 4   | 0.0  | 1.0 | 2.0 | 3.9  | 5.75E-01 | 5.00E-05 | 1.00E+00 | 2.85E-04 |
| Cep128_chr12        | 3   | 3   | 5   | 11  | 0.1  | 1.0 | 1.1 | 2.2  | 8.07E-01 | 5.00E-05 | 1.00E+00 | 2.85E-04 |
| Cep290_chr10        | 1   | 1   | 2   | 10  | 0.1  | 1.1 | 2.4 | 5.1  | 7.23E-01 | 5.00E-05 | 1.00E+00 | 2.85E-04 |
| Cep55_chr19         | 2   | 2   | 2   | 5   | 0.1  | 1.1 | 1.1 | 2.2  | 7.69E-01 | 5.00E-05 | 1.00E+00 | 2.82E-04 |
| Cep70_chr9          | 4   | 4   | 5   | 11  | -0.1 | 1.1 | 1.0 | 2.0  | 7.15E-01 | 5.00E-05 | 1.00E+00 | 2.85E-04 |
| Cep72_chr13         | 2   | 2   | 2   | 4   | -0.1 | 1.1 | 0.6 | 1.5  | 8.28E-01 | 2.50E-04 | 1.00E+00 | 1.25E-03 |
| Cep85_chr4          | 4   | 4   | 7   | 12  | 0.0  | 1.0 | 0.8 | 1.7  | 9.76E-01 | 5.00E-05 | 1.00E+00 | 2.85E-04 |
| Cetn3_chr13         | 29  | 29  | 22  | 41  | 0.0  | 1.0 | 0.9 | 1.8  | 9.14E-01 | 5.00E-05 | 1.00E+00 | 2.85E-04 |
| Cgrrf1_chr14        | 5   | 5   | 6   | 10  | -0.1 | 1.1 | 0.8 | 1.7  | 7.91E-01 | 5.00E-05 | 1.00E+00 | 2.85E-04 |
| Chac1_chr2          | 0   | 0   | 0   | 2   | 0.0  | 1.0 | 0.7 | 1.7  | 5.91E-01 | 5.00E-05 | 1.00E+00 | 2.85E-04 |
| Chac2_chr11         | 3   | 3   | 3   | 21  | 0.1  | 1.1 | 3.1 | 8.4  | 8.22E-01 | 5.00E-05 | 1.00E+00 | 2.85E-04 |
| Chchd1_chr14        | 18  | 18  | 13  | 28  | 0.0  | 1.0 | 1.1 | 2.1  | 9.16E-01 | 5.00E-05 | 1.00E+00 | 2.85E-04 |
| Chek2_chr5          | 4   | 4   | 6   | 13  | 0.1  | 1.1 | 1.2 | 2.2  | 7.99E-01 | 5.00E-05 | 1.00E+00 | 2.85E-04 |
| Chst1_chr2          | 3   | 6   | 8   | 13  | 0.8  | 1.7 | 0.7 | 1.6  | 6.14E-03 | 5.00E-05 | 3.72E-01 | 2.85E-04 |
| Cir1_chr2           | 17  | 16  | 16  | 31  | -0.2 | 1.1 | 1.0 | 1.9  | 4.95E-01 | 5.00E-05 | 1.00E+00 | 2.85E-04 |
| Cited4_chr4         | 0   | 0   | 0   | 2   | 0.0  | 1.0 | 1.2 | 2.4  | 3.83E-01 | 5.00E-05 | 1.00E+00 | 2.85E-04 |
| Citcn3_chr8         | 4   | 4   | 2   | 17  | 0.2  | 1.1 | 3.3 | 9.7  | 7.32E-01 | 5.00E-05 | 1.00E+00 | 3.01E-04 |
| Clec4a1_chr6        | 11  | 12  | 12  | 21  | 0.2  | 1.1 | 0.8 | 1.8  | 4.88E-01 | 5.00E-05 | 1.00E+00 | 2.85E-04 |
| Clec4a4_chr6        | 3   | 5   | 3   | 6   | 0.8  | 1.8 | 1.1 | 2.2  | 4.60E-02 | 5.00E-05 | 8.37E-01 | 2.85E-04 |
| Clec4b1_chr6        | 2   | 2   | 1   | 3   | -0.3 | 1.2 | 1.4 | 2.6  | 6.92E-01 | 1.00E-04 | 1.00E+00 | 5.57E-04 |
| Clec4n_chr6         | 36  | 29  | 38  | 78  | -0.3 | 1.2 | 1.0 | 2.0  | 4.05E-01 | 2.29E-02 | 9.91E-01 | 5.46E-02 |
| Cln8_chr8           | 4   | 4   | 8   | 17  | 0.0  | 1.0 | 1.2 | 2.2  | 9.67E-01 | 5.00E-05 | 1.00E+00 | 2.85E-04 |
| Clybl_chr14         | 3   | 4   | 3   | 6   | 0.2  | 1.1 | 0.7 | 1.7  | 7.14E-01 | 1.50E-04 | 1.00E+00 | 7.89E-04 |
| Cmbl_chr15          | 2   | 3   | 2   | 5   | 0.5  | 1.4 | 1.1 | 2.2  | 3.16E-01 | 5.00E-05 | 9.97E-01 | 2.85E-04 |
| Cmc2_chr8           | 2   | 3   | 2   | 5   | 0.6  | 1.5 | 1.1 | 2.2  | 1.77E-01 | 5.00E-05 | 9.84E-01 | 2.85E-04 |
| Cmpk2_chr12         | 3   | 5   | 6   | 28  | 0.5  | 1.4 | 2.2 | 4.4  | 6.40E-02 | 5.00E-05 | 8.76E-01 | 2.85E-04 |
| Cnm2_chr19          | 1   | 1   | 2   | 7   | 0.0  | 1.0 | 1.5 | 2.9  | 8.35E-01 | 5.00E-05 | 1.00E+00 | 3.08E-04 |
| Cnpy2_chr10         | 12  | 12  | 12  | 19  | 0.1  | 1.1 | 0.6 | 1.5  | 7.62E-01 | 1.50E-04 | 1.00E+00 | 7.89E-04 |
| Coa6_chr8           | 7   | 6   | 5   | 8   | -0.3 | 1.3 | 0.7 | 1.6  | 4.20E-01 | 6.00E-04 | 1.00E+00 | 2.73E-03 |
| Commd3_chr2         | 22  | 21  | 17  | 29  | -0.1 | 1.0 | 0.8 | 1.7  | 7.95E-01 | 5.00E-05 | 1.00E+00 | 2.85E-04 |
| Cops2_chr2          | 19  | 18  | 23  | 42  | -0.1 | 1.1 | 0.9 | 1.8  | 6.55E-01 | 5.00E-05 | 1.00E+00 | 2.85E-04 |
| Cops5_chr1          | 19  | 20  | 21  | 34  | 0.1  | 1.1 | 0.7 | 1.6  | 6.62E-01 | 5.00E-05 | 1.00E+00 | 2.85E-04 |
| Coq7_chr7           | 3   | 4   | 3   | 5   | 0.2  | 1.2 | 0.7 | 1.6  | 6.04E-01 | 8.00E-04 | 1.00E+00 | 3.53E-03 |
| Coro2b_chr9         | 1   | 1   | 1   | 2   | 0.0  | 1.0 | 0.7 | 1.6  | 1.94E-01 | 3.00E-04 | 9.87E-01 | 1.47E-03 |
| Cox11_chr11         | 3   | 3   | 4   | 6   | -0.1 | 1.0 | 0.7 | 1.7  | 8.47E-01 | 1.53E-02 | 1.00E+00 | 4.48E-02 |
| Cox17_chr16         | 28  | 35  | 21  | 34  | 0.3  | 1.3 | 0.7 | 1.6  | 2.22E-01 | 5.00E-05 | 9.91E-01 | 2.85E-04 |
| Cox5a_chr9          | 28  | 38  | 21  | 34  | 0.4  | 1.4 | 0.7 | 1.6  | 7.60E-02 | 1.00E-04 | 9.03E-01 | 5.44E-04 |
| Cox6c_chr15         | 78  | 75  | 45  | 102 | -0.1 | 1.0 | 1.2 | 2.3  | 8.07E-01 | 5.00E-05 | 1.00E+00 | 2.85E-04 |
| Cox7a2_chr9         | 28  | 26  | 15  | 35  | -0.1 | 1.0 | 1.2 | 2.3  | 8.20E-01 | 5.00E-05 | 1.00E+00 | 2.85E-04 |
| Cox7b_chrX          | 35  | 30  | 17  | 40  | -0.2 | 1.1 | 1.2 | 2.3  | 4.23E-01 | 5.00E-05 | 1.00E+00 | 2.85E-04 |
| Cox7c_chr13         | 70  | 73  | 43  | 80  | 0.1  | 1.0 | 0.9 | 1.9  | 7.82E-01 | 5.00E-05 | 1.00E+00 | 2.85E-04 |
| Cpeb4_chr11         | 7   | 7   | 16  | 42  | -0.2 | 1.1 | 1.4 | 2.6  | 5.71E-01 | 5.00E-05 | 1.00E+00 | 2.85E-04 |
| Cpq_chr15           | 12  | 14  | 16  | 27  | 0.2  | 1.1 | 0.7 | 1.6  | 5.54E-01 | 5.00E-05 | 1.00E+00 | 2.85E-04 |
| Crat_chr2           | 4   | 5   | 8   | 15  | 0.2  | 1.1 | 0.9 | 1.9  | 5.72E-01 | 5.00E-05 | 1.00E+00 | 2.85E-04 |
| Creb3l1_chr2        | 1   | 2   | 2   | 3   | 1.1  | 2.2 | 0.6 | 1.6  | 1.87E-03 | 7.50E-04 | 1.88E-01 | 3.33E-03 |
| Crls1_chr2          | 5   | 5   | 4   | 6   | 0.0  | 1.0 | 0.7 | 1.6  | 9.37E-01 | 3.63E-02 | 1.00E+00 | 8.07E-02 |
| Csf2ra_chr19        | 12  | 16  | 20  | 36  | 0.4  | 1.3 | 0.8 | 1.8  | 8.57E-02 | 5.00E-05 | 9.18E-01 | 2.85E-04 |
| Csf2rb_chr15        | 15  | 16  | 31  | 57  | 0.1  | 1.1 | 0.9 | 1.8  | 6.04E-01 | 5.00E-05 | 1.00E+00 | 2.85E-04 |
| Ctla2a_chr13        | 17  | 19  | 7   | 20  | 0.2  | 1.1 | 1.4 | 2.7  | 5.15E-01 | 6.26E-03 | 1.00E+00 | 1.92E-02 |
| Ctla2b_chr13        | 4   | 5   | 4   | 14  | 0.1  | 1.1 | 1.7 | 3.3  | 7.96E-01 | 5.00E-05 | 1.00E+00 | 2.85E-04 |
| Ctnnd2_chr15        | 0   | 1   | 0   | 3   | 0.0  | 1.0 | 1.8 | 3.5  | 8.42E-10 | 5.00E-05 | 1.00E-06 | 2.85E-04 |
| Ctrc_chr4           | 2   | 1   | 1   | 40  | -0.8 | 1.7 | 5.0 | 31.9 | 1.49E-01 | 5.00E-05 | 9.03E-01 | 2.85E-04 |
| Ctsb_chr14          | 106 | 147 | 184 | 318 | 0.5  | 1.4 | 0.8 | 1.7  | 9.12E-02 | 4.00E-04 | 9.27E-01 | 1.91E-03 |
| Ctsd_chr7           | 113 | 140 | 186 | 351 | 0.3  | 1.2 | 0.9 | 1.9  | 1.76E-01 | 5.00E-05 | 9.84E-01 | 2.85E-04 |
| Ctsh_chr9           | 51  | 60  | 58  | 87  | 0.2  | 1.2 | 0.6 | 1.5  | 2.44E-01 | 2.00E-04 | 9.92E-01 | 1.02E-03 |
| Cttnbp2_chr6        | 1   | 1   | 1   | 2   | 0.0  | 1.0 | 0.6 | 1.6  | 5.63E-01 | 3.50E-04 | 1.00E+00 | 1.69E-03 |
| Cul4a_chr8          | 15  | 16  | 27  | 64  | 0.1  | 1.1 | 1.3 | 2.4  | 5.33E-01 | 5.00E-05 | 1.00E+00 | 2.85E-04 |
| Cuzd1_chr7          | 0   | 0   | 0   | 3   | 0.0  | 1.0 | 1.7 | 3.1  | 3.39E-01 | 5.00E-05 | 1.00E+00 | 2.85E-04 |
| Cyb5a_chr18         | 42  | 47  | 34  | 72  | 0.2  | 1.1 | 1.1 | 2.1  | 4.74E-01 | 5.00E-05 | 1.00E+00 | 2.85E-04 |
| Cycs_chr6           | 14  | 14  | 11  | 23  | 0.0  | 1.0 | 1.1 | 2.1  | 9.93E-01 | 5.00E-05 | 1.00E+00 | 2.85E-04 |
| Cygb_chr11          | 3   | 12  | 5   | 17  | 1.9  | 3.7 | 1.7 | 3.2  | 4.11E-11 | 5.00E-05 | 3.59E-08 | 2.85E-04 |
| Cyp4b1-ps2_chr4     | 0   | 1   | 0   | 6   | 0.0  | 1.0 | 2.6 | 6.2  | 3.33E-01 | 5.00E-05 | 9.97E-01 | 2.82E-04 |
| Cyp4f16_chr17       | 10  | 20  | 15  | 27  | 1.0  | 2.0 | 0.8 | 1.7  | 2.71E-05 | 5.00E-05 | 6.68E-03 | 2.85E-04 |
| Cysltr1_chrX        | 1   | 1   | 1   | 2   | 0.0  | 1.0 | 1.1 | 2.1  | 8.88E-01 | 5.00E-05 | 1.00E+00 | 2.85E-04 |
| D030056L22Rik_chr19 | 5   | 7   | 7   | 17  | 0.3  | 1.3 | 1.3 | 2.4  | 2.72E-01 | 5.00E-05 | 9.94E-01 | 2.85E-04 |
| D17Wsu92e_chr17     | 16  | 19  | 32  | 47  | 0.2  | 1.2 | 0.6 | 1.5  | 4.34E-01 | 2.18E-02 | 9.98E-01 | 5.52E-02 |
| Daam1_chr12         | 4   | 4   | 8   | 14  | -0.1 | 1.0 | 0.8 | 1.7  | 7.06E-01 | 1.64E-02 | 1.00E+00 | 3.87E-02 |

|                     |    |    |    |     |      |     |     |      |          |          |          |          |
|---------------------|----|----|----|-----|------|-----|-----|------|----------|----------|----------|----------|
| Dbf4_chr5           | 5  | 5  | 7  | 21  | 0.0  | 1.0 | 1.7 | 3.2  | 9.48E-01 | 5.00E-05 | 1.00E+00 | 2.85E-04 |
| Dcaf12_chr4         | 23 | 31 | 44 | 71  | 0.4  | 1.4 | 0.7 | 1.6  | 3.44E-02 | 5.00E-05 | 7.66E-01 | 2.85E-04 |
| Dcaf6_chr1          | 8  | 9  | 14 | 30  | 0.1  | 1.1 | 1.1 | 2.1  | 6.80E-01 | 5.00E-05 | 1.00E+00 | 2.85E-04 |
| Dck_chr5            | 14 | 17 | 22 | 60  | 0.3  | 1.2 | 1.4 | 2.7  | 2.01E-01 | 5.00E-05 | 9.87E-01 | 2.85E-04 |
| Dclk2_chr3          | 4  | 5  | 0  | 4   | 0.2  | 1.2 | 1.9 | 3.8  | 4.90E-01 | 1.66E-02 | 1.00E+00 | 5.10E-02 |
| Dclre1b_chr3        | 4  | 4  | 6  | 12  | 0.0  | 1.0 | 0.8 | 1.8  | 9.31E-01 | 5.00E-05 | 1.00E+00 | 2.85E-04 |
| Dctpp1_chr7         | 5  | 6  | 5  | 9   | 0.2  | 1.1 | 0.7 | 1.6  | 6.93E-01 | 7.50E-04 | 1.00E+00 | 3.33E-03 |
| Dcun1d5_chr9        | 23 | 23 | 23 | 36  | 0.0  | 1.0 | 0.6 | 1.5  | 9.72E-01 | 1.50E-04 | 1.00E+00 | 7.89E-04 |
| Ddx60_chr8          | 3  | 3  | 5  | 11  | 0.1  | 1.1 | 1.2 | 2.4  | 7.25E-01 | 5.00E-05 | 1.00E+00 | 2.85E-04 |
| Def8_chr8           | 3  | 3  | 3  | 7   | 0.3  | 1.2 | 1.1 | 2.1  | 4.49E-01 | 1.44E-02 | 1.00E+00 | 3.95E-02 |
| Dennd4a_chr9        | 19 | 25 | 35 | 57  | 0.4  | 1.3 | 0.7 | 1.6  | 7.44E-02 | 5.00E-05 | 7.99E-01 | 2.85E-04 |
| Depdc1a_chr3        | 1  | 1  | 1  | 18  | -0.1 | 1.1 | 3.4 | 10.5 | 6.75E-01 | 5.00E-05 | 1.00E+00 | 2.92E-04 |
| Dgkg_chr16          | 0  | 0  | 1  | 2   | 0.0  | 1.0 | 0.8 | 1.7  | 6.52E-01 | 5.00E-05 | 1.00E+00 | 2.85E-04 |
| Dhfr_chr13          | 1  | 1  | 1  | 6   | -0.1 | 1.1 | 2.2 | 4.5  | 8.36E-01 | 5.00E-05 | 1.00E+00 | 2.85E-04 |
| Dhrs13_chr11        | 1  | 1  | 1  | 2   | 0.0  | 1.0 | 0.9 | 1.9  | 1.85E-01 | 5.00E-05 | 9.86E-01 | 2.85E-04 |
| Dhrs3_chr4          | 3  | 8  | 5  | 10  | 1.1  | 2.1 | 0.9 | 1.9  | 6.08E-02 | 3.59E-02 | 4.31E-01 | 7.96E-02 |
| Dhx58_chr11         | 5  | 7  | 8  | 20  | 0.4  | 1.3 | 1.2 | 2.4  | 1.82E-01 | 5.00E-05 | 9.85E-01 | 2.85E-04 |
| Disc1_chr8          | 1  | 1  | 2  | 3   | 0.0  | 1.0 | 0.8 | 1.7  | 5.94E-01 | 5.00E-05 | 1.00E+00 | 2.85E-04 |
| Dmbt1_chr7          | 0  | 0  | 0  | 11  | 0.0  | 1.0 | 3.4 | 10.8 | 6.09E-01 | 5.00E-05 | 1.00E+00 | 2.85E-04 |
| Dmwd_chr7           | 3  | 4  | 7  | 11  | 0.3  | 1.2 | 0.6 | 1.6  | 3.98E-01 | 5.00E-05 | 1.00E+00 | 2.85E-04 |
| Dnaaf2_chr12        | 3  | 3  | 4  | 7   | 0.2  | 1.1 | 0.8 | 1.7  | 6.14E-01 | 1.30E-03 | 1.00E+00 | 5.38E-03 |
| Dnaaf3_chr7         | 3  | 4  | 4  | 6   | 0.7  | 1.7 | 0.6 | 1.5  | 3.18E-02 | 1.50E-04 | 7.58E-01 | 7.89E-04 |
| Dnaja4_chr9         | 2  | 3  | 4  | 13  | 0.5  | 1.4 | 1.5 | 2.9  | 1.22E-01 | 5.00E-05 | 9.50E-01 | 2.85E-04 |
| Dnajib13_chr7       | 1  | 1  | 1  | 2   | 0.0  | 1.0 | 1.0 | 2.1  | 5.79E-01 | 5.00E-05 | 1.00E+00 | 2.85E-04 |
| Dnajib2_chr1        | 4  | 5  | 4  | 16  | 0.4  | 1.3 | 2.1 | 4.4  | 3.88E-01 | 5.00E-05 | 9.95E-01 | 2.97E-04 |
| Dnajib3_chr1        | 0  | 0  | 0  | 2   | 0.0  | 1.0 | 0.8 | 1.7  | 9.00E-01 | 3.21E-02 | 1.00E+00 | 8.28E-02 |
| Dnajib4_chr3        | 10 | 12 | 13 | 26  | 0.2  | 1.1 | 1.0 | 2.0  | 4.11E-01 | 5.00E-05 | 1.00E+00 | 2.85E-04 |
| Dnajc15_chr14       | 10 | 12 | 8  | 16  | 0.3  | 1.2 | 1.0 | 1.9  | 3.95E-01 | 5.00E-05 | 1.00E+00 | 2.85E-04 |
| Dnase111_chrX       | 6  | 6  | 7  | 10  | 0.1  | 1.0 | 0.6 | 1.5  | 8.54E-01 | 5.50E-04 | 1.00E+00 | 2.52E-03 |
| Dnmt1_chr9          | 13 | 16 | 27 | 43  | 0.3  | 1.2 | 0.7 | 1.6  | 3.43E-01 | 5.79E-03 | 9.86E-01 | 1.96E-02 |
| Dnph1_chr17         | 1  | 1  | 1  | 3   | 0.0  | 1.0 | 1.5 | 2.9  | 8.43E-01 | 5.00E-05 | 1.00E+00 | 2.85E-04 |
| Dock4_chr12         | 3  | 3  | 6  | 9   | 0.1  | 1.1 | 0.6 | 1.5  | 5.71E-01 | 5.00E-05 | 1.00E+00 | 2.85E-04 |
| Dpy30_chr17         | 12 | 14 | 9  | 15  | 0.3  | 1.2 | 0.7 | 1.6  | 4.32E-01 | 5.00E-05 | 1.00E+00 | 2.85E-04 |
| Dsn1_chr2           | 4  | 4  | 6  | 14  | 0.1  | 1.1 | 1.3 | 2.5  | 6.58E-01 | 5.00E-05 | 1.00E+00 | 2.85E-04 |
| Dtymk_chr1          | 13 | 15 | 17 | 28  | 0.2  | 1.1 | 0.7 | 1.6  | 6.36E-01 | 3.58E-03 | 1.00E+00 | 1.21E-02 |
| Dut_chr2            | 5  | 5  | 3  | 9   | 0.2  | 1.1 | 1.6 | 3.1  | 5.95E-01 | 5.00E-05 | 1.00E+00 | 2.97E-04 |
| Dynlt1a_chr17       | 3  | 2  | 2  | 4   | -0.3 | 1.2 | 0.9 | 1.8  | 5.75E-01 | 5.00E-04 | 1.00E+00 | 2.32E-03 |
| Dysf_chr6           | 3  | 4  | 7  | 12  | 0.5  | 1.5 | 0.7 | 1.7  | 3.02E-02 | 5.00E-05 | 7.32E-01 | 2.85E-04 |
| E230016M11Rik_chr6  | 1  | 1  | 1  | 2   | 0.0  | 1.0 | 0.9 | 1.8  | 9.26E-01 | 1.11E-02 | 1.00E+00 | 3.39E-02 |
| E2f4_chr8           | 28 | 35 | 54 | 111 | 0.3  | 1.3 | 1.0 | 2.1  | 1.11E-01 | 5.00E-05 | 9.39E-01 | 2.85E-04 |
| Eef1e1_chr13        | 12 | 14 | 13 | 23  | 0.2  | 1.1 | 0.9 | 1.8  | 4.77E-01 | 5.00E-05 | 1.00E+00 | 2.85E-04 |
| Eef2k_chr7          | 4  | 5  | 8  | 15  | 0.4  | 1.3 | 0.9 | 1.8  | 3.03E-01 | 1.03E-03 | 9.67E-01 | 4.23E-03 |
| Efcab11_chr12       | 0  | 0  | 0  | 2   | 0.0  | 1.0 | 0.6 | 1.5  | 7.06E-01 | 5.00E-05 | 1.00E+00 | 2.85E-04 |
| Ehbp111_chr19       | 9  | 12 | 18 | 37  | 0.4  | 1.4 | 1.1 | 2.1  | 3.57E-01 | 2.74E-03 | 9.89E-01 | 1.00E-02 |
| Eif2ak1_chr5        | 16 | 22 | 29 | 76  | 0.5  | 1.4 | 1.4 | 2.6  | 5.52E-02 | 5.00E-05 | 8.54E-01 | 2.85E-04 |
| Eif2ak2_chr17       | 4  | 5  | 6  | 23  | 0.1  | 1.1 | 2.0 | 3.9  | 7.00E-01 | 5.00E-05 | 1.00E+00 | 2.85E-04 |
| Eif2s1_chr12        | 18 | 18 | 22 | 35  | 0.0  | 1.0 | 0.7 | 1.6  | 9.03E-01 | 5.00E-05 | 1.00E+00 | 2.85E-04 |
| Eif2s2_chr2         | 32 | 32 | 29 | 56  | 0.0  | 1.0 | 1.0 | 1.9  | 9.97E-01 | 5.00E-05 | 1.00E+00 | 2.85E-04 |
| Eif3j1_chr2         | 21 | 23 | 25 | 41  | 0.1  | 1.1 | 0.7 | 1.7  | 6.86E-01 | 4.90E-03 | 1.00E+00 | 1.75E-02 |
| Eif3j2_chr2         | 21 | 23 | 25 | 41  | 0.1  | 1.1 | 0.7 | 1.7  | 6.86E-01 | 4.90E-03 | 1.00E+00 | 1.75E-02 |
| Eif4e_chr3          | 19 | 19 | 22 | 38  | 0.0  | 1.0 | 0.8 | 1.7  | 8.72E-01 | 5.00E-05 | 1.00E+00 | 2.85E-04 |
| Ell2_chr13          | 11 | 13 | 17 | 30  | 0.3  | 1.2 | 0.8 | 1.7  | 2.51E-01 | 5.00E-05 | 9.92E-01 | 2.85E-04 |
| Emc2_chr15          | 23 | 23 | 20 | 33  | 0.0  | 1.0 | 0.7 | 1.6  | 9.53E-01 | 5.00E-05 | 1.00E+00 | 2.85E-04 |
| Eme1_chr11          | 1  | 1  | 2  | 9   | 0.2  | 1.2 | 2.5 | 5.7  | 7.25E-01 | 8.50E-04 | 1.00E+00 | 3.72E-03 |
| Emr1_chr17          | 21 | 33 | 40 | 64  | 0.6  | 1.5 | 0.7 | 1.6  | 4.78E-03 | 5.00E-05 | 2.52E-01 | 2.85E-04 |
| Endod1_chr9         | 6  | 6  | 11 | 26  | 0.0  | 1.0 | 1.2 | 2.3  | 8.39E-01 | 5.00E-05 | 1.00E+00 | 2.85E-04 |
| Enkd1_chr8          | 1  | 1  | 1  | 3   | 0.0  | 1.0 | 1.4 | 2.6  | 6.83E-01 | 5.00E-05 | 1.00E+00 | 2.85E-04 |
| Eno1b_chr18         | 8  | 26 | 17 | 27  | 1.6  | 3.1 | 0.7 | 1.7  | 3.63E-11 | 5.00E-05 | 8.70E-08 | 2.97E-04 |
| Epb4.1_chr4         | 9  | 16 | 34 | 126 | 0.9  | 1.8 | 2.1 | 4.4  | 2.33E-01 | 8.64E-04 | 6.46E-01 | 3.58E-03 |
| Epb4.1l3_chr17      | 5  | 7  | 10 | 17  | 0.3  | 1.3 | 0.7 | 1.7  | 1.94E-01 | 5.00E-05 | 9.48E-01 | 2.85E-04 |
| Ercc6l_chrX         | 2  | 2  | 3  | 10  | 0.0  | 1.0 | 1.7 | 3.2  | 8.86E-01 | 5.00E-05 | 1.00E+00 | 2.85E-04 |
| Ergic2_chr6         | 11 | 10 | 14 | 23  | -0.3 | 1.2 | 0.9 | 1.8  | 6.56E-01 | 1.25E-02 | 1.00E+00 | 3.64E-02 |
| Erh_chr12           | 35 | 40 | 31 | 58  | 0.2  | 1.2 | 0.9 | 1.9  | 3.84E-01 | 5.00E-05 | 1.00E+00 | 2.85E-04 |
| Eri1_chr8           | 9  | 10 | 14 | 23  | 0.0  | 1.0 | 0.7 | 1.6  | 9.54E-01 | 5.00E-05 | 1.00E+00 | 2.85E-04 |
| Erp27_chr6          | 1  | 1  | 1  | 2   | 0.0  | 1.0 | 1.0 | 1.9  | 5.06E-01 | 5.00E-05 | 1.00E+00 | 2.85E-04 |
| Esd_chr14           | 13 | 18 | 12 | 31  | 0.5  | 1.4 | 1.3 | 2.5  | 4.19E-02 | 5.00E-05 | 8.13E-01 | 2.85E-04 |
| Etfb_chr7           | 23 | 26 | 23 | 38  | 0.2  | 1.1 | 0.7 | 1.6  | 4.35E-01 | 5.00E-05 | 1.00E+00 | 2.85E-04 |
| Ethe1_chr7          | 3  | 4  | 3  | 6   | 0.3  | 1.2 | 0.9 | 1.8  | 4.21E-01 | 5.00E-05 | 1.00E+00 | 2.85E-04 |
| Evi5_chr5           | 5  | 4  | 8  | 20  | -0.2 | 1.1 | 1.2 | 2.3  | 4.48E-01 | 5.00E-05 | 1.00E+00 | 2.85E-04 |
| Exosc8_chr3         | 14 | 16 | 13 | 21  | 0.2  | 1.2 | 0.7 | 1.6  | 4.39E-01 | 5.00E-05 | 1.00E+00 | 2.85E-04 |
| Ezh2_chr6           | 9  | 10 | 12 | 36  | 0.1  | 1.1 | 1.6 | 2.9  | 6.09E-01 | 5.00E-05 | 1.00E+00 | 2.85E-04 |
| F8_chrX             | 2  | 1  | 3  | 4   | -0.4 | 1.3 | 0.7 | 1.6  | 3.02E-01 | 5.00E-05 | 9.86E-01 | 2.85E-04 |
| F830016B08Rik_chr18 | 1  | 1  | 3  | 8   | -0.5 | 1.5 | 1.5 | 2.9  | 6.19E-02 | 5.00E-05 | 7.70E-01 | 2.85E-04 |
| Fam126a_chr5        | 10 | 11 | 17 | 32  | 0.1  | 1.1 | 0.9 | 1.8  | 6.19E-01 | 5.00E-05 | 1.00E+00 | 2.85E-04 |
| Fam212a_chr9        | 2  | 2  | 2  | 6   | 0.2  | 1.2 | 1.3 | 2.5  | 6.15E-01 | 5.00E-05 | 1.00E+00 | 2.85E-04 |
| Fam214b_chr4        | 4  | 5  | 5  | 18  | 0.3  | 1.3 | 1.7 | 3.3  | 4.45E-01 | 5.00E-05 | 9.98E-01 | 3.07E-04 |
| Fam216a_chr5        | 3  | 4  | 3  | 6   | 0.3  | 1.2 | 0.7 | 1.7  | 5.67E-01 | 3.50E-04 | 1.00E+00 | 1.69E-03 |
| Fam220a_chr5        | 11 | 17 | 2  | 6   | 0.5  | 1.4 | 1.5 | 2.9  | 1.41E-01 | 1.30E-02 | 7.40E-01 | 4.33E-02 |
| Fam53b_chr7         | 10 | 11 | 11 | 35  | 0.2  | 1.1 | 1.7 | 3.2  | 4.61E-01 | 5.00E-05 | 1.00E+00 | 2.99E-04 |
| Fam64a_chr11        | 1  | 1  | 1  | 3   | 0.0  | 1.0 | 1.6 | 3.0  | 8.30E-01 | 5.00E-05 | 1.00E+00 | 2.85E-04 |
| Fam96a_chr9         | 17 | 20 | 17 | 26  | 0.3  | 1.2 | 0.6 | 1.5  | 2.21E-01 | 2.50E-04 | 9.90E-01 | 1.25E-03 |

|               |    |    |    |     |      |     |     |      |          |          |          |          |
|---------------|----|----|----|-----|------|-----|-----|------|----------|----------|----------|----------|
| Fanca_chr8    | 2  | 2  | 3  | 13  | 0.0  | 1.0 | 2.0 | 3.9  | 9.76E-01 | 5.00E-05 | 1.00E+00 | 2.85E-04 |
| Fancb_chrX    | 2  | 2  | 3  | 5   | -0.1 | 1.1 | 0.6 | 1.5  | 7.64E-01 | 7.75E-04 | 1.00E+00 | 3.31E-03 |
| Fanci_chr7    | 1  | 1  | 2  | 6   | -0.1 | 1.0 | 1.7 | 3.3  | 9.41E-01 | 7.55E-03 | 1.00E+00 | 2.46E-02 |
| Fancl_chr11   | 4  | 5  | 5  | 8   | 0.1  | 1.1 | 0.7 | 1.7  | 8.10E-01 | 1.91E-02 | 1.00E+00 | 5.39E-02 |
| Fbxo10_chr4   | 1  | 1  | 3  | 5   | 0.1  | 1.1 | 0.7 | 1.6  | 7.57E-01 | 5.00E-05 | 1.00E+00 | 2.85E-04 |
| Fbxo30_chr10  | 4  | 3  | 6  | 27  | -0.2 | 1.1 | 2.2 | 4.7  | 5.09E-01 | 5.00E-05 | 1.00E+00 | 2.85E-04 |
| Fbxo34_chr14  | 4  | 5  | 2  | 5   | 0.4  | 1.3 | 1.6 | 3.1  | 2.01E-01 | 3.31E-02 | 9.74E-01 | 9.02E-02 |
| Fbxo42_chr4   | 5  | 7  | 12 | 20  | 0.3  | 1.2 | 0.7 | 1.6  | 2.32E-01 | 5.00E-05 | 9.91E-01 | 2.85E-04 |
| Fbxo48_chr11  | 2  | 2  | 2  | 6   | -0.1 | 1.1 | 1.5 | 2.8  | 8.68E-01 | 5.00E-05 | 1.00E+00 | 2.85E-04 |
| Fbxo6_chr4    | 3  | 4  | 2  | 5   | 0.5  | 1.4 | 1.7 | 3.3  | 4.59E-01 | 3.00E-04 | 9.94E-01 | 1.67E-03 |
| Fbxo7_chr10   | 8  | 10 | 12 | 27  | 0.2  | 1.2 | 1.2 | 2.2  | 3.67E-01 | 5.00E-05 | 9.99E-01 | 2.85E-04 |
| Fbxo9_chr9    | 9  | 10 | 14 | 26  | 0.1  | 1.1 | 0.9 | 1.9  | 5.25E-01 | 1.21E-03 | 1.00E+00 | 4.78E-03 |
| Fcer1g_chr1   | 37 | 56 | 25 | 72  | 0.6  | 1.5 | 1.5 | 2.9  | 1.37E-02 | 5.00E-05 | 5.30E-01 | 2.85E-04 |
| Fcf1_chr12    | 24 | 25 | 16 | 28  | 0.0  | 1.0 | 0.8 | 1.7  | 9.16E-01 | 5.00E-05 | 1.00E+00 | 2.85E-04 |
| Fcna_chr2     | 62 | 88 | 83 | 126 | 0.5  | 1.4 | 0.6 | 1.5  | 1.79E-02 | 5.00E-05 | 4.97E-01 | 2.85E-04 |
| Fes_chr7      | 13 | 17 | 25 | 39  | 0.3  | 1.2 | 0.7 | 1.6  | 1.58E-01 | 5.00E-05 | 9.76E-01 | 2.85E-04 |
| Fgl2_chr5     | 24 | 22 | 39 | 63  | -0.1 | 1.1 | 0.7 | 1.6  | 4.99E-01 | 5.00E-05 | 1.00E+00 | 2.85E-04 |
| Fgr_chr4      | 17 | 22 | 32 | 50  | 0.3  | 1.3 | 0.6 | 1.6  | 1.01E-01 | 5.00E-05 | 9.37E-01 | 2.85E-04 |
| Figl1_chr11   | 3  | 4  | 4  | 18  | 0.2  | 1.1 | 2.4 | 5.3  | 6.54E-01 | 5.00E-05 | 1.00E+00 | 2.93E-04 |
| Fopnl_chr16   | 14 | 14 | 14 | 23  | 0.0  | 1.0 | 0.8 | 1.7  | 9.50E-01 | 5.00E-05 | 1.00E+00 | 2.85E-04 |
| Foxd2os_chr4  | 1  | 1  | 1  | 2   | 0.0  | 1.0 | 0.9 | 1.9  | 7.70E-01 | 5.00E-05 | 1.00E+00 | 2.82E-04 |
| Foxo3_chr10   | 8  | 9  | 28 | 59  | 0.1  | 1.1 | 1.1 | 2.1  | 6.85E-01 | 5.00E-05 | 1.00E+00 | 2.85E-04 |
| Frmd4a_chr2   | 2  | 3  | 5  | 18  | 0.2  | 1.2 | 2.0 | 4.0  | 5.18E-01 | 5.00E-05 | 1.00E+00 | 2.97E-04 |
| Fsd1l_chr4    | 0  | 0  | 1  | 2   | 0.0  | 1.0 | 0.8 | 1.7  | 3.62E-01 | 5.00E-05 | 9.98E-01 | 2.85E-04 |
| Ftsj1_chrX    | 2  | 2  | 3  | 5   | 0.2  | 1.2 | 0.9 | 1.8  | 5.66E-01 | 5.00E-05 | 1.00E+00 | 2.85E-04 |
| Fundc2_chrX   | 8  | 8  | 9  | 16  | 0.0  | 1.0 | 0.8 | 1.8  | 9.97E-01 | 5.00E-05 | 1.00E+00 | 2.85E-04 |
| Fuom_chr7     | 1  | 1  | 1  | 2   | -0.2 | 1.2 | 0.8 | 1.7  | 4.24E-01 | 9.15E-03 | 1.00E+00 | 2.90E-02 |
| Fut1_chr7     | 0  | 0  | 0  | 3   | 0.0  | 1.0 | 1.5 | 2.9  | 5.47E-01 | 5.00E-05 | 1.00E+00 | 2.85E-04 |
| Fxn_chr19     | 3  | 3  | 3  | 7   | 0.2  | 1.2 | 1.1 | 2.1  | 6.07E-01 | 5.00E-05 | 1.00E+00 | 2.85E-04 |
| G2e3_chr12    | 7  | 5  | 10 | 15  | -0.4 | 1.3 | 0.6 | 1.5  | 8.41E-02 | 2.00E-04 | 8.62E-01 | 1.05E-03 |
| G6b_chr17_v1  | 1  | 2  | 2  | 4   | 0.8  | 1.8 | 1.1 | 2.1  | 1.22E-01 | 5.00E-05 | 9.12E-01 | 2.85E-04 |
| Gale_chr4     | 2  | 2  | 2  | 4   | 0.4  | 1.4 | 0.8 | 1.8  | 3.48E-01 | 5.00E-05 | 9.98E-01 | 2.85E-04 |
| Gas2l1_chr11  | 2  | 3  | 5  | 9   | 0.5  | 1.4 | 0.7 | 1.6  | 2.96E-01 | 1.64E-02 | 9.93E-01 | 4.43E-02 |
| Gas5_chr1_v1  | 33 | 35 | 30 | 45  | 0.1  | 1.1 | 0.6 | 1.5  | 7.27E-01 | 5.00E-05 | 1.00E+00 | 2.82E-04 |
| Gbgt1_chr2    | 1  | 1  | 3  | 5   | 0.1  | 1.1 | 0.9 | 1.8  | 8.30E-01 | 5.00E-05 | 1.00E+00 | 2.85E-04 |
| Gbp10_chr5    | 0  | 0  | 1  | 4   | 0.0  | 1.0 | 2.0 | 3.9  | 7.98E-01 | 5.00E-05 | 1.00E+00 | 2.85E-04 |
| Gbp2_chr3     | 13 | 11 | 19 | 33  | -0.2 | 1.1 | 0.8 | 1.7  | 4.18E-01 | 5.00E-05 | 1.00E+00 | 2.85E-04 |
| Gbp2b_chr3    | 0  | 4  | 0  | 31  | 1.9  | 3.8 | 4.9 | 30.8 | 6.77E-14 | 5.00E-05 | 6.83E-11 | 2.85E-04 |
| Gbp6_chr5     | 4  | 3  | 5  | 15  | -0.1 | 1.0 | 1.6 | 2.9  | 8.23E-01 | 5.00E-05 | 1.00E+00 | 2.85E-04 |
| Gbp7_chr3     | 14 | 12 | 19 | 40  | -0.2 | 1.2 | 1.1 | 2.1  | 2.74E-01 | 5.00E-05 | 9.93E-01 | 2.85E-04 |
| Gbp8_chr5     | 18 | 18 | 23 | 46  | -0.1 | 1.0 | 1.0 | 2.0  | 8.05E-01 | 5.00E-05 | 1.00E+00 | 2.85E-04 |
| Gch1_chr14    | 3  | 3  | 4  | 13  | 0.1  | 1.0 | 1.7 | 3.2  | 8.35E-01 | 5.00E-05 | 1.00E+00 | 2.85E-04 |
| Gclc_chr9     | 16 | 16 | 27 | 53  | 0.0  | 1.0 | 1.0 | 2.0  | 9.70E-01 | 5.00E-05 | 1.00E+00 | 2.85E-04 |
| Gcnt2_chr13   | 2  | 2  | 4  | 16  | 0.0  | 1.0 | 1.9 | 3.8  | 9.13E-01 | 5.00E-05 | 1.00E+00 | 2.85E-04 |
| Gdpc2_chrX    | 22 | 29 | 34 | 61  | 0.4  | 1.3 | 0.8 | 1.8  | 6.23E-02 | 5.00E-05 | 7.70E-01 | 2.85E-04 |
| Gemin6_chr17  | 4  | 4  | 4  | 8   | 0.2  | 1.1 | 1.1 | 2.1  | 6.72E-01 | 5.00E-05 | 1.00E+00 | 2.85E-04 |
| Ggh_chr4      | 6  | 3  | 7  | 18  | -0.8 | 1.7 | 1.4 | 2.7  | 4.18E-02 | 5.00E-05 | 8.13E-01 | 2.85E-04 |
| Gid8_chr2     | 13 | 15 | 21 | 41  | 0.2  | 1.1 | 1.0 | 2.0  | 4.30E-01 | 5.00E-05 | 1.00E+00 | 2.85E-04 |
| Gins1_chr2    | 2  | 2  | 1  | 7   | 0.3  | 1.2 | 2.3 | 4.9  | 6.25E-01 | 2.33E-04 | 1.00E+00 | 1.17E-03 |
| Gins3_chr8    | 3  | 3  | 4  | 8   | 0.1  | 1.1 | 1.0 | 2.1  | 8.13E-01 | 5.00E-05 | 1.00E+00 | 2.85E-04 |
| Gm10872_chr15 | 0  | 0  | 0  | 2   | 0.0  | 1.0 | 0.9 | 1.9  | 6.72E-01 | 5.00E-05 | 1.00E+00 | 2.82E-04 |
| Gm11127_chr17 | 1  | 1  | 2  | 3   | 0.1  | 1.1 | 0.7 | 1.6  | 8.69E-01 | 9.05E-03 | 1.00E+00 | 2.87E-02 |
| Gm12185_chr11 | 1  | 1  | 1  | 3   | 0.0  | 1.0 | 1.4 | 2.6  | 6.18E-01 | 5.00E-05 | 1.00E+00 | 2.85E-04 |
| Gm12250_chr11 | 5  | 5  | 8  | 25  | 0.1  | 1.1 | 1.6 | 3.1  | 6.42E-01 | 5.00E-05 | 1.00E+00 | 2.85E-04 |
| Gm13154_chr4  | 0  | 1  | 0  | 2   | 0.0  | 1.0 | 0.7 | 1.6  | 2.05E-04 | 5.00E-05 | 3.84E-02 | 2.85E-04 |
| Gm14005_chr2  | 3  | 3  | 2  | 5   | 0.0  | 1.0 | 1.0 | 2.1  | 9.76E-01 | 1.19E-03 | 1.00E+00 | 5.13E-03 |
| Gm14446_chr19 | 2  | 3  | 2  | 10  | 0.6  | 1.5 | 2.5 | 5.6  | 1.80E-01 | 5.00E-05 | 9.70E-01 | 2.90E-04 |
| Gm15800_chr5  | 7  | 6  | 19 | 41  | -0.3 | 1.2 | 1.1 | 2.2  | 2.17E-01 | 5.00E-05 | 9.56E-01 | 2.85E-04 |
| Gm1976_chr17  | 2  | 1  | 2  | 4   | -0.6 | 1.6 | 1.1 | 2.1  | 2.59E-01 | 5.00E-05 | 9.97E-01 | 2.82E-04 |
| Gm2382_chr9   | 9  | 9  | 7  | 11  | 0.0  | 1.0 | 0.6 | 1.6  | 9.40E-01 | 4.00E-04 | 1.00E+00 | 1.91E-03 |
| Gm3604_chr13  | 2  | 1  | 2  | 5   | -0.7 | 1.6 | 1.0 | 2.0  | 9.90E-02 | 5.00E-05 | 9.35E-01 | 2.85E-04 |
| Gm3893_chr4   | 1  | 0  | 2  | 3   | 0.0  | 1.0 | 0.7 | 1.6  | 3.36E-01 | 4.13E-02 | 9.97E-01 | 1.02E-01 |
| Gm4070_chr7   | 2  | 1  | 1  | 9   | -0.2 | 1.2 | 2.8 | 6.8  | 1.00E+00 | 5.00E-05 | 1.00E+00 | 2.92E-04 |
| Gm4349_chr3   | 0  | 0  | 0  | 2   | 0.0  | 1.0 | 0.8 | 1.7  | 9.69E-01 | 5.00E-05 | 1.00E+00 | 2.82E-04 |
| Gm4951_chr18  | 3  | 3  | 4  | 14  | 0.0  | 1.0 | 1.8 | 3.5  | 9.49E-01 | 5.00E-05 | 1.00E+00 | 2.85E-04 |
| Gm4956_chr1   | 1  | 5  | 1  | 10  | 2.2  | 4.7 | 3.3 | 9.7  | 1.45E-06 | 5.00E-05 | 6.10E-04 | 2.82E-04 |
| Gm5086_chr13  | 1  | 1  | 1  | 2   | 0.4  | 1.4 | 0.9 | 1.9  | 2.49E-01 | 4.50E-04 | 9.90E-01 | 2.10E-03 |
| Gm5088_chr14  | 0  | 0  | 0  | 2   | 0.0  | 1.0 | 0.9 | 1.9  | 7.50E-01 | 5.00E-05 | 1.00E+00 | 2.82E-04 |
| Gm5431_chr11  | 1  | 1  | 2  | 3   | 0.4  | 1.3 | 0.8 | 1.7  | 3.55E-01 | 2.50E-04 | 9.98E-01 | 1.25E-03 |
| Gm561_chr2    | 7  | 7  | 4  | 7   | 0.0  | 1.0 | 0.6 | 1.6  | 9.91E-01 | 4.65E-03 | 1.00E+00 | 1.63E-02 |
| Gm5643_chrX   | 1  | 1  | 1  | 2   | 0.0  | 1.0 | 0.6 | 1.5  | 6.20E-01 | 1.90E-03 | 1.00E+00 | 7.83E-03 |
| Gm6548_chr17  | 3  | 4  | 4  | 19  | 0.4  | 1.4 | 2.4 | 5.3  | 2.12E-01 | 5.00E-05 | 9.84E-01 | 2.82E-04 |
| Gm6682_chr12  | 1  | 1  | 3  | 4   | -0.2 | 1.1 | 0.6 | 1.5  | 7.24E-01 | 2.55E-03 | 1.00E+00 | 9.61E-03 |
| Gm7367_chr11  | 16 | 20 | 24 | 39  | 0.3  | 1.3 | 0.7 | 1.6  | 1.88E-01 | 5.00E-05 | 9.82E-01 | 2.82E-04 |
| Gm7609_chr1   | 9  | 11 | 12 | 23  | 0.3  | 1.2 | 0.9 | 1.8  | 2.76E-01 | 5.00E-05 | 9.94E-01 | 2.85E-04 |
| Gm7694_chr1   | 2  | 2  | 4  | 8   | 0.4  | 1.3 | 1.0 | 2.0  | 2.34E-01 | 5.00E-05 | 9.91E-01 | 2.85E-04 |
| Gm8369_chr19  | 4  | 7  | 3  | 6   | 0.8  | 1.7 | 0.9 | 1.8  | 2.22E-02 | 5.00E-05 | 5.44E-01 | 2.85E-04 |
| Gm9199_chr14  | 0  | 0  | 0  | 2   | 0.0  | 1.0 | 0.8 | 1.8  | 7.86E-02 | 5.00E-05 | 8.96E-01 | 2.82E-04 |
| Gm9320_chr17  | 5  | 5  | 3  | 8   | -0.1 | 1.1 | 1.5 | 2.9  | 8.42E-01 | 5.00E-05 | 1.00E+00 | 2.82E-04 |
| Gm9895_chr19  | 0  | 0  | 0  | 2   | 0.0  | 1.0 | 1.0 | 2.0  | 5.84E-01 | 5.00E-05 | 1.00E+00 | 2.82E-04 |
| Gm996_chr2    | 1  | 1  | 1  | 3   | 0.0  | 1.0 | 1.0 | 2.0  | 6.25E-01 | 5.00E-05 | 1.00E+00 | 2.85E-04 |

|                     |     |     |     |       |      |      |     |      |          |          |          |          |
|---------------------|-----|-----|-----|-------|------|------|-----|------|----------|----------|----------|----------|
| Gnaz_chr10          | 1   | 1   | 2   | 3     | 0.0  | 1.0  | 0.7 | 1.6  | 8.73E-01 | 5.00E-04 | 1.00E+00 | 2.32E-03 |
| Gng11_chr6          | 12  | 13  | 8   | 16    | 0.1  | 1.1  | 1.0 | 1.9  | 7.44E-01 | 5.00E-05 | 1.00E+00 | 2.85E-04 |
| Gp1ba_chr11         | 2   | 3   | 3   | 5     | 0.6  | 1.5  | 0.7 | 1.6  | 9.66E-02 | 1.00E-04 | 9.32E-01 | 5.44E-04 |
| Gp6_chr7            | 1   | 2   | 2   | 5     | 0.7  | 1.6  | 1.3 | 2.5  | 2.36E-01 | 5.00E-05 | 9.91E-01 | 2.85E-04 |
| Gpaa1_chr15         | 5   | 7   | 8   | 13    | 0.4  | 1.4  | 0.7 | 1.7  | 1.33E-01 | 5.00E-05 | 9.56E-01 | 2.85E-04 |
| Gpd1_chr15          | 1   | 2   | 2   | 4     | 0.3  | 1.2  | 0.8 | 1.8  | 5.23E-01 | 5.00E-05 | 1.00E+00 | 2.85E-04 |
| Gpr128_chr16        | 0   | 0   | 0   | 2     | 0.0  | 1.0  | 0.8 | 1.7  | 4.36E-01 | 5.00E-05 | 1.00E+00 | 2.85E-04 |
| Gpr146_chr5         | 8   | 8   | 0   | 11    | 0.0  | 1.0  | 3.5 | 11.4 | 9.71E-01 | 1.37E-02 | 1.00E+00 | 4.24E-02 |
| Gpr35_chr1          | 4   | 5   | 8   | 13    | 0.2  | 1.2  | 0.6 | 1.5  | 4.65E-01 | 7.50E-05 | 1.00E+00 | 4.08E-04 |
| Gpr56_chr8          | 3   | 6   | 8   | 13    | 0.9  | 1.9  | 0.7 | 1.6  | 1.52E-03 | 7.50E-05 | 1.62E-01 | 4.21E-04 |
| Gpr82_chrX          | 1   | 1   | 1   | 3     | 0.3  | 1.2  | 1.6 | 3.0  | 7.00E-01 | 5.05E-03 | 1.00E+00 | 1.75E-02 |
| Gpr88_chr3          | 1   | 2   | 2   | 3     | 1.0  | 2.0  | 1.0 | 2.0  | 1.99E-03 | 5.00E-05 | 1.95E-01 | 2.85E-04 |
| Gsg2_chr11          | 2   | 2   | 3   | 11    | 0.1  | 1.1  | 1.7 | 3.2  | 8.47E-01 | 5.00E-05 | 1.00E+00 | 2.85E-04 |
| Gtf2a2_chr9         | 19  | 21  | 13  | 21    | 0.2  | 1.1  | 0.7 | 1.6  | 5.17E-01 | 5.00E-05 | 1.00E+00 | 2.85E-04 |
| Gtf2b_chr3          | 19  | 20  | 23  | 38    | 0.1  | 1.0  | 0.7 | 1.7  | 7.90E-01 | 5.00E-05 | 1.00E+00 | 2.85E-04 |
| Gucd1_chr10         | 19  | 20  | 33  | 50    | 0.1  | 1.1  | 0.6 | 1.5  | 6.65E-01 | 5.00E-05 | 1.00E+00 | 2.85E-04 |
| Gvin1_chr7          | 2   | 2   | 1   | 9     | -0.2 | 1.2  | 2.8 | 6.8  | 1.00E+00 | 5.00E-05 | 1.00E+00 | 2.92E-04 |
| Gzma_chr13          | 11  | 22  | 10  | 39    | 0.9  | 1.9  | 2.0 | 3.9  | 1.01E-03 | 5.00E-05 | 8.70E-02 | 2.85E-04 |
| H2-Q2_chr17         | 0   | 1   | 0   | 2     | 0.0  | 1.0  | 0.6 | 1.5  | 1.29E-01 | 5.00E-05 | 9.54E-01 | 2.85E-04 |
| H2-Q4_chr17         | 102 | 122 | 134 | 213   | 0.3  | 1.2  | 0.7 | 1.6  | 2.50E-01 | 1.00E-04 | 9.92E-01 | 5.44E-04 |
| H2-Q6_chr17         | 57  | 96  | 97  | 225   | 0.8  | 1.7  | 1.2 | 2.3  | 3.78E-04 | 5.00E-05 | 6.30E-02 | 2.85E-04 |
| H2-Q7_chr17         | 21  | 28  | 19  | 55    | 0.5  | 1.5  | 1.8 | 3.6  | 3.30E-01 | 2.14E-02 | 9.83E-01 | 5.61E-02 |
| H2-Q8_chr17         | 60  | 77  | 96  | 204   | 0.4  | 1.3  | 1.1 | 2.1  | 8.97E-02 | 5.00E-05 | 8.35E-01 | 2.85E-04 |
| H2-Q9_chr17         | 29  | 41  | 36  | 103   | 0.5  | 1.4  | 1.5 | 2.9  | 1.46E-01 | 5.00E-05 | 9.39E-01 | 2.49E-04 |
| H2-T24_chr17        | 21  | 23  | 32  | 55    | 0.1  | 1.1  | 0.8 | 1.7  | 8.71E-01 | 1.38E-02 | 1.00E+00 | 4.10E-02 |
| H3f3a_chr1          | 407 | 420 | 376 | 606   | 0.0  | 1.0  | 0.7 | 1.6  | 8.58E-01 | 1.50E-04 | 1.00E+00 | 7.89E-04 |
| Hace1_chr10         | 5   | 5   | 8   | 20    | -0.1 | 1.1  | 1.4 | 2.7  | 7.03E-01 | 5.00E-05 | 1.00E+00 | 2.85E-04 |
| Hars_chr18          | 18  | 22  | 24  | 47    | 0.3  | 1.3  | 1.0 | 2.0  | 1.34E-01 | 5.00E-05 | 9.56E-01 | 2.85E-04 |
| Hat1_chr2           | 15  | 18  | 17  | 53    | 0.3  | 1.2  | 1.6 | 3.1  | 2.81E-01 | 5.00E-05 | 9.94E-01 | 2.85E-04 |
| Haus1_chr18         | 4   | 6   | 5   | 9     | 0.6  | 1.5  | 0.7 | 1.6  | 1.25E-01 | 2.50E-04 | 9.50E-01 | 1.25E-03 |
| Haus4_chr14         | 4   | 5   | 7   | 13    | 0.3  | 1.2  | 1.0 | 2.0  | 4.18E-01 | 5.00E-05 | 1.00E+00 | 2.85E-04 |
| Haus8_chr8          | 6   | 9   | 6   | 14    | 0.6  | 1.5  | 1.1 | 2.2  | 4.69E-02 | 2.21E-02 | 8.21E-01 | 5.32E-02 |
| Hbb-b1_chr7         | 37  | 434 | 37  | 1,011 | 3.6  | 11.8 | 6.2 | 76.0 | 1.78E-15 | 5.00E-05 | 2.59E-12 | 2.85E-04 |
| Hbb-b2_chr7         | 37  | 434 | 104 | 1,051 | 3.6  | 11.8 | 3.9 | 14.7 | 1.78E-15 | 5.00E-05 | 2.59E-12 | 2.77E-04 |
| Hbq1a_chr11         | 1   | 1   | 0   | 2     | 0.0  | 1.0  | 0.8 | 1.8  | 9.82E-01 | 5.00E-05 | 1.00E+00 | 2.85E-04 |
| Hcar2_chr5          | 2   | 3   | 4   | 9     | 0.3  | 1.2  | 1.3 | 2.5  | 4.39E-01 | 5.00E-05 | 1.00E+00 | 2.85E-04 |
| Hdgp_chr3           | 30  | 43  | 50  | 100   | 0.5  | 1.4  | 1.0 | 2.0  | 1.46E-02 | 5.00E-05 | 5.46E-01 | 2.85E-04 |
| Heatr5a_chr12       | 6   | 6   | 12  | 21    | 0.2  | 1.1  | 0.7 | 1.7  | 4.00E-01 | 5.00E-05 | 1.00E+00 | 2.85E-04 |
| Hebp1_chr6          | 26  | 43  | 28  | 99    | 0.7  | 1.6  | 1.8 | 3.6  | 1.80E-03 | 5.00E-05 | 1.33E-01 | 2.85E-04 |
| Hells_chr19         | 6   | 6   | 9   | 21    | 0.0  | 1.0  | 1.2 | 2.3  | 9.45E-01 | 5.00E-05 | 1.00E+00 | 2.85E-04 |
| Herc6_chr6          | 9   | 8   | 12  | 25    | -0.2 | 1.1  | 1.0 | 2.1  | 4.33E-01 | 5.00E-05 | 1.00E+00 | 2.85E-04 |
| Hexim2_chr11        | 0   | 1   | 1   | 2     | 0.0  | 1.0  | 1.0 | 2.0  | 6.59E-01 | 5.00E-05 | 1.00E+00 | 2.70E-04 |
| Hiat11_chr13        | 16  | 17  | 25  | 37    | 0.1  | 1.0  | 0.6 | 1.5  | 7.97E-01 | 3.25E-02 | 1.00E+00 | 6.74E-02 |
| Hint1_chr11         | 54  | 59  | 43  | 75    | 0.1  | 1.1  | 0.8 | 1.7  | 5.85E-01 | 5.00E-05 | 1.00E+00 | 2.85E-04 |
| Hipk2_chr6          | 2   | 2   | 7   | 13    | -0.3 | 1.2  | 0.9 | 1.9  | 5.77E-01 | 1.49E-03 | 1.00E+00 | 5.69E-03 |
| Hirip3_chr7         | 6   | 7   | 7   | 16    | 0.2  | 1.2  | 1.2 | 2.2  | 4.55E-01 | 5.00E-05 | 1.00E+00 | 2.85E-04 |
| Hist1h1c_chr13      | 8   | 11  | 11  | 19    | 0.5  | 1.4  | 0.8 | 1.8  | 1.02E-01 | 5.00E-05 | 9.38E-01 | 2.85E-04 |
| Hist1h2bg_chr13     | 0   | 1   | 1   | 2     | 0.0  | 1.0  | 0.6 | 1.5  | 3.87E-01 | 1.75E-03 | 1.00E+00 | 6.97E-03 |
| Hist1h4i_chr13      | 3   | 3   | 3   | 4     | -0.1 | 1.1  | 0.6 | 1.6  | 8.31E-01 | 1.28E-02 | 1.00E+00 | 3.84E-02 |
| Hjurp_chr1          | 2   | 3   | 4   | 15    | 0.7  | 1.6  | 2.0 | 4.0  | 8.29E-02 | 5.00E-05 | 9.16E-01 | 2.85E-04 |
| Hk1_chr10           | 11  | 17  | 15  | 34    | 0.6  | 1.5  | 1.3 | 2.4  | 7.91E-03 | 1.52E-02 | 4.29E-01 | 3.98E-02 |
| Hmbs_chr9           | 7   | 7   | 5   | 160   | 0.0  | 1.0  | 5.6 | 48.2 | 6.61E-01 | 5.00E-05 | 9.96E-01 | 2.85E-04 |
| Hmgcl_chr4          | 14  | 17  | 18  | 27    | 0.3  | 1.2  | 0.6 | 1.5  | 2.18E-01 | 1.00E-04 | 9.89E-01 | 5.44E-04 |
| Hmgn5_chrX          | 11  | 13  | 9   | 19    | 0.2  | 1.2  | 1.1 | 2.1  | 3.62E-01 | 5.00E-05 | 9.99E-01 | 2.85E-04 |
| Hmox1_chr8          | 75  | 159 | 116 | 263   | 1.1  | 2.1  | 1.2 | 2.3  | 9.27E-07 | 5.00E-05 | 2.48E-04 | 2.85E-04 |
| Hook2_chr8          | 1   | 2   | 2   | 3     | 0.7  | 1.6  | 0.8 | 1.7  | 1.70E-01 | 2.38E-03 | 9.60E-01 | 8.97E-03 |
| Hras_chr7           | 3   | 4   | 4   | 7     | 0.2  | 1.1  | 0.9 | 1.9  | 7.01E-01 | 3.90E-04 | 1.00E+00 | 1.94E-03 |
| Hs6st1_chr1         | 11  | 15  | 27  | 56    | 0.4  | 1.3  | 1.1 | 2.1  | 5.89E-02 | 5.00E-05 | 8.70E-01 | 2.85E-04 |
| Hscb_chr5           | 7   | 9   | 8   | 13    | 0.3  | 1.3  | 0.6 | 1.5  | 3.38E-01 | 9.00E-04 | 9.98E-01 | 3.91E-03 |
| Hsp90aa1_chr12      | 114 | 126 | 170 | 351   | 0.1  | 1.1  | 1.0 | 2.1  | 5.57E-01 | 5.00E-05 | 1.00E+00 | 2.85E-04 |
| Hspa4l_chr3         | 5   | 5   | 9   | 17    | 0.0  | 1.0  | 0.9 | 1.9  | 8.86E-01 | 5.00E-05 | 1.00E+00 | 2.85E-04 |
| Hspb6_chr7          | 1   | 1   | 2   | 4     | 0.1  | 1.1  | 1.4 | 2.6  | 8.15E-01 | 5.00E-05 | 1.00E+00 | 2.85E-04 |
| Hspbap1_chr16       | 2   | 2   | 2   | 4     | 0.1  | 1.1  | 0.6 | 1.5  | 7.06E-01 | 2.00E-04 | 1.00E+00 | 1.02E-03 |
| Htatip2_chr7        | 3   | 4   | 2   | 5     | 0.2  | 1.2  | 1.7 | 3.2  | 7.48E-01 | 1.20E-02 | 1.00E+00 | 3.60E-02 |
| Htra2_chr6          | 17  | 18  | 20  | 32    | 0.2  | 1.1  | 0.7 | 1.6  | 5.40E-01 | 5.00E-05 | 1.00E+00 | 2.85E-04 |
| I830012O16Rik_chr19 | 2   | 2   | 2   | 7     | 0.0  | 1.0  | 1.8 | 3.5  | 9.16E-01 | 5.00E-05 | 1.00E+00 | 2.85E-04 |
| Ibtk_chr9           | 11  | 13  | 21  | 37    | 0.2  | 1.2  | 0.8 | 1.8  | 2.71E-01 | 5.00E-05 | 9.94E-01 | 2.85E-04 |
| Ifi27_chr12         | 14  | 21  | 11  | 34    | 0.6  | 1.5  | 1.8 | 3.4  | 1.18E-01 | 5.00E-05 | 9.32E-01 | 2.85E-04 |
| Ifi27l2a_chr12      | 52  | 62  | 29  | 130   | 0.3  | 1.2  | 2.2 | 4.5  | 2.87E-01 | 5.00E-05 | 9.95E-01 | 2.85E-04 |
| Ifi35_chr11         | 15  | 19  | 16  | 31    | 0.3  | 1.2  | 1.0 | 1.9  | 2.13E-01 | 5.00E-05 | 9.88E-01 | 2.85E-04 |
| Ifi47_chr11         | 30  | 35  | 38  | 84    | 0.2  | 1.1  | 1.2 | 2.2  | 4.34E-01 | 5.00E-05 | 1.00E+00 | 2.85E-04 |
| Ifih1_chr2          | 3   | 4   | 6   | 17    | 0.2  | 1.1  | 1.4 | 2.6  | 4.94E-01 | 5.00E-05 | 1.00E+00 | 2.85E-04 |
| Ifit1_chr19         | 2   | 2   | 3   | 13    | 0.4  | 1.3  | 2.4 | 5.3  | 3.51E-01 | 5.00E-05 | 9.98E-01 | 2.85E-04 |
| Ifit2_chr19         | 5   | 5   | 7   | 16    | 0.2  | 1.1  | 1.2 | 2.3  | 4.78E-01 | 5.00E-05 | 1.00E+00 | 2.85E-04 |
| Ifit3_chr19         | 3   | 5   | 4   | 24    | 0.5  | 1.4  | 2.6 | 6.2  | 1.25E-01 | 5.00E-05 | 9.50E-01 | 2.85E-04 |
| Ifnlr1_chr4         | 1   | 1   | 1   | 2     | 0.0  | 1.0  | 0.9 | 1.9  | 8.05E-01 | 5.00E-05 | 1.00E+00 | 2.85E-04 |
| Igsf3_chr3          | 1   | 1   | 2   | 3     | 0.0  | 1.0  | 0.7 | 1.6  | 1.50E-01 | 5.00E-05 | 9.71E-01 | 2.85E-04 |
| Igtp_chr11          | 19  | 20  | 22  | 61    | 0.1  | 1.1  | 1.4 | 2.7  | 5.83E-01 | 5.00E-05 | 1.00E+00 | 2.85E-04 |
| Ilgp1_chr18         | 12  | 11  | 15  | 74    | -0.1 | 1.1  | 2.3 | 4.9  | 7.55E-01 | 5.00E-05 | 1.00E+00 | 2.85E-04 |
| Il12b_chr11         | 1   | 1   | 1   | 2     | 0.0  | 1.0  | 0.7 | 1.7  | 3.63E-01 | 6.00E-04 | 9.99E-01 | 2.73E-03 |
| Il12rb1_chr8        | 1   | 1   | 1   | 4     | 0.1  | 1.1  | 1.3 | 2.4  | 1.28E-01 | 5.00E-05 | 9.54E-01 | 2.85E-04 |



|                |    |     |    |     |      |     |     |      |          |          |          |          |
|----------------|----|-----|----|-----|------|-----|-----|------|----------|----------|----------|----------|
| Il13ra1_chrX   | 7  | 6   | 11 | 17  | -0.4 | 1.3 | 0.7 | 1.6  | 1.52E-01 | 5.00E-05 | 9.72E-01 | 2.85E-04 |
| Il15_chr8      | 2  | 2   | 2  | 4   | 0.3  | 1.2 | 1.2 | 2.3  | 6.61E-01 | 1.10E-04 | 1.00E+00 | 6.21E-04 |
| Il1a_chr2      | 3  | 3   | 4  | 7   | -0.1 | 1.1 | 0.8 | 1.8  | 8.26E-01 | 5.00E-05 | 1.00E+00 | 2.85E-04 |
| Immp1_chr2     | 13 | 13  | 10 | 17  | 0.0  | 1.0 | 0.7 | 1.7  | 9.29E-01 | 5.00E-05 | 1.00E+00 | 2.85E-04 |
| Immp2l_chr12   | 1  | 1   | 1  | 2   | 0.2  | 1.2 | 0.6 | 1.5  | 7.53E-01 | 3.00E-04 | 1.00E+00 | 1.47E-03 |
| Inhba_chr13    | 0  | 0   | 0  | 2   | 0.0  | 1.0 | 0.9 | 1.8  | 2.93E-01 | 5.00E-05 | 1.00E+00 | 2.85E-04 |
| Ints8_chr4     | 11 | 11  | 3  | 25  | 0.1  | 1.0 | 3.0 | 8.2  | 6.40E-01 | 5.00E-05 | 1.00E+00 | 3.24E-04 |
| Irf7_chr7      | 7  | 10  | 8  | 45  | 0.4  | 1.4 | 2.5 | 5.8  | 2.41E-01 | 5.00E-05 | 9.66E-01 | 2.96E-04 |
| Irf9_chr14     | 10 | 12  | 5  | 21  | 0.4  | 1.3 | 2.2 | 4.5  | 3.71E-01 | 5.00E-05 | 9.75E-01 | 2.97E-04 |
| Irgc1_chr7     | 1  | 2   | 1  | 4   | 1.0  | 2.0 | 1.9 | 3.6  | 3.79E-04 | 5.00E-05 | 4.30E-02 | 2.85E-04 |
| Irgm1_chr11    | 21 | 25  | 28 | 62  | 0.3  | 1.2 | 1.2 | 2.2  | 2.34E-01 | 5.00E-05 | 9.91E-01 | 2.85E-04 |
| Irgm2_chr11    | 14 | 17  | 23 | 43  | 0.3  | 1.2 | 0.9 | 1.9  | 1.72E-01 | 5.00E-05 | 9.82E-01 | 2.85E-04 |
| Isca2_chr12    | 9  | 10  | 7  | 13  | 0.1  | 1.1 | 0.9 | 1.9  | 6.58E-01 | 5.00E-05 | 1.00E+00 | 2.85E-04 |
| Itga5_chr15    | 2  | 3   | 5  | 9   | 0.1  | 1.1 | 0.7 | 1.7  | 7.04E-01 | 5.00E-05 | 1.00E+00 | 2.85E-04 |
| Itgae_chr11    | 1  | 2   | 2  | 4   | 0.1  | 1.1 | 0.9 | 1.9  | 8.62E-01 | 2.00E-02 | 1.00E+00 | 5.29E-02 |
| Itpa_chr2      | 12 | 11  | 12 | 24  | -0.1 | 1.1 | 1.0 | 1.9  | 7.08E-01 | 5.00E-05 | 1.00E+00 | 2.85E-04 |
| Itn1_chr16     | 6  | 7   | 10 | 19  | 0.2  | 1.1 | 1.1 | 2.2  | 5.08E-01 | 8.50E-04 | 1.00E+00 | 3.55E-03 |
| Josd2_chr7     | 4  | 5   | 5  | 16  | 0.3  | 1.2 | 1.6 | 3.1  | 5.93E-01 | 5.00E-05 | 1.00E+00 | 2.85E-04 |
| Katnal1_chr5   | 2  | 2   | 3  | 6   | 0.1  | 1.0 | 1.1 | 2.2  | 8.74E-01 | 5.00E-05 | 1.00E+00 | 2.85E-04 |
| Kbtbd12_chr6   | 0  | 0   | 1  | 2   | 0.0  | 1.0 | 0.6 | 1.6  | 8.93E-01 | 5.00E-05 | 1.00E+00 | 2.61E-04 |
| Kcnj5_chr9     | 1  | 1   | 1  | 2   | 0.0  | 1.0 | 1.0 | 1.9  | 4.80E-01 | 5.00E-05 | 1.00E+00 | 2.85E-04 |
| Kcnj9_chr1     | 1  | 1   | 1  | 2   | 0.0  | 1.0 | 0.9 | 1.8  | 3.03E-01 | 5.00E-05 | 9.96E-01 | 2.85E-04 |
| Kctd14_chr7    | 2  | 2   | 1  | 3   | 0.3  | 1.3 | 1.1 | 2.1  | 5.05E-01 | 1.81E-03 | 9.83E-01 | 6.66E-03 |
| Kctd7_chr5     | 2  | 2   | 3  | 6   | 0.3  | 1.2 | 1.0 | 2.0  | 4.19E-01 | 5.00E-05 | 1.00E+00 | 2.85E-04 |
| Khsrp_chr17    | 19 | 30  | 37 | 61  | 0.7  | 1.6 | 0.7 | 1.7  | 9.06E-04 | 5.00E-05 | 1.16E-01 | 2.85E-04 |
| Kif1a_chr1     | 0  | 0   | 1  | 2   | 0.0  | 1.0 | 0.7 | 1.7  | 7.31E-02 | 5.00E-05 | 8.94E-01 | 2.85E-04 |
| Kif20a_chr18   | 2  | 2   | 3  | 18  | 0.1  | 1.1 | 2.5 | 5.6  | 9.13E-01 | 8.50E-04 | 1.00E+00 | 3.74E-03 |
| Kif20b_chr19   | 4  | 4   | 7  | 18  | -0.2 | 1.1 | 1.3 | 2.5  | 4.41E-01 | 5.00E-05 | 1.00E+00 | 2.85E-04 |
| Klf11_chr12    | 3  | 3   | 6  | 10  | 0.3  | 1.2 | 0.8 | 1.8  | 3.93E-01 | 5.00E-05 | 1.00E+00 | 2.85E-04 |
| Klh12_chr1     | 4  | 5   | 7  | 17  | 0.4  | 1.3 | 1.3 | 2.5  | 1.75E-01 | 5.00E-05 | 9.84E-01 | 2.85E-04 |
| Klh123_chr2    | 2  | 2   | 3  | 8   | 0.2  | 1.1 | 1.5 | 2.9  | 6.29E-01 | 5.00E-05 | 1.00E+00 | 2.85E-04 |
| Klh125_chr7    | 4  | 4   | 8  | 13  | 0.0  | 1.0 | 0.7 | 1.6  | 5.36E-01 | 1.53E-02 | 1.00E+00 | 3.70E-02 |
| Klra17_chr6    | 5  | 8   | 4  | 9   | 0.7  | 1.6 | 1.1 | 2.1  | 4.37E-02 | 5.00E-05 | 7.01E-01 | 2.85E-04 |
| Klra7_chr6     | 1  | 2   | 1  | 4   | 0.6  | 1.6 | 1.6 | 3.1  | 4.64E-01 | 1.81E-03 | 9.96E-01 | 7.22E-03 |
| Klrb1f_chr6    | 2  | 2   | 2  | 4   | 0.2  | 1.1 | 1.1 | 2.2  | 7.92E-01 | 5.00E-05 | 1.00E+00 | 2.85E-04 |
| Klrc2_chr6     | 1  | 2   | 1  | 2   | 0.9  | 1.8 | 1.1 | 2.1  | 3.14E-01 | 1.27E-02 | 9.87E-01 | 3.80E-02 |
| Klrc3_chr6     | 2  | 2   | 3  | 6   | 0.1  | 1.1 | 1.1 | 2.2  | 8.82E-01 | 5.00E-05 | 1.00E+00 | 2.85E-04 |
| Klrd1_chr6     | 11 | 12  | 7  | 11  | 0.2  | 1.1 | 0.6 | 1.6  | 6.29E-01 | 6.00E-04 | 1.00E+00 | 2.73E-03 |
| Klrg1_chr6     | 1  | 1   | 1  | 2   | 0.0  | 1.0 | 0.7 | 1.7  | 8.28E-01 | 8.00E-04 | 1.00E+00 | 3.53E-03 |
| Lag3_chr6      | 2  | 4   | 5  | 11  | 0.7  | 1.6 | 1.2 | 2.3  | 6.65E-02 | 5.00E-05 | 8.76E-01 | 2.85E-04 |
| Lanc12_chr6    | 2  | 3   | 3  | 9   | 0.6  | 1.5 | 1.4 | 2.6  | 7.62E-02 | 5.00E-05 | 9.03E-01 | 2.85E-04 |
| Lap3_chr5      | 13 | 16  | 19 | 36  | 0.3  | 1.2 | 0.9 | 1.9  | 2.40E-01 | 5.00E-05 | 9.92E-01 | 2.85E-04 |
| Layn_chr9      | 1  | 1   | 1  | 2   | 0.0  | 1.0 | 0.7 | 1.7  | 7.18E-01 | 6.00E-04 | 1.00E+00 | 2.73E-03 |
| Lbr_chr1       | 38 | 47  | 67 | 121 | 0.3  | 1.3 | 0.9 | 1.8  | 1.21E-01 | 5.00E-05 | 9.50E-01 | 2.85E-04 |
| Lgals3bp_chr11 | 17 | 27  | 33 | 73  | 0.7  | 1.6 | 1.2 | 2.2  | 2.78E-03 | 5.00E-05 | 1.77E-01 | 2.85E-04 |
| Lhfp12_chr13   | 1  | 2   | 2  | 3   | 0.6  | 1.5 | 0.7 | 1.6  | 1.38E-01 | 5.00E-05 | 9.60E-01 | 2.85E-04 |
| Lilra5_chr7    | 1  | 3   | 1  | 8   | 1.8  | 3.5 | 2.8 | 7.0  | 1.46E-05 | 5.00E-05 | 3.70E-03 | 2.85E-04 |
| Lilra6_chr7    | 3  | 5   | 4  | 14  | 0.6  | 1.6 | 2.0 | 3.9  | 3.77E-01 | 6.50E-04 | 9.97E-01 | 2.94E-03 |
| Lipo1_chr19    | 1  | 2   | 2  | 8   | 0.8  | 1.7 | 2.2 | 4.7  | 4.78E-02 | 5.00E-05 | 7.23E-01 | 2.85E-04 |
| Lmo2_chr2      | 8  | 9   | 6  | 59  | -0.1 | 1.1 | 3.5 | 11.4 | 5.26E-01 | 5.00E-05 | 9.53E-01 | 2.97E-04 |
| Lmtk3_chr7     | 0  | 0   | 0  | 2   | 0.0  | 1.0 | 1.1 | 2.1  | 5.99E-01 | 5.00E-05 | 1.00E+00 | 2.85E-04 |
| Lpar2_chr8     | 1  | 3   | 1  | 4   | 1.5  | 2.8 | 1.7 | 3.2  | 6.62E-09 | 5.00E-05 | 6.37E-06 | 2.85E-04 |
| Lpcat3_chr6    | 8  | 10  | 13 | 28  | 0.3  | 1.2 | 1.2 | 2.2  | 4.23E-01 | 5.00E-05 | 1.00E+00 | 2.85E-04 |
| Lpin2_chr17    | 9  | 9   | 1  | 14  | 0.1  | 1.1 | 3.8 | 13.9 | 6.59E-01 | 5.00E-05 | 1.00E+00 | 2.97E-04 |
| Lrrc39_chr3    | 1  | 1   | 1  | 2   | 0.0  | 1.0 | 1.2 | 2.3  | 9.51E-01 | 5.55E-03 | 1.00E+00 | 1.76E-02 |
| Lsm2_chr17     | 3  | 6   | 2  | 5   | 0.7  | 1.6 | 1.0 | 2.0  | 1.86E-01 | 6.82E-03 | 9.90E-01 | 2.14E-02 |
| Lsm3_chr6      | 21 | 20  | 13 | 28  | 0.0  | 1.0 | 1.1 | 2.1  | 8.87E-01 | 5.00E-05 | 1.00E+00 | 2.85E-04 |
| Lsm4_chr8      | 15 | 23  | 18 | 29  | 0.6  | 1.5 | 0.7 | 1.6  | 2.55E-02 | 5.00E-05 | 6.92E-01 | 2.85E-04 |
| Lsm5_chr6      | 20 | 18  | 12 | 25  | -0.1 | 1.1 | 1.0 | 2.0  | 6.67E-01 | 5.00E-05 | 1.00E+00 | 2.85E-04 |
| Lsm7_chr10     | 18 | 21  | 13 | 20  | 0.2  | 1.1 | 0.6 | 1.5  | 6.05E-01 | 7.00E-04 | 1.00E+00 | 3.13E-03 |
| Lst1_chr17     | 20 | 22  | 10 | 18  | 0.1  | 1.1 | 0.9 | 1.9  | 7.85E-01 | 5.00E-05 | 1.00E+00 | 2.85E-04 |
| Lta4h_chr10    | 20 | 30  | 34 | 52  | 0.5  | 1.4 | 0.6 | 1.5  | 1.37E-02 | 5.00E-05 | 5.30E-01 | 2.85E-04 |
| Ly6a_chr15     | 70 | 134 | 55 | 158 | 0.9  | 1.9 | 1.5 | 2.9  | 1.00E-05 | 5.00E-05 | 2.86E-03 | 2.85E-04 |
| Ly6c1_chr15    | 22 | 30  | 2  | 8   | 0.4  | 1.3 | 1.9 | 3.7  | 3.71E-01 | 3.60E-03 | 9.16E-01 | 1.39E-02 |
| Ly6g6f_chr17   | 1  | 1   | 1  | 3   | 0.0  | 1.0 | 1.4 | 2.6  | 3.32E-01 | 5.00E-05 | 9.98E-01 | 2.85E-04 |
| Ly6k_chr15     | 3  | 10  | 2  | 10  | 1.9  | 3.7 | 2.3 | 5.0  | 7.87E-06 | 5.00E-05 | 2.37E-03 | 2.85E-04 |
| Lym4_chr13     | 2  | 3   | 2  | 5   | 0.4  | 1.3 | 1.1 | 2.1  | 3.14E-01 | 5.00E-05 | 9.97E-01 | 2.85E-04 |
| Mafg_chr11     | 7  | 7   | 13 | 26  | 0.0  | 1.0 | 1.0 | 2.0  | 9.63E-01 | 5.00E-05 | 1.00E+00 | 2.85E-04 |
| Magoh_chr4     | 34 | 37  | 27 | 55  | 0.1  | 1.1 | 1.0 | 2.1  | 5.92E-01 | 5.00E-05 | 1.00E+00 | 2.85E-04 |
| Magohb_chr6    | 4  | 4   | 2  | 4   | 0.3  | 1.2 | 0.9 | 1.9  | 5.79E-01 | 2.50E-04 | 1.00E+00 | 1.25E-03 |
| Manf_chr9      | 12 | 19  | 14 | 22  | 0.6  | 1.6 | 0.7 | 1.6  | 4.94E-03 | 5.00E-05 | 3.45E-01 | 2.85E-04 |
| Map2k3_chr11   | 11 | 15  | 21 | 45  | 0.5  | 1.4 | 1.1 | 2.1  | 3.21E-02 | 5.00E-05 | 7.62E-01 | 2.85E-04 |
| Map4k5_chr12   | 8  | 8   | 13 | 26  | 0.0  | 1.0 | 1.0 | 2.0  | 9.87E-01 | 5.00E-05 | 1.00E+00 | 2.85E-04 |
| March2_chr17   | 15 | 19  | 2  | 13  | 0.3  | 1.3 | 2.5 | 5.7  | 3.28E-01 | 5.00E-05 | 9.57E-01 | 3.08E-04 |
| March5_chr19   | 6  | 7   | 8  | 23  | 0.1  | 1.1 | 1.5 | 2.8  | 6.47E-01 | 5.00E-05 | 1.00E+00 | 3.08E-04 |
| Mb21d1_chr9    | 1  | 1   | 2  | 4   | 0.0  | 1.0 | 1.0 | 2.0  | 8.99E-01 | 5.00E-05 | 1.00E+00 | 2.85E-04 |
| Mbn13_chrX     | 3  | 4   | 6  | 10  | 0.1  | 1.0 | 0.6 | 1.5  | 8.28E-01 | 5.00E-05 | 1.00E+00 | 2.85E-04 |
| Mcm3_chr1      | 12 | 19  | 25 | 60  | 0.7  | 1.6 | 1.3 | 2.4  | 1.85E-03 | 5.00E-05 | 1.88E-01 | 2.85E-04 |
| Mcm4_chr16     | 13 | 18  | 23 | 52  | 0.5  | 1.4 | 1.2 | 2.3  | 2.39E-02 | 5.00E-05 | 6.72E-01 | 2.85E-04 |
| Mcm6_chr1      | 18 | 23  | 31 | 86  | 0.3  | 1.2 | 1.5 | 2.8  | 1.64E-01 | 5.00E-05 | 9.80E-01 | 2.85E-04 |
| Mcm8_chr2      | 1  | 1   | 2  | 3   | -0.2 | 1.1 | 1.0 | 2.0  | 6.01E-01 | 5.00E-05 | 1.00E+00 | 2.85E-04 |

|                |    |    |    |    |      |     |     |      |          |          |          |          |
|----------------|----|----|----|----|------|-----|-----|------|----------|----------|----------|----------|
| Med21_chr6     | 19 | 18 | 12 | 27 | 0.0  | 1.0 | 1.2 | 2.3  | 8.97E-01 | 5.00E-05 | 1.00E+00 | 2.85E-04 |
| Med29_chr7     | 3  | 3  | 3  | 5  | 0.2  | 1.2 | 0.6 | 1.5  | 5.47E-01 | 7.50E-04 | 1.00E+00 | 3.33E-03 |
| Med30_chr15    | 11 | 12 | 9  | 15 | 0.2  | 1.2 | 0.8 | 1.8  | 4.93E-01 | 5.00E-05 | 1.00E+00 | 2.85E-04 |
| Med6_chr12     | 10 | 11 | 10 | 17 | 0.2  | 1.2 | 0.8 | 1.7  | 4.79E-01 | 5.00E-05 | 1.00E+00 | 2.85E-04 |
| Med7_chr11     | 5  | 5  | 5  | 8  | 0.0  | 1.0 | 0.8 | 1.7  | 7.00E-01 | 1.51E-02 | 1.00E+00 | 3.91E-02 |
| Mefv_chr16     | 4  | 4  | 6  | 10 | 0.2  | 1.1 | 0.8 | 1.7  | 6.40E-01 | 3.75E-03 | 1.00E+00 | 1.26E-02 |
| Mesdc1_chr7    | 3  | 5  | 8  | 14 | 0.4  | 1.4 | 0.8 | 1.8  | 1.13E-01 | 5.00E-05 | 9.42E-01 | 2.85E-04 |
| Metap1d_chr2   | 3  | 7  | 3  | 12 | 1.4  | 2.6 | 2.0 | 3.9  | 3.17E-04 | 5.00E-05 | 3.81E-02 | 2.85E-04 |
| Metrn_chr17    | 3  | 2  | 3  | 5  | 0.0  | 1.0 | 0.7 | 1.6  | 9.78E-01 | 6.50E-04 | 1.00E+00 | 2.93E-03 |
| Metrn1_chr11   | 1  | 1  | 2  | 3  | 0.2  | 1.2 | 0.7 | 1.7  | 6.40E-01 | 1.00E-04 | 1.00E+00 | 5.44E-04 |
| Mett17a1_chr15 | 5  | 7  | 6  | 17 | 0.5  | 1.4 | 1.5 | 2.8  | 8.36E-02 | 5.00E-05 | 9.16E-01 | 2.85E-04 |
| Mett19_chr7    | 11 | 10 | 14 | 24 | -0.1 | 1.1 | 0.8 | 1.7  | 7.34E-01 | 6.90E-03 | 1.00E+00 | 2.28E-02 |
| Mfap3l_chr8    | 1  | 1  | 1  | 2  | 0.0  | 1.0 | 0.7 | 1.6  | 7.15E-01 | 1.50E-04 | 1.00E+00 | 7.49E-04 |
| Mff_chr1       | 16 | 19 | 19 | 31 | 0.2  | 1.1 | 0.7 | 1.7  | 4.07E-01 | 5.00E-05 | 1.00E+00 | 2.85E-04 |
| Mfsd12_chr10   | 3  | 4  | 10 | 15 | 0.1  | 1.1 | 0.6 | 1.6  | 7.71E-01 | 5.00E-05 | 1.00E+00 | 2.85E-04 |
| Mfsd7a_chr5    | 1  | 1  | 2  | 3  | -0.3 | 1.2 | 0.8 | 1.7  | 5.62E-01 | 5.00E-05 | 1.00E+00 | 2.85E-04 |
| Mgl1_chr6      | 6  | 5  | 7  | 15 | -0.3 | 1.2 | 1.1 | 2.2  | 3.06E-01 | 1.31E-02 | 9.99E-01 | 3.53E-02 |
| Mier3_chr13    | 7  | 7  | 11 | 21 | 0.2  | 1.1 | 0.9 | 1.8  | 4.87E-01 | 5.00E-05 | 1.00E+00 | 2.85E-04 |
| Mmp27_chr9     | 0  | 0  | 0  | 2  | 0.0  | 1.0 | 1.0 | 2.0  | 6.81E-01 | 5.00E-05 | 1.00E+00 | 2.85E-04 |
| Mmrn1_chr6     | 1  | 2  | 2  | 4  | 0.4  | 1.3 | 0.8 | 1.8  | 2.98E-01 | 1.28E-03 | 9.92E-01 | 5.04E-03 |
| Mnd1_chr3      | 1  | 1  | 0  | 3  | 0.0  | 1.0 | 1.7 | 3.3  | 8.63E-01 | 5.00E-05 | 1.00E+00 | 2.85E-04 |
| Mocs1_chr17    | 4  | 4  | 7  | 17 | -0.1 | 1.1 | 1.3 | 2.5  | 8.01E-01 | 1.33E-04 | 1.00E+00 | 7.20E-04 |
| Mospd1_chrX    | 5  | 5  | 7  | 13 | 0.0  | 1.0 | 1.0 | 2.0  | 9.20E-01 | 5.00E-05 | 1.00E+00 | 2.85E-04 |
| Mospd3_chr5    | 5  | 8  | 8  | 14 | 0.6  | 1.6 | 0.8 | 1.8  | 2.16E-01 | 6.77E-03 | 8.21E-01 | 1.98E-02 |
| Mpc1_chr17     | 20 | 21 | 16 | 28 | 0.0  | 1.0 | 0.8 | 1.7  | 8.74E-01 | 5.00E-05 | 1.00E+00 | 2.85E-04 |
| Mpc2_chr1      | 8  | 10 | 8  | 13 | 0.3  | 1.2 | 0.8 | 1.7  | 4.56E-01 | 5.00E-05 | 1.00E+00 | 2.85E-04 |
| Mpl_chr4       | 1  | 1  | 1  | 2  | 0.2  | 1.1 | 0.7 | 1.7  | 5.26E-01 | 1.45E-02 | 9.44E-01 | 3.92E-02 |
| Mpst_chr15     | 6  | 7  | 1  | 4  | 0.3  | 1.3 | 2.1 | 4.1  | 3.49E-01 | 1.85E-03 | 9.98E-01 | 7.66E-03 |
| Mri1_chr8      | 2  | 4  | 3  | 7  | 1.1  | 2.1 | 1.0 | 2.0  | 2.56E-03 | 5.00E-05 | 2.34E-01 | 2.85E-04 |
| Mrm1_chr11     | 5  | 7  | 8  | 19 | 0.3  | 1.2 | 1.2 | 2.3  | 2.73E-01 | 5.00E-05 | 9.94E-01 | 2.85E-04 |
| Mrpl1_chr5     | 3  | 3  | 3  | 4  | -0.2 | 1.2 | 0.7 | 1.6  | 7.12E-01 | 1.61E-02 | 1.00E+00 | 4.49E-02 |
| Mrpl12_chr11   | 17 | 18 | 18 | 30 | 0.1  | 1.1 | 0.7 | 1.6  | 6.34E-01 | 5.00E-05 | 1.00E+00 | 2.85E-04 |
| Mrpl18_chr17   | 15 | 16 | 16 | 25 | 0.2  | 1.1 | 0.7 | 1.6  | 5.72E-01 | 5.00E-05 | 1.00E+00 | 2.85E-04 |
| Mrpl20_chr4    | 21 | 18 | 14 | 27 | -0.2 | 1.2 | 1.0 | 2.0  | 4.84E-01 | 5.00E-05 | 1.00E+00 | 2.85E-04 |
| Mrpl22_chr11   | 7  | 8  | 6  | 10 | 0.1  | 1.1 | 0.7 | 1.6  | 7.08E-01 | 2.50E-04 | 1.00E+00 | 1.25E-03 |
| Mrpl27_chr11   | 10 | 10 | 9  | 15 | -0.1 | 1.1 | 0.7 | 1.7  | 7.99E-01 | 5.00E-05 | 1.00E+00 | 2.85E-04 |
| Mrpl30_chr1    | 18 | 17 | 12 | 19 | -0.1 | 1.0 | 0.7 | 1.6  | 8.60E-01 | 5.00E-05 | 1.00E+00 | 2.85E-04 |
| Mrpl33_chr5    | 29 | 30 | 16 | 31 | 0.1  | 1.0 | 1.0 | 2.0  | 8.25E-01 | 5.00E-05 | 1.00E+00 | 2.85E-04 |
| Mrpl40_chr16   | 10 | 10 | 8  | 13 | 0.1  | 1.0 | 0.7 | 1.6  | 8.60E-01 | 5.00E-05 | 1.00E+00 | 2.85E-04 |
| Mrpl41_chr2    | 4  | 4  | 4  | 7  | 0.0  | 1.0 | 0.8 | 1.7  | 9.67E-01 | 8.50E-04 | 1.00E+00 | 3.72E-03 |
| Mrpl42_chr10   | 14 | 15 | 13 | 20 | 0.2  | 1.1 | 0.6 | 1.5  | 5.98E-01 | 1.50E-04 | 1.00E+00 | 7.89E-04 |
| Mrpl47_chr3    | 7  | 6  | 6  | 10 | -0.1 | 1.1 | 0.6 | 1.6  | 7.50E-01 | 7.50E-04 | 1.00E+00 | 3.33E-03 |
| Mrpl51_chr6    | 8  | 10 | 7  | 12 | 0.3  | 1.2 | 0.7 | 1.7  | 3.02E-01 | 5.00E-05 | 9.96E-01 | 2.85E-04 |
| Mrpl53_chr6    | 7  | 8  | 7  | 13 | 0.1  | 1.1 | 0.9 | 1.9  | 8.84E-01 | 2.44E-02 | 1.00E+00 | 6.62E-02 |
| Mrpl54_chr10   | 9  | 9  | 6  | 11 | 0.1  | 1.1 | 0.7 | 1.6  | 8.36E-01 | 3.00E-04 | 1.00E+00 | 1.47E-03 |
| Mrpl57_chr14   | 3  | 3  | 3  | 5  | 0.4  | 1.3 | 0.7 | 1.6  | 2.89E-01 | 5.00E-05 | 9.95E-01 | 2.85E-04 |
| Mrps14_chr1    | 7  | 8  | 6  | 10 | 0.2  | 1.1 | 0.6 | 1.6  | 4.73E-01 | 1.50E-04 | 1.00E+00 | 7.89E-04 |
| Mrps18c_chr5   | 21 | 20 | 12 | 29 | 0.0  | 1.0 | 1.2 | 2.3  | 9.27E-01 | 5.00E-05 | 1.00E+00 | 2.85E-04 |
| Mrps22_chr9    | 6  | 6  | 6  | 11 | -0.1 | 1.1 | 0.9 | 1.9  | 8.20E-01 | 5.00E-05 | 1.00E+00 | 2.85E-04 |
| Mrps28_chr3    | 6  | 7  | 6  | 10 | 0.2  | 1.1 | 0.8 | 1.7  | 6.35E-01 | 5.00E-05 | 1.00E+00 | 2.85E-04 |
| Mrps36_chr13   | 5  | 7  | 6  | 10 | 0.5  | 1.4 | 0.7 | 1.7  | 3.87E-01 | 2.50E-04 | 9.98E-01 | 1.28E-03 |
| Ms4a4b_chr19   | 9  | 31 | 10 | 66 | 1.8  | 3.5 | 2.8 | 6.7  | 5.71E-11 | 5.00E-05 | 4.40E-08 | 2.85E-04 |
| Ms4a4c_chr19   | 26 | 36 | 27 | 41 | 0.5  | 1.4 | 0.6 | 1.5  | 3.60E-02 | 1.00E-04 | 7.71E-01 | 5.44E-04 |
| Mst1_chr9      | 0  | 0  | 1  | 2  | 0.0  | 1.0 | 0.9 | 1.8  | 6.34E-02 | 5.00E-05 | 1.00E+00 | 2.85E-04 |
| Mtcp1_chrX     | 5  | 6  | 6  | 10 | 0.2  | 1.1 | 0.8 | 1.7  | 7.53E-01 | 1.67E-02 | 1.00E+00 | 4.25E-02 |
| Mtfr1_chr3     | 7  | 8  | 11 | 36 | 0.3  | 1.2 | 1.8 | 3.4  | 2.75E-01 | 5.00E-05 | 9.94E-01 | 2.85E-04 |
| Mthfd1_chr12   | 9  | 12 | 20 | 32 | 0.5  | 1.4 | 0.7 | 1.7  | 4.50E-02 | 5.00E-05 | 8.28E-01 | 2.85E-04 |
| Mtx2_chr2      | 10 | 10 | 9  | 19 | 0.0  | 1.0 | 1.0 | 2.0  | 9.53E-01 | 5.00E-05 | 1.00E+00 | 2.85E-04 |
| Muc13_chr16    | 1  | 1  | 1  | 2  | 0.0  | 1.0 | 0.8 | 1.7  | 8.16E-01 | 2.00E-04 | 1.00E+00 | 1.02E-03 |
| Mx1_chr16      | 3  | 3  | 3  | 7  | 0.1  | 1.1 | 1.3 | 2.4  | 8.69E-01 | 6.00E-04 | 1.00E+00 | 2.56E-03 |
| Mx2_chr16      | 3  | 3  | 4  | 7  | 0.2  | 1.2 | 0.9 | 1.8  | 5.20E-01 | 5.00E-05 | 1.00E+00 | 2.82E-04 |
| Mxd3_chr13     | 1  | 1  | 1  | 13 | 0.0  | 1.0 | 3.5 | 11.4 | 9.70E-01 | 5.50E-04 | 1.00E+00 | 2.52E-03 |
| Mxi1_chr19     | 2  | 3  | 1  | 6  | 0.3  | 1.3 | 2.6 | 6.2  | 3.20E-01 | 5.00E-05 | 9.96E-01 | 2.97E-04 |
| Mybl1_chr1     | 1  | 1  | 1  | 2  | 0.0  | 1.0 | 0.7 | 1.7  | 3.85E-01 | 1.50E-04 | 1.00E+00 | 7.89E-04 |
| Myef2_chr2     | 8  | 8  | 8  | 13 | 0.0  | 1.0 | 0.7 | 1.6  | 7.90E-01 | 3.12E-02 | 1.00E+00 | 7.87E-02 |
| Mylpf_chr7     | 1  | 1  | 1  | 2  | 0.0  | 1.0 | 1.1 | 2.2  | 9.58E-01 | 2.00E-04 | 1.00E+00 | 1.02E-03 |
| Myo18b_chr5    | 0  | 0  | 1  | 2  | 0.0  | 1.0 | 1.0 | 2.0  | 2.98E-01 | 5.00E-05 | 9.96E-01 | 2.85E-04 |
| Myo19_chr11    | 2  | 2  | 3  | 5  | 0.0  | 1.0 | 0.7 | 1.7  | 9.67E-01 | 2.50E-03 | 1.00E+00 | 9.53E-03 |
| Myo1f_chr17    | 17 | 23 | 37 | 59 | 0.4  | 1.4 | 0.7 | 1.6  | 3.89E-02 | 5.00E-05 | 7.91E-01 | 2.85E-04 |
| Myof_chr19     | 5  | 8  | 11 | 19 | 0.6  | 1.5 | 0.8 | 1.7  | 1.01E-02 | 5.00E-05 | 3.65E-01 | 2.85E-04 |
| Mzt1_chr14     | 19 | 18 | 21 | 34 | -0.1 | 1.0 | 0.7 | 1.6  | 7.98E-01 | 5.00E-05 | 1.00E+00 | 2.85E-04 |
| Naa20_chr2     | 12 | 12 | 8  | 15 | 0.0  | 1.0 | 0.9 | 1.9  | 9.07E-01 | 4.39E-02 | 1.00E+00 | 8.99E-02 |
| Naa38_chr11    | 8  | 8  | 5  | 9  | 0.1  | 1.0 | 0.8 | 1.8  | 8.85E-01 | 1.10E-03 | 1.00E+00 | 4.65E-03 |
| Nadk2_chr15    | 6  | 7  | 9  | 31 | 0.1  | 1.1 | 1.8 | 3.4  | 6.59E-01 | 5.00E-05 | 1.00E+00 | 2.85E-04 |
| Naga_chr15     | 8  | 13 | 14 | 22 | 0.6  | 1.6 | 0.6 | 1.6  | 1.19E-02 | 5.00E-05 | 5.03E-01 | 2.85E-04 |
| Nampt_chr12    | 14 | 14 | 19 | 31 | 0.0  | 1.0 | 0.7 | 1.6  | 9.81E-01 | 5.00E-05 | 1.00E+00 | 2.85E-04 |
| Napa_chr7      | 13 | 18 | 22 | 36 | 0.4  | 1.4 | 0.7 | 1.6  | 5.19E-02 | 5.00E-05 | 8.48E-01 | 2.85E-04 |
| Narf_chr11     | 10 | 12 | 18 | 41 | 0.2  | 1.1 | 1.2 | 2.3  | 4.33E-01 | 5.00E-05 | 1.00E+00 | 2.85E-04 |
| Nasp_chr4      | 16 | 17 | 10 | 19 | 0.1  | 1.1 | 0.9 | 1.8  | 7.35E-01 | 2.14E-02 | 1.00E+00 | 5.30E-02 |
| Natd1_chr11    | 5  | 5  | 11 | 17 | 0.0  | 1.0 | 0.7 | 1.6  | 8.50E-01 | 5.00E-05 | 1.00E+00 | 2.85E-04 |
| Ncaph2_chr15   | 12 | 14 | 20 | 32 | 0.2  | 1.1 | 0.8 | 1.7  | 5.17E-01 | 3.00E-03 | 9.98E-01 | 1.09E-02 |

|                 |    |    |    |     |      |     |     |      |          |          |          |          |
|-----------------|----|----|----|-----|------|-----|-----|------|----------|----------|----------|----------|
| Ncoa4_chr14     | 32 | 39 | 40 | 125 | 0.4  | 1.3 | 1.6 | 3.1  | 2.69E-01 | 5.00E-05 | 9.72E-01 | 2.99E-04 |
| Ncr1_chr7       | 6  | 7  | 8  | 14  | 0.3  | 1.2 | 0.9 | 1.9  | 3.60E-01 | 5.00E-05 | 9.98E-01 | 2.85E-04 |
| Ndc1_chr4       | 2  | 2  | 5  | 8   | -0.1 | 1.0 | 0.8 | 1.7  | 8.69E-01 | 5.00E-05 | 1.00E+00 | 2.85E-04 |
| Nde1_chr16      | 12 | 14 | 2  | 9   | 0.2  | 1.2 | 1.9 | 3.7  | 4.43E-01 | 9.40E-03 | 9.92E-01 | 3.18E-02 |
| Ndufa1_chrX     | 27 | 28 | 12 | 20  | 0.1  | 1.0 | 0.7 | 1.7  | 8.15E-01 | 5.00E-05 | 1.00E+00 | 2.85E-04 |
| Ndufa2_chr18    | 33 | 34 | 22 | 35  | 0.1  | 1.1 | 0.7 | 1.6  | 7.85E-01 | 7.10E-03 | 1.00E+00 | 2.34E-02 |
| Ndufa4_chr6     | 75 | 75 | 50 | 115 | 0.0  | 1.0 | 1.2 | 2.3  | 9.70E-01 | 5.00E-05 | 1.00E+00 | 2.85E-04 |
| Ndufa5_chr6     | 15 | 19 | 13 | 26  | 0.3  | 1.3 | 1.0 | 2.1  | 2.82E-01 | 5.00E-05 | 9.94E-01 | 2.85E-04 |
| Ndufab1_chr7    | 7  | 9  | 5  | 9   | 0.4  | 1.3 | 0.8 | 1.8  | 2.77E-01 | 1.00E-04 | 9.94E-01 | 5.44E-04 |
| Ndufb2_chr6     | 9  | 9  | 6  | 13  | 0.0  | 1.0 | 1.1 | 2.1  | 9.64E-01 | 5.00E-05 | 1.00E+00 | 2.85E-04 |
| Ndufb3_chr1     | 36 | 45 | 23 | 35  | 0.3  | 1.3 | 0.6 | 1.6  | 1.98E-01 | 2.00E-04 | 9.87E-01 | 1.02E-03 |
| Ndufb4_chr16    | 22 | 21 | 15 | 26  | -0.1 | 1.1 | 0.8 | 1.7  | 7.76E-01 | 5.00E-05 | 1.00E+00 | 2.85E-04 |
| Ndufb6_chr4     | 12 | 14 | 9  | 14  | 0.2  | 1.2 | 0.7 | 1.7  | 5.35E-01 | 5.00E-05 | 1.00E+00 | 2.85E-04 |
| Ndufb8_chr19    | 23 | 26 | 20 | 32  | 0.2  | 1.1 | 0.7 | 1.6  | 5.47E-01 | 5.00E-05 | 1.00E+00 | 2.85E-04 |
| Ndufb9_chr15    | 26 | 29 | 20 | 41  | 0.2  | 1.1 | 1.0 | 2.1  | 5.44E-01 | 5.00E-05 | 1.00E+00 | 2.85E-04 |
| Ndufc2_chr7     | 22 | 22 | 17 | 36  | 0.0  | 1.0 | 1.1 | 2.2  | 9.55E-01 | 5.00E-05 | 1.00E+00 | 2.85E-04 |
| Ndufs4_chr13    | 16 | 15 | 9  | 18  | -0.1 | 1.1 | 1.0 | 1.9  | 7.23E-01 | 5.00E-05 | 1.00E+00 | 2.85E-04 |
| Ndufs6_chr13    | 16 | 19 | 10 | 16  | 0.2  | 1.2 | 0.8 | 1.7  | 4.84E-01 | 7.50E-05 | 1.00E+00 | 4.25E-04 |
| Ndufv2_chr17    | 20 | 20 | 15 | 23  | 0.0  | 1.0 | 0.6 | 1.5  | 9.78E-01 | 3.50E-04 | 1.00E+00 | 1.69E-03 |
| Nedd8_chr14     | 54 | 60 | 39 | 62  | 0.1  | 1.1 | 0.7 | 1.6  | 5.16E-01 | 5.00E-05 | 1.00E+00 | 2.85E-04 |
| Net1_chr13      | 9  | 10 | 2  | 5   | 0.1  | 1.1 | 1.6 | 3.0  | 7.39E-01 | 1.25E-03 | 1.00E+00 | 5.42E-03 |
| Neu3_chr7       | 2  | 2  | 4  | 10  | 0.1  | 1.1 | 1.2 | 2.4  | 7.70E-01 | 5.00E-05 | 1.00E+00 | 2.85E-04 |
| Neurl1a_chr19   | 0  | 0  | 1  | 2   | 0.0  | 1.0 | 0.7 | 1.6  | 1.01E-01 | 5.00E-05 | 9.20E-01 | 2.49E-04 |
| Nhp2l1_chr15    | 38 | 45 | 34 | 53  | 0.2  | 1.2 | 0.6 | 1.5  | 2.91E-01 | 1.00E-04 | 9.96E-01 | 5.44E-04 |
| Nkg7_chr7       | 10 | 15 | 11 | 18  | 0.6  | 1.5 | 0.7 | 1.6  | 5.15E-02 | 1.00E-04 | 8.48E-01 | 5.44E-04 |
| Nlrc5_chr8      | 14 | 14 | 28 | 60  | 0.0  | 1.0 | 1.1 | 2.1  | 9.52E-01 | 5.00E-05 | 1.00E+00 | 2.85E-04 |
| Nlrp1a_chr11    | 1  | 1  | 1  | 2   | 0.0  | 1.0 | 0.9 | 1.9  | 5.66E-01 | 5.00E-05 | 1.00E+00 | 2.85E-04 |
| Nlrp1b_chr11    | 2  | 2  | 3  | 4   | 0.0  | 1.0 | 0.7 | 1.6  | 9.65E-01 | 9.87E-03 | 1.00E+00 | 3.11E-02 |
| Nlrp1c-ps_chr11 | 1  | 1  | 2  | 3   | 0.0  | 1.0 | 0.6 | 1.5  | 4.99E-01 | 7.00E-04 | 1.00E+00 | 3.10E-03 |
| Nlrp3_chr11     | 2  | 3  | 5  | 9   | 0.3  | 1.2 | 0.9 | 1.9  | 3.04E-01 | 5.00E-05 | 9.96E-01 | 2.85E-04 |
| Nme1_chr11      | 23 | 27 | 19 | 35  | 0.2  | 1.2 | 0.9 | 1.8  | 3.20E-01 | 5.00E-05 | 9.97E-01 | 2.85E-04 |
| Nmi_chr2        | 11 | 14 | 10 | 18  | 0.4  | 1.3 | 0.8 | 1.8  | 3.90E-01 | 4.37E-03 | 9.97E-01 | 1.35E-02 |
| Nmnat1_chr4     | 2  | 3  | 2  | 4   | 0.8  | 1.8 | 0.7 | 1.6  | 9.49E-02 | 1.50E-03 | 9.27E-01 | 6.08E-03 |
| Nmral1_chr16    | 3  | 5  | 3  | 14  | 0.9  | 1.9 | 2.0 | 4.1  | 2.67E-02 | 5.00E-05 | 6.98E-01 | 2.85E-04 |
| Nop58_chr1      | 31 | 32 | 31 | 47  | 0.0  | 1.0 | 0.6 | 1.5  | 8.43E-01 | 5.00E-05 | 1.00E+00 | 2.85E-04 |
| Nos1ap_chr1     | 1  | 1  | 2  | 4   | 0.0  | 1.0 | 0.9 | 1.9  | 6.38E-01 | 5.00E-05 | 1.00E+00 | 2.85E-04 |
| Npl_chr1        | 3  | 4  | 4  | 6   | 0.2  | 1.1 | 0.7 | 1.6  | 6.83E-01 | 5.00E-05 | 1.00E+00 | 2.85E-04 |
| Nrgn_chr9       | 3  | 7  | 4  | 8   | 1.1  | 2.2 | 0.9 | 1.8  | 2.18E-03 | 5.00E-05 | 2.07E-01 | 2.85E-04 |
| Nsmce4a_chr7    | 24 | 26 | 25 | 38  | 0.1  | 1.1 | 0.6 | 1.5  | 6.24E-01 | 5.00E-05 | 1.00E+00 | 2.85E-04 |
| Nt5c3_chr6      | 9  | 11 | 12 | 93  | 0.1  | 1.1 | 3.0 | 8.2  | 2.13E-01 | 5.00E-05 | 9.25E-01 | 2.85E-04 |
| Nt5dc2_chr14    | 2  | 2  | 3  | 8   | 0.1  | 1.0 | 1.4 | 2.7  | 9.53E-01 | 4.07E-02 | 1.00E+00 | 1.01E-01 |
| Nudcd1_chr15    | 3  | 3  | 5  | 8   | 0.0  | 1.0 | 0.7 | 1.6  | 8.65E-01 | 3.47E-02 | 1.00E+00 | 7.77E-02 |
| Nudcd2_chr11    | 9  | 9  | 9  | 20  | 0.0  | 1.0 | 1.2 | 2.3  | 9.37E-01 | 5.00E-05 | 1.00E+00 | 2.85E-04 |
| Nudt1_chr5      | 3  | 4  | 3  | 6   | 0.2  | 1.2 | 0.8 | 1.7  | 6.17E-01 | 1.50E-04 | 1.00E+00 | 7.89E-04 |
| Nudt19_chr7     | 6  | 7  | 7  | 14  | 0.1  | 1.1 | 0.9 | 1.9  | 6.88E-01 | 5.00E-05 | 1.00E+00 | 2.85E-04 |
| Nudt21_chr8     | 23 | 26 | 30 | 47  | 0.2  | 1.1 | 0.7 | 1.6  | 5.20E-01 | 5.00E-05 | 1.00E+00 | 2.85E-04 |
| Nudt5_chr2      | 9  | 9  | 12 | 22  | 0.0  | 1.0 | 0.9 | 1.8  | 8.99E-01 | 5.00E-05 | 1.00E+00 | 2.85E-04 |
| Nudt7_chr8      | 2  | 2  | 2  | 4   | 0.3  | 1.3 | 0.7 | 1.7  | 6.00E-01 | 8.25E-04 | 1.00E+00 | 3.67E-03 |
| Nudt9_chr5      | 8  | 11 | 11 | 19  | 0.5  | 1.4 | 0.7 | 1.7  | 8.69E-02 | 5.00E-05 | 9.21E-01 | 2.85E-04 |
| Nup35_chr2      | 5  | 4  | 5  | 8   | -0.3 | 1.2 | 0.7 | 1.6  | 3.64E-01 | 5.00E-05 | 9.99E-01 | 2.85E-04 |
| Nup37_chr10     | 5  | 4  | 5  | 8   | -0.1 | 1.1 | 0.7 | 1.6  | 8.28E-01 | 3.25E-04 | 1.00E+00 | 1.60E-03 |
| Nup43_chr10     | 4  | 5  | 5  | 8   | 0.1  | 1.1 | 0.9 | 1.9  | 7.92E-01 | 5.00E-05 | 1.00E+00 | 2.85E-04 |
| Nup85_chr11     | 12 | 15 | 20 | 33  | 0.4  | 1.3 | 0.7 | 1.7  | 1.36E-01 | 5.00E-05 | 9.60E-01 | 2.85E-04 |
| Nupr1_chr7      | 4  | 5  | 3  | 7   | 0.5  | 1.4 | 1.2 | 2.3  | 2.91E-01 | 5.00E-05 | 9.96E-01 | 2.85E-04 |
| Nusap1_chr2     | 4  | 5  | 6  | 59  | 0.3  | 1.2 | 3.3 | 10.1 | 3.05E-01 | 5.00E-05 | 9.98E-01 | 2.85E-04 |
| Nxpe4_chr9      | 1  | 3  | 1  | 13  | 1.7  | 3.2 | 3.4 | 10.7 | 7.55E-08 | 5.00E-05 | 4.40E-05 | 2.85E-04 |
| Nxt1_chr2       | 7  | 8  | 7  | 12  | 0.2  | 1.1 | 0.7 | 1.7  | 6.52E-01 | 5.00E-05 | 1.00E+00 | 2.85E-04 |
| Oas1a_chr5      | 1  | 4  | 2  | 14  | 1.4  | 2.7 | 2.6 | 6.1  | 5.23E-04 | 5.00E-05 | 8.17E-02 | 2.85E-04 |
| Oas2_chr5       | 1  | 3  | 2  | 29  | 1.1  | 2.1 | 3.9 | 15.2 | 1.90E-03 | 5.00E-05 | 1.35E-01 | 2.85E-04 |
| Oasl1_chr5      | 1  | 2  | 2  | 11  | 1.0  | 2.0 | 2.4 | 5.2  | 2.11E-02 | 5.00E-05 | 6.45E-01 | 2.85E-04 |
| Odf2_chr2       | 6  | 8  | 1  | 9   | 0.6  | 1.5 | 3.0 | 7.9  | 2.79E-01 | 5.70E-03 | 9.88E-01 | 2.09E-02 |
| Odf2l_chr3      | 3  | 3  | 3  | 5   | 0.0  | 1.0 | 0.7 | 1.7  | 9.57E-01 | 1.88E-04 | 1.00E+00 | 9.71E-04 |
| Oip5_chr2       | 1  | 1  | 1  | 9   | 0.0  | 1.0 | 3.2 | 9.3  | 9.49E-01 | 5.00E-05 | 1.00E+00 | 2.85E-04 |
| Olfr1033_chr2   | 0  | 1  | 0  | 2   | 0.0  | 1.0 | 1.0 | 2.0  | 2.40E-05 | 5.00E-05 | 3.98E-03 | 2.85E-04 |
| Olfr98_chr17    | 1  | 1  | 2  | 4   | -0.1 | 1.1 | 1.1 | 2.1  | 8.04E-01 | 5.00E-05 | 1.00E+00 | 2.85E-04 |
| Olr1_chr6       | 0  | 0  | 0  | 2   | 0.0  | 1.0 | 0.6 | 1.5  | 4.38E-01 | 5.00E-05 | 1.00E+00 | 2.85E-04 |
| Orc2_chr1       | 7  | 6  | 10 | 20  | -0.2 | 1.2 | 1.0 | 2.0  | 6.27E-01 | 5.64E-04 | 1.00E+00 | 2.48E-03 |
| Orc5_chr5       | 10 | 10 | 12 | 19  | 0.0  | 1.0 | 0.7 | 1.6  | 9.79E-01 | 5.00E-05 | 1.00E+00 | 2.85E-04 |
| Orc6_chr8       | 5  | 5  | 5  | 22  | 0.0  | 1.0 | 2.2 | 4.5  | 9.53E-01 | 5.00E-05 | 1.00E+00 | 2.85E-04 |
| Osgepl1_chr1    | 3  | 3  | 4  | 7   | -0.2 | 1.1 | 0.8 | 1.8  | 5.91E-01 | 5.00E-05 | 1.00E+00 | 2.85E-04 |
| Ost4_chr5       | 37 | 39 | 22 | 37  | 0.1  | 1.1 | 0.8 | 1.7  | 8.25E-01 | 2.78E-02 | 1.00E+00 | 6.61E-02 |
| Otud5_chrX      | 33 | 38 | 54 | 89  | 0.2  | 1.2 | 0.7 | 1.6  | 3.29E-01 | 5.00E-05 | 9.98E-01 | 2.85E-04 |
| Pabpc4_chr4     | 13 | 15 | 19 | 44  | 0.2  | 1.1 | 1.2 | 2.3  | 5.63E-01 | 5.00E-05 | 1.00E+00 | 2.90E-04 |
| Pacsin2_chr15   | 14 | 15 | 3  | 9   | 0.0  | 1.0 | 1.8 | 3.6  | 8.89E-01 | 4.33E-03 | 1.00E+00 | 1.61E-02 |
| Pafah2_chr4     | 1  | 1  | 2  | 3   | -0.1 | 1.0 | 0.7 | 1.6  | 8.89E-01 | 1.00E-04 | 1.00E+00 | 5.44E-04 |
| Palb2_chr7      | 2  | 2  | 4  | 7   | 0.1  | 1.1 | 0.8 | 1.7  | 8.12E-01 | 5.00E-05 | 1.00E+00 | 2.85E-04 |
| Paqr4_chr17     | 2  | 2  | 3  | 6   | 0.3  | 1.2 | 0.9 | 1.9  | 6.09E-01 | 7.50E-04 | 1.00E+00 | 3.33E-03 |
| Parp12_chr6     | 4  | 4  | 6  | 15  | 0.1  | 1.1 | 1.3 | 2.4  | 7.18E-01 | 5.00E-05 | 1.00E+00 | 2.85E-04 |
| Parp9_chr16     | 13 | 15 | 20 | 31  | 0.1  | 1.1 | 0.7 | 1.6  | 6.78E-01 | 8.75E-03 | 1.00E+00 | 2.79E-02 |
| Pcna_chr2       | 53 | 64 | 64 | 199 | 0.3  | 1.2 | 1.6 | 3.1  | 2.03E-01 | 5.00E-05 | 9.87E-01 | 2.85E-04 |
| Pcyox1l_chr18   | 2  | 2  | 3  | 4   | 0.4  | 1.3 | 0.6 | 1.5  | 3.15E-01 | 1.40E-03 | 9.97E-01 | 5.72E-03 |

|                |    |     |    |     |      |     |     |      |          |          |          |          |
|----------------|----|-----|----|-----|------|-----|-----|------|----------|----------|----------|----------|
| Pcd5_chr7      | 16 | 17  | 11 | 20  | 0.1  | 1.0 | 0.9 | 1.8  | 8.22E-01 | 5.00E-05 | 1.00E+00 | 2.85E-04 |
| Pdia2_chr17    | 0  | 0   | 0  | 6   | 0.0  | 1.0 | 2.6 | 5.9  | 5.31E-01 | 5.00E-05 | 1.00E+00 | 2.85E-04 |
| Pdik1_chr4     | 5  | 5   | 9  | 13  | 0.0  | 1.0 | 0.6 | 1.5  | 9.61E-01 | 5.00E-05 | 1.00E+00 | 2.85E-04 |
| Pdk1_chr2      | 5  | 9   | 8  | 18  | 0.9  | 1.9 | 1.2 | 2.2  | 6.32E-05 | 5.00E-05 | 9.10E-03 | 2.85E-04 |
| Pdk3_chrX      | 6  | 7   | 9  | 14  | 0.3  | 1.2 | 0.7 | 1.6  | 3.16E-01 | 5.00E-05 | 9.97E-01 | 2.85E-04 |
| Pdzd11_chrX    | 7  | 8   | 7  | 12  | 0.2  | 1.1 | 0.8 | 1.8  | 5.61E-01 | 5.00E-05 | 1.00E+00 | 2.85E-04 |
| Pet100_chr8    | 4  | 4   | 2  | 5   | 0.0  | 1.0 | 1.0 | 2.1  | 9.99E-01 | 5.00E-05 | 1.00E+00 | 2.85E-04 |
| Pfdn1_chr18    | 11 | 12  | 8  | 12  | 0.1  | 1.1 | 0.6 | 1.5  | 7.28E-01 | 3.00E-04 | 1.00E+00 | 1.47E-03 |
| Pfdn4_chr2     | 7  | 8   | 5  | 12  | 0.1  | 1.0 | 1.1 | 2.1  | 8.86E-01 | 5.00E-05 | 1.00E+00 | 2.85E-04 |
| Pfkb1_chrX     | 1  | 1   | 1  | 2   | 0.0  | 1.0 | 0.6 | 1.5  | 9.77E-01 | 6.00E-03 | 1.00E+00 | 2.03E-02 |
| Pfkm_chr15     | 3  | 3   | 0  | 10  | 0.1  | 1.1 | 3.3 | 10.0 | 8.21E-01 | 2.31E-02 | 1.00E+00 | 6.57E-02 |
| Pgap2_chr7     | 6  | 7   | 10 | 15  | 0.3  | 1.2 | 0.6 | 1.5  | 4.64E-01 | 2.00E-04 | 1.00E+00 | 1.02E-03 |
| Pgp_chr17      | 5  | 6   | 10 | 20  | 0.3  | 1.2 | 1.0 | 2.0  | 4.60E-01 | 5.00E-05 | 1.00E+00 | 2.85E-04 |
| Phf10_chr17    | 13 | 14  | 19 | 42  | 0.0  | 1.0 | 1.1 | 2.1  | 8.97E-01 | 5.00E-05 | 1.00E+00 | 2.85E-04 |
| Phf11a_chr14   | 3  | 3   | 3  | 6   | -0.1 | 1.1 | 1.0 | 2.0  | 8.58E-01 | 5.00E-05 | 1.00E+00 | 2.85E-04 |
| Phf11d_chr14   | 2  | 2   | 2  | 4   | -0.1 | 1.1 | 1.0 | 1.9  | 8.24E-01 | 5.00E-05 | 1.00E+00 | 2.85E-04 |
| Phf5a_chr15    | 9  | 12  | 8  | 16  | 0.4  | 1.3 | 0.9 | 1.9  | 1.04E-01 | 5.00E-05 | 9.38E-01 | 2.85E-04 |
| Pidd1_chr7     | 2  | 3   | 4  | 12  | 0.2  | 1.2 | 1.6 | 3.0  | 4.89E-01 | 5.00E-05 | 1.00E+00 | 2.85E-04 |
| Piga_chrX      | 4  | 4   | 5  | 15  | 0.1  | 1.1 | 1.5 | 2.8  | 7.91E-01 | 5.00E-05 | 1.00E+00 | 2.85E-04 |
| Pigyl_chr6     | 1  | 2   | 1  | 2   | 0.4  | 1.3 | 0.7 | 1.6  | 2.10E-01 | 5.00E-05 | 9.88E-01 | 2.85E-04 |
| Pik3r1_chr13   | 9  | 10  | 1  | 13  | 0.5  | 1.4 | 3.7 | 12.7 | 5.38E-01 | 1.48E-02 | 1.00E+00 | 4.49E-02 |
| Pim1_chr17     | 18 | 27  | 32 | 76  | 0.6  | 1.5 | 1.2 | 2.3  | 8.49E-03 | 5.00E-05 | 4.41E-01 | 2.85E-04 |
| Pin4_chrX      | 17 | 20  | 7  | 12  | 0.3  | 1.2 | 0.7 | 1.6  | 3.90E-01 | 2.50E-04 | 1.00E+00 | 1.25E-03 |
| Pira1_chr7     | 0  | 1   | 0  | 3   | 0.3  | 1.2 | 1.6 | 3.0  | 3.17E-01 | 4.36E-02 | 9.97E-01 | 1.07E-01 |
| Pira4_chr7     | 1  | 2   | 1  | 8   | 0.7  | 1.6 | 2.9 | 7.7  | 5.53E-01 | 7.15E-03 | 1.00E+00 | 2.41E-02 |
| Pira6_chr7     | 1  | 2   | 2  | 11  | 0.5  | 1.4 | 2.5 | 5.5  | 2.89E-01 | 5.00E-05 | 8.64E-01 | 2.90E-04 |
| Pira7_chr7     | 1  | 3   | 1  | 8   | 1.1  | 2.1 | 2.9 | 7.7  | 3.52E-01 | 7.38E-03 | 9.98E-01 | 2.41E-02 |
| Pithd1_chr4    | 9  | 11  | 14 | 22  | 0.3  | 1.2 | 0.6 | 1.5  | 3.15E-01 | 1.50E-04 | 9.97E-01 | 7.89E-04 |
| Pitrm1_chr13   | 10 | 11  | 18 | 29  | 0.2  | 1.2 | 0.7 | 1.6  | 4.30E-01 | 5.20E-03 | 1.00E+00 | 1.79E-02 |
| Pkmyt1_chr17   | 4  | 6   | 7  | 13  | 0.5  | 1.4 | 0.8 | 1.8  | 1.52E-01 | 5.00E-05 | 9.72E-01 | 2.85E-04 |
| Pkn2_chr3      | 12 | 12  | 20 | 32  | 0.0  | 1.0 | 0.7 | 1.6  | 9.13E-01 | 1.00E-04 | 1.00E+00 | 5.44E-04 |
| Pla2g12a_chr3  | 3  | 3   | 2  | 5   | 0.0  | 1.0 | 1.1 | 2.2  | 9.59E-01 | 2.74E-02 | 1.00E+00 | 6.71E-02 |
| Pla2g16_chr19  | 5  | 5   | 5  | 12  | 0.2  | 1.2 | 1.3 | 2.5  | 3.87E-01 | 5.00E-05 | 1.00E+00 | 2.85E-04 |
| Pla2g1b_chr5   | 0  | 0   | 0  | 4   | 0.0  | 1.0 | 2.2 | 4.5  | 4.28E-01 | 2.20E-03 | 1.00E+00 | 8.52E-03 |
| Pla2g4a_chr1   | 6  | 5   | 9  | 15  | -0.3 | 1.2 | 0.8 | 1.7  | 3.24E-01 | 5.00E-05 | 9.98E-01 | 2.85E-04 |
| Plau_chr14     | 2  | 2   | 3  | 5   | 0.4  | 1.3 | 0.6 | 1.5  | 3.82E-01 | 6.00E-04 | 1.00E+00 | 2.73E-03 |
| Plin2_chr4     | 10 | 11  | 16 | 28  | 0.1  | 1.1 | 0.8 | 1.7  | 6.53E-01 | 5.00E-05 | 1.00E+00 | 2.85E-04 |
| Plod2_chr9     | 2  | 3   | 3  | 6   | 0.1  | 1.1 | 0.8 | 1.8  | 8.19E-01 | 5.00E-05 | 1.00E+00 | 2.85E-04 |
| Pmm1_chr15     | 3  | 4   | 4  | 9   | 0.5  | 1.5 | 1.3 | 2.4  | 1.90E-01 | 5.00E-05 | 9.86E-01 | 2.85E-04 |
| Pnmal2_chr7    | 1  | 1   | 1  | 4   | 0.2  | 1.2 | 1.3 | 2.5  | 8.15E-02 | 5.00E-05 | 8.13E-01 | 2.85E-04 |
| Pno1_chr11     | 10 | 11  | 13 | 20  | 0.1  | 1.1 | 0.6 | 1.5  | 7.16E-01 | 5.00E-05 | 1.00E+00 | 2.85E-04 |
| Pnpt1_chr11    | 14 | 13  | 16 | 24  | -0.1 | 1.0 | 0.6 | 1.5  | 7.82E-01 | 1.50E-04 | 1.00E+00 | 7.89E-04 |
| Pola1_chrX     | 4  | 4   | 7  | 26  | 0.1  | 1.1 | 1.8 | 3.5  | 7.61E-01 | 5.00E-05 | 1.00E+00 | 2.85E-04 |
| Pola2_chr19    | 6  | 7   | 10 | 17  | 0.2  | 1.1 | 0.8 | 1.7  | 3.81E-01 | 9.25E-03 | 9.91E-01 | 2.62E-02 |
| Pold1_chr7     | 10 | 14  | 21 | 34  | 0.4  | 1.4 | 0.7 | 1.6  | 5.19E-02 | 5.00E-05 | 8.48E-01 | 2.85E-04 |
| Pole2_chr12    | 3  | 3   | 4  | 10  | 0.0  | 1.0 | 1.5 | 2.8  | 9.31E-01 | 5.00E-05 | 1.00E+00 | 2.85E-04 |
| Polh_chr17     | 4  | 6   | 7  | 19  | 0.6  | 1.5 | 1.4 | 2.6  | 4.99E-02 | 5.00E-05 | 8.47E-01 | 2.85E-04 |
| Polr2k_chr15   | 19 | 17  | 7  | 18  | -0.2 | 1.1 | 1.2 | 2.3  | 6.63E-01 | 7.58E-03 | 1.00E+00 | 2.23E-02 |
| Polr3k_chr2    | 9  | 9   | 10 | 17  | 0.1  | 1.1 | 0.7 | 1.6  | 5.59E-01 | 5.00E-05 | 1.00E+00 | 2.85E-04 |
| Pop1_chr15     | 2  | 3   | 3  | 5   | 0.6  | 1.5 | 0.8 | 1.8  | 1.22E-01 | 5.00E-05 | 9.52E-01 | 2.85E-04 |
| Pot1b_chr17    | 11 | 12  | 13 | 25  | 0.1  | 1.1 | 0.9 | 1.9  | 7.38E-01 | 5.00E-05 | 1.00E+00 | 2.85E-04 |
| Ppa1_chr10     | 7  | 8   | 8  | 14  | 0.2  | 1.1 | 0.8 | 1.7  | 5.34E-01 | 5.00E-05 | 1.00E+00 | 2.85E-04 |
| Ppid_chr3      | 20 | 23  | 20 | 31  | 0.2  | 1.2 | 0.6 | 1.5  | 3.37E-01 | 5.00E-05 | 9.98E-01 | 2.85E-04 |
| Ppm1l_chr3     | 2  | 2   | 5  | 7   | 0.0  | 1.0 | 0.6 | 1.5  | 9.97E-01 | 1.00E-04 | 1.00E+00 | 5.44E-04 |
| Ppp1cb_chr5    | 58 | 62  | 92 | 189 | 0.1  | 1.1 | 1.0 | 2.1  | 6.91E-01 | 5.00E-05 | 1.00E+00 | 2.85E-04 |
| Ppp1r3e_chr14  | 1  | 1   | 2  | 4   | 0.2  | 1.1 | 1.3 | 2.5  | 2.53E-01 | 5.00E-05 | 9.70E-01 | 2.85E-04 |
| Ppp2r4_chr2    | 31 | 38  | 57 | 94  | 0.3  | 1.2 | 0.7 | 1.7  | 1.79E-01 | 5.00E-05 | 9.85E-01 | 2.85E-04 |
| Ppp2r5b_chr19  | 5  | 6   | 10 | 22  | 0.1  | 1.1 | 1.1 | 2.2  | 6.25E-01 | 5.00E-05 | 1.00E+00 | 2.85E-04 |
| Ppwd1_chr13    | 7  | 9   | 9  | 16  | 0.4  | 1.3 | 0.9 | 1.9  | 1.24E-01 | 5.00E-05 | 9.50E-01 | 2.85E-04 |
| Prdm1_chr10    | 3  | 3   | 5  | 7   | 0.1  | 1.1 | 0.6 | 1.5  | 6.03E-01 | 5.00E-05 | 1.00E+00 | 2.85E-04 |
| Prdx1_chr4     | 95 | 101 | 78 | 128 | 0.1  | 1.1 | 0.7 | 1.6  | 6.45E-01 | 5.00E-05 | 1.00E+00 | 2.85E-04 |
| Prdx3_chr19    | 24 | 28  | 30 | 57  | 0.2  | 1.2 | 0.9 | 1.9  | 3.44E-01 | 5.00E-05 | 9.98E-01 | 2.85E-04 |
| Pre lid2_chr18 | 1  | 1   | 1  | 2   | -0.6 | 1.5 | 0.9 | 1.8  | 3.08E-01 | 1.75E-03 | 9.97E-01 | 6.97E-03 |
| Prkab1_chr5    | 11 | 14  | 22 | 36  | 0.3  | 1.3 | 0.7 | 1.6  | 1.64E-01 | 5.00E-05 | 9.80E-01 | 2.85E-04 |
| Prrg2_chr7     | 1  | 2   | 2  | 3   | 0.2  | 1.1 | 0.7 | 1.6  | 7.39E-01 | 1.60E-03 | 1.00E+00 | 6.43E-03 |
| Psat1_chr19    | 7  | 8   | 10 | 16  | 0.2  | 1.2 | 0.7 | 1.6  | 4.59E-01 | 5.00E-05 | 1.00E+00 | 2.85E-04 |
| Psp1_chr4      | 26 | 25  | 41 | 62  | 0.0  | 1.0 | 0.6 | 1.5  | 8.76E-01 | 2.00E-04 | 1.00E+00 | 1.02E-03 |
| Pσμα1_chr7     | 52 | 58  | 50 | 88  | 0.1  | 1.1 | 0.8 | 1.8  | 4.97E-01 | 5.00E-05 | 1.00E+00 | 2.85E-04 |
| Pσμα2_chr13    | 53 | 52  | 44 | 70  | 0.0  | 1.0 | 0.7 | 1.6  | 9.48E-01 | 5.00E-05 | 1.00E+00 | 2.85E-04 |
| Pσμα4_chr9     | 41 | 43  | 37 | 65  | 0.1  | 1.0 | 0.8 | 1.8  | 7.61E-01 | 5.00E-05 | 1.00E+00 | 2.85E-04 |
| Psmb1_chr17    | 49 | 52  | 47 | 75  | 0.1  | 1.1 | 0.7 | 1.6  | 6.75E-01 | 5.00E-05 | 1.00E+00 | 2.85E-04 |
| Psmb3_chr11    | 40 | 42  | 34 | 53  | 0.1  | 1.0 | 0.6 | 1.5  | 8.31E-01 | 1.00E-04 | 1.00E+00 | 5.44E-04 |
| Psmb5_chr14    | 19 | 24  | 22 | 35  | 0.3  | 1.3 | 0.6 | 1.5  | 2.17E-01 | 5.00E-05 | 9.89E-01 | 2.85E-04 |
| Psmb7_chr2     | 49 | 50  | 43 | 77  | 0.0  | 1.0 | 0.8 | 1.8  | 9.37E-01 | 5.00E-05 | 1.00E+00 | 2.85E-04 |
| Psmc3_chr2     | 35 | 41  | 46 | 70  | 0.2  | 1.2 | 0.6 | 1.5  | 2.58E-01 | 1.50E-04 | 9.93E-01 | 7.89E-04 |
| Psmc3ip_chr11  | 2  | 2   | 2  | 5   | 0.1  | 1.1 | 1.6 | 3.0  | 8.96E-01 | 1.19E-02 | 1.00E+00 | 3.62E-02 |
| Psmc6_chr14    | 35 | 32  | 34 | 72  | -0.1 | 1.1 | 1.1 | 2.1  | 5.27E-01 | 5.00E-05 | 1.00E+00 | 2.85E-04 |
| Psm d13_chr7   | 24 | 26  | 32 | 51  | 0.1  | 1.1 | 0.7 | 1.6  | 6.00E-01 | 5.00E-05 | 1.00E+00 | 2.85E-04 |
| Psm d5_chr2    | 14 | 16  | 22 | 32  | 0.1  | 1.1 | 0.6 | 1.5  | 5.63E-01 | 5.00E-05 | 1.00E+00 | 2.85E-04 |
| Psm d6_chr14   | 20 | 22  | 21 | 36  | 0.1  | 1.1 | 0.8 | 1.7  | 6.97E-01 | 5.00E-05 | 1.00E+00 | 2.85E-04 |
| Psm d9_chr5    | 3  | 4   | 4  | 8   | 0.5  | 1.4 | 0.9 | 1.9  | 1.47E-01 | 5.00E-05 | 9.68E-01 | 2.85E-04 |

|                  |     |     |     |       |      |       |     |       |          |          |          |          |
|------------------|-----|-----|-----|-------|------|-------|-----|-------|----------|----------|----------|----------|
| Psmc3_chr11      | 32  | 43  | 57  | 123   | 0.4  | 1.3   | 1.1 | 2.2   | 4.47E-02 | 5.00E-05 | 8.26E-01 | 2.85E-04 |
| Psmf1_chr2       | 5   | 7   | 9   | 17    | 0.4  | 1.3   | 1.0 | 2.0   | 1.62E-01 | 5.00E-05 | 9.79E-01 | 2.85E-04 |
| Psrc1_chr3       | 1   | 1   | 1   | 4     | 0.0  | 1.0   | 1.9 | 3.7   | 8.98E-01 | 5.00E-05 | 1.00E+00 | 2.70E-04 |
| Pstpip2_chr18    | 8   | 6   | 13  | 20    | -0.3 | 1.2   | 0.6 | 1.5   | 3.11E-01 | 1.50E-04 | 9.97E-01 | 7.89E-04 |
| Ptger3_chr3      | 1   | 1   | 1   | 2     | 0.1  | 1.0   | 1.0 | 2.0   | 1.30E-01 | 1.00E-04 | 9.55E-01 | 5.44E-04 |
| Ptgis_chr2       | 2   | 4   | 4   | 9     | 0.6  | 1.5   | 1.1 | 2.2   | 1.30E-01 | 5.00E-05 | 9.54E-01 | 2.85E-04 |
| Ptgs1_chr2       | 10  | 13  | 21  | 33    | 0.3  | 1.2   | 0.7 | 1.6   | 1.96E-01 | 5.00E-05 | 9.87E-01 | 2.85E-04 |
| Ptplad2_chr4     | 3   | 2   | 5   | 9     | -0.3 | 1.3   | 1.0 | 2.0   | 3.95E-01 | 5.00E-05 | 1.00E+00 | 2.85E-04 |
| Pvrl1_chr9       | 1   | 2   | 2   | 4     | 0.6  | 1.5   | 1.1 | 2.1   | 2.51E-03 | 5.00E-05 | 2.31E-01 | 2.85E-04 |
| Pycr1_chr11      | 0   | 0   | 0   | 2     | 0.0  | 1.0   | 0.7 | 1.6   | 2.42E-01 | 5.00E-05 | 1.00E+00 | 2.85E-04 |
| Pycr2_chr1       | 9   | 10  | 13  | 20    | 0.2  | 1.1   | 0.6 | 1.5   | 5.44E-01 | 2.00E-04 | 1.00E+00 | 1.02E-03 |
| Pydc3_chr1       | 5   | 8   | 8   | 17    | 0.6  | 1.6   | 1.0 | 2.0   | 1.29E-02 | 5.00E-05 | 5.25E-01 | 2.85E-04 |
| Pydc4_chr1       | 2   | 3   | 4   | 11    | 0.5  | 1.4   | 1.5 | 2.9   | 2.19E-01 | 5.00E-05 | 9.91E-01 | 2.85E-04 |
| Pyhin1_chr1      | 30  | 59  | 36  | 100   | 1.0  | 2.0   | 1.5 | 2.8   | 3.27E-06 | 5.00E-05 | 1.12E-03 | 2.85E-04 |
| Rab27b_chr18     | 1   | 1   | 2   | 4     | 0.1  | 1.1   | 1.1 | 2.1   | 7.43E-01 | 5.00E-05 | 1.00E+00 | 2.85E-04 |
| Racgap1_chr15    | 5   | 7   | 8   | 28    | 0.4  | 1.3   | 1.9 | 3.6   | 2.24E-01 | 6.00E-05 | 9.90E-01 | 3.51E-04 |
| Rad21_chr15      | 38  | 49  | 74  | 118   | 0.4  | 1.3   | 0.7 | 1.6   | 8.26E-02 | 1.50E-04 | 9.15E-01 | 7.89E-04 |
| Rad23a_chr8      | 13  | 20  | 22  | 69    | 0.6  | 1.5   | 1.6 | 3.1   | 1.11E-02 | 5.00E-05 | 4.89E-01 | 2.85E-04 |
| Rad51b_chr12     | 0   | 0   | 0   | 2     | 0.0  | 1.0   | 0.8 | 1.7   | 7.05E-01 | 5.00E-05 | 1.00E+00 | 2.49E-04 |
| Rad51c_chr11     | 1   | 1   | 1   | 2     | 0.3  | 1.2   | 0.7 | 1.7   | 5.39E-01 | 1.00E-04 | 1.00E+00 | 5.44E-04 |
| Rad54b_chr4      | 1   | 1   | 1   | 4     | 0.0  | 1.0   | 2.0 | 4.1   | 8.71E-01 | 5.00E-05 | 1.00E+00 | 2.85E-04 |
| Rad54l_chr4      | 2   | 2   | 2   | 12    | 0.1  | 1.1   | 2.4 | 5.3   | 8.79E-01 | 6.00E-05 | 1.00E+00 | 3.51E-04 |
| Ran_chr5         | 37  | 49  | 48  | 81    | 0.4  | 1.3   | 0.8 | 1.7   | 5.04E-02 | 5.00E-05 | 8.48E-01 | 2.85E-04 |
| Ranbp1_chr16     | 28  | 32  | 38  | 63    | 0.2  | 1.1   | 0.7 | 1.7   | 4.24E-01 | 5.00E-05 | 1.00E+00 | 2.85E-04 |
| Rangap1_chr15    | 15  | 23  | 25  | 41    | 0.6  | 1.5   | 0.7 | 1.7   | 5.57E-03 | 3.27E-02 | 3.64E-01 | 6.51E-02 |
| Rap1a_chr3       | 108 | 113 | 105 | 165   | 0.1  | 1.0   | 0.7 | 1.6   | 7.93E-01 | 5.00E-05 | 1.00E+00 | 2.85E-04 |
| Rasgrp4_chr7     | 2   | 3   | 4   | 9     | 0.3  | 1.2   | 1.1 | 2.1   | 4.56E-01 | 5.07E-03 | 9.99E-01 | 1.60E-02 |
| Rb1_chr14        | 23  | 22  | 39  | 60    | -0.1 | 1.0   | 0.6 | 1.5   | 8.12E-01 | 5.00E-04 | 1.00E+00 | 2.32E-03 |
| Rbbp4_chr4       | 32  | 37  | 42  | 65    | 0.2  | 1.1   | 0.6 | 1.6   | 3.57E-01 | 5.00E-05 | 9.98E-01 | 2.85E-04 |
| Rbbp8_chr18      | 5   | 5   | 7   | 18    | -0.1 | 1.0   | 1.3 | 2.5   | 8.18E-01 | 5.00E-05 | 1.00E+00 | 2.85E-04 |
| Rbks_chr5        | 2   | 3   | 3   | 5     | 0.1  | 1.1   | 0.8 | 1.7   | 8.10E-01 | 3.00E-04 | 1.00E+00 | 1.47E-03 |
| Rbm38_chr2       | 23  | 32  | 49  | 112   | 0.5  | 1.4   | 1.2 | 2.3   | 2.20E-02 | 5.00E-05 | 6.59E-01 | 2.85E-04 |
| Rbm43_chr2       | 8   | 10  | 11  | 15    | 0.2  | 1.2   | 0.7 | 1.6   | 5.71E-01 | 3.90E-02 | 1.00E+00 | 8.41E-02 |
| Rbm44_chr1       | 0   | 0   | 0   | 5     | 0.0  | 1.0   | 2.5 | 5.5   | 6.46E-01 | 5.00E-05 | 1.00E+00 | 2.85E-04 |
| Rbm47_chr5       | 2   | 3   | 5   | 8     | 0.3  | 1.2   | 0.8 | 1.7   | 3.01E-01 | 5.00E-05 | 9.92E-01 | 2.85E-04 |
| Rbpms2_chr9      | 1   | 2   | 2   | 4     | 0.6  | 1.5   | 0.6 | 1.5   | 1.77E-01 | 8.50E-04 | 9.84E-01 | 3.72E-03 |
| Rcc1_chr4        | 6   | 7   | 9   | 20    | 0.2  | 1.1   | 1.1 | 2.2   | 5.68E-01 | 5.92E-03 | 1.00E+00 | 1.81E-02 |
| Reep4_chr14      | 4   | 8   | 6   | 17    | 1.0  | 2.1   | 1.5 | 2.7   | 1.05E-03 | 5.00E-05 | 1.26E-01 | 2.85E-04 |
| Reg2_chr6        | 0   | 0   | 0   | 106   | 0.0  | 1.0   | 6.7 | 106.5 | 6.57E-01 | 5.00E-05 | 1.00E+00 | 2.85E-04 |
| Reg3a_chr6       | 0   | 0   | 0   | 2     | 0.0  | 1.0   | 0.9 | 1.9   | 1.00E+00 | 5.00E-05 | 1.00E+00 | 2.85E-04 |
| Reg3b_chr6       | 0   | 0   | 0   | 7     | 0.0  | 1.0   | 2.7 | 6.7   | 1.00E+00 | 5.00E-05 | 1.00E+00 | 2.85E-04 |
| Reln_chr5        | 0   | 0   | 1   | 2     | 0.0  | 1.0   | 0.8 | 1.8   | 8.10E-01 | 5.00E-05 | 1.00E+00 | 2.85E-04 |
| Relt_chr7        | 9   | 10  | 15  | 28    | 0.2  | 1.2   | 0.9 | 1.9   | 3.91E-01 | 5.00E-05 | 1.00E+00 | 2.85E-04 |
| Rexo2_chr9       | 26  | 35  | 27  | 59    | 0.5  | 1.4   | 1.1 | 2.2   | 4.94E-02 | 5.00E-05 | 8.46E-01 | 2.85E-04 |
| Rfc3_chr5        | 5   | 7   | 7   | 13    | 0.6  | 1.5   | 0.8 | 1.8   | 9.48E-02 | 5.00E-05 | 9.27E-01 | 2.85E-04 |
| Rfc5_chr5        | 6   | 7   | 10  | 18    | 0.3  | 1.2   | 0.9 | 1.9   | 3.81E-01 | 5.00E-05 | 1.00E+00 | 2.85E-04 |
| Rfesd_chr13      | 3   | 3   | 3   | 5     | 0.0  | 1.0   | 0.6 | 1.5   | 8.84E-01 | 8.50E-03 | 1.00E+00 | 2.55E-02 |
| Rffl_chr11       | 6   | 5   | 1   | 6     | -0.1 | 1.1   | 2.1 | 4.2   | 8.06E-01 | 3.80E-03 | 1.00E+00 | 1.47E-02 |
| Rfwd3_chr8       | 13  | 15  | 25  | 45    | 0.3  | 1.2   | 0.8 | 1.8   | 2.07E-01 | 5.00E-05 | 9.88E-01 | 2.85E-04 |
| Rgs12_chr5       | 2   | 4   | 3   | 9     | 0.6  | 1.6   | 1.6 | 3.0   | 3.82E-01 | 5.00E-05 | 6.43E-01 | 2.97E-04 |
| Rgs18_chr1       | 13  | 12  | 14  | 33    | 0.0  | 1.0   | 1.2 | 2.3   | 9.06E-01 | 5.00E-05 | 1.00E+00 | 2.85E-04 |
| Rhbdd3_chr11     | 2   | 3   | 3   | 5     | 0.1  | 1.1   | 0.7 | 1.6   | 7.18E-01 | 1.50E-04 | 1.00E+00 | 7.89E-04 |
| Rims3_chr4       | 3   | 3   | 7   | 14    | -0.2 | 1.1   | 0.9 | 1.9   | 7.48E-01 | 5.00E-05 | 1.00E+00 | 2.85E-04 |
| Riok3_chr18      | 22  | 26  | 37  | 58    | 0.2  | 1.2   | 0.6 | 1.6   | 2.92E-01 | 5.00E-05 | 9.96E-01 | 2.85E-04 |
| Rmdn3_chr2       | 7   | 8   | 12  | 22    | 0.2  | 1.1   | 0.8 | 1.8   | 4.72E-01 | 5.00E-05 | 1.00E+00 | 2.85E-04 |
| Rmi2_chr16       | 1   | 1   | 1   | 2     | 0.0  | 1.0   | 0.9 | 1.8   | 5.30E-01 | 5.00E-05 | 1.00E+00 | 2.85E-04 |
| Rmrp_chr4        | 7   | 91  | 3   | 10    | 3.6  | 12.3  | 1.5 | 2.8   | 1.00E-20 | 5.00E-05 | 1.00E-20 | 2.82E-04 |
| Rn45s_chr17      | 287 | 0   | 476 | 962   | -8.2 | 287.3 | 1.0 | 2.0   | 1.00E+00 | 6.00E-04 | 1.00E+00 | 2.70E-03 |
| Rnase4_chr14     | 6   | 9   | 7   | 10    | 0.6  | 1.6   | 0.6 | 1.5   | 3.82E-02 | 7.88E-04 | 7.90E-01 | 3.52E-03 |
| Rnaseh2a_chr8    | 4   | 5   | 4   | 7     | 0.4  | 1.3   | 0.7 | 1.6   | 2.10E-01 | 1.00E-04 | 9.88E-01 | 5.44E-04 |
| Rnaseh2c_chr19   | 12  | 13  | 12  | 18    | 0.1  | 1.1   | 0.6 | 1.5   | 6.71E-01 | 4.00E-04 | 1.00E+00 | 1.91E-03 |
| Rnf10_chr5       | 39  | 50  | 88  | 165   | 0.4  | 1.3   | 0.9 | 1.9   | 6.40E-02 | 5.00E-05 | 8.76E-01 | 2.85E-04 |
| Rnf11_chr4       | 19  | 22  | 29  | 57    | 0.2  | 1.2   | 1.0 | 2.0   | 3.60E-01 | 5.00E-05 | 9.98E-01 | 2.85E-04 |
| Rnf123_chr9      | 23  | 20  | 47  | 99    | -0.2 | 1.1   | 1.1 | 2.1   | 4.16E-01 | 5.00E-05 | 1.00E+00 | 2.85E-04 |
| Rnf139_chr15     | 13  | 13  | 17  | 27    | 0.0  | 1.0   | 0.7 | 1.6   | 9.84E-01 | 5.00E-05 | 1.00E+00 | 2.85E-04 |
| Rnf168_chr16     | 5   | 6   | 8   | 12    | 0.0  | 1.0   | 0.6 | 1.5   | 8.39E-01 | 2.00E-04 | 1.00E+00 | 1.02E-03 |
| Rnf26_chr9       | 4   | 6   | 10  | 23    | 0.6  | 1.5   | 1.2 | 2.3   | 6.44E-02 | 5.00E-05 | 8.76E-01 | 2.85E-04 |
| Rpa2_chr4        | 8   | 12  | 12  | 21    | 0.5  | 1.4   | 0.8 | 1.8   | 6.69E-02 | 5.00E-05 | 8.76E-01 | 2.85E-04 |
| Rpa3_chr6        | 15  | 16  | 10  | 32    | 0.1  | 1.1   | 1.7 | 3.3   | 7.43E-01 | 5.00E-05 | 1.00E+00 | 2.85E-04 |
| Rpain_chr11      | 6   | 6   | 6   | 10    | 0.0  | 1.0   | 0.8 | 1.7   | 9.23E-01 | 1.57E-02 | 1.00E+00 | 4.60E-02 |
| Rpe_chr1         | 14  | 15  | 18  | 27    | 0.2  | 1.1   | 0.6 | 1.6   | 5.83E-01 | 3.05E-03 | 1.00E+00 | 1.13E-02 |
| Rpgrip1l_chr8    | 1   | 1   | 1   | 2     | 0.0  | 1.0   | 0.9 | 1.9   | 3.72E-01 | 5.00E-05 | 1.00E+00 | 2.85E-04 |
| Rpl22l1_chr3     | 108 | 116 | 69  | 152   | 0.1  | 1.1   | 1.1 | 2.2   | 6.36E-01 | 5.00E-05 | 1.00E+00 | 2.85E-04 |
| Rpl31-ps12_chr16 | 19  | 16  | 15  | 31    | -0.3 | 1.2   | 1.0 | 2.0   | 4.45E-01 | 5.00E-05 | 1.00E+00 | 2.85E-04 |
| Rpl36al_chr12    | 152 | 170 | 111 | 178   | 0.2  | 1.1   | 0.7 | 1.6   | 4.51E-01 | 5.00E-05 | 1.00E+00 | 2.85E-04 |
| Rpl39_chrX       | 822 | 758 | 676 | 1,032 | -0.1 | 1.1   | 0.6 | 1.5   | 6.17E-01 | 1.50E-04 | 1.00E+00 | 7.89E-04 |
| Rpph1_chr14      | 2   | 45  | 1   | 10    | 4.4  | 20.5  | 2.9 | 7.6   | 3.77E-15 | 5.00E-05 | 4.95E-12 | 2.82E-04 |
| Rps15a-ps4_chr4  | 7   | 6   | 3   | 6     | -0.2 | 1.1   | 0.9 | 1.9   | 6.47E-01 | 5.00E-05 | 1.00E+00 | 2.82E-04 |
| Rps19-ps3_chr4   | 1   | 2   | 1   | 2     | 0.9  | 1.9   | 0.7 | 1.6   | 9.86E-02 | 1.25E-03 | 9.25E-01 | 5.15E-03 |
| Rps27a_chr11     | 239 | 238 | 255 | 489   | 0.1  | 1.0   | 1.0 | 2.0   | 9.57E-01 | 2.11E-02 | 1.00E+00 | 4.70E-02 |
| Rps27l_chr9      | 29  | 28  | 17  | 51    | -0.1 | 1.1   | 1.6 | 3.0   | 7.81E-01 | 5.00E-05 | 1.00E+00 | 2.85E-04 |

|                 |     |     |     |     |      |     |     |      |          |          |          |          |
|-----------------|-----|-----|-----|-----|------|-----|-----|------|----------|----------|----------|----------|
| Rps7_chr12      | 536 | 528 | 427 | 670 | 0.0  | 1.0 | 0.6 | 1.6  | 9.40E-01 | 1.50E-04 | 1.00E+00 | 7.89E-04 |
| Rtn2_chr7       | 1   | 1   | 1   | 2   | 0.2  | 1.2 | 0.6 | 1.6  | 3.86E-01 | 1.04E-02 | 9.98E-01 | 2.87E-02 |
| Rtn4r12_chr2    | 0   | 0   | 0   | 2   | 0.0  | 1.0 | 0.8 | 1.8  | 4.30E-02 | 5.00E-05 | 1.00E+00 | 2.85E-04 |
| Rtp4_chr16      | 5   | 8   | 5   | 22  | 0.6  | 1.6 | 2.1 | 4.3  | 3.94E-02 | 5.00E-05 | 7.96E-01 | 2.85E-04 |
| Rwdd3_chr3      | 1   | 2   | 1   | 2   | 0.8  | 1.7 | 0.6 | 1.5  | 1.80E-01 | 9.73E-03 | 9.87E-01 | 3.03E-02 |
| S100a1_chr3     | 7   | 6   | 5   | 8   | -0.1 | 1.1 | 0.8 | 1.7  | 8.67E-01 | 5.00E-05 | 1.00E+00 | 2.85E-04 |
| S100a4_chr3     | 63  | 89  | 40  | 100 | 0.5  | 1.4 | 1.3 | 2.5  | 3.38E-02 | 5.00E-05 | 7.66E-01 | 2.85E-04 |
| S1pr5_chr9      | 1   | 1   | 1   | 2   | 0.0  | 1.0 | 0.7 | 1.6  | 6.79E-01 | 1.60E-03 | 1.00E+00 | 6.43E-03 |
| Samd1_chr8      | 6   | 7   | 9   | 17  | 0.3  | 1.2 | 1.0 | 2.0  | 3.13E-01 | 5.00E-05 | 9.97E-01 | 2.85E-04 |
| Samd11_chr4     | 2   | 3   | 3   | 21  | 0.4  | 1.3 | 3.0 | 8.1  | 5.38E-01 | 5.00E-05 | 1.00E+00 | 2.85E-04 |
| Samd3_chr10     | 2   | 2   | 2   | 3   | 0.3  | 1.2 | 0.7 | 1.6  | 4.92E-01 | 1.00E-03 | 1.00E+00 | 4.35E-03 |
| Sap30_chr8      | 2   | 3   | 2   | 7   | 0.2  | 1.1 | 1.4 | 2.7  | 7.00E-01 | 5.00E-05 | 1.00E+00 | 2.85E-04 |
| Sar1b_chr11     | 17  | 17  | 18  | 28  | 0.0  | 1.0 | 0.6 | 1.6  | 9.20E-01 | 5.00E-05 | 1.00E+00 | 2.85E-04 |
| Sarnp_chr10     | 35  | 40  | 28  | 52  | 0.2  | 1.1 | 0.9 | 1.8  | 3.84E-01 | 5.00E-05 | 1.00E+00 | 2.85E-04 |
| Sass6_chr3      | 3   | 3   | 5   | 12  | 0.0  | 1.0 | 1.3 | 2.4  | 9.49E-01 | 5.00E-05 | 1.00E+00 | 2.85E-04 |
| Scel_chr14      | 1   | 1   | 1   | 2   | 0.0  | 1.0 | 1.1 | 2.1  | 1.09E-01 | 5.00E-05 | 9.38E-01 | 2.85E-04 |
| Scfd1_chr12     | 20  | 18  | 25  | 38  | -0.1 | 1.1 | 0.6 | 1.5  | 5.61E-01 | 5.00E-05 | 1.00E+00 | 2.85E-04 |
| Scly_chr1       | 7   | 8   | 12  | 20  | 0.3  | 1.3 | 0.7 | 1.7  | 2.23E-01 | 5.00E-05 | 9.91E-01 | 2.85E-04 |
| Scoc_chr8       | 10  | 11  | 10  | 30  | 0.1  | 1.1 | 1.6 | 3.0  | 6.53E-01 | 5.00E-05 | 1.00E+00 | 2.85E-04 |
| Sdc1_chr12      | 3   | 5   | 7   | 11  | 0.7  | 1.7 | 0.7 | 1.6  | 9.85E-03 | 5.00E-05 | 4.59E-01 | 2.85E-04 |
| Sdcbp_chr4      | 52  | 50  | 70  | 150 | 0.0  | 1.0 | 1.1 | 2.1  | 8.01E-01 | 5.17E-04 | 1.00E+00 | 2.32E-03 |
| Sdf211_chr16    | 11  | 14  | 16  | 27  | 0.4  | 1.3 | 0.8 | 1.7  | 1.84E-01 | 5.00E-05 | 9.86E-01 | 2.85E-04 |
| Sdhd_chr9       | 25  | 28  | 26  | 45  | 0.2  | 1.1 | 0.8 | 1.7  | 4.01E-01 | 5.00E-05 | 1.00E+00 | 2.85E-04 |
| Sec11c_chr18    | 44  | 52  | 36  | 59  | 0.2  | 1.2 | 0.7 | 1.6  | 2.96E-01 | 5.00E-05 | 9.96E-01 | 2.85E-04 |
| Sec61b_chr4     | 50  | 47  | 32  | 49  | -0.1 | 1.1 | 0.6 | 1.5  | 7.32E-01 | 1.50E-04 | 1.00E+00 | 7.89E-04 |
| Sec61g_chr11    | 36  | 35  | 16  | 59  | 0.1  | 1.0 | 2.0 | 3.9  | 7.44E-01 | 9.17E-05 | 1.00E+00 | 5.18E-04 |
| Selp_chr1       | 0   | 1   | 1   | 3   | 0.0  | 1.0 | 1.6 | 3.0  | 1.10E-01 | 5.00E-05 | 9.38E-01 | 2.85E-04 |
| Sept1_chr4      | 2   | 3   | 5   | 8   | 0.7  | 1.6 | 0.7 | 1.6  | 3.07E-02 | 5.00E-05 | 7.45E-01 | 2.85E-04 |
| Sept3_chr15     | 1   | 0   | 1   | 2   | 0.0  | 1.0 | 0.9 | 1.8  | 3.05E-01 | 5.00E-05 | 9.96E-01 | 2.85E-04 |
| Sept8_chr11     | 4   | 4   | 5   | 17  | 0.0  | 1.0 | 1.8 | 3.5  | 8.11E-01 | 5.00E-05 | 1.00E+00 | 3.08E-04 |
| Serpina3b_chr12 | 0   | 0   | 0   | 2   | 0.0  | 1.0 | 0.7 | 1.6  | 3.18E-01 | 5.00E-05 | 1.00E+00 | 2.85E-04 |
| Serpina3f_chr12 | 14  | 14  | 4   | 21  | 0.0  | 1.0 | 2.4 | 5.1  | 9.58E-01 | 5.00E-05 | 1.00E+00 | 2.88E-04 |
| Serpini2_chr3   | 0   | 0   | 0   | 4   | 0.0  | 1.0 | 2.1 | 4.4  | 2.17E-01 | 5.00E-05 | 1.00E+00 | 2.85E-04 |
| Sesn2_chr4      | 3   | 5   | 9   | 17  | 0.5  | 1.4 | 1.0 | 2.0  | 9.05E-02 | 5.00E-05 | 9.27E-01 | 2.85E-04 |
| Setd8_chr5      | 14  | 16  | 22  | 47  | 0.1  | 1.1 | 1.1 | 2.1  | 5.18E-01 | 5.00E-05 | 1.00E+00 | 2.85E-04 |
| Sf3b6_chr12     | 17  | 18  | 13  | 26  | 0.1  | 1.1 | 1.1 | 2.1  | 6.26E-01 | 5.00E-05 | 1.00E+00 | 2.85E-04 |
| Sgk3_chr1       | 6   | 6   | 3   | 15  | 0.2  | 1.2 | 2.3 | 4.9  | 7.26E-01 | 5.00E-05 | 9.08E-01 | 3.24E-04 |
| Sh2d1b1_chr1    | 4   | 6   | 5   | 12  | 0.6  | 1.5 | 1.4 | 2.6  | 1.09E-01 | 5.00E-05 | 9.38E-01 | 2.85E-04 |
| Sh2d4a_chr8     | 1   | 2   | 2   | 6   | 0.7  | 1.6 | 1.5 | 2.9  | 8.04E-02 | 5.00E-05 | 9.08E-01 | 2.85E-04 |
| Sh3glb1_chr3    | 26  | 29  | 38  | 59  | 0.2  | 1.1 | 0.6 | 1.6  | 4.02E-01 | 5.00E-05 | 1.00E+00 | 2.85E-04 |
| Shfm1_chr6      | 72  | 74  | 44  | 73  | 0.0  | 1.0 | 0.7 | 1.7  | 8.64E-01 | 5.00E-05 | 1.00E+00 | 2.85E-04 |
| Shmt2_chr10     | 7   | 10  | 12  | 19  | 0.4  | 1.3 | 0.7 | 1.6  | 2.84E-01 | 2.31E-02 | 9.56E-01 | 5.50E-02 |
| Siglec5_chr7    | 0   | 0   | 0   | 2   | 0.0  | 1.0 | 0.8 | 1.7  | 7.42E-01 | 5.00E-05 | 1.00E+00 | 2.85E-04 |
| Sirpb1a_chr3    | 8   | 10  | 10  | 29  | 0.3  | 1.2 | 1.5 | 2.9  | 3.53E-01 | 5.00E-05 | 9.98E-01 | 2.85E-04 |
| Siva1_chr12     | 4   | 5   | 4   | 8   | 0.4  | 1.3 | 0.9 | 1.9  | 4.46E-01 | 5.00E-05 | 1.00E+00 | 2.85E-04 |
| Six5_chr7       | 1   | 2   | 2   | 4   | 0.4  | 1.3 | 0.8 | 1.8  | 3.76E-01 | 5.00E-05 | 1.00E+00 | 2.85E-04 |
| Ska2_chr11      | 6   | 7   | 8   | 23  | 0.1  | 1.1 | 1.5 | 2.9  | 7.69E-01 | 5.00E-05 | 1.00E+00 | 2.85E-04 |
| Skp2_chr15      | 3   | 3   | 4   | 8   | 0.1  | 1.1 | 1.2 | 2.3  | 7.60E-01 | 5.00E-05 | 1.00E+00 | 2.92E-04 |
| Slamf8_chr1     | 4   | 6   | 6   | 12  | 0.6  | 1.5 | 0.9 | 1.8  | 4.12E-02 | 5.00E-05 | 8.10E-01 | 2.85E-04 |
| Slamf9_chr1     | 3   | 2   | 3   | 5   | -0.4 | 1.4 | 0.7 | 1.7  | 3.28E-01 | 2.50E-04 | 9.98E-01 | 1.25E-03 |
| Slbp_chr5       | 22  | 30  | 28  | 73  | 0.4  | 1.4 | 1.4 | 2.6  | 4.45E-02 | 5.00E-05 | 8.26E-01 | 2.85E-04 |
| Slc11a1_chr1    | 13  | 14  | 25  | 41  | 0.1  | 1.1 | 0.7 | 1.6  | 7.01E-01 | 5.00E-05 | 1.00E+00 | 2.85E-04 |
| Slc11a2_chr15   | 4   | 5   | 7   | 15  | 0.3  | 1.2 | 1.2 | 2.3  | 3.77E-01 | 5.00E-05 | 9.95E-01 | 2.92E-04 |
| Slc14a1_chr18   | 7   | 7   | 2   | 16  | 0.0  | 1.0 | 2.8 | 6.9  | 6.80E-01 | 5.00E-05 | 1.00E+00 | 2.99E-04 |
| Slc16a1_chr3    | 10  | 14  | 17  | 55  | 0.4  | 1.3 | 1.7 | 3.3  | 4.91E-02 | 5.00E-05 | 8.46E-01 | 2.85E-04 |
| Slc16a4_chr3    | 1   | 1   | 1   | 3   | 0.0  | 1.0 | 0.9 | 1.8  | 6.55E-01 | 5.00E-05 | 1.00E+00 | 2.85E-04 |
| Slc22a15_chr3   | 1   | 1   | 1   | 2   | 0.0  | 1.0 | 0.7 | 1.7  | 7.18E-01 | 5.00E-05 | 1.00E+00 | 2.85E-04 |
| Slc25a17_chr15  | 7   | 11  | 9   | 17  | 0.6  | 1.5 | 0.9 | 1.8  | 2.14E-02 | 5.00E-05 | 6.47E-01 | 2.85E-04 |
| Slc25a24_chr3   | 5   | 5   | 8   | 12  | 0.0  | 1.0 | 0.6 | 1.5  | 9.71E-01 | 1.00E-04 | 1.00E+00 | 5.44E-04 |
| Slc25a42_chr8   | 3   | 3   | 6   | 9   | -0.2 | 1.1 | 0.6 | 1.5  | 5.70E-01 | 1.50E-04 | 1.00E+00 | 7.89E-04 |
| Slc25a51_chr4   | 15  | 19  | 28  | 80  | 0.3  | 1.3 | 1.5 | 2.9  | 1.17E-01 | 5.00E-05 | 9.46E-01 | 2.85E-04 |
| Slc26a1_chr5    | 1   | 1   | 2   | 7   | 0.0  | 1.0 | 1.8 | 3.4  | 7.13E-01 | 5.00E-05 | 1.00E+00 | 2.85E-04 |
| Slc30a9_chr5    | 13  | 13  | 19  | 32  | 0.0  | 1.0 | 0.8 | 1.7  | 8.75E-01 | 5.00E-05 | 1.00E+00 | 2.85E-04 |
| Slc35g1_chr19   | 2   | 2   | 4   | 6   | -0.3 | 1.2 | 0.6 | 1.5  | 3.82E-01 | 5.00E-05 | 1.00E+00 | 2.85E-04 |
| Slc39a4_chr15   | 1   | 1   | 1   | 2   | 0.0  | 1.0 | 1.0 | 1.9  | 9.85E-02 | 5.00E-05 | 9.35E-01 | 2.85E-04 |
| Slc39a8_chr3    | 1   | 2   | 2   | 6   | 0.5  | 1.4 | 1.7 | 3.2  | 3.45E-01 | 5.00E-05 | 9.96E-01 | 2.70E-04 |
| Slc43a1_chr2    | 2   | 3   | 1   | 30  | 0.6  | 1.5 | 4.6 | 24.3 | 2.51E-01 | 5.00E-05 | 9.70E-01 | 2.90E-04 |
| Slc45a4_chr15   | 2   | 4   | 8   | 14  | 0.9  | 1.9 | 0.7 | 1.7  | 8.10E-02 | 2.23E-02 | 9.10E-01 | 5.48E-02 |
| Slc48a1_chr15   | 19  | 26  | 37  | 70  | 0.4  | 1.3 | 0.9 | 1.9  | 2.25E-01 | 2.55E-03 | 9.91E-01 | 9.70E-03 |
| Slc6a4_chr11    | 1   | 2   | 2   | 5   | 1.0  | 2.0 | 1.7 | 3.3  | 3.20E-03 | 5.00E-05 | 2.70E-01 | 2.85E-04 |
| Slc8a2_chr7     | 0   | 1   | 1   | 2   | 0.0  | 1.0 | 1.0 | 1.9  | 1.25E-01 | 5.00E-05 | 9.50E-01 | 2.85E-04 |
| Slfn1_chr11     | 15  | 12  | 15  | 32  | -0.3 | 1.2 | 1.1 | 2.1  | 2.36E-01 | 5.00E-05 | 9.66E-01 | 2.85E-04 |
| Slfn3_chr11     | 3   | 2   | 4   | 12  | -0.3 | 1.2 | 1.5 | 2.9  | 4.82E-01 | 5.00E-05 | 1.00E+00 | 2.85E-04 |
| Slfn5_chr11     | 11  | 13  | 17  | 30  | 0.2  | 1.1 | 0.8 | 1.8  | 3.53E-01 | 5.00E-05 | 9.98E-01 | 2.85E-04 |
| Slfn9_chr11     | 1   | 1   | 2   | 6   | 0.1  | 1.1 | 1.3 | 2.5  | 7.57E-01 | 5.00E-05 | 1.00E+00 | 2.85E-04 |
| Slmo2_chr2      | 14  | 17  | 16  | 26  | 0.2  | 1.2 | 0.7 | 1.6  | 3.37E-01 | 5.00E-05 | 9.98E-01 | 2.85E-04 |
| Smap1_chr1      | 13  | 17  | 21  | 42  | 0.4  | 1.3 | 1.0 | 2.0  | 8.71E-02 | 5.00E-05 | 9.22E-01 | 2.85E-04 |
| Smc4_chr3       | 49  | 49  | 66  | 117 | 0.0  | 1.0 | 0.8 | 1.8  | 9.47E-01 | 5.00E-05 | 1.00E+00 | 2.85E-04 |
| Smim24_chr10    | 1   | 2   | 2   | 2   | 1.1  | 2.2 | 0.6 | 1.5  | 8.53E-02 | 3.43E-02 | 9.18E-01 | 8.74E-02 |
| Smim4_chr14     | 6   | 6   | 5   | 9   | 0.0  | 1.0 | 0.8 | 1.7  | 9.70E-01 | 5.00E-04 | 1.00E+00 | 2.30E-03 |
| Smim7_chr8      | 10  | 12  | 11  | 20  | 0.3  | 1.2 | 0.8 | 1.8  | 1.94E-01 | 5.00E-05 | 9.87E-01 | 2.85E-04 |

|                  |    |    |    |     |      |     |     |      |          |          |          |          |
|------------------|----|----|----|-----|------|-----|-----|------|----------|----------|----------|----------|
| Smox_chr2        | 3  | 4  | 8  | 46  | 0.4  | 1.4 | 2.4 | 5.4  | 8.47E-01 | 1.71E-02 | 1.00E+00 | 4.72E-02 |
| Snca_chr6        | 22 | 39 | 27 | 139 | 0.8  | 1.8 | 2.3 | 4.8  | 8.19E-02 | 3.50E-04 | 3.63E-01 | 1.62E-03 |
| Snhg1_chr19      | 30 | 28 | 18 | 35  | -0.1 | 1.1 | 1.0 | 1.9  | 7.84E-01 | 5.00E-05 | 1.00E+00 | 2.82E-04 |
| Snhg3_chr4       | 15 | 15 | 6  | 16  | 0.1  | 1.0 | 1.5 | 2.8  | 8.60E-01 | 5.00E-05 | 1.00E+00 | 2.82E-04 |
| Snhg5_chr9       | 14 | 14 | 11 | 23  | 0.0  | 1.0 | 1.1 | 2.1  | 9.77E-01 | 5.00E-05 | 1.00E+00 | 2.82E-04 |
| Snhg6_chr1       | 8  | 8  | 5  | 10  | 0.1  | 1.1 | 1.1 | 2.1  | 7.85E-01 | 5.00E-05 | 1.00E+00 | 2.82E-04 |
| Snrnp27_chr6     | 20 | 20 | 13 | 21  | 0.0  | 1.0 | 0.7 | 1.6  | 9.55E-01 | 2.00E-04 | 1.00E+00 | 1.02E-03 |
| Snrpb2_chr2      | 21 | 21 | 17 | 28  | 0.0  | 1.0 | 0.8 | 1.7  | 9.33E-01 | 5.00E-05 | 1.00E+00 | 2.85E-04 |
| Snrpd1_chr18     | 24 | 26 | 14 | 30  | 0.1  | 1.1 | 1.0 | 2.1  | 6.92E-01 | 5.00E-05 | 1.00E+00 | 2.85E-04 |
| Snrpd2_chr7      | 36 | 44 | 30 | 55  | 0.3  | 1.2 | 0.9 | 1.9  | 2.32E-01 | 5.00E-05 | 9.91E-01 | 2.85E-04 |
| Snrpe_chr1       | 63 | 70 | 39 | 77  | 0.2  | 1.1 | 1.0 | 2.0  | 4.68E-01 | 5.00E-05 | 1.00E+00 | 2.85E-04 |
| Snrpg_chr6       | 83 | 94 | 49 | 91  | 0.2  | 1.1 | 0.9 | 1.9  | 4.43E-01 | 5.00E-05 | 1.00E+00 | 2.85E-04 |
| Snx10_chr6       | 7  | 7  | 8  | 17  | 0.0  | 1.0 | 1.1 | 2.1  | 9.07E-01 | 2.47E-02 | 1.00E+00 | 4.84E-02 |
| Snx15_chr19      | 5  | 8  | 10 | 21  | 0.6  | 1.5 | 1.1 | 2.1  | 4.67E-02 | 5.00E-05 | 8.39E-01 | 2.85E-04 |
| Snx22_chr9       | 9  | 8  | 11 | 28  | -0.2 | 1.2 | 1.3 | 2.4  | 6.04E-01 | 5.00E-05 | 1.00E+00 | 2.85E-04 |
| Socs1_chr16      | 1  | 2  | 1  | 3   | 0.3  | 1.2 | 1.0 | 1.9  | 6.29E-01 | 1.50E-04 | 1.00E+00 | 7.89E-04 |
| Sod1_chr16       | 66 | 81 | 56 | 85  | 0.3  | 1.2 | 0.6 | 1.5  | 1.71E-01 | 1.00E-04 | 9.81E-01 | 5.44E-04 |
| Sox12_chr2       | 1  | 1  | 2  | 3   | 0.2  | 1.1 | 0.7 | 1.7  | 2.72E-01 | 5.00E-05 | 9.94E-01 | 2.85E-04 |
| Spata24_chr18    | 2  | 2  | 2  | 4   | 0.1  | 1.1 | 1.3 | 2.5  | 8.90E-01 | 5.17E-04 | 1.00E+00 | 2.34E-03 |
| Spcs1_chr14      | 29 | 30 | 21 | 45  | 0.1  | 1.0 | 1.1 | 2.2  | 8.70E-01 | 2.50E-04 | 1.00E+00 | 1.25E-03 |
| Sphk1_chr11      | 1  | 2  | 1  | 8   | 0.1  | 1.1 | 2.5 | 5.5  | 8.90E-01 | 5.00E-05 | 1.00E+00 | 2.89E-04 |
| Spic_chr10       | 36 | 40 | 41 | 67  | 0.1  | 1.1 | 0.7 | 1.7  | 5.06E-01 | 5.00E-05 | 1.00E+00 | 2.85E-04 |
| Spon2_chr5       | 1  | 4  | 1  | 2   | 2.0  | 4.1 | 0.6 | 1.6  | 4.97E-08 | 2.90E-03 | 3.19E-05 | 1.08E-02 |
| Spp1_chr5        | 0  | 0  | 0  | 2   | 0.0  | 1.0 | 0.6 | 1.5  | 9.64E-01 | 5.00E-05 | 1.00E+00 | 2.61E-04 |
| Sspl2b_chr10     | 6  | 6  | 11 | 37  | 0.1  | 1.0 | 1.7 | 3.3  | 8.05E-01 | 5.00E-05 | 1.00E+00 | 2.85E-04 |
| Srm_chr4         | 8  | 12 | 14 | 24  | 0.5  | 1.4 | 0.7 | 1.7  | 6.08E-02 | 5.00E-05 | 8.75E-01 | 2.85E-04 |
| Srp19_chr18      | 18 | 20 | 14 | 26  | 0.1  | 1.1 | 0.9 | 1.9  | 7.50E-01 | 5.00E-05 | 1.00E+00 | 2.85E-04 |
| Srsf2_chr11      | 67 | 86 | 82 | 137 | 0.4  | 1.3 | 0.8 | 1.7  | 9.05E-02 | 5.00E-05 | 9.27E-01 | 2.85E-04 |
| Srxn1_chr2       | 2  | 2  | 3  | 6   | 0.2  | 1.2 | 0.9 | 1.9  | 6.00E-01 | 5.00E-05 | 1.00E+00 | 2.85E-04 |
| Ssbp3_chr4       | 6  | 8  | 8  | 13  | 0.4  | 1.3 | 0.7 | 1.7  | 1.31E-01 | 3.18E-02 | 9.60E-01 | 7.05E-02 |
| Ssbp4_chr8       | 7  | 9  | 11 | 22  | 0.4  | 1.3 | 0.9 | 1.9  | 1.80E-01 | 5.00E-05 | 9.85E-01 | 2.85E-04 |
| Ssna1_chr2       | 14 | 15 | 13 | 21  | 0.1  | 1.1 | 0.7 | 1.6  | 7.71E-01 | 5.00E-05 | 1.00E+00 | 2.85E-04 |
| Ssr4_chrX        | 23 | 22 | 17 | 35  | 0.0  | 1.0 | 1.1 | 2.2  | 7.62E-01 | 5.00E-05 | 1.00E+00 | 2.90E-04 |
| St3gal2_chr8     | 6  | 7  | 13 | 23  | 0.2  | 1.1 | 0.8 | 1.8  | 4.09E-01 | 5.00E-05 | 1.00E+00 | 2.85E-04 |
| St3gal4_chr9     | 11 | 13 | 17 | 33  | 0.2  | 1.2 | 0.9 | 1.9  | 4.86E-01 | 5.00E-05 | 1.00E+00 | 2.85E-04 |
| St3gal5_chr6     | 7  | 10 | 10 | 52  | 0.5  | 1.4 | 2.2 | 4.7  | 7.64E-02 | 4.50E-04 | 9.01E-01 | 2.06E-03 |
| St3gal6_chr16    | 7  | 8  | 9  | 22  | 0.2  | 1.1 | 1.3 | 2.5  | 5.42E-01 | 5.00E-05 | 1.00E+00 | 2.85E-04 |
| St6galnac1_chr11 | 0  | 5  | 0  | 10  | 2.3  | 5.0 | 3.4 | 10.4 | 2.13E-09 | 1.67E-02 | 1.12E-06 | 4.80E-02 |
| St6galnac2_chr11 | 3  | 17 | 6  | 31  | 2.4  | 5.3 | 2.5 | 5.6  | 1.00E-20 | 5.00E-05 | 1.00E-20 | 2.85E-04 |
| Stat1_chr1       | 18 | 23 | 33 | 64  | 0.3  | 1.2 | 1.1 | 2.2  | 4.69E-01 | 3.70E-02 | 9.85E-01 | 8.35E-02 |
| Stk3_chr15       | 4  | 4  | 6  | 10  | -0.1 | 1.1 | 0.7 | 1.7  | 7.87E-01 | 5.00E-05 | 1.00E+00 | 2.85E-04 |
| Stk32c_chr7      | 2  | 3  | 2  | 4   | 0.7  | 1.6 | 0.6 | 1.5  | 1.94E-01 | 3.95E-02 | 9.64E-01 | 9.94E-02 |
| Stra13_chr11     | 13 | 14 | 10 | 16  | 0.0  | 1.0 | 0.7 | 1.6  | 9.20E-01 | 1.50E-04 | 1.00E+00 | 7.89E-04 |
| Stradb_chr1      | 6  | 8  | 9  | 27  | 0.5  | 1.4 | 1.6 | 2.9  | 6.53E-02 | 5.00E-05 | 8.76E-01 | 2.85E-04 |
| Stx11_chr10      | 4  | 5  | 8  | 14  | 0.3  | 1.2 | 0.9 | 1.9  | 4.76E-01 | 2.38E-02 | 1.00E+00 | 5.58E-02 |
| Stx3_chr19       | 2  | 2  | 1  | 2   | 0.1  | 1.1 | 0.6 | 1.5  | 7.51E-01 | 4.65E-02 | 1.00E+00 | 1.05E-01 |
| Stxbp4_chr11     | 1  | 1  | 2  | 3   | 0.3  | 1.2 | 0.7 | 1.6  | 3.59E-01 | 5.00E-05 | 9.98E-01 | 2.85E-04 |
| Sub1_chr15       | 24 | 28 | 21 | 35  | 0.2  | 1.2 | 0.7 | 1.6  | 2.80E-01 | 5.00E-05 | 9.94E-01 | 2.85E-04 |
| Sucnr1_chr3      | 1  | 2  | 2  | 3   | 0.6  | 1.5 | 0.7 | 1.6  | 2.23E-01 | 1.90E-03 | 9.91E-01 | 7.48E-03 |
| Sumo1_chr1       | 64 | 65 | 57 | 88  | 0.0  | 1.0 | 0.6 | 1.5  | 9.08E-01 | 5.00E-05 | 1.00E+00 | 2.85E-04 |
| Suox_chr10       | 5  | 6  | 8  | 13  | 0.3  | 1.2 | 0.7 | 1.7  | 2.63E-01 | 5.00E-05 | 9.94E-01 | 2.85E-04 |
| Suv39h1_chrX     | 7  | 9  | 11 | 18  | 0.4  | 1.3 | 0.7 | 1.6  | 1.16E-01 | 5.00E-05 | 9.45E-01 | 2.85E-04 |
| Suv39h2_chr2     | 1  | 1  | 1  | 3   | -0.1 | 1.1 | 1.3 | 2.5  | 6.46E-01 | 9.30E-03 | 1.00E+00 | 2.96E-02 |
| Suz12_chr11      | 18 | 19 | 29 | 44  | 0.0  | 1.0 | 0.6 | 1.5  | 9.15E-01 | 4.86E-02 | 1.00E+00 | 9.87E-02 |
| Swi5_chr2        | 39 | 41 | 37 | 56  | 0.0  | 1.0 | 0.6 | 1.5  | 8.57E-01 | 1.00E-04 | 1.00E+00 | 5.44E-04 |
| Syce2_chr8       | 1  | 2  | 1  | 5   | 0.6  | 1.5 | 2.2 | 4.7  | 6.15E-01 | 3.21E-03 | 1.00E+00 | 1.20E-02 |
| Synj1_chr16      | 5  | 5  | 8  | 12  | 0.2  | 1.1 | 0.7 | 1.6  | 6.98E-01 | 3.74E-02 | 1.00E+00 | 9.53E-02 |
| Tab3_chrX        | 4  | 4  | 7  | 16  | 0.0  | 1.0 | 1.1 | 2.2  | 8.75E-01 | 5.00E-05 | 1.00E+00 | 2.85E-04 |
| Tac2_chr10       | 0  | 0  | 0  | 2   | 0.0  | 1.0 | 0.6 | 1.5  | 7.44E-01 | 1.00E-04 | 1.00E+00 | 5.50E-04 |
| Tango2_chr16     | 5  | 7  | 8  | 14  | 0.3  | 1.2 | 0.9 | 1.8  | 3.64E-01 | 5.00E-05 | 9.99E-01 | 2.85E-04 |
| Tbc1d31_chr15    | 3  | 3  | 3  | 6   | 0.0  | 1.0 | 0.9 | 1.9  | 9.15E-01 | 4.15E-03 | 1.00E+00 | 1.35E-02 |
| Tbc1d4_chr14     | 4  | 7  | 8  | 13  | 0.8  | 1.7 | 0.7 | 1.6  | 5.76E-04 | 5.00E-05 | 5.94E-02 | 2.85E-04 |
| Tbccd1_chr16     | 4  | 5  | 7  | 12  | 0.2  | 1.1 | 0.8 | 1.7  | 5.53E-01 | 5.00E-05 | 1.00E+00 | 2.85E-04 |
| Tbcel_chr9       | 10 | 11 | 15 | 28  | 0.1  | 1.1 | 0.8 | 1.8  | 5.08E-01 | 5.00E-05 | 1.00E+00 | 2.85E-04 |
| Tbkbp1_chr11     | 3  | 3  | 6  | 10  | 0.2  | 1.2 | 0.6 | 1.6  | 4.35E-01 | 5.00E-05 | 1.00E+00 | 2.85E-04 |
| Tbx21_chr11      | 2  | 4  | 4  | 7   | 0.9  | 1.9 | 0.8 | 1.7  | 6.06E-03 | 5.00E-05 | 3.72E-01 | 2.85E-04 |
| Tcea1_chr1       | 34 | 32 | 43 | 63  | 0.0  | 1.0 | 0.6 | 1.5  | 6.95E-01 | 1.37E-02 | 1.00E+00 | 3.94E-02 |
| Tceb1_chr1       | 21 | 23 | 17 | 28  | 0.1  | 1.1 | 0.7 | 1.6  | 7.36E-01 | 5.00E-05 | 1.00E+00 | 2.85E-04 |
| Tcf19_chr17      | 3  | 3  | 3  | 13  | 0.2  | 1.2 | 2.3 | 4.9  | 6.25E-01 | 5.00E-05 | 1.00E+00 | 2.98E-04 |
| Tctex1d2_chr16   | 5  | 6  | 4  | 7   | 0.3  | 1.2 | 0.8 | 1.8  | 5.25E-01 | 1.00E-04 | 1.00E+00 | 5.44E-04 |
| Tex30_chr1       | 5  | 5  | 4  | 8   | 0.0  | 1.0 | 1.0 | 2.0  | 9.61E-01 | 5.00E-05 | 1.00E+00 | 2.85E-04 |
| Tex9_chr9        | 2  | 2  | 3  | 8   | 0.1  | 1.1 | 1.6 | 3.0  | 6.75E-01 | 5.00E-05 | 1.00E+00 | 2.85E-04 |
| Tfdp2_chr9       | 3  | 3  | 5  | 30  | 0.0  | 1.0 | 2.6 | 5.9  | 8.59E-01 | 1.93E-04 | 1.00E+00 | 9.61E-04 |
| Tff2_chr17       | 0  | 0  | 0  | 8   | 0.0  | 1.0 | 2.9 | 7.5  | 7.56E-01 | 5.00E-05 | 1.00E+00 | 2.85E-04 |
| Tgm2_chr2        | 22 | 28 | 53 | 94  | 0.4  | 1.3 | 0.8 | 1.8  | 5.34E-02 | 5.00E-05 | 8.48E-01 | 2.85E-04 |
| Tgtp1_chr11      | 3  | 2  | 3  | 5   | -0.6 | 1.5 | 0.9 | 1.8  | 9.16E-02 | 5.00E-05 | 9.27E-01 | 2.85E-04 |
| Tgtp2_chr11      | 7  | 7  | 7  | 22  | -0.1 | 1.1 | 1.6 | 3.0  | 8.56E-01 | 5.00E-05 | 1.00E+00 | 2.85E-04 |
| Thg1l_chr11      | 6  | 6  | 8  | 13  | 0.1  | 1.1 | 0.8 | 1.7  | 8.31E-01 | 5.00E-05 | 1.00E+00 | 2.85E-04 |
| Thop1_chr10      | 2  | 2  | 4  | 6   | 0.1  | 1.1 | 0.7 | 1.6  | 7.53E-01 | 5.00E-05 | 1.00E+00 | 2.85E-04 |
| Timeless_chr10   | 3  | 3  | 5  | 9   | 0.2  | 1.1 | 1.0 | 2.0  | 6.61E-01 | 6.45E-03 | 1.00E+00 | 2.06E-02 |
| Timm17a_chr1     | 9  | 11 | 9  | 16  | 0.3  | 1.2 | 0.7 | 1.7  | 4.12E-01 | 5.00E-05 | 1.00E+00 | 2.85E-04 |

|                |     |     |     |     |      |      |     |      |          |          |          |          |
|----------------|-----|-----|-----|-----|------|------|-----|------|----------|----------|----------|----------|
| Timm23_chr14   | 25  | 28  | 29  | 44  | 0.1  | 1.1  | 0.6 | 1.5  | 5.32E-01 | 5.00E-05 | 1.00E+00 | 2.85E-04 |
| Timm8a1_chrX   | 8   | 8   | 7   | 15  | 0.0  | 1.0  | 1.0 | 2.0  | 9.77E-01 | 5.00E-05 | 1.00E+00 | 2.85E-04 |
| Timm8b_chr9    | 14  | 13  | 9   | 21  | -0.1 | 1.1  | 1.2 | 2.3  | 8.26E-01 | 5.25E-03 | 1.00E+00 | 1.81E-02 |
| Tinagl1_chr4   | 11  | 16  | 23  | 40  | 0.5  | 1.5  | 0.8 | 1.7  | 2.62E-02 | 5.00E-05 | 6.96E-01 | 2.85E-04 |
| Tjap1_chr17    | 0   | 3   | 1   | 6   | 1.7  | 3.2  | 2.5 | 5.7  | 3.08E-02 | 5.00E-05 | 8.16E-01 | 3.24E-04 |
| Tkt_chr14      | 25  | 38  | 46  | 80  | 0.6  | 1.5  | 0.8 | 1.7  | 2.86E-03 | 5.00E-05 | 2.54E-01 | 2.85E-04 |
| Tlr7_chrX      | 12  | 11  | 18  | 30  | -0.1 | 1.1  | 0.8 | 1.7  | 6.89E-01 | 5.00E-05 | 1.00E+00 | 2.85E-04 |
| Tmed6_chr8     | 0   | 0   | 0   | 2   | 0.0  | 1.0  | 0.8 | 1.7  | 6.57E-01 | 5.00E-05 | 1.00E+00 | 2.85E-04 |
| Tmem106a_chr11 | 4   | 5   | 6   | 12  | 0.3  | 1.3  | 1.0 | 1.9  | 2.73E-01 | 5.00E-05 | 9.94E-01 | 2.85E-04 |
| Tmem107_chr11  | 1   | 1   | 1   | 2   | 0.0  | 1.0  | 0.9 | 1.9  | 6.53E-01 | 5.00E-05 | 1.00E+00 | 2.85E-04 |
| Tmem121_chr12  | 0   | 1   | 0   | 2   | 0.2  | 1.2  | 1.1 | 2.1  | 3.98E-03 | 5.00E-05 | 3.11E-01 | 2.85E-04 |
| Tmem126a_chr7  | 10  | 11  | 8   | 12  | 0.1  | 1.1  | 0.6 | 1.5  | 7.69E-01 | 1.35E-03 | 1.00E+00 | 5.55E-03 |
| Tmem138_chr19  | 3   | 4   | 4   | 5   | 0.4  | 1.3  | 0.6 | 1.5  | 4.18E-01 | 3.85E-03 | 1.00E+00 | 1.38E-02 |
| Tmem194_chr10  | 4   | 4   | 6   | 12  | 0.2  | 1.2  | 1.0 | 1.9  | 3.90E-01 | 5.00E-05 | 1.00E+00 | 2.85E-04 |
| Tmem215_chr4   | 1   | 2   | 2   | 3   | 0.9  | 1.9  | 0.8 | 1.7  | 6.98E-02 | 7.25E-04 | 8.89E-01 | 3.17E-03 |
| Tmem221_chr8   | 1   | 1   | 1   | 2   | 0.4  | 1.4  | 1.1 | 2.1  | 3.41E-02 | 5.00E-05 | 7.66E-01 | 2.85E-04 |
| Tmem256_chr11  | 16  | 14  | 11  | 38  | -0.2 | 1.1  | 1.7 | 3.3  | 6.73E-01 | 5.00E-05 | 1.00E+00 | 2.85E-04 |
| Tmem258_chr19  | 41  | 44  | 23  | 41  | 0.1  | 1.1  | 0.8 | 1.8  | 7.15E-01 | 5.00E-05 | 1.00E+00 | 2.85E-04 |
| Tmem29_chrX    | 2   | 2   | 2   | 3   | 0.1  | 1.1  | 0.7 | 1.6  | 7.81E-01 | 1.33E-02 | 1.00E+00 | 3.90E-02 |
| Tmem38a_chr8   | 0   | 1   | 1   | 2   | 0.0  | 1.0  | 0.6 | 1.5  | 2.25E-01 | 5.00E-05 | 9.91E-01 | 2.85E-04 |
| Tmem41a_chr16  | 2   | 2   | 2   | 3   | 0.4  | 1.3  | 0.7 | 1.6  | 5.36E-01 | 5.43E-03 | 1.00E+00 | 1.87E-02 |
| Tmem70_chr1    | 9   | 10  | 9   | 15  | 0.1  | 1.1  | 0.7 | 1.6  | 7.08E-01 | 5.00E-05 | 1.00E+00 | 2.85E-04 |
| Tmem8_chr17    | 7   | 8   | 13  | 21  | 0.3  | 1.2  | 0.7 | 1.6  | 2.84E-01 | 5.00E-05 | 9.95E-01 | 2.85E-04 |
| Tmem86b_chr7   | 2   | 3   | 3   | 7   | 0.2  | 1.1  | 1.4 | 2.7  | 6.70E-01 | 5.00E-05 | 1.00E+00 | 2.85E-04 |
| Tmem9_chr1     | 5   | 5   | 7   | 12  | 0.2  | 1.2  | 0.9 | 1.8  | 4.98E-01 | 5.00E-05 | 1.00E+00 | 2.85E-04 |
| Tmem97_chr11   | 3   | 4   | 5   | 8   | 0.3  | 1.3  | 0.7 | 1.7  | 3.89E-01 | 2.00E-04 | 1.00E+00 | 1.02E-03 |
| Tmod1_chr4     | 0   | 1   | 1   | 15  | 0.0  | 1.0  | 3.9 | 14.6 | 6.72E-01 | 5.00E-05 | 1.00E+00 | 2.85E-04 |
| Tmtc3_chr10    | 3   | 3   | 5   | 9   | -0.2 | 1.2  | 0.7 | 1.7  | 4.06E-01 | 5.00E-05 | 1.00E+00 | 2.85E-04 |
| Tmtc4_chr14    | 1   | 2   | 2   | 4   | 0.6  | 1.5  | 0.8 | 1.7  | 1.04E-01 | 5.00E-05 | 9.38E-01 | 2.85E-04 |
| Tmx1_chr12     | 27  | 30  | 34  | 57  | 0.1  | 1.1  | 0.7 | 1.7  | 5.45E-01 | 5.00E-05 | 1.00E+00 | 2.85E-04 |
| Tmx4_chr2      | 6   | 6   | 10  | 17  | 0.0  | 1.0  | 0.8 | 1.7  | 9.27E-01 | 5.00E-05 | 1.00E+00 | 2.85E-04 |
| Tnfsf13_chr11  | 3   | 2   | 3   | 7   | -0.4 | 1.3  | 1.3 | 2.5  | 6.50E-01 | 7.33E-04 | 1.00E+00 | 3.37E-03 |
| Tnni3_chr7     | 1   | 2   | 1   | 2   | 0.7  | 1.6  | 0.7 | 1.6  | 2.48E-01 | 4.50E-04 | 9.92E-01 | 2.12E-03 |
| Tomm40_chr7    | 9   | 11  | 1   | 4   | 0.3  | 1.2  | 1.8 | 3.5  | 3.36E-01 | 1.88E-02 | 9.97E-01 | 5.88E-02 |
| Tomm5_chr4     | 15  | 16  | 12  | 21  | -0.1 | 1.1  | 0.9 | 1.8  | 8.13E-01 | 2.16E-02 | 1.00E+00 | 5.22E-02 |
| Tpcn1_chr5     | 8   | 8   | 19  | 33  | 0.0  | 1.0  | 0.8 | 1.8  | 8.69E-01 | 5.00E-05 | 1.00E+00 | 2.85E-04 |
| Tpi1_chr6      | 29  | 33  | 33  | 50  | 0.2  | 1.1  | 0.6 | 1.5  | 4.03E-01 | 2.00E-04 | 1.00E+00 | 1.02E-03 |
| Tppp3_chr8     | 1   | 1   | 1   | 3   | 0.0  | 1.0  | 1.0 | 2.0  | 9.86E-01 | 5.00E-05 | 1.00E+00 | 2.85E-04 |
| Tpx2_chr2      | 2   | 3   | 2   | 17  | 0.3  | 1.3  | 2.6 | 6.1  | 3.64E-01 | 7.14E-05 | 9.98E-01 | 4.21E-04 |
| Trappc12_chr12 | 6   | 8   | 1   | 3   | 0.4  | 1.3  | 1.7 | 3.2  | 3.16E-01 | 1.37E-02 | 8.64E-01 | 4.35E-02 |
| Trim12a_chr7   | 0   | 11  | 0   | 47  | 3.5  | 11.2 | 5.5 | 46.6 | 1.64E-06 | 1.44E-02 | 4.14E-04 | 4.25E-02 |
| Trim12c_chr7   | 39  | 39  | 11  | 50  | 0.0  | 1.0  | 2.2 | 4.5  | 9.78E-01 | 5.00E-05 | 1.00E+00 | 2.99E-04 |
| Trim30a_chr7   | 33  | 35  | 46  | 76  | 0.1  | 1.1  | 0.7 | 1.6  | 5.75E-01 | 5.00E-05 | 1.00E+00 | 2.85E-04 |
| Trim30b_chr7   | 1   | 4   | 1   | 14  | 1.8  | 3.4  | 3.7 | 13.4 | 5.24E-06 | 5.00E-05 | 1.08E-03 | 2.85E-04 |
| Trim30d_chr7   | 1   | 5   | 1   | 32  | 2.2  | 4.7  | 5.0 | 31.6 | 2.60E-07 | 5.00E-05 | 8.12E-05 | 2.85E-04 |
| Trim34a_chr7   | 7   | 15  | 11  | 36  | 1.1  | 2.1  | 1.7 | 3.2  | 1.80E-05 | 5.00E-05 | 3.03E-03 | 2.85E-04 |
| Trim37_chr11   | 4   | 5   | 8   | 12  | 0.1  | 1.1  | 0.7 | 1.7  | 5.61E-01 | 5.00E-05 | 1.00E+00 | 2.85E-04 |
| Trim59_chr3    | 22  | 28  | 30  | 78  | 0.4  | 1.3  | 1.4 | 2.6  | 9.32E-02 | 5.00E-05 | 8.35E-01 | 2.85E-04 |
| Trmt1_chr8     | 2   | 6   | 2   | 9   | 1.6  | 3.0  | 2.1 | 4.1  | 9.90E-03 | 7.50E-04 | 4.56E-01 | 3.46E-03 |
| Trmt10a_chr3   | 2   | 2   | 2   | 4   | 0.3  | 1.2  | 0.9 | 1.8  | 4.05E-01 | 5.00E-05 | 1.00E+00 | 2.85E-04 |
| Trmt11_chr10   | 4   | 4   | 4   | 7   | 0.0  | 1.0  | 0.6 | 1.5  | 9.82E-01 | 3.00E-04 | 1.00E+00 | 1.47E-03 |
| Trpc6_chr9     | 1   | 1   | 1   | 2   | 0.0  | 1.0  | 0.7 | 1.6  | 9.53E-01 | 2.00E-04 | 1.00E+00 | 1.02E-03 |
| Tspan8_chr10   | 0   | 1   | 0   | 14  | 0.0  | 1.0  | 3.6 | 11.9 | 7.68E-01 | 1.55E-03 | 1.00E+00 | 6.22E-03 |
| Ttc39c_chr18   | 1   | 1   | 1   | 2   | 0.0  | 1.0  | 0.6 | 1.6  | 7.94E-01 | 2.70E-03 | 1.00E+00 | 1.02E-02 |
| Ttll12_chr15   | 3   | 4   | 8   | 22  | 0.6  | 1.5  | 1.5 | 2.8  | 3.59E-02 | 5.00E-05 | 7.71E-01 | 2.85E-04 |
| Tuba1b_chr15   | 61  | 95  | 100 | 282 | 0.6  | 1.5  | 1.5 | 2.8  | 2.71E-03 | 5.00E-05 | 1.73E-01 | 2.85E-04 |
| Tubb3_chr8     | 0   | 0   | 0   | 2   | 0.0  | 1.0  | 0.7 | 1.6  | 2.97E-01 | 5.00E-05 | 1.00E+00 | 2.85E-04 |
| Tubb5_chr17    | 71  | 103 | 150 | 228 | 0.5  | 1.4  | 0.6 | 1.5  | 1.71E-02 | 7.00E-04 | 5.91E-01 | 3.13E-03 |
| Tubd1_chr11    | 4   | 4   | 5   | 9   | 0.0  | 1.0  | 0.7 | 1.6  | 9.19E-01 | 2.50E-04 | 1.00E+00 | 1.28E-03 |
| Tube1_chr10    | 1   | 1   | 1   | 2   | 0.0  | 1.0  | 0.6 | 1.6  | 9.07E-01 | 1.45E-03 | 1.00E+00 | 5.90E-03 |
| Tuft1_chr3     | 1   | 1   | 2   | 3   | 0.2  | 1.1  | 0.7 | 1.6  | 7.23E-01 | 2.00E-04 | 1.00E+00 | 1.02E-03 |
| Txndc5_chr13   | 45  | 59  | 73  | 146 | 0.4  | 1.3  | 1.0 | 2.0  | 5.75E-02 | 5.00E-05 | 8.68E-01 | 2.85E-04 |
| Txn11_chr18    | 12  | 13  | 14  | 29  | 0.1  | 1.1  | 1.0 | 2.0  | 7.05E-01 | 5.00E-05 | 1.00E+00 | 2.85E-04 |
| Txnrd2_chr16   | 5   | 6   | 8   | 28  | 0.5  | 1.4  | 1.8 | 3.5  | 3.59E-01 | 5.00E-05 | 9.98E-01 | 2.85E-04 |
| Tyrobp_chr7    | 109 | 95  | 69  | 128 | -0.2 | 1.1  | 0.9 | 1.8  | 3.63E-01 | 5.00E-05 | 9.99E-01 | 2.85E-04 |
| U2af1_chr17    | 17  | 20  | 15  | 23  | 0.3  | 1.2  | 0.7 | 1.6  | 4.23E-01 | 4.99E-02 | 9.98E-01 | 9.99E-02 |
| Uba7_chr9      | 34  | 38  | 59  | 91  | 0.2  | 1.1  | 0.6 | 1.6  | 4.17E-01 | 5.00E-05 | 1.00E+00 | 2.85E-04 |
| Ubd_chr17      | 4   | 4   | 2   | 6   | 0.0  | 1.0  | 1.3 | 2.5  | 9.88E-01 | 5.00E-05 | 1.00E+00 | 2.85E-04 |
| Ube2b_chr11    | 30  | 35  | 31  | 51  | 0.2  | 1.2  | 0.7 | 1.6  | 3.27E-01 | 5.00E-05 | 9.98E-01 | 2.85E-04 |
| Ube2e3_chr2    | 14  | 15  | 16  | 27  | 0.1  | 1.1  | 0.7 | 1.7  | 6.91E-01 | 5.00E-05 | 1.00E+00 | 2.85E-04 |
| Ubiad1_chr4    | 3   | 7   | 6   | 10  | 1.0  | 2.0  | 0.7 | 1.7  | 2.63E-04 | 5.00E-05 | 4.78E-02 | 2.85E-04 |
| Uchl5_chr1     | 6   | 7   | 7   | 11  | 0.2  | 1.2  | 0.8 | 1.7  | 5.48E-01 | 4.33E-03 | 1.00E+00 | 1.40E-02 |
| Uck2_chr1      | 7   | 8   | 16  | 25  | 0.0  | 1.0  | 0.6 | 1.6  | 9.09E-01 | 5.00E-05 | 1.00E+00 | 2.85E-04 |
| Ucp2_chr7      | 75  | 115 | 141 | 236 | 0.6  | 1.5  | 0.7 | 1.7  | 1.22E-02 | 2.00E-04 | 5.10E-01 | 1.02E-03 |
| Uhrf1_chr17    | 3   | 4   | 6   | 32  | 0.6  | 1.5  | 2.5 | 5.5  | 1.86E-01 | 5.00E-05 | 9.56E-01 | 2.92E-04 |
| Ulp1_chr10     | 2   | 2   | 3   | 5   | 0.0  | 1.0  | 0.7 | 1.6  | 9.17E-01 | 1.50E-04 | 1.00E+00 | 7.89E-04 |
| Ulk1_chr5      | 7   | 7   | 16  | 29  | 0.1  | 1.1  | 0.9 | 1.8  | 5.69E-01 | 5.00E-05 | 1.00E+00 | 2.85E-04 |
| Unc5cl_chr17   | 2   | 2   | 3   | 4   | 0.2  | 1.1  | 0.6 | 1.5  | 6.13E-01 | 5.00E-04 | 1.00E+00 | 2.32E-03 |
| Ung_chr5       | 2   | 2   | 4   | 6   | 0.2  | 1.2  | 0.7 | 1.7  | 6.47E-01 | 2.38E-04 | 1.00E+00 | 1.21E-03 |
| Uqcc2_chr17    | 14  | 15  | 10  | 15  | 0.1  | 1.1  | 0.6 | 1.5  | 6.99E-01 | 1.85E-03 | 1.00E+00 | 7.31E-03 |
| Uqcr10_chr11   | 29  | 29  | 16  | 31  | 0.0  | 1.0  | 0.9 | 1.9  | 9.49E-01 | 5.00E-05 | 1.00E+00 | 2.85E-04 |



|                    |     |     |    |     |      |     |     |      |          |          |          |          |
|--------------------|-----|-----|----|-----|------|-----|-----|------|----------|----------|----------|----------|
| Uqcr11_chr10       | 21  | 21  | 13 | 23  | 0.0  | 1.0 | 0.8 | 1.8  | 9.06E-01 | 5.00E-05 | 1.00E+00 | 2.85E-04 |
| Uqcrh_chr4         | 113 | 115 | 67 | 109 | 0.0  | 1.0 | 0.7 | 1.6  | 9.22E-01 | 5.00E-05 | 1.00E+00 | 2.85E-04 |
| Uqcrq_chr11        | 21  | 20  | 15 | 29  | -0.1 | 1.0 | 0.9 | 1.9  | 8.31E-01 | 5.00E-05 | 1.00E+00 | 2.85E-04 |
| Usmg5_chr19        | 33  | 31  | 16 | 52  | -0.1 | 1.1 | 1.7 | 3.2  | 8.10E-01 | 5.00E-05 | 1.00E+00 | 2.85E-04 |
| Usp1_chr4          | 19  | 19  | 31 | 55  | 0.0  | 1.0 | 0.8 | 1.8  | 9.21E-01 | 5.00E-05 | 1.00E+00 | 2.85E-04 |
| Usp14_chr18        | 9   | 10  | 12 | 21  | 0.1  | 1.1 | 0.7 | 1.7  | 6.24E-01 | 2.25E-04 | 1.00E+00 | 1.15E-03 |
| Usp15_chr10        | 24  | 23  | 39 | 97  | 0.0  | 1.0 | 1.3 | 2.5  | 9.24E-01 | 5.00E-05 | 1.00E+00 | 2.85E-04 |
| Usp18_chr6         | 3   | 4   | 3  | 20  | 0.7  | 1.6 | 2.6 | 5.9  | 6.42E-02 | 5.00E-05 | 8.76E-01 | 2.85E-04 |
| Usp25_chr16        | 24  | 29  | 50 | 83  | 0.3  | 1.2 | 0.7 | 1.7  | 1.96E-01 | 5.00E-05 | 9.87E-01 | 2.85E-04 |
| Usp32_chr11        | 9   | 9   | 17 | 45  | 0.0  | 1.0 | 1.4 | 2.7  | 9.99E-01 | 5.00E-05 | 1.00E+00 | 2.85E-04 |
| Usp49_chr17        | 2   | 2   | 3  | 9   | 0.1  | 1.1 | 1.5 | 2.8  | 6.96E-01 | 5.00E-05 | 1.00E+00 | 2.85E-04 |
| Uxt_chrX           | 5   | 5   | 3  | 5   | 0.1  | 1.0 | 0.7 | 1.6  | 8.83E-01 | 2.04E-02 | 1.00E+00 | 5.69E-02 |
| Vamp8_chr6         | 42  | 45  | 31 | 56  | 0.1  | 1.1 | 0.9 | 1.8  | 7.25E-01 | 5.00E-05 | 1.00E+00 | 2.85E-04 |
| Vangl1_chr3        | 1   | 1   | 2  | 4   | 0.3  | 1.3 | 1.0 | 2.0  | 3.17E-01 | 5.00E-05 | 1.00E+00 | 2.85E-04 |
| Vbp1_chrX          | 35  | 38  | 39 | 65  | 0.1  | 1.1 | 0.7 | 1.7  | 6.61E-01 | 5.00E-05 | 1.00E+00 | 2.85E-04 |
| Vill_chr9          | 1   | 1   | 1  | 2   | 0.0  | 1.0 | 1.2 | 2.3  | 3.93E-01 | 5.00E-05 | 9.98E-01 | 2.85E-04 |
| Vkorc111_chr5      | 7   | 7   | 8  | 13  | -0.1 | 1.1 | 0.7 | 1.6  | 6.99E-01 | 2.39E-02 | 1.00E+00 | 5.79E-02 |
| Vnn3_chr10         | 1   | 1   | 2  | 3   | 0.0  | 1.0 | 1.0 | 2.0  | 9.94E-01 | 5.00E-05 | 1.00E+00 | 2.85E-04 |
| Vps35_chr8         | 34  | 32  | 55 | 90  | -0.1 | 1.1 | 0.7 | 1.6  | 7.03E-01 | 1.00E-04 | 1.00E+00 | 5.44E-04 |
| Vrk2_chr11         | 11  | 12  | 14 | 25  | 0.1  | 1.1 | 0.9 | 1.8  | 7.67E-01 | 5.00E-05 | 1.00E+00 | 2.85E-04 |
| Vwf_chr6           | 2   | 3   | 6  | 13  | 0.7  | 1.6 | 1.1 | 2.1  | 1.11E-02 | 5.00E-05 | 4.89E-01 | 2.85E-04 |
| Wapal_chr14        | 25  | 25  | 49 | 79  | 0.0  | 1.0 | 0.7 | 1.6  | 8.66E-01 | 5.00E-05 | 1.00E+00 | 2.85E-04 |
| Wbp5_chrX          | 20  | 20  | 15 | 29  | 0.0  | 1.0 | 0.9 | 1.9  | 9.43E-01 | 5.00E-05 | 1.00E+00 | 2.85E-04 |
| Wdr26_chr1         | 35  | 35  | 58 | 91  | 0.0  | 1.0 | 0.7 | 1.6  | 9.87E-01 | 5.50E-04 | 1.00E+00 | 2.52E-03 |
| Wdr60_chr12        | 1   | 1   | 2  | 4   | 0.2  | 1.1 | 0.8 | 1.8  | 6.88E-01 | 5.00E-05 | 1.00E+00 | 2.85E-04 |
| Wdr76_chr2         | 5   | 5   | 8  | 14  | 0.1  | 1.1 | 0.9 | 1.9  | 6.38E-01 | 5.00E-05 | 1.00E+00 | 2.85E-04 |
| Wdr90_chr17        | 2   | 3   | 5  | 11  | 0.1  | 1.1 | 1.1 | 2.1  | 7.73E-01 | 5.00E-05 | 1.00E+00 | 2.85E-04 |
| Wee1_chr7          | 3   | 3   | 5  | 9   | 0.0  | 1.0 | 1.0 | 2.0  | 9.91E-01 | 5.00E-05 | 1.00E+00 | 2.85E-04 |
| Whrn_chr4          | 1   | 5   | 1  | 7   | 2.2  | 4.5 | 2.3 | 4.9  | 8.93E-08 | 5.00E-05 | 4.02E-05 | 2.61E-04 |
| Whsc1_chr5         | 4   | 4   | 7  | 15  | 0.1  | 1.0 | 1.1 | 2.1  | 5.85E-01 | 2.98E-03 | 1.00E+00 | 9.92E-03 |
| Wnk4_chr11         | 1   | 1   | 1  | 2   | 0.0  | 1.0 | 0.9 | 1.9  | 5.41E-01 | 5.00E-05 | 1.00E+00 | 2.85E-04 |
| Xaf1_chr11         | 2   | 3   | 2  | 6   | 0.3  | 1.3 | 1.3 | 2.4  | 3.55E-01 | 5.00E-05 | 9.98E-01 | 2.85E-04 |
| Xcl1_chr1          | 2   | 3   | 1  | 3   | 0.2  | 1.1 | 1.2 | 2.3  | 7.61E-01 | 2.00E-04 | 1.00E+00 | 1.02E-03 |
| Xpnp1_chr19        | 9   | 11  | 19 | 35  | 0.3  | 1.2 | 0.9 | 1.9  | 2.07E-01 | 5.00E-05 | 9.88E-01 | 2.85E-04 |
| Xrcc6_chr15        | 10  | 12  | 13 | 20  | 0.3  | 1.2 | 0.6 | 1.5  | 3.08E-01 | 5.00E-05 | 9.97E-01 | 2.85E-04 |
| Yars_chr4          | 8   | 11  | 15 | 24  | 0.5  | 1.5 | 0.7 | 1.6  | 2.69E-02 | 5.00E-05 | 7.02E-01 | 2.85E-04 |
| Ydjc_chr16         | 1   | 1   | 2  | 3   | 0.3  | 1.3 | 0.8 | 1.8  | 5.30E-01 | 5.50E-04 | 1.00E+00 | 2.52E-03 |
| Yipf4_chr17        | 16  | 20  | 19 | 35  | 0.3  | 1.2 | 0.9 | 1.8  | 1.71E-01 | 5.00E-05 | 9.80E-01 | 2.85E-04 |
| Yod1_chr1          | 5   | 4   | 8  | 16  | -0.3 | 1.2 | 1.0 | 2.0  | 5.03E-01 | 4.50E-04 | 1.00E+00 | 2.12E-03 |
| Ypel5_chr17        | 15  | 17  | 15 | 23  | 0.2  | 1.1 | 0.6 | 1.5  | 3.60E-01 | 5.00E-05 | 9.98E-01 | 2.85E-04 |
| Zak_chr2           | 2   | 2   | 3  | 4   | -0.2 | 1.1 | 0.8 | 1.8  | 7.40E-01 | 1.34E-02 | 1.00E+00 | 3.70E-02 |
| Zbp1_chr2          | 7   | 7   | 7  | 25  | 0.2  | 1.1 | 1.9 | 3.9  | 6.74E-01 | 5.00E-05 | 1.00E+00 | 2.85E-04 |
| Zbtb45_chr7        | 2   | 3   | 6  | 9   | 0.5  | 1.4 | 0.6 | 1.6  | 1.68E-01 | 5.00E-05 | 9.80E-01 | 2.85E-04 |
| Zcchc3_chr2        | 1   | 2   | 2  | 3   | 0.4  | 1.3 | 0.9 | 1.9  | 3.36E-01 | 5.00E-05 | 9.98E-01 | 2.85E-04 |
| Zcrb1_chr15        | 10  | 11  | 8  | 12  | 0.1  | 1.1 | 0.6 | 1.5  | 7.51E-01 | 2.50E-04 | 1.00E+00 | 1.25E-03 |
| Zdhhc14_chr17      | 3   | 3   | 6  | 9   | 0.2  | 1.2 | 0.6 | 1.6  | 5.28E-01 | 5.00E-05 | 1.00E+00 | 2.85E-04 |
| Zdhhc24_chr19      | 4   | 5   | 4  | 6   | 0.2  | 1.2 | 0.6 | 1.5  | 5.66E-01 | 4.25E-02 | 1.00E+00 | 1.03E-01 |
| Zfand6_chr7        | 39  | 43  | 39 | 65  | 0.1  | 1.1 | 0.7 | 1.7  | 4.88E-01 | 5.00E-05 | 1.00E+00 | 2.85E-04 |
| Zfp101_chr17       | 5   | 5   | 6  | 10  | -0.1 | 1.1 | 0.7 | 1.7  | 7.43E-01 | 5.00E-05 | 1.00E+00 | 2.85E-04 |
| Zfp367_chr13       | 8   | 7   | 11 | 25  | -0.1 | 1.1 | 1.2 | 2.3  | 5.42E-01 | 5.00E-05 | 1.00E+00 | 2.85E-04 |
| Zfp39_chr11        | 3   | 4   | 6  | 9   | 0.1  | 1.1 | 0.7 | 1.6  | 6.91E-01 | 5.00E-05 | 1.00E+00 | 2.85E-04 |
| Zfp534_chr4        | 0   | 4   | 0  | 6   | 1.9  | 3.8 | 2.6 | 6.0  | 3.95E-14 | 5.00E-05 | 9.74E-11 | 2.85E-04 |
| Zfp808_chr13       | 4   | 3   | 5  | 16  | -0.4 | 1.4 | 1.8 | 3.4  | 1.44E-01 | 5.00E-05 | 9.67E-01 | 2.85E-04 |
| Zfp933_chr4        | 4   | 5   | 5  | 9   | 0.3  | 1.2 | 0.7 | 1.6  | 2.50E-01 | 5.00E-05 | 9.92E-01 | 2.85E-04 |
| Zfp934_chr13       | 2   | 1   | 2  | 4   | -0.4 | 1.3 | 1.3 | 2.4  | 4.49E-01 | 5.00E-05 | 1.00E+00 | 2.85E-04 |
| Zfp947_chr17       | 1   | 1   | 1  | 2   | -0.1 | 1.1 | 0.7 | 1.6  | 8.46E-01 | 7.50E-04 | 1.00E+00 | 3.33E-03 |
| Zfp951_chr5        | 3   | 2   | 3  | 6   | -0.6 | 1.5 | 1.0 | 2.0  | 1.19E-01 | 5.00E-05 | 9.48E-01 | 2.85E-04 |
| Zgrf1_chr3         | 1   | 1   | 3  | 6   | 0.0  | 1.0 | 1.2 | 2.3  | 9.54E-01 | 5.00E-05 | 1.00E+00 | 2.85E-04 |
| Zmynd19_chr2       | 6   | 6   | 9  | 14  | 0.1  | 1.1 | 0.7 | 1.6  | 7.08E-01 | 5.00E-05 | 1.00E+00 | 2.85E-04 |
| Znhit3_chr11       | 5   | 4   | 4  | 8   | -0.3 | 1.2 | 1.0 | 2.0  | 6.60E-01 | 1.79E-02 | 1.00E+00 | 5.09E-02 |
| Zranb3_chr1        | 2   | 2   | 3  | 5   | 0.3  | 1.2 | 0.9 | 1.9  | 4.58E-01 | 5.00E-05 | 1.00E+00 | 2.85E-04 |
| Zwint_chr10        | 9   | 9   | 13 | 22  | 0.0  | 1.0 | 0.8 | 1.7  | 9.30E-01 | 5.00E-05 | 1.00E+00 | 2.85E-04 |
| 2210010C04Rik_chr6 | 2   | 1   | 2  | 61  | -1.1 | 2.2 | 5.3 | 40.3 | 3.13E-02 | 5.00E-05 | 6.37E-01 | 2.85E-04 |
| Cd300e_chr11       | 4   | 4   | 6  | 9   | 0.2  | 1.1 | 0.6 | 1.5  | 6.16E-01 | 1.50E-04 | 1.00E+00 | 7.89E-04 |
| Cel_chr2           | 3   | 1   | 4  | 65  | -1.4 | 2.6 | 4.1 | 16.6 | 1.64E-02 | 5.00E-05 | 4.81E-01 | 2.85E-04 |
| Cela1_chr15        | 13  | 7   | 11 | 160 | -0.9 | 1.8 | 3.9 | 14.5 | 1.88E-02 | 5.00E-05 | 5.03E-01 | 2.85E-04 |
| Cela3b_chr4        | 3   | 1   | 2  | 63  | -1.4 | 2.7 | 4.8 | 27.3 | 6.57E-02 | 5.00E-05 | 7.70E-01 | 2.85E-04 |
| Clips_chr17        | 7   | 2   | 4  | 104 | -2.1 | 4.4 | 4.6 | 24.2 | 5.75E-03 | 5.00E-05 | 2.70E-01 | 2.85E-04 |
| Cpa1_chr6          | 3   | 1   | 3  | 68  | -1.2 | 2.3 | 4.7 | 25.5 | 3.52E-02 | 5.00E-05 | 6.58E-01 | 2.85E-04 |
| Cpa2_chr6          | 1   | 0   | 1  | 17  | 0.0  | 1.0 | 4.1 | 17.3 | 1.87E-01 | 5.00E-05 | 9.45E-01 | 2.85E-04 |
| Cpb1_chr3          | 4   | 1   | 4  | 112 | -1.9 | 3.6 | 4.7 | 26.9 | 1.97E-03 | 5.00E-05 | 1.38E-01 | 2.85E-04 |
| Ctrb1_chr8         | 8   | 3   | 6  | 258 | -1.3 | 2.4 | 5.4 | 42.7 | 1.46E-02 | 5.00E-05 | 4.43E-01 | 2.85E-04 |
| Ctrl_chr8          | 3   | 1   | 2  | 51  | -1.6 | 3.0 | 4.4 | 21.4 | 2.06E-02 | 5.00E-05 | 5.28E-01 | 2.85E-04 |
| Cyp4f37_chr17      | 1   | 2   | 1  | 4   | 0.6  | 1.6 | 1.6 | 3.1  | 5.04E-03 | 5.00E-05 | 3.50E-01 | 2.85E-04 |
| Gm8221_chr15       | 0   | 3   | 0  | 3   | 1.4  | 2.6 | 1.8 | 3.4  | 1.00E-20 | 5.00E-05 | 1.00E-20 | 2.82E-04 |
| Gp2_chr7           | 1   | 1   | 2  | 24  | -0.6 | 1.5 | 3.6 | 12.5 | 7.69E-02 | 5.00E-05 | 9.03E-01 | 2.85E-04 |
| Klk1_chr7          | 2   | 1   | 1  | 24  | -0.9 | 1.8 | 4.1 | 17.7 | 1.91E-01 | 5.00E-05 | 9.86E-01 | 2.85E-04 |
| Klre1_chr6         | 1   | 2   | 1  | 3   | 0.6  | 1.5 | 1.5 | 2.8  | 2.76E-01 | 5.00E-05 | 9.94E-01 | 2.85E-04 |
| Pnlip_chr19        | 8   | 3   | 8  | 213 | -1.4 | 2.7 | 4.8 | 27.9 | 2.32E-03 | 5.00E-05 | 1.54E-01 | 2.85E-04 |
| Pnliprp1_chr19     | 3   | 1   | 2  | 65  | -1.3 | 2.5 | 4.8 | 27.2 | 2.82E-02 | 5.00E-05 | 6.10E-01 | 2.85E-04 |
| Pnliprp2_chr19     | 0   | 0   | 0  | 11  | 0.0  | 1.0 | 3.4 | 10.9 | 1.96E-01 | 5.00E-05 | 9.48E-01 | 2.85E-04 |

|              |   |   |   |     |      |     |     |      |          |          |          |          |
|--------------|---|---|---|-----|------|-----|-----|------|----------|----------|----------|----------|
| Prss2_chr6   | 8 | 3 | 4 | 107 | -1.6 | 3.1 | 4.6 | 24.7 | 4.50E-03 | 5.00E-05 | 2.50E-01 | 2.85E-04 |
| Reg1_chr6    | 2 | 1 | 1 | 88  | -0.8 | 1.8 | 6.5 | 87.7 | 2.92E-01 | 5.00E-05 | 9.83E-01 | 2.85E-04 |
| Rnase1_chr14 | 3 | 1 | 2 | 41  | -1.4 | 2.6 | 4.7 | 26.1 | 6.54E-02 | 5.00E-05 | 7.70E-01 | 2.85E-04 |
| Spink3_chr18 | 1 | 0 | 0 | 16  | 0.0  | 1.0 | 4.0 | 15.9 | 2.52E-01 | 5.00E-05 | 9.92E-01 | 2.85E-04 |
| Sycn_chr7    | 4 | 1 | 1 | 29  | -1.7 | 3.1 | 4.3 | 20.0 | 4.64E-02 | 5.00E-05 | 7.18E-01 | 2.85E-04 |
| Try4_chr6    | 0 | 0 | 0 | 58  | 0.0  | 1.0 | 5.8 | 57.5 | 1.65E-01 | 5.00E-05 | 1.00E+00 | 2.85E-04 |
| Try5_chr6    | 1 | 1 | 1 | 62  | -0.1 | 1.1 | 5.9 | 61.8 | 8.11E-01 | 5.00E-05 | 1.00E+00 | 2.85E-04 |
| Zg16_chr7    | 2 | 1 | 1 | 36  | -0.8 | 1.8 | 5.2 | 35.9 | 2.91E-01 | 5.00E-05 | 9.82E-01 | 2.85E-04 |

**Supplemental Table 2: Transcripts down-regulated in spleens from Triple KO mice compared to spleens from WT mice**

Shown are a total of 991 transcripts that were down-regulated in Triple KO mice spleens as compared to WT spleens in the RNA-Seq dataset. The symbols and abbreviations used are the same as described in the legend to Supplemental Table 1.

| GeneChrom           | WT_v1 | DoubleKO | WT_v2 | TripleKO | floorLog2FC<br>DoubleKO vsWT | Fold Change<br>DoubleKO vs WT | floorLog2FC<br>TripleKO vsWT | Fold Change<br>TripleKO vs WT | p_value DoubleKO<br>vsWT | p_value TripleKO<br>vsWT | q_value DoubleKO<br>vsWT | q_value TripleKO<br>vsWT |
|---------------------|-------|----------|-------|----------|------------------------------|-------------------------------|------------------------------|-------------------------------|--------------------------|--------------------------|--------------------------|--------------------------|
| Akr1c12_chr13       | 2     | 1        | 2     | 1        | -0.4                         | 1.3                           | -0.7                         | 1.6                           | 4.64E-01                 | 3.25E-03                 | 1.00E+00                 | 1.19E-02                 |
| Alox5_chr6          | 17    | 1        | 37    | 6        | -4.1                         | 16.9                          | -2.6                         | 5.9                           | 1.00E-20                 | 5.00E-05                 | 1.00E-20                 | 2.85E-04                 |
| Bmper_chr9          | 1     | 1        | 2     | 1        | -0.2                         | 1.2                           | -1.0                         | 2.0                           | 3.93E-01                 | 5.00E-05                 | 1.00E+00                 | 2.85E-04                 |
| Ccdc122_chr14       | 4     | 3        | 5     | 2        | -0.7                         | 1.6                           | -1.2                         | 2.3                           | 8.48E-02                 | 5.00E-05                 | 8.21E-01                 | 2.85E-04                 |
| Cyp26b1_chr6        | 1     | 0        | 2     | 1        | 0.0                          | 1.0                           | -0.7                         | 1.7                           | 2.96E-02                 | 5.00E-05                 | 7.33E-01                 | 2.85E-04                 |
| Lox_chr18           | 2     | 2        | 3     | 2        | -0.1                         | 1.1                           | -0.8                         | 1.8                           | 7.47E-01                 | 5.00E-05                 | 1.00E+00                 | 2.85E-04                 |
| Lpl_chr8            | 12    | 12       | 18    | 9        | 0.0                          | 1.0                           | -1.1                         | 2.1                           | 8.88E-01                 | 5.00E-05                 | 1.00E+00                 | 2.85E-04                 |
| Rgs4_chr1           | 2     | 1        | 2     | 1        | -0.8                         | 1.7                           | -1.2                         | 2.4                           | 9.38E-04                 | 5.00E-05                 | 1.17E-01                 | 2.85E-04                 |
| Serpine2_chr1       | 5     | 5        | 8     | 5        | 0.0                          | 1.0                           | -0.6                         | 1.5                           | 9.13E-01                 | 5.00E-05                 | 1.00E+00                 | 2.85E-04                 |
| Zbtb16_chr9         | 1     | 1        | 3     | 2        | -0.5                         | 1.4                           | -1.0                         | 2.0                           | 4.68E-03                 | 5.00E-05                 | 2.52E-01                 | 2.85E-04                 |
| 1110059E24Rik_chr19 | 60    | 52       | 55    | 24       | -0.2                         | 1.2                           | -1.2                         | 2.3                           | 3.01E-01                 | 5.00E-05                 | 9.85E-01                 | 2.85E-04                 |
| 1700009J07Rik_chr10 | 1     | 0        | 2     | 1        | -0.1                         | 1.1                           | -0.8                         | 1.7                           | 3.66E-02                 | 2.50E-04                 | 7.60E-01                 | 1.24E-03                 |
| 1700019G17Rik_chr6  | 2     | 2        | 3     | 2        | 0.3                          | 1.3                           | -0.7                         | 1.6                           | 4.19E-01                 | 8.88E-04                 | 1.00E+00                 | 3.07E-03                 |
| 1700021K19Rik_chr16 | 27    | 32       | 65    | 39       | 0.2                          | 1.2                           | -0.7                         | 1.7                           | 3.33E-01                 | 5.00E-05                 | 9.98E-01                 | 2.85E-04                 |
| 1810046K07Rik_chr9  | 2     | 1        | 2     | 1        | -0.3                         | 1.2                           | -1.1                         | 2.2                           | 5.45E-01                 | 5.00E-05                 | 1.00E+00                 | 2.85E-04                 |
| 2410089E03Rik_chr15 | 3     | 3        | 6     | 4        | -0.1                         | 1.1                           | -0.6                         | 1.6                           | 6.60E-01                 | 5.00E-05                 | 1.00E+00                 | 2.85E-04                 |
| 2410131K14Rik_chr5  | 4     | 4        | 8     | 5        | 0.2                          | 1.1                           | -0.6                         | 1.6                           | 6.05E-01                 | 1.00E-04                 | 1.00E+00                 | 5.44E-04                 |
| 2610002J02Rik_chr4  | 6     | 7        | 9     | 5        | 0.1                          | 1.1                           | -0.7                         | 1.6                           | 7.30E-01                 | 1.08E-02                 | 1.00E+00                 | 3.23E-02                 |
| 2610034B18Rik_chr7  | 2     | 2        | 4     | 3        | -0.2                         | 1.1                           | -0.7                         | 1.6                           | 6.49E-01                 | 3.50E-04                 | 1.00E+00                 | 1.69E-03                 |
| 2610035D17Rik_chr11 | 6     | 3        | 8     | 2        | -1.3                         | 2.4                           | -1.7                         | 3.4                           | 6.99E-04                 | 5.00E-05                 | 6.77E-02                 | 2.82E-04                 |
| 2900052N01Rik_chr9  | 16    | 11       | 17    | 6        | -0.6                         | 1.5                           | -1.4                         | 2.7                           | 1.56E-02                 | 5.00E-05                 | 4.66E-01                 | 2.82E-04                 |
| 3830403N18Rik_chrX  | 3     | 1        | 2     | 0        | -1.5                         | 2.8                           | -1.0                         | 1.9                           | 1.74E-04                 | 5.00E-05                 | 3.38E-02                 | 2.85E-04                 |
| 4930481A15Rik_chr19 | 4     | 1        | 5     | 1        | -1.8                         | 3.6                           | -2.3                         | 4.9                           | 2.33E-01                 | 4.45E-03                 | 9.83E-01                 | 1.45E-02                 |
| 4930523C07Rik_chr1  | 31    | 29       | 18    | 6        | -0.2                         | 1.2                           | -1.6                         | 3.0                           | 5.23E-01                 | 2.15E-03                 | 1.00E+00                 | 9.41E-03                 |
| 4932438A13Rik_chr3  | 15    | 12       | 29    | 19       | -0.3                         | 1.3                           | -0.6                         | 1.5                           | 1.39E-01                 | 2.50E-04                 | 8.88E-01                 | 1.25E-03                 |
| 4933439K11Rik_chr1  | 1     | 1        | 2     | 1        | -0.2                         | 1.1                           | -1.2                         | 2.3                           | 7.57E-01                 | 3.50E-03                 | 1.00E+00                 | 1.26E-02                 |
| 5430435G22Rik_chr1  | 8     | 4        | 10    | 5        | -1.1                         | 2.1                           | -0.9                         | 1.9                           | 3.00E-04                 | 5.00E-05                 | 5.34E-02                 | 2.85E-04                 |
| 6330403A02Rik_chr1  | 1     | 1        | 2     | 1        | 0.0                          | 1.0                           | -0.6                         | 1.5                           | 6.29E-01                 | 5.00E-05                 | 1.00E+00                 | 2.85E-04                 |
| 9030624G23Rik_chr12 | 1     | 1        | 2     | 1        | -0.2                         | 1.2                           | -0.6                         | 1.6                           | 3.87E-01                 | 3.45E-03                 | 1.00E+00                 | 1.26E-02                 |
| 9430020K01Rik_chr18 | 4     | 3        | 9     | 6        | -0.1                         | 1.1                           | -0.6                         | 1.5                           | 5.77E-01                 | 5.00E-05                 | 1.00E+00                 | 2.85E-04                 |
| 9930014A18Rik_chr15 | 1     | 1        | 2     | 1        | 0.0                          | 1.0                           | -0.8                         | 1.8                           | 8.34E-01                 | 6.55E-03                 | 1.00E+00                 | 2.17E-02                 |
| A530099J19Rik_chr13 | 9     | 4        | 13    | 5        | -1.3                         | 2.5                           | -1.5                         | 2.9                           | 3.03E-06                 | 5.00E-05                 | 6.74E-04                 | 2.85E-04                 |
| Abca5_chr11         | 1     | 1        | 2     | 1        | -0.1                         | 1.1                           | -1.0                         | 2.0                           | 6.87E-01                 | 5.00E-05                 | 1.00E+00                 | 2.85E-04                 |
| Abca8a_chr11        | 5     | 4        | 8     | 4        | -0.3                         | 1.2                           | -1.1                         | 2.1                           | 2.29E-01                 | 5.00E-05                 | 9.91E-01                 | 2.85E-04                 |
| Abca8b_chr11        | 1     | 1        | 2     | 1        | -0.1                         | 1.0                           | -1.0                         | 2.0                           | 3.80E-01                 | 5.00E-05                 | 1.00E+00                 | 2.85E-04                 |
| Abi3bp_chr16        | 4     | 4        | 5     | 2        | -0.2                         | 1.1                           | -1.5                         | 2.8                           | 6.24E-01                 | 5.00E-05                 | 1.00E+00                 | 3.08E-04                 |
| Ablim1_chr19        | 40    | 46       | 72    | 40       | 0.2                          | 1.2                           | -0.9                         | 1.8                           | 5.17E-01                 | 3.03E-03                 | 1.00E+00                 | 1.12E-02                 |
| Acad10_chr5         | 2     | 2        | 5     | 3        | 0.1                          | 1.1                           | -0.8                         | 1.7                           | 7.09E-01                 | 5.00E-05                 | 1.00E+00                 | 2.85E-04                 |
| Ace_chr11           | 5     | 4        | 12    | 7        | -0.4                         | 1.4                           | -0.7                         | 1.7                           | 1.03E-01                 | 5.00E-05                 | 9.33E-01                 | 2.85E-04                 |
| Acta2_chr19         | 29    | 33       | 41    | 15       | 0.2                          | 1.1                           | -1.5                         | 2.8                           | 3.60E-01                 | 5.00E-05                 | 9.98E-01                 | 2.85E-04                 |
| Actg2_chr6          | 3     | 3        | 4     | 1        | -0.1                         | 1.1                           | -1.8                         | 3.4                           | 8.00E-01                 | 5.00E-05                 | 1.00E+00                 | 2.85E-04                 |
| Adam19_chr11        | 20    | 21       | 44    | 22       | 0.1                          | 1.0                           | -1.0                         | 2.0                           | 7.55E-01                 | 5.00E-05                 | 1.00E+00                 | 2.85E-04                 |
| Adam28_chr14        | 1     | 1        | 2     | 1        | -0.1                         | 1.1                           | -0.9                         | 1.9                           | 3.54E-01                 | 5.00E-05                 | 1.00E+00                 | 2.61E-04                 |
| Adck3_chr1          | 6     | 7        | 16    | 9        | 0.4                          | 1.3                           | -0.8                         | 1.7                           | 5.12E-01                 | 9.78E-03                 | 1.00E+00                 | 2.84E-02                 |
| Adcy5_chr16         | 2     | 2        | 6     | 3        | 0.1                          | 1.1                           | -1.2                         | 2.4                           | 6.59E-01                 | 5.00E-05                 | 1.00E+00                 | 2.85E-04                 |
| Adcy7_chr8          | 43    | 42       | 79    | 49       | 0.0                          | 1.0                           | -0.7                         | 1.6                           | 8.86E-01                 | 2.34E-02                 | 1.00E+00                 | 6.24E-02                 |
| Aff4_chr11          | 19    | 18       | 36    | 22       | -0.1                         | 1.0                           | -0.7                         | 1.6                           | 8.17E-01                 | 1.00E-04                 | 1.00E+00                 | 5.44E-04                 |
| Afp_chr5            | 1     | 2        | 2     | 1        | 0.2                          | 1.2                           | -0.7                         | 1.6                           | 6.15E-01                 | 1.35E-03                 | 1.00E+00                 | 5.55E-03                 |
| Ago1_chr4           | 17    | 18       | 38    | 20       | 0.0                          | 1.0                           | -0.9                         | 1.9                           | 9.21E-01                 | 5.00E-05                 | 1.00E+00                 | 2.85E-04                 |
| Ak1_chr2            | 2     | 3        | 3     | 2        | 0.3                          | 1.2                           | -0.6                         | 1.5                           | 4.92E-01                 | 7.69E-03                 | 1.00E+00                 | 2.42E-02                 |
| Akap12_chr10        | 8     | 11       | 19    | 10       | 0.5                          | 1.4                           | -0.9                         | 1.9                           | 2.53E-02                 | 5.00E-05                 | 6.89E-01                 | 2.85E-04                 |
| Akap2_chr4          | 6     | 6        | 12    | 7        | 0.3                          | 1.2                           | -0.8                         | 1.8                           | 5.84E-01                 | 4.72E-02                 | 1.00E+00                 | 9.50E-02                 |
| Akna_chr4           | 46    | 57       | 124   | 82       | 0.3                          | 1.3                           | -0.6                         | 1.5                           | 1.59E-01                 | 7.50E-04                 | 9.20E-01                 | 3.33E-03                 |
| Akt3_chr1           | 22    | 19       | 36    | 22       | -0.2                         | 1.2                           | -0.7                         | 1.6                           | 3.16E-01                 | 5.00E-05                 | 9.87E-01                 | 2.85E-04                 |
| Aldoc_chr11         | 1     | 2        | 2     | 1        | 1.0                          | 2.0                           | -0.6                         | 1.5                           | 3.50E-02                 | 2.05E-03                 | 7.69E-01                 | 8.00E-03                 |
| Alkbh6_chr7         | 7     | 8        | 7     | 4        | 0.1                          | 1.1                           | -0.7                         | 1.6                           | 7.33E-01                 | 5.00E-04                 | 1.00E+00                 | 2.32E-03                 |
| Alpl_chr4           | 4     | 2        | 9     | 4        | -0.7                         | 1.7                           | -1.1                         | 2.2                           | 3.89E-02                 | 5.00E-05                 | 7.91E-01                 | 2.85E-04                 |
| Als2cl_chr9         | 13    | 8        | 8     | 2        | -0.9                         | 1.8                           | -1.8                         | 3.6                           | 3.95E-03                 | 3.43E-02                 | 2.84E-01                 | 9.63E-02                 |
| Amotl2_chr9         | 4     | 6        | 12    | 8        | 0.4                          | 1.3                           | -0.6                         | 1.5                           | 1.65E-01                 | 5.00E-05                 | 9.80E-01                 | 2.85E-04                 |
| Angel1_chr12        | 2     | 3        | 5     | 3        | 0.3                          | 1.2                           | -0.7                         | 1.6                           | 3.57E-01                 | 5.00E-05                 | 9.98E-01                 | 2.85E-04                 |
| Angpt2_chr8         | 4     | 3        | 6     | 2        | -0.5                         | 1.4                           | -1.6                         | 2.9                           | 1.79E-01                 | 9.20E-03                 | 9.84E-01                 | 2.91E-02                 |
| Angptl2_chr2        | 18    | 12       | 38    | 17       | -0.6                         | 1.6                           | -1.1                         | 2.2                           | 6.05E-03                 | 5.00E-05                 | 2.81E-01                 | 2.85E-04                 |
| Ank2_chr3           | 1     | 1        | 3     | 1        | -0.2                         | 1.1                           | -0.9                         | 1.9                           | 6.38E-01                 | 5.00E-05                 | 1.00E+00                 | 2.85E-04                 |
| Ankrd33b_chr15      | 4     | 3        | 9     | 3        | -0.6                         | 1.5                           | -1.8                         | 3.4                           | 2.00E-02                 | 5.00E-05                 | 5.20E-01                 | 2.85E-04                 |
| Ankrd44_chr1        | 29    | 34       | 56    | 33       | 0.2                          | 1.2                           | -0.7                         | 1.7                           | 3.34E-01                 | 5.00E-05                 | 9.90E-01                 | 2.85E-04                 |
| Anxa6_chr11         | 46    | 64       | 86    | 57       | 0.5                          | 1.4                           | -0.6                         | 1.5                           | 1.09E-01                 | 7.73E-03                 | 9.14E-01                 | 2.52E-02                 |
| Apbb1_chr7          | 1     | 2        | 2     | 1        | 0.5                          | 1.4                           | -1.1                         | 2.1                           | 2.91E-01                 | 5.00E-05                 | 9.91E-01                 | 2.70E-04                 |
| Arhgap20_chr9       | 1     | 1        | 2     | 1        | 0.3                          | 1.2                           | -0.7                         | 1.6                           | 5.93E-02                 | 5.00E-05                 | 8.71E-01                 | 2.85E-04                 |
| Arhgap24_chr5       | 6     | 7        | 11    | 7        | 0.2                          | 1.2                           | -0.7                         | 1.7                           | 3.39E-01                 | 5.00E-05                 | 9.98E-01                 | 2.85E-04                 |
| Arhgap42_chr9       | 2     | 1        | 3     | 2        | -0.7                         | 1.7                           | -0.7                         | 1.6                           | 4.30E-02                 | 5.00E-05                 | 8.14E-01                 | 2.85E-04                 |
| Arhgef11_chr3       | 7     | 7        | 17    | 10       | 0.1                          | 1.1                           | -0.7                         | 1.6                           | 6.26E-01                 | 5.00E-05                 | 1.00E+00                 | 2.85E-04                 |
| Arhgef17_chr7       | 4     | 4        | 10    | 7        | -0.1                         | 1.0                           | -0.6                         | 1.5                           | 8.16E-01                 | 1.00E-04                 | 1.00E+00                 | 5.44E-04                 |
| Arhgef18_chr8       | 36    | 38       | 86    | 44       | 0.1                          | 1.0                           | -0.9                         | 1.9                           | 8.01E-01                 | 5.00E-05                 | 1.00E+00                 | 2.85E-04                 |
| Arhgef3_chr14       | 33    | 42       | 58    | 36       | 0.4                          | 1.3                           | -0.7                         | 1.6                           | 8.90E-02                 | 5.00E-05                 | 9.27E-01                 | 2.85E-04                 |
| Arid1b_chr17        | 9     | 11       | 25    | 15       | 0.3                          | 1.3                           | -0.7                         | 1.6                           | 1.23E-01                 | 5.00E-05                 | 9.50E-01                 | 2.85E-04                 |
| Arid3b_chr9         | 14    | 16       | 24    | 16       | 0.2                          | 1.2                           | -0.6                         | 1.5                           | 2.65E-01                 | 5.00E-05                 | 9.94E-01                 | 2.85E-04                 |

|                       |     |     |     |     |      |     |      |     |          |          |          |          |
|-----------------------|-----|-----|-----|-----|------|-----|------|-----|----------|----------|----------|----------|
| Arl4c_chr1            | 21  | 23  | 36  | 19  | 0.1  | 1.1 | -0.9 | 1.8 | 7.12E-01 | 5.00E-05 | 1.00E+00 | 2.85E-04 |
| Arl4d_chr11           | 4   | 4   | 5   | 3   | -0.1 | 1.1 | -1.1 | 2.1 | 7.67E-01 | 5.00E-05 | 1.00E+00 | 2.85E-04 |
| Arl5c_chr11           | 22  | 23  | 24  | 10  | 0.0  | 1.0 | -1.3 | 2.4 | 8.80E-01 | 5.00E-05 | 1.00E+00 | 2.85E-04 |
| Arnt2_chr7            | 1   | 2   | 3   | 2   | 0.3  | 1.2 | -0.9 | 1.9 | 4.34E-01 | 5.00E-05 | 1.00E+00 | 2.85E-04 |
| Aspn_chr13            | 1   | 0   | 2   | 1   | -0.3 | 1.2 | -0.6 | 1.5 | 8.13E-02 | 2.86E-02 | 9.10E-01 | 7.25E-02 |
| Ass1_chr2             | 7   | 8   | 14  | 9   | 0.2  | 1.1 | -0.7 | 1.6 | 6.09E-01 | 1.80E-03 | 1.00E+00 | 7.14E-03 |
| Atn1_chr6             | 11  | 13  | 25  | 17  | 0.2  | 1.2 | -0.6 | 1.5 | 2.62E-01 | 1.00E-04 | 9.94E-01 | 5.44E-04 |
| Atoh8_chr6            | 2   | 2   | 4   | 2   | 0.3  | 1.2 | -0.7 | 1.6 | 4.63E-01 | 1.50E-04 | 1.00E+00 | 7.89E-04 |
| Atp10d_chr5           | 16  | 18  | 24  | 10  | 0.2  | 1.1 | -1.3 | 2.5 | 1.00E+00 | 1.17E-02 | 1.00E+00 | 3.47E-02 |
| Atp1a2_chr1           | 1   | 1   | 3   | 1   | -0.2 | 1.1 | -1.5 | 2.8 | 6.10E-01 | 5.00E-05 | 1.00E+00 | 2.85E-04 |
| Axin2_chr11           | 2   | 3   | 5   | 3   | 0.4  | 1.3 | -0.7 | 1.6 | 2.59E-01 | 5.00E-05 | 9.93E-01 | 2.85E-04 |
| B3glct_chr5           | 4   | 3   | 7   | 4   | -0.3 | 1.3 | -0.6 | 1.5 | 2.23E-01 | 1.50E-04 | 9.91E-01 | 7.89E-04 |
| B3gnt2_chr11          | 21  | 26  | 33  | 23  | 0.3  | 1.2 | -0.6 | 1.5 | 2.91E-01 | 2.27E-02 | 9.88E-01 | 6.00E-02 |
| B3gnt5_chr16          | 17  | 18  | 25  | 15  | 0.1  | 1.1 | -0.8 | 1.7 | 6.76E-01 | 9.03E-03 | 1.00E+00 | 2.70E-02 |
| B4galnt1_chr10        | 24  | 32  | 7   | 1   | 0.5  | 1.4 | -2.4 | 5.3 | 3.70E-01 | 4.91E-02 | 9.67E-01 | 1.30E-01 |
| Bank1_chr3            | 99  | 125 | 162 | 81  | 0.3  | 1.3 | -1.0 | 2.0 | 1.66E-01 | 5.00E-05 | 9.80E-01 | 2.85E-04 |
| BC017612_chr9         | 5   | 6   | 5   | 3   | 0.1  | 1.1 | -0.8 | 1.7 | 7.79E-01 | 1.00E-04 | 1.00E+00 | 5.44E-04 |
| Bcar3_chr3            | 20  | 26  | 42  | 26  | 0.3  | 1.3 | -0.7 | 1.6 | 1.02E-01 | 5.00E-05 | 9.38E-01 | 2.85E-04 |
| Bcl11b_chr12          | 3   | 4   | 7   | 3   | 0.1  | 1.1 | -1.1 | 2.2 | 8.26E-01 | 5.00E-05 | 1.00E+00 | 2.92E-04 |
| Bcl2l14_chr6          | 1   | 1   | 2   | 1   | -0.1 | 1.0 | -0.6 | 1.5 | 4.64E-01 | 3.15E-03 | 1.00E+00 | 1.16E-02 |
| Bcl7a_chr5            | 13  | 14  | 23  | 15  | 0.0  | 1.0 | -0.7 | 1.6 | 8.59E-01 | 5.00E-05 | 1.00E+00 | 2.85E-04 |
| Bend5_chr4            | 6   | 6   | 8   | 5   | 0.1  | 1.1 | -0.7 | 1.7 | 7.02E-01 | 3.32E-03 | 1.00E+00 | 1.20E-02 |
| Bend6_chr1            | 1   | 1   | 2   | 1   | -0.2 | 1.1 | -0.7 | 1.7 | 6.77E-01 | 1.10E-03 | 1.00E+00 | 4.65E-03 |
| Birc3_chr9            | 55  | 62  | 89  | 55  | 0.2  | 1.1 | -0.7 | 1.6 | 4.19E-01 | 5.00E-05 | 1.00E+00 | 2.85E-04 |
| Blk_chr14             | 84  | 104 | 143 | 89  | 0.3  | 1.2 | -0.7 | 1.6 | 1.70E-01 | 5.00E-05 | 9.80E-01 | 2.85E-04 |
| Blnk_chr19            | 52  | 73  | 81  | 51  | 0.5  | 1.4 | -0.7 | 1.6 | 1.72E-02 | 5.00E-05 | 5.91E-01 | 2.85E-04 |
| Bmf_chr2              | 11  | 11  | 21  | 12  | 0.0  | 1.0 | -0.9 | 1.8 | 9.37E-01 | 5.00E-05 | 1.00E+00 | 2.85E-04 |
| Bptf_chr11            | 17  | 19  | 36  | 23  | 0.1  | 1.1 | -0.7 | 1.6 | 5.59E-01 | 5.00E-05 | 1.00E+00 | 2.85E-04 |
| Btbd11_chr10          | 1   | 1   | 3   | 2   | 0.0  | 1.0 | -0.7 | 1.7 | 8.34E-01 | 5.00E-05 | 1.00E+00 | 2.85E-04 |
| Btg1_chr10            | 74  | 99  | 94  | 62  | 0.4  | 1.3 | -0.6 | 1.5 | 8.90E-02 | 4.50E-04 | 9.27E-01 | 2.12E-03 |
| Btnl2_chr17           | 3   | 3   | 4   | 2   | 0.2  | 1.1 | -0.8 | 1.7 | 6.18E-01 | 5.00E-05 | 1.00E+00 | 2.85E-04 |
| C130074G19Rik_chr1    | 3   | 4   | 4   | 2   | 0.5  | 1.4 | -0.7 | 1.7 | 1.43E-01 | 5.00E-05 | 9.67E-01 | 2.85E-04 |
| C1s2_chr6             | 3   | 0   | 4   | 0   | -1.3 | 2.5 | -2.1 | 4.2 | 7.20E-11 | 5.00E-05 | 1.23E-07 | 2.85E-04 |
| Cables2_chr2          | 15  | 18  | 25  | 14  | 0.3  | 1.2 | -0.8 | 1.8 | 1.89E-01 | 5.00E-05 | 9.86E-01 | 2.85E-04 |
| Cacna1a_chr8          | 1   | 0   | 2   | 0   | 0.0  | 1.0 | -0.6 | 1.5 | 5.33E-02 | 5.00E-05 | 8.48E-01 | 2.61E-04 |
| Cacna2d1_chr5         | 1   | 1   | 2   | 1   | -0.2 | 1.2 | -0.7 | 1.6 | 1.96E-01 | 5.00E-04 | 9.74E-01 | 2.35E-03 |
| Cacnb1_chr11          | 2   | 2   | 4   | 2   | -0.2 | 1.1 | -0.9 | 1.9 | 6.88E-01 | 4.00E-04 | 1.00E+00 | 1.93E-03 |
| Cacnb3_chr15          | 4   | 4   | 7   | 5   | -0.1 | 1.1 | -0.6 | 1.5 | 7.54E-01 | 9.00E-04 | 1.00E+00 | 3.95E-03 |
| Cadm1_chr9            | 9   | 6   | 7   | 2   | -0.8 | 1.8 | -2.0 | 4.1 | 5.01E-02 | 5.00E-05 | 7.55E-01 | 3.08E-04 |
| Cald1_chr6            | 27  | 26  | 42  | 27  | -0.1 | 1.1 | -0.7 | 1.6 | 6.95E-01 | 5.00E-05 | 1.00E+00 | 2.85E-04 |
| Calhm2_chr19          | 13  | 19  | 25  | 16  | 0.5  | 1.4 | -0.6 | 1.6 | 2.18E-02 | 5.00E-05 | 6.58E-01 | 2.85E-04 |
| Camk4_chr18           | 2   | 2   | 4   | 2   | -0.4 | 1.3 | -0.9 | 1.8 | 9.21E-02 | 5.00E-05 | 9.27E-01 | 2.85E-04 |
| Car3_chr3             | 2   | 1   | 2   | 1   | -0.7 | 1.6 | -1.2 | 2.3 | 9.76E-02 | 5.00E-05 | 8.43E-01 | 2.85E-04 |
| Card11_chr5           | 31  | 40  | 69  | 39  | 0.4  | 1.3 | -0.8 | 1.8 | 8.13E-02 | 5.00E-05 | 9.10E-01 | 2.85E-04 |
| Carns1_chr19          | 13  | 14  | 22  | 12  | 0.1  | 1.1 | -0.8 | 1.7 | 5.46E-01 | 5.00E-05 | 1.00E+00 | 2.85E-04 |
| CasZ1_chr4            | 1   | 2   | 3   | 2   | 0.3  | 1.3 | -0.6 | 1.6 | 3.88E-01 | 7.98E-03 | 1.00E+00 | 2.45E-02 |
| Cbx7_chr15            | 18  | 19  | 29  | 17  | 0.1  | 1.1 | -0.8 | 1.7 | 5.55E-01 | 5.00E-05 | 1.00E+00 | 2.85E-04 |
| Cc2d2a_chr5           | 1   | 1   | 2   | 2   | -0.2 | 1.2 | -0.6 | 1.6 | 5.29E-01 | 1.50E-04 | 1.00E+00 | 7.89E-04 |
| Ccdc109b_chr3         | 2   | 1   | 2   | 1   | -0.5 | 1.4 | -0.8 | 1.7 | 3.73E-01 | 5.00E-05 | 1.00E+00 | 2.85E-04 |
| Ccdc61_chr7           | 5   | 4   | 8   | 3   | -0.2 | 1.1 | -1.5 | 2.8 | 6.03E-01 | 5.00E-05 | 1.00E+00 | 2.85E-04 |
| Ccdc64_chr5           | 4   | 4   | 10  | 6   | -0.2 | 1.1 | -0.8 | 1.8 | 5.77E-01 | 5.00E-05 | 1.00E+00 | 2.85E-04 |
| Ccl19_chr4            | 65  | 56  | 68  | 24  | -0.2 | 1.2 | -1.5 | 2.8 | 3.31E-01 | 5.00E-05 | 1.00E+00 | 2.97E-04 |
| Ccl19_chr4_JH584294_r | 65  | 56  | 68  | 24  | -0.2 | 1.2 | -1.5 | 2.8 | 3.31E-01 | 5.00E-05 | 9.90E-01 | 2.49E-04 |
| Ccl21a_chr4           | 61  | 28  | 62  | 32  | -1.1 | 2.1 | -0.9 | 1.9 | 1.18E-05 | 5.00E-05 | 3.78E-03 | 2.92E-04 |
| Ccnj_chr19            | 8   | 8   | 11  | 7   | 0.1  | 1.0 | -0.7 | 1.6 | 8.12E-01 | 5.00E-05 | 1.00E+00 | 2.85E-04 |
| Ccr9_chr9             | 3   | 2   | 3   | 1   | -0.4 | 1.3 | -1.1 | 2.1 | 2.72E-01 | 1.97E-02 | 9.97E-01 | 4.47E-02 |
| Cd180_chr13           | 53  | 62  | 87  | 50  | 0.2  | 1.2 | -0.8 | 1.7 | 2.55E-01 | 5.00E-05 | 9.92E-01 | 2.85E-04 |
| Cd207_chr6            | 8   | 2   | 10  | 3   | -1.7 | 3.2 | -1.8 | 3.6 | 1.28E-05 | 5.00E-05 | 3.53E-03 | 2.85E-04 |
| Cd209b_chr8           | 6   | 3   | 13  | 5   | -1.0 | 2.0 | -1.4 | 2.6 | 3.10E-01 | 6.82E-03 | 8.84E-01 | 2.06E-02 |
| Cd209d_chr8           | 5   | 5   | 4   | 1   | -0.1 | 1.0 | -1.9 | 3.8 | 8.83E-01 | 5.00E-05 | 1.00E+00 | 2.85E-04 |
| Cd247_chr1            | 21  | 17  | 28  | 15  | -0.3 | 1.2 | -0.9 | 1.9 | 6.41E-01 | 4.54E-02 | 1.00E+00 | 1.11E-01 |
| Cd27_chr6             | 15  | 13  | 21  | 13  | -0.2 | 1.2 | -0.7 | 1.7 | 5.71E-01 | 9.43E-03 | 1.00E+00 | 2.99E-02 |
| Cd28_chr1             | 11  | 10  | 15  | 9   | -0.1 | 1.0 | -0.8 | 1.7 | 7.94E-01 | 5.00E-05 | 1.00E+00 | 2.85E-04 |
| Cd300lg_chr11         | 4   | 4   | 7   | 3   | 0.1  | 1.1 | -1.0 | 2.0 | 7.76E-01 | 5.00E-05 | 1.00E+00 | 2.85E-04 |
| Cd37_chr7             | 205 | 287 | 263 | 151 | 0.5  | 1.4 | -0.8 | 1.7 | 3.45E-02 | 5.00E-05 | 7.66E-01 | 2.85E-04 |
| Cd3e_chr9             | 20  | 22  | 34  | 15  | 0.2  | 1.1 | -1.2 | 2.3 | 5.20E-01 | 5.00E-05 | 1.00E+00 | 2.85E-04 |
| Cd4_chr6              | 24  | 29  | 45  | 26  | 0.2  | 1.2 | -0.8 | 1.7 | 2.72E-01 | 5.00E-05 | 9.94E-01 | 2.85E-04 |
| Cd5_chr19             | 11  | 12  | 19  | 10  | 0.2  | 1.2 | -0.9 | 1.9 | 3.50E-01 | 5.00E-05 | 9.98E-01 | 2.85E-04 |
| Cd79b_chr11           | 303 | 410 | 333 | 149 | 0.4  | 1.4 | -1.2 | 2.2 | 7.84E-02 | 5.00E-05 | 9.04E-01 | 2.85E-04 |
| Cd84_chr1             | 29  | 24  | 8   | 2   | -0.6 | 1.5 | -1.8 | 3.4 | 3.00E-01 | 6.75E-03 | 9.65E-01 | 2.40E-02 |
| Cd8a_chr6             | 12  | 11  | 20  | 10  | -0.1 | 1.1 | -1.0 | 2.0 | 6.71E-01 | 2.00E-04 | 1.00E+00 | 1.03E-03 |
| Cd96_chr16            | 8   | 7   | 11  | 5   | -0.2 | 1.2 | -1.0 | 2.0 | 4.39E-01 | 5.00E-05 | 1.00E+00 | 2.85E-04 |
| Cdc14b_chr13          | 3   | 3   | 4   | 3   | -0.1 | 1.1 | -0.6 | 1.5 | 6.83E-01 | 8.88E-04 | 1.00E+00 | 3.91E-03 |
| Cdh11_chr8            | 6   | 6   | 11  | 6   | 0.1  | 1.0 | -0.8 | 1.8 | 8.28E-01 | 5.00E-05 | 1.00E+00 | 2.85E-04 |
| Cdh2_chr18            | 1   | 1   | 2   | 1   | 0.0  | 1.0 | -0.7 | 1.6 | 7.07E-01 | 5.00E-05 | 1.00E+00 | 2.85E-04 |
| Cdon_chr9             | 5   | 5   | 9   | 5   | 0.0  | 1.0 | -0.9 | 1.9 | 9.91E-01 | 5.00E-05 | 1.00E+00 | 2.85E-04 |
| Ceacam2_chr7          | 2   | 2   | 4   | 0   | -0.4 | 1.3 | -2.0 | 4.0 | 1.00E+00 | 5.85E-03 | 1.00E+00 | 1.84E-02 |
| Cep162_chr9           | 6   | 6   | 9   | 6   | 0.0  | 1.0 | -0.7 | 1.6 | 8.92E-01 | 5.00E-05 | 1.00E+00 | 2.85E-04 |
| Cers4_chr8            | 8   | 9   | 12  | 8   | 0.2  | 1.2 | -0.6 | 1.5 | 3.31E-01 | 1.00E-04 | 9.98E-01 | 5.44E-04 |
| Ch25h_chr19           | 1   | 1   | 2   | 1   | 0.0  | 1.0 | -0.7 | 1.6 | 9.98E-01 | 2.50E-04 | 1.00E+00 | 1.25E-03 |
| Chd2_chr7             | 26  | 26  | 41  | 26  | 0.0  | 1.0 | -0.6 | 1.5 | 8.99E-01 | 5.50E-04 | 1.00E+00 | 2.52E-03 |
| Chd3_chr11            | 45  | 41  | 90  | 49  | -0.1 | 1.1 | -0.9 | 1.8 | 5.61E-01 | 5.00E-05 | 1.00E+00 | 2.85E-04 |
| Chd6_chr2             | 12  | 11  | 24  | 15  | -0.1 | 1.1 | -0.7 | 1.6 | 4.89E-01 | 5.00E-05 | 1.00E+00 | 2.85E-04 |

|                     |     |     |     |     |      |     |      |      |          |          |          |          |
|---------------------|-----|-----|-----|-----|------|-----|------|------|----------|----------|----------|----------|
| Chst10_chr1         | 6   | 8   | 10  | 7   | 0.5  | 1.4 | -0.7 | 1.6  | 4.03E-02 | 5.00E-05 | 6.89E-01 | 2.85E-04 |
| Chst15_chr7         | 22  | 25  | 54  | 35  | 0.1  | 1.1 | -0.6 | 1.5  | 5.10E-01 | 5.00E-05 | 1.00E+00 | 2.85E-04 |
| Cilp_chr9           | 2   | 1   | 4   | 1   | -0.7 | 1.6 | -2.1 | 4.2  | 7.71E-02 | 5.00E-05 | 9.03E-01 | 2.85E-04 |
| Clcf1_chr19         | 16  | 19  | 24  | 16  | 0.3  | 1.2 | -0.6 | 1.5  | 2.53E-01 | 4.50E-04 | 9.92E-01 | 2.12E-03 |
| Clcn5_chrX          | 2   | 2   | 4   | 2   | -0.3 | 1.2 | -0.8 | 1.8  | 4.78E-01 | 1.85E-03 | 1.00E+00 | 7.36E-03 |
| Clec14a_chr12       | 5   | 4   | 8   | 4   | -0.1 | 1.1 | -0.8 | 1.7  | 6.89E-01 | 5.00E-05 | 1.00E+00 | 2.85E-04 |
| Clec2i_chr6         | 28  | 23  | 34  | 19  | -0.3 | 1.2 | -0.9 | 1.8  | 3.78E-01 | 4.25E-03 | 1.00E+00 | 1.51E-02 |
| Clec4g_chr8         | 12  | 8   | 14  | 6   | -0.6 | 1.5 | -1.3 | 2.5  | 4.93E-02 | 5.00E-05 | 8.46E-01 | 2.85E-04 |
| Clec9a_chr6         | 6   | 3   | 7   | 2   | -1.1 | 2.1 | -1.7 | 3.3  | 5.31E-02 | 5.00E-05 | 4.13E-01 | 3.08E-04 |
| Clip3_chr7          | 2   | 2   | 5   | 3   | 0.2  | 1.1 | -0.6 | 1.5  | 6.27E-01 | 5.00E-04 | 1.00E+00 | 2.32E-03 |
| Clmp_chr9           | 1   | 1   | 3   | 1   | -0.2 | 1.2 | -1.4 | 2.6  | 5.97E-01 | 5.00E-05 | 1.00E+00 | 2.85E-04 |
| Clu_chr14           | 86  | 59  | 152 | 65  | -0.5 | 1.5 | -1.2 | 2.3  | 9.12E-03 | 5.00E-05 | 4.45E-01 | 2.85E-04 |
| Cmtm4_chr8          | 5   | 4   | 10  | 7   | -0.3 | 1.2 | -0.6 | 1.6  | 2.24E-01 | 5.00E-05 | 9.64E-01 | 2.85E-04 |
| Cnn3_chr3           | 39  | 49  | 58  | 28  | 0.3  | 1.3 | -1.1 | 2.1  | 1.04E-01 | 5.00E-05 | 9.38E-01 | 2.85E-04 |
| Cnp_chr11           | 52  | 68  | 88  | 52  | 0.4  | 1.3 | -0.8 | 1.7  | 7.24E-02 | 5.00E-05 | 8.93E-01 | 2.85E-04 |
| Cnr2_chr4           | 34  | 44  | 70  | 40  | 0.4  | 1.3 | -0.8 | 1.7  | 8.04E-02 | 5.00E-05 | 9.08E-01 | 2.85E-04 |
| Cobl1_chr2          | 4   | 6   | 9   | 5   | 0.6  | 1.5 | -0.8 | 1.7  | 8.30E-02 | 2.72E-02 | 8.70E-01 | 6.23E-02 |
| Coch_chr12          | 263 | 235 | 481 | 136 | -0.1 | 1.0 | -1.8 | 3.5  | 6.30E-01 | 5.00E-05 | 1.00E+00 | 2.85E-04 |
| Col12a1_chr9        | 1   | 1   | 3   | 2   | 0.0  | 1.0 | -0.7 | 1.6  | 9.87E-01 | 1.00E-04 | 1.00E+00 | 5.44E-04 |
| Col16a1_chr4        | 3   | 3   | 6   | 4   | -0.1 | 1.1 | -0.6 | 1.6  | 7.11E-01 | 5.00E-05 | 1.00E+00 | 2.85E-04 |
| Col27a1_chr4        | 3   | 2   | 5   | 3   | -0.3 | 1.2 | -0.8 | 1.7  | 2.62E-01 | 5.00E-05 | 9.94E-01 | 2.85E-04 |
| Col4a5_chrX         | 1   | 1   | 2   | 1   | 0.0  | 1.0 | -0.7 | 1.6  | 7.13E-01 | 5.00E-05 | 1.00E+00 | 2.72E-04 |
| Col6a1_chr10        | 4   | 5   | 10  | 6   | 0.3  | 1.2 | -0.7 | 1.6  | 3.17E-01 | 5.00E-05 | 9.97E-01 | 2.85E-04 |
| Col6a4_chr9         | 1   | 7   | 2   | 1   | 2.9  | 7.3 | -1.2 | 2.3  | 1.00E-20 | 5.00E-05 | 1.00E-20 | 2.85E-04 |
| Col8a2_chr4         | 4   | 4   | 8   | 4   | 0.0  | 1.0 | -1.1 | 2.1  | 9.85E-01 | 5.00E-05 | 1.00E+00 | 2.85E-04 |
| Colq_chr14          | 4   | 4   | 7   | 4   | -0.1 | 1.1 | -0.8 | 1.7  | 7.63E-01 | 5.00E-05 | 1.00E+00 | 2.85E-04 |
| Comm66_chr14        | 22  | 20  | 22  | 1   | -0.2 | 1.1 | -4.4 | 21.8 | 5.52E-01 | 1.50E-04 | 1.00E+00 | 8.53E-04 |
| Cplx2_chr13         | 2   | 2   | 4   | 3   | -0.2 | 1.1 | -0.6 | 1.5  | 6.37E-01 | 3.50E-04 | 1.00E+00 | 1.69E-03 |
| Cpxm2_chr7          | 3   | 3   | 5   | 3   | 0.2  | 1.1 | -0.9 | 1.9  | 5.90E-01 | 5.00E-05 | 1.00E+00 | 2.85E-04 |
| Cr2_chr1            | 145 | 179 | 226 | 127 | 0.3  | 1.2 | -0.8 | 1.8  | 3.54E-01 | 2.00E-04 | 9.98E-01 | 1.02E-03 |
| Crim1_chr17         | 13  | 15  | 29  | 14  | 0.2  | 1.2 | -1.1 | 2.1  | 2.88E-01 | 5.00E-05 | 9.81E-01 | 2.85E-04 |
| Cryab_chr9          | 2   | 2   | 3   | 2   | 0.3  | 1.2 | -0.8 | 1.7  | 5.24E-01 | 4.50E-04 | 1.00E+00 | 2.12E-03 |
| Csdc2_chr15         | 1   | 1   | 2   | 1   | 0.5  | 1.5 | -0.8 | 1.8  | 5.82E-02 | 1.00E-04 | 8.69E-01 | 5.44E-04 |
| Csmd1_chr8          | 1   | 1   | 2   | 1   | 0.0  | 1.0 | -1.0 | 1.9  | 6.07E-01 | 5.00E-05 | 1.00E+00 | 2.85E-04 |
| Csrnp2_chr15        | 2   | 2   | 3   | 2   | 0.0  | 1.0 | -0.9 | 1.9  | 9.36E-01 | 5.00E-05 | 1.00E+00 | 2.85E-04 |
| Csrp2_chr10         | 4   | 4   | 4   | 2   | -0.2 | 1.1 | -0.7 | 1.7  | 7.27E-01 | 1.35E-03 | 1.00E+00 | 5.55E-03 |
| Ctgf_chr10          | 19  | 21  | 33  | 16  | 0.1  | 1.1 | -1.0 | 2.0  | 5.35E-01 | 5.00E-05 | 1.00E+00 | 2.85E-04 |
| Ctso_chr3           | 25  | 24  | 31  | 18  | 0.0  | 1.0 | -0.8 | 1.7  | 8.38E-01 | 5.00E-05 | 1.00E+00 | 2.85E-04 |
| Cx3cr1_chr9         | 6   | 8   | 12  | 8   | 0.5  | 1.4 | -0.6 | 1.5  | 5.55E-02 | 5.00E-05 | 8.56E-01 | 2.85E-04 |
| Cxcl13_chr5         | 65  | 26  | 59  | 18  | -1.3 | 2.5 | -1.8 | 3.4  | 3.35E-09 | 5.00E-05 | 3.59E-06 | 2.85E-04 |
| Cxx1c_chrX          | 6   | 7   | 8   | 5   | 0.3  | 1.3 | -0.6 | 1.5  | 3.47E-01 | 1.05E-03 | 9.98E-01 | 4.47E-03 |
| Cxxc5_chr18         | 11  | 14  | 18  | 9   | 0.4  | 1.3 | -1.0 | 1.9  | 8.53E-02 | 5.00E-05 | 9.18E-01 | 2.85E-04 |
| Cybrd1_chr2         | 1   | 0   | 2   | 1   | 0.0  | 1.0 | -0.8 | 1.7  | 4.83E-02 | 5.00E-05 | 8.46E-01 | 2.85E-04 |
| Cyp2d22_chr15       | 3   | 3   | 5   | 3   | 0.3  | 1.3 | -0.7 | 1.6  | 3.47E-01 | 1.13E-04 | 1.00E+00 | 6.13E-04 |
| Cyp2r1_chr7         | 1   | 1   | 2   | 1   | -0.1 | 1.1 | -0.7 | 1.6  | 7.83E-01 | 3.90E-03 | 1.00E+00 | 1.39E-02 |
| Cyp39a1_chr17       | 9   | 6   | 14  | 3   | -0.5 | 1.4 | -2.1 | 4.4  | 4.21E-02 | 5.00E-05 | 8.13E-01 | 2.85E-04 |
| Cyr61_chr3          | 5   | 6   | 8   | 3   | 0.1  | 1.1 | -1.5 | 2.8  | 7.50E-01 | 5.00E-05 | 1.00E+00 | 2.85E-04 |
| D130040H23Rik_chr8  | 6   | 4   | 10  | 6   | -0.5 | 1.5 | -0.7 | 1.6  | 9.10E-02 | 5.00E-05 | 8.35E-01 | 2.85E-04 |
| D430019H16Rik_chr12 | 2   | 2   | 3   | 2   | -0.1 | 1.1 | -0.9 | 1.9  | 6.95E-01 | 5.00E-05 | 1.00E+00 | 2.85E-04 |
| D8Ert82e_chr8       | 6   | 8   | 17  | 10  | 0.5  | 1.4 | -0.7 | 1.6  | 3.03E-02 | 5.00E-05 | 7.39E-01 | 2.85E-04 |
| Daam2_chr17         | 2   | 3   | 6   | 4   | 0.3  | 1.3 | -0.7 | 1.6  | 2.03E-01 | 5.00E-05 | 9.87E-01 | 2.85E-04 |
| Dag1_chr9           | 10  | 13  | 27  | 17  | 0.4  | 1.3 | -0.7 | 1.6  | 6.26E-02 | 5.00E-05 | 7.70E-01 | 2.85E-04 |
| Dapl1_chr2          | 14  | 3   | 7   | 0   | -2.2 | 4.5 | -2.9 | 7.5  | 3.28E-06 | 5.00E-05 | 1.12E-03 | 2.85E-04 |
| Dbp_chr7            | 5   | 2   | 9   | 5   | -1.3 | 2.4 | -1.0 | 2.0  | 2.59E-02 | 6.05E-03 | 6.95E-01 | 2.04E-02 |
| Dclk1_chr3          | 5   | 4   | 8   | 3   | -0.2 | 1.2 | -1.4 | 2.7  | 4.39E-01 | 6.67E-05 | 9.98E-01 | 3.86E-04 |
| Ddr2_chr1           | 2   | 2   | 5   | 3   | -0.2 | 1.2 | -0.9 | 1.9  | 3.48E-01 | 5.00E-05 | 9.98E-01 | 2.85E-04 |
| Dennd2a_chr6        | 4   | 4   | 10  | 6   | -0.1 | 1.1 | -0.8 | 1.7  | 7.45E-01 | 5.00E-05 | 1.00E+00 | 2.85E-04 |
| Dennd3_chr15        | 15  | 18  | 34  | 23  | 0.2  | 1.2 | -0.6 | 1.5  | 3.12E-01 | 5.00E-05 | 9.97E-01 | 2.85E-04 |
| Des_chr1            | 16  | 22  | 35  | 19  | 0.5  | 1.4 | -0.9 | 1.9  | 3.91E-02 | 5.00E-05 | 7.92E-01 | 2.85E-04 |
| Dgka_chr10          | 77  | 77  | 122 | 58  | 0.0  | 1.0 | -1.1 | 2.1  | 9.48E-01 | 5.00E-05 | 1.00E+00 | 2.85E-04 |
| Dgkd_chr1           | 55  | 63  | 119 | 63  | 0.2  | 1.1 | -0.9 | 1.9  | 3.94E-01 | 5.00E-05 | 1.00E+00 | 2.85E-04 |
| Dgke_chr11          | 4   | 4   | 8   | 5   | -0.3 | 1.2 | -0.7 | 1.6  | 2.76E-01 | 5.00E-05 | 9.94E-01 | 2.85E-04 |
| Diras2_chr13        | 1   | 1   | 2   | 1   | 0.5  | 1.4 | -0.7 | 1.6  | 2.07E-01 | 1.00E-04 | 9.88E-01 | 5.44E-04 |
| Dkk3_chr7           | 3   | 3   | 5   | 3   | 0.0  | 1.0 | -0.6 | 1.5  | 9.56E-01 | 1.00E-04 | 1.00E+00 | 5.44E-04 |
| Dlg2_chr7           | 1   | 1   | 2   | 1   | 0.0  | 1.0 | -0.6 | 1.5  | 7.93E-01 | 3.00E-04 | 1.00E+00 | 1.29E-03 |
| Dmd_chrX            | 2   | 1   | 3   | 2   | -0.5 | 1.5 | -0.8 | 1.8  | 3.86E-02 | 5.00E-05 | 7.89E-01 | 2.85E-04 |
| Dnase1l3_chr14      | 36  | 35  | 62  | 37  | -0.1 | 1.0 | -0.7 | 1.7  | 7.85E-01 | 5.00E-05 | 1.00E+00 | 2.85E-04 |
| Dnmbp_chr19         | 4   | 5   | 11  | 6   | 0.2  | 1.2 | -0.8 | 1.8  | 3.30E-01 | 5.00E-05 | 9.90E-01 | 2.85E-04 |
| Dntt_chr19          | 2   | 1   | 2   | 1   | -0.6 | 1.5 | -0.9 | 1.9  | 3.49E-01 | 5.00E-05 | 9.96E-01 | 2.85E-04 |
| Dock10_chr1         | 45  | 49  | 90  | 57  | 0.1  | 1.1 | -0.7 | 1.6  | 5.90E-01 | 3.00E-04 | 1.00E+00 | 1.47E-03 |
| Dock11_chrX         | 28  | 28  | 56  | 37  | 0.0  | 1.0 | -0.6 | 1.5  | 9.82E-01 | 3.50E-04 | 1.00E+00 | 1.69E-03 |
| Dock2_chr11         | 65  | 87  | 138 | 90  | 0.4  | 1.3 | -0.6 | 1.5  | 7.56E-02 | 5.50E-04 | 9.02E-01 | 2.52E-03 |
| Dock8_chr19         | 31  | 39  | 79  | 49  | 0.3  | 1.2 | -0.7 | 1.6  | 1.82E-01 | 5.00E-05 | 9.42E-01 | 2.85E-04 |
| Dock9_chr14         | 3   | 3   | 6   | 3   | 0.0  | 1.0 | -0.6 | 1.6  | 7.21E-01 | 4.96E-02 | 1.00E+00 | 1.04E-01 |
| Dok2_chr14          | 16  | 10  | 22  | 12  | -0.7 | 1.7 | -0.9 | 1.8  | 4.62E-03 | 5.00E-05 | 2.52E-01 | 2.85E-04 |
| Dopey1_chr9         | 7   | 7   | 14  | 9   | 0.0  | 1.0 | -0.7 | 1.6  | 9.06E-01 | 1.00E-04 | 1.00E+00 | 5.44E-04 |
| Dph5_chr3           | 17  | 17  | 19  | 11  | 0.1  | 1.0 | -0.8 | 1.7  | 7.85E-01 | 5.00E-05 | 1.00E+00 | 2.85E-04 |
| Dpyd_chr3           | 1   | 1   | 2   | 1   | 0.0  | 1.0 | -0.6 | 1.5  | 7.59E-01 | 5.00E-04 | 1.00E+00 | 2.32E-03 |
| Draxin_chr4         | 1   | 0   | 2   | 1   | 0.0  | 1.0 | -0.9 | 1.9  | 4.25E-04 | 5.00E-05 | 6.84E-02 | 2.85E-04 |
| Dsc2_chr18          | 2   | 0   | 4   | 1   | -1.3 | 2.4 | -2.2 | 4.5  | 4.50E-11 | 5.00E-05 | 3.69E-08 | 2.85E-04 |
| Dsc3_chr18          | 1   | 0   | 2   | 1   | 0.0  | 1.0 | -0.8 | 1.8  | 2.75E-06 | 5.00E-05 | 1.02E-03 | 2.85E-04 |
| Dtx1_chr5           | 41  | 58  | 102 | 62  | 0.5  | 1.4 | -0.7 | 1.6  | 2.34E-02 | 1.00E-04 | 6.69E-01 | 5.44E-04 |
| Dusp10_chr1         | 5   | 5   | 8   | 4   | -0.1 | 1.1 | -1.1 | 2.2  | 7.18E-01 | 5.00E-05 | 1.00E+00 | 2.85E-04 |

|                    |     |     |     |    |      |     |      |     |          |          |          |          |
|--------------------|-----|-----|-----|----|------|-----|------|-----|----------|----------|----------|----------|
| Dusp16_chr6        | 9   | 9   | 18  | 10 | -0.1 | 1.1 | -0.9 | 1.8 | 6.95E-01 | 5.00E-05 | 1.00E+00 | 2.85E-04 |
| Dusp2_chr2         | 18  | 25  | 28  | 17 | 0.4  | 1.4 | -0.7 | 1.6 | 5.25E-02 | 5.00E-05 | 8.48E-01 | 2.85E-04 |
| Dzip1_chr9         | 1   | 1   | 2   | 1  | -0.2 | 1.1 | -1.2 | 2.2 | 6.38E-01 | 5.00E-05 | 1.00E+00 | 2.85E-04 |
| E330009J07Rik_chr6 | 2   | 2   | 6   | 3  | 0.1  | 1.0 | -0.8 | 1.8 | 8.75E-01 | 5.00E-05 | 1.00E+00 | 2.85E-04 |
| Ece1_chr4          | 13  | 10  | 29  | 18 | -0.3 | 1.3 | -0.7 | 1.7 | 1.09E-01 | 5.00E-05 | 9.38E-01 | 2.85E-04 |
| Ednrb_chr14        | 2   | 1   | 3   | 1  | -0.1 | 1.1 | -1.6 | 3.0 | 7.44E-01 | 5.00E-05 | 1.00E+00 | 2.70E-04 |
| Efcc1_chr6         | 1   | 1   | 2   | 1  | 0.0  | 1.0 | -0.6 | 1.5 | 2.51E-01 | 1.60E-03 | 9.92E-01 | 6.43E-03 |
| Efnb2_chr8         | 3   | 4   | 7   | 4  | 0.2  | 1.1 | -0.8 | 1.7 | 5.14E-01 | 5.00E-05 | 1.00E+00 | 2.85E-04 |
| Ehbp1_chr11        | 2   | 2   | 3   | 2  | 0.0  | 1.0 | -0.6 | 1.5 | 9.88E-01 | 4.50E-04 | 1.00E+00 | 1.95E-03 |
| Ehd3_chr17         | 18  | 21  | 37  | 13 | 0.2  | 1.2 | -1.5 | 2.9 | 2.91E-01 | 5.00E-05 | 9.96E-01 | 2.85E-04 |
| Eif2ak3_chr6       | 14  | 16  | 28  | 16 | 0.2  | 1.2 | -0.8 | 1.7 | 3.05E-01 | 5.00E-05 | 9.96E-01 | 2.85E-04 |
| Elk3_chr10         | 14  | 17  | 25  | 17 | 0.2  | 1.2 | -0.6 | 1.5 | 2.68E-01 | 5.00E-05 | 9.94E-01 | 2.85E-04 |
| ElI3_chr2          | 28  | 31  | 37  | 17 | 0.1  | 1.1 | -1.1 | 2.2 | 5.82E-01 | 5.00E-05 | 1.00E+00 | 2.85E-04 |
| Eln_chr5           | 5   | 6   | 10  | 6  | 0.4  | 1.4 | -0.7 | 1.6 | 7.68E-02 | 5.00E-05 | 9.03E-01 | 2.85E-04 |
| Emid1_chr11        | 5   | 5   | 9   | 5  | 0.0  | 1.0 | -0.7 | 1.7 | 9.73E-01 | 5.00E-05 | 1.00E+00 | 2.85E-04 |
| Enah_chr1          | 1   | 1   | 2   | 2  | -0.2 | 1.2 | -0.7 | 1.6 | 3.48E-01 | 5.00E-04 | 1.00E+00 | 2.32E-03 |
| Enc1_chr13         | 5   | 5   | 10  | 7  | -0.1 | 1.1 | -0.6 | 1.5 | 7.16E-01 | 5.00E-05 | 1.00E+00 | 2.85E-04 |
| Enpp2_chr15        | 22  | 11  | 36  | 13 | -1.0 | 2.0 | -1.5 | 2.8 | 7.97E-06 | 5.00E-05 | 2.32E-03 | 2.97E-04 |
| Entpd5_chr12       | 6   | 7   | 11  | 6  | 0.3  | 1.2 | -0.9 | 1.8 | 4.34E-01 | 4.00E-04 | 9.94E-01 | 1.89E-03 |
| Epha2_chr4         | 2   | 2   | 5   | 3  | 0.2  | 1.1 | -0.6 | 1.6 | 6.56E-01 | 5.00E-05 | 1.00E+00 | 2.85E-04 |
| Epha3_chr16        | 1   | 1   | 2   | 1  | 0.0  | 1.0 | -1.2 | 2.3 | 9.48E-01 | 5.00E-05 | 1.00E+00 | 2.85E-04 |
| Ephb6_chr6         | 2   | 2   | 5   | 2  | -0.5 | 1.4 | -1.6 | 3.1 | 2.12E-01 | 5.00E-05 | 9.89E-01 | 2.85E-04 |
| Ephx1_chr1         | 36  | 49  | 59  | 35 | 0.4  | 1.3 | -0.8 | 1.7 | 4.70E-02 | 5.00E-05 | 8.39E-01 | 2.85E-04 |
| Epn2_chr11         | 5   | 5   | 10  | 6  | 0.0  | 1.0 | -0.6 | 1.5 | 9.31E-01 | 1.75E-04 | 1.00E+00 | 9.25E-04 |
| Erdr1_chrY         | 21  | 16  | 24  | 11 | -0.4 | 1.3 | -1.2 | 2.2 | 1.56E-01 | 5.00E-05 | 9.13E-01 | 2.85E-04 |
| Ero1lb_chr13       | 24  | 30  | 39  | 24 | 0.3  | 1.3 | -0.7 | 1.6 | 1.08E-01 | 5.00E-05 | 9.38E-01 | 2.85E-04 |
| Errfi1_chr4        | 15  | 11  | 25  | 13 | -0.5 | 1.4 | -1.0 | 2.0 | 4.14E-02 | 5.00E-05 | 6.94E-01 | 2.85E-04 |
| Esyt1_chr10        | 55  | 70  | 125 | 75 | 0.4  | 1.3 | -0.7 | 1.7 | 1.10E-01 | 5.00E-05 | 9.38E-01 | 2.85E-04 |
| Etv1_chr12         | 1   | 1   | 3   | 1  | -0.4 | 1.3 | -0.9 | 1.8 | 3.50E-01 | 5.00E-05 | 9.98E-01 | 2.85E-04 |
| Etv3_chr3          | 18  | 22  | 37  | 24 | 0.3  | 1.2 | -0.6 | 1.5 | 2.82E-01 | 6.72E-03 | 9.91E-01 | 1.99E-02 |
| Etv5_chr16         | 5   | 4   | 10  | 7  | -0.1 | 1.1 | -0.6 | 1.5 | 6.10E-01 | 5.00E-05 | 1.00E+00 | 2.85E-04 |
| Eya2_chr2          | 1   | 1   | 3   | 1  | -0.3 | 1.2 | -1.0 | 2.0 | 5.06E-01 | 5.00E-05 | 1.00E+00 | 2.85E-04 |
| Ezr_chr17          | 68  | 99  | 129 | 84 | 0.5  | 1.4 | -0.6 | 1.5 | 1.70E-02 | 1.50E-04 | 5.91E-01 | 7.89E-04 |
| F2r1_chr13         | 2   | 1   | 4   | 1  | -0.8 | 1.8 | -2.0 | 4.1 | 4.32E-02 | 5.00E-05 | 6.99E-01 | 2.85E-04 |
| Fam101b_chr11      | 13  | 13  | 20  | 12 | 0.1  | 1.0 | -0.7 | 1.6 | 7.90E-01 | 5.00E-05 | 1.00E+00 | 2.85E-04 |
| Fam102a_chr2       | 21  | 24  | 50  | 29 | 0.2  | 1.2 | -0.8 | 1.7 | 3.15E-01 | 5.00E-05 | 9.97E-01 | 2.85E-04 |
| Fam115a_chr6       | 2   | 2   | 4   | 3  | 0.1  | 1.1 | -0.6 | 1.6 | 7.42E-01 | 1.50E-04 | 1.00E+00 | 7.89E-04 |
| Fam134b_chr15      | 13  | 15  | 21  | 13 | 0.1  | 1.0 | -0.8 | 1.8 | 4.50E-01 | 3.18E-03 | 9.97E-01 | 1.14E-02 |
| Fam13a_chr6        | 2   | 1   | 3   | 1  | -0.5 | 1.4 | -1.3 | 2.4 | 2.33E-01 | 5.00E-05 | 9.91E-01 | 2.85E-04 |
| Fam149a_chr8       | 2   | 1   | 3   | 2  | -0.4 | 1.3 | -0.8 | 1.8 | 2.34E-01 | 5.00E-05 | 9.91E-01 | 2.85E-04 |
| Fam167b_chr4       | 4   | 3   | 4   | 2  | -0.6 | 1.5 | -0.8 | 1.8 | 1.85E-01 | 2.00E-04 | 9.86E-01 | 1.02E-03 |
| Fam169b_chr7       | 17  | 17  | 24  | 15 | 0.0  | 1.0 | -0.7 | 1.6 | 8.71E-01 | 5.00E-05 | 1.00E+00 | 2.85E-04 |
| Fam222a_chr5       | 1   | 1   | 2   | 1  | 0.1  | 1.1 | -1.0 | 2.0 | 5.12E-01 | 5.00E-05 | 1.00E+00 | 2.85E-04 |
| Fam26e_chr10       | 2   | 3   | 3   | 2  | 0.5  | 1.4 | -0.8 | 1.7 | 2.25E-01 | 5.00E-05 | 9.91E-01 | 2.85E-04 |
| Fam35a_chr14       | 5   | 4   | 7   | 5  | -0.2 | 1.2 | -0.6 | 1.6 | 3.75E-01 | 1.00E-04 | 1.00E+00 | 5.44E-04 |
| Fam65b_chr13       | 34  | 40  | 69  | 37 | 0.2  | 1.2 | -0.9 | 1.8 | 4.59E-01 | 4.36E-04 | 1.00E+00 | 1.99E-03 |
| Fam84b_chr15       | 4   | 4   | 5   | 3  | 0.0  | 1.0 | -0.8 | 1.8 | 9.10E-01 | 5.00E-05 | 1.00E+00 | 2.85E-04 |
| Fat1_chr8          | 1   | 1   | 2   | 1  | 0.0  | 1.0 | -0.7 | 1.6 | 9.65E-01 | 5.00E-05 | 1.00E+00 | 2.85E-04 |
| Fat4_chr3          | 1   | 1   | 2   | 1  | 0.0  | 1.0 | -0.6 | 1.5 | 3.02E-01 | 5.00E-05 | 9.86E-01 | 2.85E-04 |
| Fbln1_chr15        | 2   | 1   | 4   | 2  | -0.1 | 1.1 | -0.7 | 1.6 | 8.46E-01 | 5.00E-05 | 1.00E+00 | 2.85E-04 |
| Fbln5_chr12        | 9   | 14  | 16  | 9  | 0.7  | 1.6 | -0.8 | 1.8 | 1.68E-03 | 5.00E-05 | 1.77E-01 | 2.85E-04 |
| Fbxo21_chr5        | 5   | 6   | 11  | 7  | 0.2  | 1.2 | -0.6 | 1.6 | 3.50E-01 | 5.00E-05 | 9.98E-01 | 2.85E-04 |
| Fbxo32_chr15       | 4   | 4   | 7   | 4  | 0.2  | 1.1 | -0.8 | 1.8 | 4.81E-01 | 5.00E-05 | 1.00E+00 | 2.85E-04 |
| Fcamr_chr1         | 5   | 6   | 9   | 6  | 0.2  | 1.1 | -0.6 | 1.5 | 5.86E-01 | 1.00E-04 | 1.00E+00 | 5.44E-04 |
| Fcrl5_chr3         | 14  | 15  | 23  | 7  | 0.1  | 1.0 | -1.6 | 3.0 | 8.27E-01 | 5.00E-05 | 1.00E+00 | 2.85E-04 |
| Fcrla_chr1         | 36  | 42  | 17  | 5  | 0.2  | 1.1 | -1.8 | 3.5 | 5.24E-01 | 1.00E-04 | 1.00E+00 | 6.19E-04 |
| Fgf1_chr18         | 5   | 5   | 9   | 6  | 0.0  | 1.0 | -0.7 | 1.6 | 9.95E-01 | 5.00E-05 | 1.00E+00 | 2.85E-04 |
| Fgf13_chrX         | 1   | 1   | 3   | 2  | 0.1  | 1.1 | -0.8 | 1.8 | 8.57E-01 | 5.00E-05 | 1.00E+00 | 2.85E-04 |
| Fgf2_chr3          | 1   | 0   | 2   | 1  | 0.0  | 1.0 | -0.8 | 1.8 | 5.82E-01 | 4.45E-03 | 1.00E+00 | 1.57E-02 |
| Fhl1_chrX          | 8   | 8   | 12  | 8  | 0.0  | 1.0 | -0.6 | 1.5 | 8.87E-01 | 5.00E-05 | 1.00E+00 | 2.85E-04 |
| Fkbp9_chr6         | 9   | 9   | 17  | 11 | 0.0  | 1.0 | -0.6 | 1.5 | 8.86E-01 | 1.00E-04 | 1.00E+00 | 5.44E-04 |
| Fli1_chr9          | 33  | 39  | 63  | 41 | 0.2  | 1.2 | -0.6 | 1.5 | 2.53E-01 | 5.00E-05 | 9.92E-01 | 2.85E-04 |
| FmnI3_chr15        | 13  | 16  | 27  | 16 | 0.3  | 1.2 | -0.8 | 1.7 | 2.08E-01 | 5.00E-05 | 9.88E-01 | 2.85E-04 |
| Fnbp1l_chr3        | 3   | 3   | 5   | 3  | -0.3 | 1.2 | -0.7 | 1.6 | 2.60E-01 | 5.00E-05 | 9.93E-01 | 2.85E-04 |
| Foxk1_chr5         | 13  | 15  | 34  | 21 | 0.2  | 1.1 | -0.7 | 1.6 | 4.03E-01 | 5.00E-05 | 1.00E+00 | 2.85E-04 |
| Foxp1_chr6         | 13  | 16  | 24  | 12 | 0.3  | 1.3 | -1.0 | 2.0 | 4.08E-01 | 3.58E-03 | 9.93E-01 | 1.18E-02 |
| Fscn1_chr5         | 8   | 9   | 21  | 11 | 0.1  | 1.1 | -1.0 | 2.0 | 6.62E-01 | 5.00E-05 | 1.00E+00 | 2.85E-04 |
| Fut10_chr8         | 1   | 1   | 2   | 1  | 0.0  | 1.0 | -0.7 | 1.6 | 7.77E-01 | 1.00E-03 | 1.00E+00 | 3.75E-03 |
| Fv1_chr4           | 5   | 4   | 7   | 4  | -0.2 | 1.2 | -0.7 | 1.6 | 5.34E-01 | 3.00E-04 | 1.00E+00 | 1.47E-03 |
| Fxyd1_chr7         | 5   | 5   | 4   | 2  | 0.1  | 1.0 | -1.1 | 2.1 | 9.17E-01 | 1.38E-04 | 1.00E+00 | 7.40E-04 |
| Fxyd2_chr9         | 2   | 0   | 2   | 0  | -1.2 | 2.3 | -0.9 | 1.9 | 5.60E-03 | 1.99E-02 | 3.64E-01 | 5.61E-02 |
| Fxyd6_chr9         | 11  | 8   | 17  | 7  | -0.4 | 1.3 | -1.2 | 2.3 | 1.39E-01 | 5.00E-05 | 9.62E-01 | 2.85E-04 |
| G530011O06Rik_chrX | 1   | 1   | 2   | 0  | -0.3 | 1.3 | -0.8 | 1.8 | 7.12E-01 | 7.75E-03 | 1.00E+00 | 2.49E-02 |
| Gabrq_chrX         | 3   | 2   | 7   | 2  | -0.6 | 1.5 | -1.9 | 3.8 | 1.55E-01 | 5.00E-05 | 9.74E-01 | 2.85E-04 |
| Gadl1_chr4         | 1   | 1   | 2   | 1  | 0.0  | 1.0 | -0.7 | 1.7 | 5.41E-01 | 5.00E-05 | 1.00E+00 | 2.85E-04 |
| Gal3st2_chr1       | 1   | 0   | 2   | 0  | -0.2 | 1.2 | -0.9 | 1.9 | 2.25E-06 | 5.00E-05 | 8.87E-04 | 2.85E-04 |
| Galnt4_chr10       | 7   | 8   | 12  | 8  | 0.1  | 1.1 | -0.6 | 1.5 | 7.66E-01 | 9.50E-04 | 1.00E+00 | 4.09E-03 |
| Galnt6_chr15       | 10  | 11  | 20  | 12 | 0.1  | 1.1 | -0.7 | 1.6 | 6.75E-01 | 1.44E-02 | 1.00E+00 | 3.53E-02 |
| Gas1_chr13         | 2   | 3   | 4   | 2  | 0.3  | 1.2 | -0.8 | 1.7 | 4.22E-01 | 5.00E-05 | 1.00E+00 | 2.85E-04 |
| Gas6_chr8          | 20  | 23  | 43  | 23 | 0.2  | 1.1 | -0.9 | 1.8 | 3.61E-01 | 5.00E-05 | 9.98E-01 | 2.85E-04 |
| Gata3_chr2         | 2   | 2   | 3   | 2  | 0.3  | 1.3 | -0.6 | 1.6 | 3.34E-01 | 2.00E-04 | 9.98E-01 | 1.02E-03 |
| Gcsam_chr16        | 4   | 2   | 5   | 3  | -0.9 | 1.9 | -0.6 | 1.5 | 1.25E-02 | 7.50E-04 | 5.13E-01 | 3.39E-03 |
| Gimap3_chr6        | 118 | 131 | 158 | 96 | 0.2  | 1.1 | -0.7 | 1.6 | 4.98E-01 | 5.00E-05 | 1.00E+00 | 2.85E-04 |

|                  |     |     |     |     |      |     |      |     |          |          |          |          |
|------------------|-----|-----|-----|-----|------|-----|------|-----|----------|----------|----------|----------|
| Gimap5_chr6      | 28  | 29  | 39  | 25  | 0.1  | 1.0 | -0.7 | 1.6 | 7.74E-01 | 5.00E-05 | 1.00E+00 | 2.85E-04 |
| Gimap6_chr6      | 132 | 147 | 141 | 85  | 0.2  | 1.1 | -0.7 | 1.7 | 4.93E-01 | 5.00E-05 | 1.00E+00 | 2.85E-04 |
| Gimap8_chr6      | 62  | 62  | 75  | 46  | 0.1  | 1.1 | -0.7 | 1.6 | 6.67E-01 | 1.14E-02 | 1.00E+00 | 3.05E-02 |
| Gipc3_chr10      | 1   | 1   | 2   | 1   | 0.0  | 1.0 | -0.9 | 1.9 | 4.17E-01 | 4.50E-04 | 1.00E+00 | 2.12E-03 |
| Gja4_chr4        | 2   | 2   | 3   | 2   | -0.1 | 1.1 | -0.9 | 1.9 | 8.08E-01 | 5.00E-05 | 1.00E+00 | 2.85E-04 |
| Glb1_chr9        | 6   | 6   | 12  | 7   | -0.2 | 1.1 | -0.8 | 1.8 | 6.90E-01 | 1.43E-02 | 1.00E+00 | 4.23E-02 |
| Gltscr1_chr7     | 11  | 13  | 31  | 20  | 0.3  | 1.2 | -0.6 | 1.5 | 2.30E-01 | 5.00E-05 | 9.91E-01 | 2.85E-04 |
| Glyctk_chr9      | 2   | 2   | 4   | 2   | -0.1 | 1.1 | -0.8 | 1.8 | 7.33E-01 | 3.29E-03 | 1.00E+00 | 1.11E-02 |
| Gm11346_chr13    | 7   | 8   | 9   | 5   | 0.2  | 1.1 | -0.9 | 1.8 | 5.81E-01 | 5.00E-05 | 1.00E+00 | 2.82E-04 |
| Gm13139_chr4     | 5   | 1   | 5   | 1   | -2.4 | 5.4 | -1.8 | 3.6 | 1.32E-05 | 5.00E-05 | 3.55E-03 | 2.85E-04 |
| Gm13152_chr4     | 2   | 0   | 3   | 1   | -1.1 | 2.1 | -1.6 | 3.1 | 2.67E-06 | 5.00E-05 | 1.02E-03 | 2.85E-04 |
| Gm13238_chr4     | 2   | 0   | 2   | 1   | -0.6 | 1.5 | -1.1 | 2.2 | 1.38E-03 | 1.50E-04 | 1.50E-01 | 7.82E-04 |
| Gm13251_chr4     | 4   | 1   | 5   | 1   | -1.8 | 3.4 | -1.8 | 3.6 | 1.30E-03 | 5.00E-05 | 1.31E-01 | 2.49E-04 |
| Gm13889_chr2     | 1   | 2   | 2   | 1   | 1.0  | 1.9 | -0.7 | 1.6 | 5.55E-02 | 5.50E-03 | 8.56E-01 | 1.89E-02 |
| Gm19897_chr7     | 3   | 4   | 4   | 1   | 0.2  | 1.2 | -1.6 | 3.1 | 6.80E-01 | 1.84E-02 | 1.00E+00 | 5.16E-02 |
| Gm3002_chr14     | 6   | 3   | 9   | 5   | -1.2 | 2.3 | -0.7 | 1.6 | 8.15E-06 | 5.00E-05 | 2.25E-03 | 2.82E-04 |
| Gm4759_chr7      | 20  | 14  | 40  | 19  | -0.5 | 1.4 | -1.1 | 2.1 | 1.74E-02 | 5.00E-05 | 4.91E-01 | 2.82E-04 |
| Gm7120_chr13     | 5   | 4   | 10  | 3   | -0.2 | 1.1 | -1.7 | 3.3 | 7.33E-01 | 5.00E-05 | 1.00E+00 | 2.85E-04 |
| Gpatch11_chr17   | 7   | 7   | 10  | 5   | 0.1  | 1.1 | -1.0 | 2.0 | 7.27E-01 | 5.00E-05 | 1.00E+00 | 2.85E-04 |
| Gpc3_chrX        | 2   | 3   | 3   | 1   | 0.8  | 1.7 | -1.3 | 2.5 | 4.02E-02 | 5.00E-05 | 8.02E-01 | 2.85E-04 |
| Gpr125_chr5      | 2   | 1   | 3   | 2   | -0.1 | 1.1 | -0.6 | 1.5 | 7.46E-01 | 2.00E-04 | 1.00E+00 | 1.02E-03 |
| Gpr132_chr12     | 21  | 27  | 37  | 24  | 0.4  | 1.3 | -0.6 | 1.6 | 9.31E-02 | 5.00E-05 | 9.27E-01 | 2.85E-04 |
| Gpr137b-ps_chr13 | 10  | 8   | 17  | 3   | -0.2 | 1.2 | -2.7 | 6.3 | 3.95E-01 | 5.00E-05 | 1.00E+00 | 2.82E-04 |
| Gpr153_chr4      | 2   | 2   | 5   | 4   | -0.1 | 1.1 | -0.6 | 1.5 | 8.14E-01 | 2.50E-04 | 1.00E+00 | 1.25E-03 |
| Gpr156_chr16     | 1   | 1   | 3   | 1   | -0.2 | 1.2 | -1.5 | 2.8 | 5.29E-01 | 5.00E-05 | 1.00E+00 | 2.85E-04 |
| Gpr176_chr2      | 1   | 1   | 2   | 1   | 0.0  | 1.0 | -0.8 | 1.8 | 8.24E-01 | 5.00E-05 | 1.00E+00 | 2.85E-04 |
| Gpr18_chr14      | 27  | 40  | 36  | 21  | 0.5  | 1.5 | -0.8 | 1.7 | 1.28E-01 | 9.10E-03 | 9.54E-01 | 2.89E-02 |
| Gpr183_chr14     | 11  | 19  | 17  | 10  | 0.7  | 1.6 | -0.8 | 1.8 | 5.08E-02 | 6.60E-03 | 8.48E-01 | 2.20E-02 |
| Gpr4_chr7        | 1   | 1   | 3   | 1   | -0.2 | 1.2 | -1.2 | 2.3 | 5.91E-01 | 5.00E-05 | 1.00E+00 | 2.85E-04 |
| Gpr68_chr12      | 2   | 3   | 5   | 3   | 0.2  | 1.2 | -0.6 | 1.5 | 5.65E-01 | 1.82E-02 | 1.00E+00 | 4.89E-02 |
| Gprin3_chr6      | 1   | 1   | 4   | 2   | -0.4 | 1.3 | -0.7 | 1.6 | 3.31E-01 | 2.50E-04 | 9.90E-01 | 1.25E-03 |
| Gpsm1_chr2       | 3   | 3   | 5   | 3   | 0.2  | 1.1 | -0.7 | 1.6 | 6.63E-01 | 7.44E-03 | 1.00E+00 | 2.46E-02 |
| Grap2_chr15      | 43  | 46  | 73  | 45  | 0.1  | 1.1 | -0.7 | 1.6 | 6.82E-01 | 5.00E-05 | 1.00E+00 | 2.85E-04 |
| Grem2_chr1       | 1   | 1   | 2   | 1   | -0.2 | 1.2 | -1.1 | 2.1 | 5.04E-01 | 5.00E-05 | 1.00E+00 | 2.85E-04 |
| Gstm2_chr3       | 5   | 6   | 5   | 3   | 0.4  | 1.3 | -0.8 | 1.7 | 3.46E-01 | 5.00E-05 | 9.98E-01 | 2.85E-04 |
| Gucy1a3_chr3     | 11  | 14  | 21  | 13  | 0.3  | 1.2 | -0.7 | 1.6 | 2.17E-01 | 5.00E-05 | 9.89E-01 | 2.85E-04 |
| Gxylt1_chr15     | 15  | 13  | 25  | 14  | -0.2 | 1.2 | -0.8 | 1.7 | 2.55E-01 | 5.00E-05 | 9.92E-01 | 2.85E-04 |
| H2-Eb1_chr17     | 393 | 620 | 522 | 348 | 0.7  | 1.6 | -0.6 | 1.5 | 3.44E-02 | 1.90E-03 | 7.66E-01 | 7.48E-03 |
| H2-M2_chr17      | 5   | 5   | 6   | 2   | 0.2  | 1.1 | -1.7 | 3.2 | 5.84E-01 | 5.00E-05 | 1.00E+00 | 2.85E-04 |
| Hao_chr17        | 18  | 21  | 23  | 14  | 0.2  | 1.2 | -0.7 | 1.6 | 4.01E-01 | 5.00E-05 | 1.00E+00 | 2.85E-04 |
| Hba-a2_chr11     | 224 | 437 | 231 | 76  | 0.9  | 1.9 | -1.6 | 3.0 | 4.07E-01 | 5.00E-05 | 6.22E-01 | 2.92E-04 |
| Heatr5b_chr17    | 6   | 7   | 14  | 9   | 0.2  | 1.1 | -0.6 | 1.5 | 4.64E-01 | 5.00E-05 | 1.00E+00 | 2.85E-04 |
| Heg1_chr16       | 13  | 13  | 36  | 24  | 0.0  | 1.0 | -0.6 | 1.5 | 9.16E-01 | 5.00E-05 | 1.00E+00 | 2.85E-04 |
| Herc3_chr6       | 15  | 14  | 25  | 14  | -0.1 | 1.1 | -0.8 | 1.7 | 6.13E-01 | 5.00E-05 | 1.00E+00 | 2.85E-04 |
| Hes5_chr4        | 2   | 2   | 2   | 1   | 0.2  | 1.1 | -1.0 | 2.0 | 7.32E-01 | 1.50E-04 | 1.00E+00 | 7.89E-04 |
| Heyl_chr4        | 1   | 1   | 2   | 1   | 0.0  | 1.0 | -0.9 | 1.9 | 8.16E-01 | 5.00E-05 | 1.00E+00 | 2.85E-04 |
| Hhat_chr1        | 1   | 1   | 2   | 1   | 0.3  | 1.2 | -1.0 | 2.0 | 5.39E-01 | 5.00E-05 | 1.00E+00 | 2.85E-04 |
| Hip1r_chr5       | 34  | 39  | 73  | 45  | 0.2  | 1.2 | -0.7 | 1.6 | 3.22E-01 | 1.00E-04 | 9.97E-01 | 5.44E-04 |
| Hlf_chr11        | 2   | 0   | 3   | 1   | -0.7 | 1.7 | -1.4 | 2.7 | 3.37E-07 | 5.00E-05 | 1.76E-04 | 2.85E-04 |
| Hs3st1_chr5      | 4   | 5   | 8   | 3   | 0.4  | 1.3 | -1.5 | 2.8 | 2.47E-01 | 5.00E-05 | 9.92E-01 | 2.85E-04 |
| Hs3st3b1_chr11   | 3   | 3   | 5   | 3   | 0.0  | 1.0 | -0.6 | 1.6 | 9.92E-01 | 5.00E-05 | 1.00E+00 | 2.85E-04 |
| Hsd17b7_chr1     | 3   | 2   | 5   | 2   | -0.1 | 1.1 | -1.3 | 2.5 | 6.26E-01 | 5.00E-05 | 1.00E+00 | 2.85E-04 |
| Hspb1_chr5       | 2   | 2   | 2   | 1   | 0.3  | 1.3 | -0.8 | 1.7 | 5.28E-01 | 3.40E-03 | 1.00E+00 | 1.24E-02 |
| Hspb7_chr4       | 1   | 1   | 2   | 1   | -0.5 | 1.5 | -1.1 | 2.2 | 8.37E-03 | 5.00E-05 | 4.40E-01 | 2.85E-04 |
| Htra1_chr7       | 10  | 13  | 18  | 11  | 0.3  | 1.2 | -0.7 | 1.7 | 2.40E-01 | 5.00E-05 | 9.92E-01 | 2.85E-04 |
| Icosl_chr10      | 63  | 73  | 100 | 63  | 0.2  | 1.2 | -0.7 | 1.6 | 3.03E-01 | 2.00E-04 | 9.96E-01 | 1.02E-03 |
| Ifi202b_chr1     | 7   | 2   | 8   | 0   | -1.5 | 2.9 | -3.0 | 7.9 | 3.84E-04 | 3.96E-02 | 4.30E-02 | 9.56E-02 |
| Ifi30_chr8       | 141 | 138 | 175 | 93  | 0.0  | 1.0 | -0.9 | 1.9 | 8.59E-01 | 5.00E-05 | 1.00E+00 | 2.85E-04 |
| Ift172_chr5      | 7   | 6   | 13  | 9   | 0.0  | 1.0 | -0.6 | 1.6 | 8.41E-01 | 5.00E-05 | 1.00E+00 | 2.85E-04 |
| Ift81_chr5       | 1   | 1   | 2   | 1   | -0.1 | 1.1 | -0.9 | 1.8 | 8.41E-01 | 5.00E-05 | 1.00E+00 | 2.85E-04 |
| Igf2_chr7        | 2   | 2   | 2   | 1   | 0.3  | 1.3 | -1.1 | 2.2 | 4.04E-01 | 5.00E-05 | 1.00E+00 | 2.85E-04 |
| Igfbp3_chr11     | 66  | 69  | 106 | 28  | 0.1  | 1.0 | -1.9 | 3.8 | 7.66E-01 | 5.00E-05 | 1.00E+00 | 2.85E-04 |
| Igfbp5_chr1      | 8   | 7   | 18  | 4   | -0.1 | 1.1 | -2.2 | 4.6 | 6.18E-01 | 5.00E-05 | 1.00E+00 | 2.85E-04 |
| Ii16_chr7        | 41  | 51  | 67  | 42  | 0.3  | 1.3 | -0.7 | 1.6 | 1.40E-01 | 5.00E-05 | 9.63E-01 | 2.85E-04 |
| Ii27ra_chr8      | 20  | 21  | 35  | 21  | 0.1  | 1.1 | -0.7 | 1.6 | 7.41E-01 | 5.00E-05 | 1.00E+00 | 2.85E-04 |
| Ii34_chr8        | 5   | 6   | 8   | 5   | 0.4  | 1.3 | -0.8 | 1.7 | 2.90E-01 | 5.00E-05 | 9.94E-01 | 2.85E-04 |
| Ii4i1_chr7       | 26  | 23  | 42  | 22  | -0.1 | 1.1 | -0.9 | 1.9 | 6.57E-01 | 2.03E-02 | 1.00E+00 | 5.67E-02 |
| Ii7r_chr15       | 28  | 22  | 42  | 24  | -0.3 | 1.3 | -0.8 | 1.7 | 1.15E-01 | 5.00E-05 | 8.62E-01 | 2.85E-04 |
| Inadl_chr4       | 3   | 4   | 6   | 3   | 0.4  | 1.3 | -1.1 | 2.1 | 2.00E-01 | 5.00E-05 | 9.92E-01 | 2.85E-04 |
| Inpp4b_chr8      | 9   | 6   | 21  | 10  | -0.5 | 1.4 | -1.1 | 2.1 | 3.65E-02 | 5.00E-05 | 6.59E-01 | 2.85E-04 |
| Inpp11_chr7      | 12  | 12  | 28  | 13  | 0.0  | 1.0 | -1.1 | 2.2 | 9.17E-01 | 5.00E-05 | 1.00E+00 | 2.85E-04 |
| Irak3_chr10      | 6   | 9   | 12  | 7   | 0.4  | 1.3 | -0.8 | 1.7 | 1.02E-01 | 5.00E-05 | 9.38E-01 | 2.85E-04 |
| Irf5_chr6        | 26  | 36  | 45  | 32  | 0.4  | 1.3 | -0.6 | 1.6 | 3.49E-01 | 1.20E-02 | 8.32E-01 | 3.69E-02 |
| Irf6_chr1        | 1   | 1   | 2   | 1   | 0.1  | 1.1 | -0.7 | 1.6 | 6.12E-01 | 1.50E-04 | 1.00E+00 | 7.89E-04 |
| Irgq_chr7        | 6   | 7   | 13  | 9   | 0.2  | 1.1 | -0.6 | 1.5 | 4.06E-01 | 1.50E-04 | 1.00E+00 | 7.89E-04 |
| Irs1_chr1        | 1   | 1   | 2   | 1   | 0.0  | 1.0 | -0.6 | 1.5 | 9.71E-01 | 2.00E-04 | 1.00E+00 | 1.02E-03 |
| Islr_chr9        | 2   | 2   | 4   | 2   | 0.0  | 1.0 | -1.0 | 2.0 | 8.87E-01 | 5.87E-03 | 1.00E+00 | 1.77E-02 |
| Itga1_chr13      | 10  | 10  | 22  | 14  | -0.1 | 1.1 | -0.6 | 1.5 | 6.49E-01 | 2.00E-04 | 1.00E+00 | 1.02E-03 |
| Itga11_chr9      | 1   | 1   | 2   | 1   | 0.0  | 1.0 | -0.8 | 1.8 | 4.58E-01 | 5.00E-05 | 1.00E+00 | 2.85E-04 |
| Itga3_chr11      | 2   | 3   | 5   | 3   | 0.4  | 1.3 | -0.8 | 1.8 | 1.99E-01 | 5.00E-05 | 9.87E-01 | 2.85E-04 |
| Itga7_chr10      | 1   | 1   | 2   | 1   | 0.0  | 1.0 | -0.7 | 1.6 | 4.15E-01 | 3.50E-04 | 1.00E+00 | 1.69E-03 |
| Itgbl1_chr14     | 1   | 1   | 2   | 1   | -0.2 | 1.2 | -0.8 | 1.7 | 4.70E-01 | 2.00E-04 | 1.00E+00 | 1.02E-03 |
| Ith5_chr2        | 3   | 3   | 6   | 3   | -0.2 | 1.1 | -1.1 | 2.2 | 5.09E-01 | 5.00E-05 | 1.00E+00 | 2.85E-04 |

|               |     |     |     |    |      |     |      |     |          |          |          |          |
|---------------|-----|-----|-----|----|------|-----|------|-----|----------|----------|----------|----------|
| Itln1_chr1    | 1   | 1   | 2   | 0  | -0.4 | 1.3 | -0.8 | 1.8 | 1.27E-01 | 5.00E-05 | 8.77E-01 | 2.85E-04 |
| Itm2a_chrX    | 10  | 7   | 10  | 7  | -0.4 | 1.3 | -0.7 | 1.6 | 1.59E-01 | 5.00E-05 | 9.78E-01 | 2.85E-04 |
| Itpkb_chr1    | 21  | 22  | 50  | 30 | 0.1  | 1.1 | -0.7 | 1.7 | 6.57E-01 | 5.00E-05 | 1.00E+00 | 2.85E-04 |
| Itpr2_chr6    | 14  | 15  | 34  | 19 | 0.1  | 1.1 | -0.8 | 1.8 | 6.74E-01 | 5.00E-05 | 1.00E+00 | 2.85E-04 |
| Jag2_chr12    | 1   | 1   | 3   | 2  | 0.0  | 1.0 | -0.7 | 1.6 | 9.23E-01 | 2.00E-04 | 1.00E+00 | 1.02E-03 |
| Jam3_chr9     | 6   | 6   | 9   | 5  | -0.1 | 1.1 | -0.9 | 1.9 | 6.76E-01 | 5.00E-05 | 1.00E+00 | 2.85E-04 |
| Kat6b_chr14   | 5   | 4   | 8   | 5  | -0.1 | 1.1 | -0.7 | 1.6 | 6.48E-01 | 3.27E-02 | 1.00E+00 | 8.11E-02 |
| Kbtbd11_chr8  | 33  | 32  | 54  | 34 | -0.1 | 1.0 | -0.7 | 1.6 | 7.51E-01 | 2.00E-04 | 1.00E+00 | 1.02E-03 |
| Kcnc3_chr7    | 2   | 2   | 3   | 1  | 0.0  | 1.0 | -1.0 | 2.0 | 9.04E-01 | 5.00E-05 | 1.00E+00 | 2.85E-04 |
| Kcnk3_chr5    | 1   | 1   | 2   | 1  | 0.0  | 1.0 | -1.2 | 2.2 | 8.49E-01 | 5.00E-05 | 1.00E+00 | 2.85E-04 |
| Kcnk5_chr14   | 5   | 8   | 11  | 7  | 0.5  | 1.5 | -0.6 | 1.5 | 2.76E-02 | 1.00E-04 | 7.14E-01 | 5.44E-04 |
| Kctd15_chr7   | 2   | 2   | 3   | 2  | 0.4  | 1.3 | -0.7 | 1.6 | 3.62E-01 | 3.50E-04 | 9.99E-01 | 1.69E-03 |
| Kdm5b_chr1    | 7   | 8   | 14  | 9  | 0.2  | 1.2 | -0.6 | 1.5 | 3.19E-01 | 2.50E-04 | 9.88E-01 | 1.25E-03 |
| Kif21b_chr1   | 42  | 40  | 98  | 43 | -0.1 | 1.1 | -1.2 | 2.3 | 7.41E-01 | 5.00E-05 | 1.00E+00 | 2.85E-04 |
| Kif3c_chr12   | 2   | 2   | 4   | 3  | 0.3  | 1.2 | -0.7 | 1.6 | 3.98E-01 | 2.00E-03 | 1.00E+00 | 7.82E-03 |
| Klf12_chr14   | 3   | 2   | 6   | 2  | -0.4 | 1.4 | -1.6 | 3.0 | 1.41E-01 | 5.00E-05 | 8.94E-01 | 2.85E-04 |
| Klf2_chr8     | 22  | 36  | 33  | 21 | 0.7  | 1.7 | -0.6 | 1.6 | 8.59E-04 | 5.00E-05 | 1.12E-01 | 2.85E-04 |
| Klhl13_chrX   | 2   | 3   | 4   | 3  | 0.4  | 1.3 | -0.6 | 1.6 | 2.36E-01 | 2.50E-04 | 9.91E-01 | 1.25E-03 |
| Klhl24_chr16  | 30  | 26  | 58  | 37 | -0.2 | 1.2 | -0.6 | 1.6 | 2.70E-01 | 1.00E-04 | 9.94E-01 | 5.44E-04 |
| Klhl42_chr6   | 8   | 8   | 15  | 10 | 0.0  | 1.0 | -0.7 | 1.6 | 9.04E-01 | 5.00E-05 | 1.00E+00 | 2.85E-04 |
| Klhl6_chr16   | 44  | 45  | 63  | 38 | 0.0  | 1.0 | -0.7 | 1.6 | 8.70E-01 | 5.00E-05 | 1.00E+00 | 2.85E-04 |
| Klk1b22_chr7  | 6   | 6   | 6   | 0  | 0.0  | 1.0 | -2.6 | 6.0 | 9.15E-01 | 5.00E-05 | 1.00E+00 | 2.85E-04 |
| Klri1_chr6    | 4   | 2   | 5   | 2  | -1.2 | 2.3 | -1.1 | 2.1 | 1.69E-02 | 5.00E-05 | 5.91E-01 | 2.85E-04 |
| Kremen1_chr11 | 5   | 6   | 12  | 8  | 0.1  | 1.1 | -0.6 | 1.6 | 7.05E-01 | 5.00E-05 | 1.00E+00 | 2.85E-04 |
| Kynu_chr2     | 11  | 12  | 13  | 8  | 0.2  | 1.1 | -0.6 | 1.5 | 4.67E-01 | 3.50E-04 | 1.00E+00 | 1.69E-03 |
| L3mbtl3_chr10 | 10  | 11  | 22  | 12 | 0.1  | 1.1 | -0.8 | 1.8 | 5.13E-01 | 5.00E-05 | 1.00E+00 | 2.85E-04 |
| Lama4_chr10   | 1   | 1   | 2   | 1  | 0.0  | 1.0 | -0.9 | 1.9 | 7.59E-01 | 5.00E-05 | 1.00E+00 | 2.85E-04 |
| Lama5_chr2    | 1   | 1   | 3   | 2  | 0.0  | 1.0 | -0.8 | 1.8 | 8.30E-01 | 5.00E-05 | 1.00E+00 | 2.85E-04 |
| Lamb1_chr12   | 1   | 1   | 3   | 1  | 0.0  | 1.0 | -0.9 | 1.9 | 9.49E-01 | 5.00E-05 | 1.00E+00 | 2.85E-04 |
| Lamb2_chr9    | 6   | 9   | 17  | 10 | 0.5  | 1.4 | -0.7 | 1.6 | 1.84E-02 | 5.00E-05 | 6.02E-01 | 2.85E-04 |
| Lamb3_chr1    | 1   | 1   | 2   | 1  | 0.0  | 1.0 | -0.9 | 1.9 | 5.65E-01 | 5.00E-05 | 1.00E+00 | 2.85E-04 |
| Lamc1_chr1    | 5   | 6   | 13  | 8  | 0.4  | 1.3 | -0.7 | 1.6 | 1.02E-01 | 5.00E-05 | 8.50E-01 | 2.85E-04 |
| Lamc3_chr2    | 1   | 1   | 2   | 1  | 0.0  | 1.0 | -0.6 | 1.6 | 4.73E-01 | 2.50E-04 | 1.00E+00 | 1.25E-03 |
| Lanc11_chr1   | 3   | 3   | 4   | 3  | -0.1 | 1.1 | -0.7 | 1.6 | 7.54E-01 | 1.58E-02 | 1.00E+00 | 3.89E-02 |
| Lat_chr7      | 28  | 27  | 33  | 20 | -0.1 | 1.1 | -0.7 | 1.6 | 6.81E-01 | 5.00E-05 | 1.00E+00 | 2.85E-04 |
| Lbh_chr17     | 74  | 102 | 108 | 66 | 0.5  | 1.4 | -0.7 | 1.6 | 3.66E-02 | 5.00E-05 | 7.72E-01 | 2.85E-04 |
| Lca5_chr9     | 2   | 2   | 3   | 2  | -0.1 | 1.0 | -0.7 | 1.6 | 8.72E-01 | 1.63E-04 | 1.00E+00 | 8.62E-04 |
| Ldhd_chr6     | 5   | 3   | 5   | 2  | -0.8 | 1.7 | -1.3 | 2.4 | 6.94E-02 | 5.00E-05 | 8.81E-01 | 2.85E-04 |
| Ldlrad3_chr2  | 4   | 4   | 7   | 4  | 0.0  | 1.0 | -0.9 | 1.9 | 9.26E-01 | 5.00E-05 | 1.00E+00 | 2.85E-04 |
| Ldlrad4_chr18 | 3   | 3   | 8   | 5  | -0.2 | 1.2 | -0.6 | 1.6 | 5.43E-01 | 2.00E-04 | 1.00E+00 | 1.02E-03 |
| Lepr_chr4     | 10  | 9   | 19  | 9  | -0.1 | 1.1 | -1.1 | 2.2 | 6.44E-01 | 5.00E-05 | 1.00E+00 | 2.85E-04 |
| Leprel1_chr16 | 8   | 10  | 21  | 13 | 0.3  | 1.2 | -0.7 | 1.6 | 2.77E-01 | 5.00E-05 | 9.76E-01 | 2.85E-04 |
| Lgr4_chr2     | 1   | 1   | 2   | 1  | 0.0  | 1.0 | -0.6 | 1.5 | 2.54E-01 | 6.50E-04 | 9.92E-01 | 2.93E-03 |
| Limd1_chr9    | 33  | 36  | 71  | 46 | 0.1  | 1.1 | -0.6 | 1.5 | 5.28E-01 | 5.00E-05 | 1.00E+00 | 2.85E-04 |
| Limd2_chr11   | 64  | 75  | 82  | 51 | 0.2  | 1.2 | -0.7 | 1.6 | 2.97E-01 | 5.00E-05 | 9.96E-01 | 2.85E-04 |
| Lims2_chr18   | 2   | 2   | 3   | 1  | 0.0  | 1.0 | -1.0 | 1.9 | 9.73E-01 | 1.00E-04 | 1.00E+00 | 5.44E-04 |
| Lipc_chr9     | 2   | 2   | 3   | 1  | 0.0  | 1.0 | -1.4 | 2.7 | 9.76E-01 | 5.00E-05 | 1.00E+00 | 2.85E-04 |
| Lipn_chr19    | 6   | 2   | 8   | 1  | -1.5 | 2.8 | -2.9 | 7.5 | 3.33E-04 | 5.00E-05 | 5.65E-02 | 2.85E-04 |
| Lix1l_chr3    | 5   | 5   | 9   | 6  | 0.0  | 1.0 | -0.6 | 1.5 | 8.66E-01 | 5.00E-05 | 1.00E+00 | 2.85E-04 |
| Lmod1_chr1    | 1   | 1   | 2   | 1  | 0.1  | 1.1 | -0.7 | 1.6 | 5.71E-01 | 5.00E-05 | 1.00E+00 | 2.85E-04 |
| Lpar1_chr4    | 6   | 4   | 7   | 5  | -0.5 | 1.4 | -0.6 | 1.5 | 1.34E-01 | 1.26E-02 | 9.33E-01 | 3.72E-02 |
| Lpgat1_chr1   | 17  | 17  | 21  | 13 | 0.0  | 1.0 | -0.8 | 1.7 | 8.49E-01 | 2.67E-02 | 1.00E+00 | 6.37E-02 |
| Lrat_chr3     | 2   | 0   | 3   | 2  | -1.0 | 2.0 | -1.1 | 2.2 | 5.57E-07 | 5.00E-05 | 2.79E-04 | 2.85E-04 |
| Lrch1_chr14   | 9   | 10  | 17  | 10 | 0.1  | 1.0 | -0.8 | 1.7 | 7.10E-01 | 8.67E-04 | 1.00E+00 | 3.86E-03 |
| Lrrc1_chr9    | 2   | 2   | 4   | 3  | 0.0  | 1.0 | -0.7 | 1.6 | 9.31E-01 | 4.75E-04 | 1.00E+00 | 2.25E-03 |
| Lrrc61_chr6   | 6   | 9   | 11  | 7  | 0.4  | 1.4 | -0.6 | 1.5 | 2.11E-01 | 3.22E-02 | 9.62E-01 | 6.63E-02 |
| Lrrc75b_chr10 | 1   | 1   | 2   | 1  | 0.0  | 1.0 | -0.8 | 1.7 | 5.84E-01 | 5.00E-05 | 1.00E+00 | 2.85E-04 |
| Lrrk2_chr15   | 25  | 28  | 50  | 33 | 0.2  | 1.1 | -0.6 | 1.5 | 4.46E-01 | 4.00E-04 | 1.00E+00 | 1.91E-03 |
| Lrrn4_chr2    | 1   | 1   | 2   | 1  | 0.4  | 1.4 | -0.8 | 1.7 | 1.73E-01 | 5.00E-05 | 9.82E-01 | 2.85E-04 |
| Ltbp1_chr17   | 1   | 1   | 2   | 2  | -0.1 | 1.1 | -0.6 | 1.5 | 7.86E-01 | 6.00E-03 | 1.00E+00 | 2.04E-02 |
| Ltbp3_chr19   | 3   | 3   | 8   | 5  | 0.3  | 1.3 | -0.6 | 1.5 | 3.92E-01 | 2.46E-02 | 1.00E+00 | 6.68E-02 |
| Ltbp4_chr7    | 20  | 28  | 70  | 44 | 0.5  | 1.4 | -0.7 | 1.6 | 2.20E-02 | 1.50E-04 | 5.43E-01 | 7.89E-04 |
| Lurap1l_chr4  | 2   | 1   | 3   | 1  | -0.6 | 1.6 | -1.0 | 2.0 | 1.70E-01 | 5.00E-05 | 9.80E-01 | 2.85E-04 |
| Ly75_chr2     | 5   | 5   | 13  | 9  | -0.1 | 1.1 | -0.6 | 1.5 | 5.49E-01 | 5.00E-05 | 1.00E+00 | 2.85E-04 |
| Ly86_chr13    | 108 | 109 | 78  | 51 | 0.0  | 1.0 | -0.6 | 1.5 | 9.67E-01 | 5.00E-05 | 1.00E+00 | 2.85E-04 |
| Mab21l3_chr3  | 1   | 1   | 2   | 1  | 0.0  | 1.0 | -0.7 | 1.6 | 1.46E-01 | 5.00E-05 | 9.68E-01 | 2.85E-04 |
| Madcaml_chr10 | 2   | 0   | 2   | 1  | -0.9 | 1.8 | -1.1 | 2.2 | 8.09E-06 | 5.00E-05 | 2.37E-03 | 2.85E-04 |
| Malt1_chr18   | 51  | 52  | 78  | 51 | 0.0  | 1.0 | -0.6 | 1.6 | 9.14E-01 | 1.00E-04 | 1.00E+00 | 5.44E-04 |
| Maml2_chr9    | 9   | 9   | 16  | 8  | 0.1  | 1.1 | -1.1 | 2.1 | 6.29E-01 | 5.00E-05 | 1.00E+00 | 2.85E-04 |
| Maml3_chr3    | 2   | 2   | 4   | 3  | 0.1  | 1.1 | -0.6 | 1.5 | 6.30E-01 | 1.00E-04 | 1.00E+00 | 5.44E-04 |
| Maml1d1_chrX  | 2   | 2   | 3   | 1  | -0.1 | 1.0 | -1.1 | 2.1 | 9.05E-01 | 1.17E-03 | 1.00E+00 | 4.64E-03 |
| Manba_chr3    | 7   | 8   | 13  | 7  | 0.1  | 1.1 | -0.8 | 1.7 | 6.89E-01 | 5.00E-05 | 1.00E+00 | 2.85E-04 |
| Map2_chr1     | 1   | 1   | 2   | 1  | 0.0  | 1.0 | -0.6 | 1.5 | 1.34E-01 | 5.00E-05 | 9.56E-01 | 2.85E-04 |
| Map2k6_chr11  | 6   | 6   | 9   | 6  | 0.0  | 1.0 | -0.7 | 1.6 | 9.42E-01 | 5.00E-05 | 1.00E+00 | 2.85E-04 |
| Map3k14_chr11 | 13  | 16  | 31  | 19 | 0.3  | 1.2 | -0.8 | 1.7 | 1.78E-01 | 5.00E-05 | 9.84E-01 | 2.85E-04 |
| Map3k5_chr10  | 12  | 14  | 25  | 16 | 0.2  | 1.1 | -0.6 | 1.6 | 3.98E-01 | 5.00E-05 | 1.00E+00 | 2.85E-04 |
| Map4k1_chr7   | 57  | 71  | 110 | 59 | 0.3  | 1.2 | -0.9 | 1.9 | 1.59E-01 | 5.00E-05 | 9.77E-01 | 2.85E-04 |
| Map4k2_chr19  | 74  | 76  | 138 | 83 | 0.0  | 1.0 | -0.7 | 1.7 | 8.24E-01 | 5.00E-05 | 1.00E+00 | 2.85E-04 |
| Mapk12_chr15  | 4   | 6   | 5   | 3  | 0.8  | 1.7 | -0.6 | 1.6 | 1.95E-02 | 2.50E-04 | 6.24E-01 | 1.25E-03 |
| Mapk8ip1_chr2 | 1   | 1   | 2   | 1  | -0.1 | 1.1 | -0.7 | 1.6 | 5.79E-01 | 8.29E-03 | 1.00E+00 | 2.66E-02 |
| Marco_chr1    | 49  | 35  | 59  | 30 | -0.5 | 1.4 | -1.0 | 1.9 | 2.61E-02 | 5.00E-05 | 5.87E-01 | 2.85E-04 |
| Mark1_chr1    | 1   | 1   | 2   | 1  | 0.0  | 1.0 | -1.3 | 2.4 | 9.52E-01 | 5.00E-05 | 1.00E+00 | 2.85E-04 |
| Mctp2_chr7    | 5   | 4   | 8   | 5  | -0.2 | 1.1 | -0.6 | 1.5 | 4.10E-01 | 5.00E-05 | 1.00E+00 | 2.85E-04 |



|               |    |    |     |    |      |     |      |      |          |          |          |          |
|---------------|----|----|-----|----|------|-----|------|------|----------|----------|----------|----------|
| Mcur1_chr13   | 9  | 9  | 16  | 10 | 0.1  | 1.0 | -0.6 | 1.6  | 8.12E-01 | 5.00E-05 | 1.00E+00 | 2.85E-04 |
| Mef2d_chr3    | 31 | 36 | 76  | 51 | 0.2  | 1.2 | -0.6 | 1.5  | 2.90E-01 | 1.00E-04 | 9.82E-01 | 5.44E-04 |
| Meis2_chr2    | 1  | 1  | 2   | 1  | 0.0  | 1.0 | -0.7 | 1.6  | 8.69E-01 | 4.00E-04 | 1.00E+00 | 1.67E-03 |
| Mettl17_chr14 | 12 | 11 | 15  | 8  | -0.2 | 1.1 | -0.9 | 1.8  | 5.53E-01 | 5.00E-05 | 1.00E+00 | 2.85E-04 |
| Mettl23_chr11 | 17 | 11 | 16  | 7  | -0.6 | 1.6 | -1.3 | 2.4  | 2.58E-02 | 5.00E-05 | 6.95E-01 | 2.85E-04 |
| Mfap5_chr6    | 2  | 1  | 2   | 0  | -0.6 | 1.5 | -1.0 | 2.0  | 2.71E-01 | 5.00E-05 | 9.94E-01 | 2.85E-04 |
| Mfge8_chr7    | 59 | 55 | 122 | 54 | -0.1 | 1.1 | -1.2 | 2.3  | 7.09E-01 | 2.50E-04 | 1.00E+00 | 1.25E-03 |
| Mgat4a_chr1   | 14 | 14 | 26  | 16 | 0.0  | 1.0 | -0.7 | 1.6  | 9.39E-01 | 5.00E-05 | 1.00E+00 | 2.85E-04 |
| Micall1_chr15 | 8  | 8  | 16  | 10 | 0.1  | 1.1 | -0.6 | 1.6  | 6.34E-01 | 5.00E-05 | 1.00E+00 | 2.85E-04 |
| Mid1_chrX     | 9  | 10 | 38  | 2  | -0.5 | 1.4 | -4.3 | 20.4 | 6.28E-01 | 1.36E-02 | 1.00E+00 | 3.75E-02 |
| Miip_chr4     | 14 | 9  | 19  | 10 | -0.6 | 1.6 | -1.0 | 1.9  | 1.34E-02 | 5.00E-05 | 5.29E-01 | 2.85E-04 |
| Milt6_chr11   | 38 | 40 | 83  | 49 | 0.1  | 1.1 | -0.8 | 1.7  | 7.00E-01 | 5.00E-05 | 1.00E+00 | 2.85E-04 |
| Mmp11_chr10   | 1  | 1  | 2   | 1  | 0.1  | 1.0 | -1.0 | 1.9  | 8.80E-01 | 5.00E-05 | 1.00E+00 | 2.85E-04 |
| Mmp15_chr8    | 1  | 1  | 2   | 1  | 0.2  | 1.1 | -0.8 | 1.8  | 2.06E-01 | 5.00E-05 | 9.87E-01 | 2.85E-04 |
| Mmp17_chr5    | 2  | 3  | 5   | 2  | 0.5  | 1.4 | -1.2 | 2.4  | 1.24E-01 | 5.00E-05 | 9.50E-01 | 2.85E-04 |
| Mmp2_chr8     | 5  | 5  | 10  | 5  | 0.1  | 1.0 | -1.0 | 2.1  | 8.26E-01 | 5.00E-05 | 1.00E+00 | 2.85E-04 |
| Mmrn2_chr14   | 5  | 6  | 12  | 7  | 0.4  | 1.3 | -0.7 | 1.7  | 1.58E-01 | 5.00E-05 | 9.77E-01 | 2.85E-04 |
| Morn1_chr4    | 1  | 1  | 2   | 1  | 0.0  | 1.0 | -0.6 | 1.5  | 4.93E-01 | 1.40E-03 | 1.00E+00 | 5.72E-03 |
| Mpdz_chr4     | 1  | 2  | 3   | 2  | 0.1  | 1.1 | -0.7 | 1.7  | 7.25E-01 | 5.00E-05 | 1.00E+00 | 2.85E-04 |
| Mras_chr9     | 4  | 3  | 7   | 4  | -0.4 | 1.3 | -0.7 | 1.6  | 1.52E-01 | 5.00E-05 | 9.72E-01 | 2.85E-04 |
| Mrgpre_chr7   | 3  | 4  | 7   | 4  | 0.3  | 1.2 | -1.0 | 2.0  | 2.95E-01 | 5.00E-05 | 9.96E-01 | 2.85E-04 |
| Mtss1_chr15   | 14 | 17 | 27  | 15 | 0.2  | 1.2 | -0.9 | 1.9  | 4.05E-01 | 1.12E-03 | 9.96E-01 | 4.47E-03 |
| Mturn_chr6    | 5  | 5  | 9   | 6  | -0.2 | 1.1 | -0.6 | 1.5  | 5.81E-01 | 4.00E-04 | 1.00E+00 | 1.91E-03 |
| Mutyh_chr4    | 3  | 3  | 4   | 3  | 0.2  | 1.1 | -0.6 | 1.5  | 7.10E-01 | 1.96E-03 | 1.00E+00 | 7.68E-03 |
| Mxra8_chr4    | 10 | 12 | 18  | 12 | 0.2  | 1.2 | -0.6 | 1.6  | 3.21E-01 | 5.00E-05 | 9.97E-01 | 2.85E-04 |
| Mybpc2_chr7   | 1  | 1  | 2   | 1  | -0.1 | 1.1 | -1.0 | 2.0  | 6.20E-01 | 5.00E-05 | 1.00E+00 | 2.85E-04 |
| Mycl_chr4     | 5  | 5  | 12  | 8  | -0.2 | 1.1 | -0.7 | 1.6  | 4.95E-01 | 5.00E-05 | 1.00E+00 | 2.85E-04 |
| Myh11_chr16   | 6  | 6  | 4   | 0  | -0.1 | 1.0 | -2.0 | 3.9  | 8.14E-01 | 2.89E-02 | 1.00E+00 | 8.07E-02 |
| Myl9_chr2     | 17 | 22 | 26  | 15 | 0.4  | 1.3 | -0.7 | 1.7  | 1.05E-01 | 5.00E-05 | 9.38E-01 | 2.85E-04 |
| Mylip_chr13   | 32 | 40 | 59  | 38 | 0.3  | 1.2 | -0.6 | 1.5  | 1.69E-01 | 3.25E-04 | 9.80E-01 | 1.59E-03 |
| Mylk_chr16    | 11 | 13 | 22  | 13 | 0.2  | 1.1 | -0.8 | 1.7  | 3.52E-01 | 5.00E-05 | 9.98E-01 | 2.85E-04 |
| Myo1c_chr11   | 26 | 31 | 53  | 32 | 0.3  | 1.2 | -0.7 | 1.7  | 3.79E-01 | 6.97E-03 | 9.95E-01 | 2.17E-02 |
| Myo1e_chr9    | 21 | 29 | 46  | 23 | 0.5  | 1.4 | -1.0 | 2.0  | 2.85E-02 | 5.00E-05 | 7.25E-01 | 2.85E-04 |
| Myzap_chr9    | 2  | 3  | 4   | 2  | 0.1  | 1.1 | -0.6 | 1.5  | 7.38E-01 | 1.45E-03 | 1.00E+00 | 5.90E-03 |
| N4bp2_chr5    | 9  | 8  | 21  | 13 | -0.1 | 1.1 | -0.7 | 1.6  | 7.10E-01 | 5.00E-05 | 1.00E+00 | 2.85E-04 |
| N4bp3_chr11   | 4  | 5  | 7   | 4  | 0.5  | 1.4 | -0.7 | 1.6  | 1.47E-01 | 1.15E-03 | 9.68E-01 | 4.84E-03 |
| Naaa_chr5     | 33 | 25 | 51  | 30 | -0.4 | 1.3 | -0.8 | 1.7  | 5.04E-02 | 5.00E-05 | 8.45E-01 | 2.85E-04 |
| Naalad2_chr9  | 1  | 1  | 2   | 1  | 0.0  | 1.0 | -0.9 | 1.8  | 4.56E-01 | 5.00E-05 | 1.00E+00 | 2.85E-04 |
| Nbl1_chr4     | 2  | 2  | 4   | 2  | -0.2 | 1.2 | -1.1 | 2.1  | 6.24E-01 | 5.00E-05 | 1.00E+00 | 2.85E-04 |
| Ncoa3_chr2    | 24 | 27 | 54  | 35 | 0.2  | 1.1 | -0.6 | 1.5  | 3.98E-01 | 1.00E-04 | 1.00E+00 | 5.44E-04 |
| Ndn_chr7      | 4  | 4  | 6   | 4  | 0.1  | 1.1 | -0.7 | 1.6  | 6.80E-01 | 1.50E-04 | 1.00E+00 | 7.89E-04 |
| Ndrg2_chr14   | 5  | 4  | 6   | 3  | -0.1 | 1.1 | -0.9 | 1.9  | 7.33E-01 | 4.07E-02 | 1.00E+00 | 8.50E-02 |
| Nedd4l_chr18  | 3  | 3  | 5   | 3  | 0.3  | 1.2 | -0.6 | 1.6  | 2.56E-01 | 5.00E-05 | 9.97E-01 | 2.85E-04 |
| Nek6_chr2     | 3  | 2  | 5   | 3  | -0.3 | 1.2 | -0.9 | 1.9  | 4.69E-01 | 5.00E-05 | 9.98E-01 | 2.85E-04 |
| Neo1_chr9     | 1  | 2  | 3   | 2  | 0.3  | 1.2 | -1.0 | 2.0  | 3.97E-01 | 5.00E-05 | 1.00E+00 | 2.85E-04 |
| Nfatc4_chr14  | 1  | 2  | 3   | 2  | 0.1  | 1.1 | -0.9 | 1.8  | 8.20E-01 | 1.75E-04 | 1.00E+00 | 8.33E-04 |
| Ngf_chr3      | 2  | 2  | 3   | 1  | -0.2 | 1.2 | -1.3 | 2.4  | 7.41E-01 | 1.50E-04 | 1.00E+00 | 8.06E-04 |
| Nid1_chr13    | 22 | 25 | 51  | 34 | 0.2  | 1.2 | -0.6 | 1.5  | 3.01E-01 | 1.50E-04 | 9.85E-01 | 7.89E-04 |
| Nipal3_chr4   | 8  | 9  | 19  | 13 | 0.1  | 1.1 | -0.6 | 1.5  | 6.87E-01 | 5.00E-05 | 1.00E+00 | 2.85E-04 |
| Nirc3_chr16   | 9  | 7  | 21  | 14 | -0.3 | 1.3 | -0.6 | 1.5  | 1.34E-01 | 5.00E-05 | 8.81E-01 | 2.85E-04 |
| Nirc4_chr17   | 8  | 8  | 16  | 10 | 0.0  | 1.0 | -0.6 | 1.6  | 9.30E-01 | 5.00E-05 | 1.00E+00 | 2.85E-04 |
| Nmrk1_chr19   | 10 | 7  | 13  | 5  | -0.5 | 1.4 | -1.4 | 2.7  | 1.07E-01 | 5.00E-05 | 8.51E-01 | 2.85E-04 |
| Nol12_chr15   | 6  | 6  | 7   | 5  | -0.1 | 1.0 | -0.7 | 1.6  | 8.26E-01 | 5.00E-05 | 1.00E+00 | 2.85E-04 |
| Notch2_chr3   | 26 | 31 | 74  | 45 | 0.3  | 1.2 | -0.7 | 1.6  | 1.96E-01 | 1.50E-04 | 9.87E-01 | 7.89E-04 |
| Notch3_chr17  | 4  | 4  | 12  | 6  | -0.1 | 1.1 | -1.1 | 2.1  | 7.51E-01 | 5.00E-05 | 1.00E+00 | 2.85E-04 |
| Nphp3_chr9    | 1  | 1  | 2   | 2  | -0.2 | 1.1 | -0.6 | 1.6  | 6.33E-01 | 2.75E-04 | 1.00E+00 | 1.33E-03 |
| Npnt_chr3     | 12 | 12 | 37  | 23 | 0.0  | 1.0 | -0.7 | 1.6  | 9.10E-01 | 2.17E-02 | 1.00E+00 | 5.24E-02 |
| Npr2_chr4     | 3  | 3  | 6   | 4  | 0.0  | 1.0 | -0.6 | 1.5  | 9.41E-01 | 2.50E-04 | 1.00E+00 | 1.25E-03 |
| Npy1r_chr8    | 3  | 3  | 7   | 2  | -0.3 | 1.2 | -1.8 | 3.4  | 4.18E-01 | 5.00E-05 | 1.00E+00 | 2.85E-04 |
| Nr1d1_chr11   | 9  | 4  | 18  | 8  | -1.1 | 2.2 | -1.1 | 2.2  | 9.83E-05 | 5.00E-05 | 1.39E-02 | 2.85E-04 |
| Nrip2_chr6    | 1  | 1  | 2   | 1  | 0.0  | 1.0 | -0.6 | 1.5  | 9.78E-01 | 6.18E-03 | 1.00E+00 | 2.09E-02 |
| Nrm_chr17     | 12 | 18 | 19  | 12 | 0.5  | 1.5 | -0.6 | 1.5  | 3.03E-02 | 5.00E-05 | 7.39E-01 | 2.85E-04 |
| Nrn1_chr13    | 2  | 1  | 2   | 0  | -0.6 | 1.5 | -0.8 | 1.8  | 1.32E-01 | 5.00E-05 | 9.56E-01 | 2.85E-04 |
| Nsg2_chr11    | 12 | 12 | 17  | 8  | 0.0  | 1.0 | -1.1 | 2.2  | 9.62E-01 | 5.00E-05 | 1.00E+00 | 2.85E-04 |
| Nt5c2_chr19   | 6  | 7  | 4   | 1  | 0.1  | 1.1 | -1.7 | 3.2  | 6.48E-01 | 2.00E-03 | 1.00E+00 | 8.84E-03 |
| Nt5e_chr9     | 6  | 6  | 10  | 6  | -0.1 | 1.1 | -0.9 | 1.9  | 7.72E-01 | 5.00E-05 | 1.00E+00 | 2.85E-04 |
| Ntf3_chr6     | 1  | 1  | 2   | 1  | 0.0  | 1.0 | -0.8 | 1.7  | 6.65E-01 | 9.50E-04 | 1.00E+00 | 3.57E-03 |
| Ntm_chr9      | 1  | 0  | 2   | 0  | 0.0  | 1.0 | -0.7 | 1.7  | 4.99E-02 | 5.00E-05 | 8.47E-01 | 2.85E-04 |
| Olfml1_chr7   | 6  | 6  | 11  | 5  | -0.2 | 1.1 | -1.2 | 2.3  | 5.98E-01 | 5.00E-05 | 1.00E+00 | 2.85E-04 |
| Olfr433_chr1  | 1  | 1  | 2   | 0  | -0.5 | 1.4 | -1.1 | 2.2  | 3.96E-01 | 5.00E-05 | 1.00E+00 | 2.85E-04 |
| Orai2_chr5    | 19 | 19 | 33  | 20 | 0.0  | 1.0 | -0.8 | 1.7  | 9.87E-01 | 5.00E-05 | 1.00E+00 | 2.85E-04 |
| Osbpl5_chr7   | 7  | 9  | 16  | 11 | 0.4  | 1.3 | -0.6 | 1.5  | 1.23E-01 | 5.00E-05 | 9.54E-01 | 2.85E-04 |
| Otud1_chr2    | 8  | 10 | 12  | 7  | 0.4  | 1.3 | -0.7 | 1.6  | 1.12E-01 | 5.00E-05 | 9.39E-01 | 2.85E-04 |
| Pacsin1_chr17 | 3  | 3  | 7   | 3  | 0.0  | 1.0 | -1.1 | 2.1  | 8.46E-01 | 3.75E-03 | 1.00E+00 | 1.21E-02 |
| Pam_chr1      | 9  | 9  | 19  | 11 | 0.1  | 1.1 | -0.8 | 1.7  | 6.29E-01 | 5.00E-05 | 1.00E+00 | 2.85E-04 |
| Paqr7_chr4    | 4  | 4  | 8   | 5  | -0.1 | 1.1 | -0.8 | 1.7  | 6.49E-01 | 5.00E-05 | 1.00E+00 | 2.85E-04 |
| Pard3b_chr1   | 2  | 1  | 3   | 2  | -0.4 | 1.3 | -1.0 | 2.0  | 1.89E-01 | 5.00E-05 | 9.45E-01 | 2.85E-04 |
| Pard6b_chr2   | 1  | 1  | 2   | 1  | 0.0  | 1.0 | -0.7 | 1.6  | 2.03E-01 | 2.00E-04 | 9.87E-01 | 1.02E-03 |
| Pard6g_chr18  | 1  | 1  | 2   | 1  | -0.2 | 1.1 | -0.8 | 1.7  | 5.86E-01 | 5.00E-05 | 1.00E+00 | 2.85E-04 |
| Parm1_chr5    | 4  | 4  | 10  | 4  | -0.3 | 1.2 | -1.2 | 2.3  | 4.04E-01 | 5.00E-05 | 1.00E+00 | 2.85E-04 |
| Parva_chr7    | 6  | 6  | 12  | 8  | 0.0  | 1.0 | -0.6 | 1.5  | 8.41E-01 | 5.00E-05 | 1.00E+00 | 2.85E-04 |
| Pcdh15_chr10  | 1  | 0  | 2   | 0  | 0.0  | 1.0 | -0.8 | 1.7  | 2.99E-05 | 5.00E-05 | 6.05E-03 | 2.85E-04 |
| Pcp411_chr1   | 4  | 4  | 5   | 2  | -0.1 | 1.0 | -1.5 | 2.9  | 8.67E-01 | 5.00E-05 | 1.00E+00 | 2.85E-04 |

|                |    |     |    |    |      |     |      |      |          |          |          |          |
|----------------|----|-----|----|----|------|-----|------|------|----------|----------|----------|----------|
| Pcsk6_chr7     | 1  | 2   | 3  | 1  | 0.6  | 1.6 | -1.4 | 2.7  | 9.16E-02 | 5.00E-05 | 9.27E-01 | 2.85E-04 |
| Pctp_chr11     | 5  | 5   | 8  | 5  | 0.0  | 1.0 | -0.6 | 1.5  | 9.66E-01 | 2.00E-04 | 1.00E+00 | 1.02E-03 |
| Pdcd1lg2_chr19 | 3  | 4   | 5  | 3  | 0.5  | 1.4 | -0.8 | 1.8  | 1.22E-01 | 5.00E-05 | 9.50E-01 | 2.85E-04 |
| Pde1a_chr2     | 1  | 1   | 2  | 1  | 0.0  | 1.0 | -1.0 | 2.0  | 6.81E-01 | 5.00E-05 | 1.00E+00 | 2.49E-04 |
| Pde3b_chr7     | 13 | 12  | 25 | 13 | -0.1 | 1.1 | -0.9 | 1.9  | 5.45E-01 | 5.00E-05 | 1.00E+00 | 2.85E-04 |
| Pde4b_chr4     | 15 | 20  | 23 | 13 | 0.5  | 1.4 | -0.8 | 1.8  | 8.47E-02 | 1.10E-03 | 9.04E-01 | 4.45E-03 |
| Pdia5_chr16    | 4  | 4   | 7  | 4  | -0.2 | 1.2 | -0.7 | 1.6  | 5.56E-01 | 1.50E-04 | 1.00E+00 | 7.89E-04 |
| Pdk4_chr6      | 8  | 5   | 13 | 5  | -0.5 | 1.5 | -1.3 | 2.5  | 4.38E-02 | 5.00E-05 | 7.01E-01 | 2.85E-04 |
| Pdlim3_chr8    | 2  | 2   | 3  | 1  | -0.4 | 1.3 | -1.7 | 3.3  | 3.82E-01 | 5.00E-05 | 1.00E+00 | 2.85E-04 |
| Pdzd2_chr15    | 1  | 1   | 2  | 1  | 0.0  | 1.0 | -1.1 | 2.2  | 6.38E-01 | 5.00E-05 | 1.00E+00 | 2.85E-04 |
| Pdzd4_chrX     | 2  | 2   | 4  | 2  | -0.2 | 1.1 | -1.1 | 2.2  | 5.75E-01 | 5.00E-05 | 1.00E+00 | 2.85E-04 |
| Pea15a_chr1    | 34 | 33  | 50 | 32 | 0.0  | 1.0 | -0.7 | 1.6  | 8.32E-01 | 5.00E-05 | 1.00E+00 | 2.85E-04 |
| Pecam1_chr11   | 29 | 36  | 56 | 35 | 0.3  | 1.2 | -0.7 | 1.6  | 2.90E-01 | 2.75E-03 | 9.91E-01 | 1.02E-02 |
| Peg13_chr15    | 18 | 22  | 32 | 20 | 0.3  | 1.2 | -0.7 | 1.6  | 2.28E-01 | 3.50E-04 | 9.89E-01 | 1.68E-03 |
| Pglyrp2_chr17  | 10 | 11  | 20 | 12 | 0.2  | 1.1 | -0.7 | 1.6  | 5.04E-01 | 5.00E-05 | 1.00E+00 | 2.85E-04 |
| Phc1_chr6      | 3  | 4   | 8  | 5  | 0.4  | 1.3 | -0.7 | 1.6  | 4.04E-01 | 2.19E-02 | 9.81E-01 | 5.28E-02 |
| Pi15_chr1      | 2  | 1   | 2  | 1  | -0.3 | 1.2 | -1.2 | 2.4  | 3.97E-01 | 5.00E-05 | 1.00E+00 | 2.85E-04 |
| Pianp_chr6     | 9  | 2   | 15 | 1  | -2.2 | 4.6 | -3.6 | 12.5 | 2.66E-07 | 5.00E-05 | 8.12E-05 | 2.85E-04 |
| Pik3r4_chr9    | 14 | 18  | 30 | 19 | 0.3  | 1.2 | -0.7 | 1.6  | 1.64E-01 | 5.00E-05 | 9.80E-01 | 2.85E-04 |
| Pira2_chr7     | 16 | 10  | 23 | 14 | -0.7 | 1.6 | -0.7 | 1.6  | 1.08E-02 | 8.65E-03 | 4.88E-01 | 2.76E-02 |
| Pkd1_chr17     | 15 | 12  | 40 | 24 | -0.3 | 1.2 | -0.8 | 1.7  | 2.31E-01 | 3.00E-04 | 9.66E-01 | 1.47E-03 |
| Pkia_chr3      | 4  | 3   | 7  | 4  | -0.4 | 1.3 | -0.6 | 1.5  | 1.86E-01 | 1.00E-04 | 9.86E-01 | 5.44E-04 |
| Pla2g5_chr4    | 14 | 6   | 23 | 7  | -1.3 | 2.5 | -1.8 | 3.4  | 1.60E-06 | 5.00E-05 | 7.01E-04 | 2.85E-04 |
| Pla2r1_chr2    | 1  | 1   | 2  | 1  | 0.1  | 1.1 | -1.0 | 2.0  | 8.21E-01 | 5.00E-05 | 1.00E+00 | 2.85E-04 |
| Plcd3_chr11    | 1  | 0   | 2  | 1  | -0.6 | 1.5 | -1.3 | 2.5  | 4.08E-04 | 5.00E-05 | 6.64E-02 | 2.85E-04 |
| Plce1_chr19    | 2  | 2   | 4  | 2  | 0.3  | 1.2 | -0.9 | 1.8  | 2.59E-01 | 5.00E-05 | 9.72E-01 | 2.85E-04 |
| Plcg1_chr2     | 18 | 17  | 37 | 22 | -0.1 | 1.1 | -0.7 | 1.7  | 5.71E-01 | 5.00E-05 | 1.00E+00 | 2.85E-04 |
| Plekha2_chr8   | 40 | 49  | 67 | 37 | 0.3  | 1.2 | -0.9 | 1.8  | 1.63E-01 | 5.00E-05 | 9.80E-01 | 2.85E-04 |
| Plekha7_chr7   | 1  | 1   | 2  | 1  | 0.0  | 1.0 | -0.7 | 1.7  | 7.69E-01 | 5.00E-05 | 1.00E+00 | 2.85E-04 |
| Plekhh2_chr17  | 2  | 2   | 4  | 2  | -0.1 | 1.1 | -0.9 | 1.9  | 7.43E-01 | 5.00E-05 | 1.00E+00 | 2.85E-04 |
| Plxdc2_chr2    | 2  | 2   | 5  | 3  | 0.1  | 1.1 | -0.8 | 1.8  | 7.34E-01 | 5.00E-05 | 1.00E+00 | 2.85E-04 |
| Pmepa1_chr2    | 2  | 2   | 4  | 2  | 0.2  | 1.1 | -0.6 | 1.6  | 5.58E-01 | 2.00E-04 | 1.00E+00 | 1.02E-03 |
| Podn_chr4      | 2  | 2   | 4  | 2  | -0.1 | 1.1 | -0.8 | 1.8  | 8.21E-01 | 5.00E-05 | 1.00E+00 | 2.85E-04 |
| Podnl1_chr8    | 2  | 1   | 3  | 2  | -0.5 | 1.4 | -0.6 | 1.6  | 3.10E-01 | 4.50E-04 | 9.97E-01 | 2.12E-03 |
| Podxl_chr6     | 3  | 4   | 7  | 5  | 0.3  | 1.2 | -0.6 | 1.5  | 2.99E-01 | 5.00E-05 | 9.96E-01 | 2.85E-04 |
| Poli_chr18     | 4  | 5   | 10 | 3  | 0.2  | 1.1 | -1.7 | 3.3  | 6.93E-01 | 5.00E-05 | 1.00E+00 | 2.97E-04 |
| Polr3h_chr15   | 6  | 5   | 10 | 5  | -0.5 | 1.4 | -1.1 | 2.2  | 3.89E-01 | 2.98E-02 | 1.00E+00 | 7.78E-02 |
| Postn_chr3     | 3  | 2   | 6  | 2  | -0.4 | 1.4 | -1.6 | 3.0  | 4.14E-01 | 5.00E-05 | 9.05E-01 | 2.61E-04 |
| Pou2f1_chr1    | 5  | 4   | 9  | 5  | 0.0  | 1.0 | -0.8 | 1.8  | 8.33E-01 | 4.60E-02 | 1.00E+00 | 1.07E-01 |
| Pou6f1_chr15   | 11 | 12  | 22 | 14 | 0.1  | 1.1 | -0.7 | 1.6  | 5.83E-01 | 5.00E-05 | 1.00E+00 | 2.85E-04 |
| Ppl_chr16      | 3  | 3   | 5  | 2  | 0.0  | 1.0 | -1.5 | 2.8  | 9.28E-01 | 5.00E-05 | 1.00E+00 | 2.85E-04 |
| Ppm1e_chr11    | 3  | 3   | 4  | 2  | 0.0  | 1.0 | -0.8 | 1.7  | 9.23E-01 | 5.00E-05 | 1.00E+00 | 2.85E-04 |
| Ppp1r13b_chr12 | 9  | 11  | 20 | 13 | 0.3  | 1.2 | -0.7 | 1.6  | 1.77E-01 | 5.00E-05 | 9.84E-01 | 2.85E-04 |
| Ppp1r16b_chr2  | 19 | 22  | 31 | 20 | 0.2  | 1.2 | -0.8 | 1.7  | 3.07E-01 | 2.10E-02 | 9.93E-01 | 5.02E-02 |
| Ppp1r3c_chr19  | 1  | 1   | 2  | 1  | 0.0  | 1.0 | -0.7 | 1.6  | 9.87E-01 | 1.35E-03 | 1.00E+00 | 5.55E-03 |
| Ppp3ca_chr3    | 34 | 45  | 58 | 34 | 0.4  | 1.3 | -0.8 | 1.7  | 6.39E-02 | 5.00E-05 | 8.76E-01 | 2.85E-04 |
| Pqlc2_chr4     | 9  | 9   | 19 | 10 | 0.0  | 1.0 | -0.9 | 1.9  | 9.65E-01 | 5.00E-05 | 1.00E+00 | 2.85E-04 |
| Prdm11_chr2    | 2  | 1   | 5  | 3  | -0.2 | 1.2 | -0.7 | 1.6  | 6.47E-01 | 1.50E-04 | 1.00E+00 | 7.89E-04 |
| Prelp_chr1     | 9  | 13  | 21 | 12 | 0.6  | 1.5 | -0.8 | 1.8  | 1.31E-02 | 5.00E-05 | 5.25E-01 | 2.85E-04 |
| Prex2_chr1     | 3  | 2   | 9  | 6  | -0.4 | 1.3 | -0.7 | 1.6  | 4.46E-01 | 1.88E-04 | 8.37E-01 | 8.19E-04 |
| Prkca_chr11    | 6  | 5   | 13 | 8  | -0.3 | 1.2 | -0.6 | 1.5  | 2.06E-01 | 5.00E-05 | 9.51E-01 | 2.85E-04 |
| Prkce_chr17    | 6  | 7   | 13 | 6  | 0.2  | 1.2 | -1.1 | 2.2  | 3.55E-01 | 5.00E-05 | 9.98E-01 | 2.85E-04 |
| Prkcc_chr2     | 14 | 13  | 24 | 15 | -0.1 | 1.1 | -0.7 | 1.6  | 6.28E-01 | 5.00E-05 | 1.00E+00 | 2.85E-04 |
| Prkcz_chr4     | 4  | 2   | 9  | 4  | -0.8 | 1.7 | -1.2 | 2.4  | 9.85E-03 | 5.00E-05 | 4.68E-01 | 2.85E-04 |
| Prkd1_chr12    | 1  | 1   | 2  | 1  | 0.0  | 1.0 | -0.7 | 1.6  | 5.66E-01 | 5.00E-05 | 1.00E+00 | 2.85E-04 |
| Prkd3_chr17    | 6  | 6   | 16 | 11 | 0.1  | 1.1 | -0.8 | 1.8  | 8.25E-01 | 3.62E-03 | 1.00E+00 | 1.30E-02 |
| Prmt2_chr10    | 4  | 6   | 7  | 5  | 0.4  | 1.3 | -0.6 | 1.5  | 3.58E-01 | 2.96E-02 | 9.94E-01 | 6.21E-02 |
| Prr5_chr15     | 10 | 14  | 19 | 12 | 0.5  | 1.4 | -0.7 | 1.6  | 3.45E-02 | 1.50E-04 | 7.66E-01 | 7.89E-04 |
| Prrg3_chrX     | 1  | 1   | 2  | 1  | 0.3  | 1.3 | -0.7 | 1.6  | 3.54E-01 | 1.00E-04 | 9.98E-01 | 5.44E-04 |
| Prss12_chr3    | 2  | 2   | 3  | 1  | 0.1  | 1.1 | -1.5 | 2.8  | 8.53E-01 | 5.00E-05 | 1.00E+00 | 2.85E-04 |
| Prss23_chr7    | 4  | 5   | 6  | 4  | 0.4  | 1.3 | -0.6 | 1.5  | 1.73E-01 | 2.00E-04 | 9.82E-01 | 1.02E-03 |
| Prune2_chr19   | 1  | 0   | 2  | 0  | 0.0  | 1.0 | -0.8 | 1.8  | 6.63E-03 | 5.00E-05 | 2.90E-01 | 2.85E-04 |
| Ptgfrn_chr3    | 3  | 3   | 7  | 5  | 0.2  | 1.1 | -0.7 | 1.6  | 4.48E-01 | 5.00E-05 | 1.00E+00 | 2.85E-04 |
| Pth1r_chr9     | 2  | 1   | 3  | 1  | -0.2 | 1.1 | -1.5 | 2.9  | 5.59E-01 | 5.00E-04 | 1.00E+00 | 2.44E-03 |
| Ptp4a3_chr15   | 26 | 23  | 38 | 26 | -0.3 | 1.2 | -0.9 | 1.9  | 5.47E-01 | 3.76E-02 | 1.00E+00 | 9.19E-02 |
| Ptpdc1_chr13   | 2  | 2   | 4  | 2  | 0.0  | 1.0 | -0.9 | 1.8  | 8.96E-01 | 5.00E-05 | 1.00E+00 | 2.85E-04 |
| Ptpn14_chr1    | 12 | 12  | 29 | 8  | 0.1  | 1.0 | -1.9 | 3.7  | 7.99E-01 | 5.00E-05 | 1.00E+00 | 2.85E-04 |
| Ptprcap_chr19  | 69 | 100 | 73 | 42 | 0.5  | 1.4 | -0.8 | 1.7  | 1.14E-02 | 5.00E-05 | 4.96E-01 | 2.85E-04 |
| Ptprf_chr4     | 2  | 2   | 6  | 4  | 0.1  | 1.1 | -0.7 | 1.6  | 7.84E-01 | 5.00E-05 | 1.00E+00 | 2.85E-04 |
| Ptrf_chr11     | 11 | 14  | 22 | 13 | 0.4  | 1.3 | -0.8 | 1.7  | 6.06E-02 | 5.00E-05 | 8.75E-01 | 2.85E-04 |
| Pxdn_chr12     | 2  | 2   | 5  | 2  | -0.3 | 1.2 | -1.5 | 2.9  | 3.96E-01 | 5.00E-05 | 1.00E+00 | 2.85E-04 |
| Pxk_chr14      | 36 | 57  | 65 | 43 | 0.7  | 1.6 | -0.6 | 1.5  | 1.81E-03 | 1.75E-04 | 1.82E-01 | 9.15E-04 |
| Pygm_chr19     | 2  | 3   | 5  | 3  | 0.4  | 1.3 | -0.7 | 1.6  | 2.64E-01 | 5.00E-05 | 9.94E-01 | 2.85E-04 |
| Rab33b_chr3    | 10 | 9   | 14 | 9  | -0.1 | 1.1 | -0.6 | 1.5  | 7.36E-01 | 5.00E-05 | 1.00E+00 | 2.85E-04 |
| Rab6b_chr9     | 5  | 1   | 10 | 0  | -2.3 | 5.0 | -3.3 | 9.7  | 1.62E-14 | 5.00E-05 | 5.03E-11 | 2.85E-04 |
| Rabep2_chr7    | 22 | 24  | 37 | 24 | 0.1  | 1.1 | -0.6 | 1.6  | 6.53E-01 | 5.00E-05 | 1.00E+00 | 2.85E-04 |
| Rai2_chrX      | 1  | 1   | 2  | 1  | 0.0  | 1.0 | -1.1 | 2.1  | 7.61E-01 | 5.00E-05 | 1.00E+00 | 2.70E-04 |
| Ralgapa2_chr2  | 5  | 3   | 10 | 5  | -0.5 | 1.4 | -0.9 | 1.9  | 1.96E-02 | 5.00E-05 | 5.16E-01 | 2.85E-04 |
| Ralgds_chr2    | 4  | 4   | 11 | 7  | 0.4  | 1.3 | -0.7 | 1.6  | 3.92E-01 | 4.45E-02 | 9.85E-01 | 8.66E-02 |
| Ralgps2_chr1   | 21 | 22  | 50 | 16 | 0.0  | 1.0 | -1.7 | 3.2  | 1.00E+00 | 5.98E-03 | 1.00E+00 | 1.86E-02 |
| Rap1gap_chr4   | 2  | 2   | 4  | 0  | -0.2 | 1.1 | -2.1 | 4.4  | 1.00E+00 | 5.00E-05 | 1.00E+00 | 2.74E-04 |
| Rapgef4_chr2   | 17 | 11  | 27 | 4  | -0.7 | 1.6 | -2.7 | 6.3  | 5.23E-03 | 5.00E-05 | 2.65E-01 | 2.85E-04 |
| Rarres2_chr6   | 23 | 27  | 21 | 13 | 0.2  | 1.2 | -0.7 | 1.6  | 4.86E-01 | 2.54E-02 | 1.00E+00 | 6.84E-02 |

|                 |    |     |     |    |      |     |      |     |          |          |          |          |
|-----------------|----|-----|-----|----|------|-----|------|-----|----------|----------|----------|----------|
| Rasa3_chr8      | 54 | 64  | 112 | 66 | 0.2  | 1.2 | -0.8 | 1.7 | 2.64E-01 | 5.00E-05 | 9.94E-01 | 2.85E-04 |
| Rasgrp2_chr19   | 45 | 51  | 71  | 44 | 0.2  | 1.1 | -0.7 | 1.6 | 3.73E-01 | 5.00E-05 | 1.00E+00 | 2.85E-04 |
| Rasl11a_chr5    | 2  | 4   | 3   | 2  | 0.7  | 1.7 | -0.8 | 1.8 | 9.69E-02 | 6.50E-04 | 9.33E-01 | 2.93E-03 |
| Rasl11b_chr5    | 3  | 3   | 4   | 2  | 0.0  | 1.0 | -1.3 | 2.4 | 9.42E-01 | 5.00E-05 | 1.00E+00 | 2.85E-04 |
| Rasl12_chr9     | 1  | 1   | 2   | 1  | 0.0  | 1.0 | -0.8 | 1.7 | 9.47E-01 | 3.00E-04 | 1.00E+00 | 1.43E-03 |
| Rassf2_chr2     | 43 | 52  | 90  | 49 | 0.3  | 1.2 | -0.9 | 1.9 | 2.53E-01 | 5.00E-05 | 9.92E-01 | 2.85E-04 |
| Rassf5_chr1     | 40 | 49  | 73  | 48 | 0.3  | 1.2 | -0.6 | 1.5 | 1.61E-01 | 1.50E-04 | 9.78E-01 | 7.89E-04 |
| Rbfox2_chr15    | 2  | 2   | 3   | 2  | -0.1 | 1.0 | -0.6 | 1.5 | 8.85E-01 | 2.07E-02 | 1.00E+00 | 5.61E-02 |
| Rbms3_chr9      | 3  | 3   | 4   | 2  | -0.1 | 1.1 | -0.7 | 1.7 | 6.54E-01 | 7.10E-03 | 1.00E+00 | 2.34E-02 |
| Rcan2_chr17     | 2  | 1   | 4   | 1  | -0.8 | 1.7 | -1.9 | 3.7 | 7.91E-02 | 5.00E-05 | 9.03E-01 | 2.85E-04 |
| Rcn3_chr7       | 15 | 18  | 22  | 14 | 0.3  | 1.3 | -0.7 | 1.6 | 1.74E-01 | 1.00E-04 | 9.84E-01 | 5.44E-04 |
| Rdh12_chr12     | 7  | 8   | 8   | 6  | 0.2  | 1.1 | -0.6 | 1.5 | 5.94E-01 | 4.50E-04 | 1.00E+00 | 2.12E-03 |
| Reck_chr4       | 4  | 4   | 8   | 4  | 0.2  | 1.1 | -0.9 | 1.9 | 5.53E-01 | 5.00E-05 | 1.00E+00 | 2.85E-04 |
| Rem1_chr2       | 3  | 2   | 6   | 3  | -0.1 | 1.0 | -0.9 | 1.8 | 8.92E-01 | 5.00E-05 | 1.00E+00 | 2.85E-04 |
| Rftn1_chr17     | 20 | 24  | 46  | 28 | 0.3  | 1.2 | -0.7 | 1.6 | 1.94E-01 | 5.00E-05 | 9.87E-01 | 2.85E-04 |
| Rgma_chr7       | 1  | 1   | 2   | 1  | 0.0  | 1.0 | -1.1 | 2.1 | 8.37E-01 | 5.00E-05 | 1.00E+00 | 2.85E-04 |
| Rgs9_chr11      | 1  | 1   | 2   | 1  | -0.3 | 1.2 | -1.0 | 2.0 | 9.37E-02 | 5.00E-05 | 8.00E-01 | 2.85E-04 |
| Rhobtb2_chr14   | 11 | 13  | 24  | 16 | 0.2  | 1.1 | -0.6 | 1.5 | 3.76E-01 | 1.00E-04 | 1.00E+00 | 5.44E-04 |
| Rhoh_chr5       | 13 | 15  | 19  | 9  | 0.2  | 1.1 | -1.0 | 2.0 | 4.25E-01 | 5.00E-05 | 1.00E+00 | 2.85E-04 |
| Rnd3_chr2       | 14 | 11  | 21  | 13 | -0.3 | 1.2 | -0.7 | 1.7 | 1.77E-01 | 5.00E-05 | 9.84E-01 | 2.85E-04 |
| Robo1_chr16     | 1  | 1   | 2   | 1  | 0.0  | 1.0 | -0.7 | 1.6 | 4.70E-01 | 5.00E-05 | 1.00E+00 | 2.85E-04 |
| Rps6ka5_chr12   | 6  | 7   | 11  | 7  | 0.3  | 1.2 | -0.7 | 1.6 | 2.84E-01 | 5.00E-05 | 9.79E-01 | 2.85E-04 |
| Rrm2b_chr15     | 15 | 13  | 22  | 13 | -0.2 | 1.1 | -0.7 | 1.7 | 4.04E-01 | 5.00E-05 | 1.00E+00 | 2.85E-04 |
| Rsad1_chr11     | 2  | 1   | 3   | 2  | -0.6 | 1.5 | -0.8 | 1.8 | 9.05E-02 | 5.00E-05 | 9.27E-01 | 2.85E-04 |
| Rundc3b_chr5    | 2  | 2   | 3   | 2  | -0.3 | 1.2 | -0.6 | 1.5 | 3.62E-01 | 7.00E-04 | 9.98E-01 | 3.13E-03 |
| S1pr1_chr3      | 80 | 91  | 133 | 58 | 0.2  | 1.1 | -1.2 | 2.3 | 3.94E-01 | 5.00E-05 | 1.00E+00 | 2.85E-04 |
| S1pr3_chr13     | 14 | 15  | 28  | 12 | 0.1  | 1.1 | -1.3 | 2.4 | 7.16E-01 | 5.00E-05 | 1.00E+00 | 2.85E-04 |
| S1pr4_chr10     | 15 | 19  | 32  | 17 | 0.3  | 1.3 | -0.9 | 1.9 | 1.17E-01 | 5.00E-05 | 9.45E-01 | 2.85E-04 |
| Sash3_chrX      | 70 | 90  | 120 | 77 | 0.4  | 1.3 | -0.6 | 1.6 | 9.30E-02 | 1.00E-04 | 9.27E-01 | 5.44E-04 |
| Satb1_chr17     | 12 | 14  | 21  | 10 | 0.2  | 1.2 | -1.0 | 2.0 | 4.18E-01 | 3.89E-02 | 9.91E-01 | 7.54E-02 |
| Sbsn_chr7       | 1  | 1   | 2   | 0  | -0.4 | 1.3 | -0.7 | 1.6 | 4.42E-01 | 5.00E-05 | 1.00E+00 | 2.85E-04 |
| Scaper_chr9     | 5  | 6   | 10  | 6  | 0.1  | 1.1 | -0.7 | 1.6 | 5.26E-01 | 5.00E-05 | 1.00E+00 | 2.85E-04 |
| Scara3_chr14    | 2  | 3   | 5   | 3  | 0.3  | 1.2 | -0.7 | 1.6 | 4.23E-01 | 5.00E-05 | 1.00E+00 | 2.85E-04 |
| Scara5_chr14    | 1  | 1   | 2   | 1  | -0.2 | 1.2 | -1.2 | 2.3 | 5.84E-01 | 5.00E-05 | 1.00E+00 | 2.85E-04 |
| Scd1_chr19      | 97 | 120 | 187 | 77 | 0.3  | 1.2 | -1.3 | 2.4 | 2.36E-01 | 5.00E-05 | 9.91E-01 | 2.85E-04 |
| Scin_chr12      | 1  | 1   | 2   | 1  | 0.0  | 1.0 | -0.6 | 1.5 | 9.74E-01 | 5.00E-05 | 1.00E+00 | 2.85E-04 |
| Scml4_chr10     | 10 | 11  | 21  | 9  | 0.0  | 1.0 | -1.2 | 2.3 | 8.32E-01 | 5.00E-05 | 1.00E+00 | 2.85E-04 |
| Scn2b_chr9      | 3  | 3   | 5   | 2  | -0.1 | 1.1 | -1.3 | 2.5 | 7.67E-01 | 4.90E-03 | 1.00E+00 | 1.71E-02 |
| Scn4b_chr9      | 1  | 1   | 3   | 0  | -0.5 | 1.4 | -1.6 | 2.9 | 4.73E-03 | 5.00E-05 | 3.40E-01 | 2.85E-04 |
| Sdc4_chr2       | 23 | 34  | 39  | 22 | 0.6  | 1.5 | -0.8 | 1.8 | 4.15E-03 | 5.00E-05 | 3.16E-01 | 2.85E-04 |
| Sec16b_chr1     | 1  | 1   | 2   | 1  | 0.0  | 1.0 | -0.6 | 1.6 | 7.18E-01 | 4.95E-03 | 1.00E+00 | 1.62E-02 |
| Sema4f_chr6     | 2  | 2   | 4   | 2  | 0.2  | 1.1 | -0.9 | 1.9 | 6.90E-01 | 5.00E-05 | 1.00E+00 | 2.85E-04 |
| Sema5a_chr15    | 5  | 4   | 11  | 7  | -0.1 | 1.1 | -0.6 | 1.6 | 6.59E-01 | 5.00E-05 | 1.00E+00 | 2.85E-04 |
| Sema7a_chr9     | 11 | 13  | 23  | 15 | 0.2  | 1.2 | -0.6 | 1.5 | 2.73E-01 | 1.00E-04 | 9.94E-01 | 5.44E-04 |
| Setbp1_chr18    | 7  | 8   | 15  | 9  | 0.2  | 1.2 | -0.7 | 1.6 | 2.99E-01 | 5.00E-05 | 9.84E-01 | 2.85E-04 |
| Setx_chr2       | 21 | 20  | 43  | 26 | -0.1 | 1.1 | -0.7 | 1.6 | 6.72E-01 | 1.00E-04 | 1.00E+00 | 5.44E-04 |
| Sfmbt2_chr2     | 1  | 0   | 2   | 1  | 0.0  | 1.0 | -0.8 | 1.7 | 1.75E-01 | 5.00E-05 | 9.62E-01 | 2.49E-04 |
| Sgcd_chr11      | 1  | 1   | 2   | 1  | 0.0  | 1.0 | -1.1 | 2.2 | 8.66E-01 | 5.00E-05 | 1.00E+00 | 2.85E-04 |
| Sgpp2_chr1      | 1  | 1   | 2   | 1  | -0.1 | 1.1 | -0.7 | 1.6 | 7.85E-01 | 5.00E-05 | 1.00E+00 | 2.85E-04 |
| Sh3bp4_chr1     | 1  | 1   | 4   | 2  | -0.1 | 1.0 | -0.7 | 1.6 | 8.94E-01 | 5.00E-05 | 1.00E+00 | 2.85E-04 |
| Sh3bp5_chr14    | 54 | 66  | 95  | 48 | 0.3  | 1.2 | -1.0 | 2.0 | 1.81E-01 | 5.00E-05 | 9.85E-01 | 2.85E-04 |
| Sh3d19_chr3     | 2  | 2   | 3   | 2  | 0.3  | 1.2 | -0.8 | 1.7 | 3.55E-01 | 5.00E-05 | 9.98E-01 | 2.85E-04 |
| Sh3pxd2a_chr19  | 13 | 12  | 31  | 13 | -0.1 | 1.1 | -1.2 | 2.4 | 6.60E-01 | 5.00E-05 | 1.00E+00 | 2.85E-04 |
| Sh3pxd2b_chr11  | 2  | 1   | 4   | 2  | -0.3 | 1.3 | -0.8 | 1.7 | 2.94E-01 | 5.00E-05 | 9.83E-01 | 2.85E-04 |
| Shisa2_chr14    | 3  | 3   | 5   | 3  | 0.4  | 1.3 | -0.8 | 1.8 | 1.77E-01 | 5.00E-05 | 9.84E-01 | 2.85E-04 |
| Shroom3_chr5    | 2  | 3   | 3   | 2  | 0.3  | 1.3 | -0.8 | 1.8 | 2.87E-01 | 3.92E-02 | 9.81E-01 | 8.91E-02 |
| Sit1_chr4       | 5  | 5   | 7   | 3  | 0.0  | 1.0 | -1.0 | 1.9 | 9.60E-01 | 5.00E-05 | 1.00E+00 | 2.85E-04 |
| Ski_chr4        | 16 | 17  | 43  | 27 | 0.1  | 1.1 | -0.7 | 1.6 | 6.85E-01 | 5.00E-05 | 1.00E+00 | 2.85E-04 |
| Skil_chr3       | 10 | 10  | 18  | 12 | 0.0  | 1.0 | -0.6 | 1.5 | 8.90E-01 | 7.38E-03 | 1.00E+00 | 2.39E-02 |
| Slain1_chr14    | 6  | 7   | 12  | 7  | 0.4  | 1.3 | -0.7 | 1.7 | 1.87E-01 | 5.00E-05 | 9.86E-01 | 2.85E-04 |
| Slamf6_chr1     | 40 | 32  | 51  | 17 | -0.3 | 1.3 | -1.6 | 2.9 | 1.18E-01 | 5.00E-05 | 8.67E-01 | 2.85E-04 |
| Slc16a2_chrX    | 2  | 1   | 4   | 2  | -0.1 | 1.0 | -1.2 | 2.2 | 8.55E-01 | 5.00E-05 | 1.00E+00 | 2.85E-04 |
| Slc16a5_chr11   | 1  | 1   | 2   | 1  | -0.3 | 1.2 | -0.6 | 1.5 | 4.79E-01 | 1.35E-03 | 1.00E+00 | 5.55E-03 |
| Slc1a2_chr2     | 1  | 1   | 2   | 1  | -0.1 | 1.1 | -0.9 | 1.8 | 7.59E-01 | 5.00E-05 | 1.00E+00 | 2.85E-04 |
| Slc1a5_chr7     | 58 | 48  | 88  | 43 | -0.3 | 1.2 | -1.1 | 2.1 | 1.99E-01 | 5.00E-05 | 9.87E-01 | 2.85E-04 |
| Slc22a3_chr17   | 2  | 1   | 3   | 2  | -0.1 | 1.1 | -0.9 | 1.8 | 8.49E-01 | 5.00E-05 | 1.00E+00 | 2.85E-04 |
| Slc25a27_chr17  | 2  | 1   | 3   | 2  | -0.7 | 1.6 | -0.8 | 1.7 | 1.04E-01 | 5.00E-05 | 9.38E-01 | 2.85E-04 |
| Slc25a29_chr12  | 1  | 2   | 2   | 1  | 0.5  | 1.4 | -0.7 | 1.6 | 3.25E-01 | 6.50E-04 | 9.98E-01 | 2.93E-03 |
| Slc25a53_chrX   | 13 | 13  | 15  | 10 | 0.1  | 1.1 | -0.6 | 1.5 | 7.92E-01 | 5.53E-03 | 1.00E+00 | 1.90E-02 |
| Slc2a1_chr4     | 14 | 19  | 30  | 15 | 0.4  | 1.3 | -0.9 | 1.9 | 8.43E-02 | 5.00E-05 | 9.17E-01 | 2.85E-04 |
| Slc2a9_chr5     | 2  | 2   | 3   | 2  | 0.0  | 1.0 | -0.8 | 1.7 | 9.53E-01 | 7.50E-05 | 1.00E+00 | 3.94E-04 |
| Slc36a2_chr11   | 1  | 1   | 3   | 1  | -0.2 | 1.1 | -1.5 | 2.8 | 7.23E-01 | 5.00E-05 | 1.00E+00 | 2.85E-04 |
| Slc41a2_chr10   | 3  | 3   | 5   | 3  | 0.3  | 1.2 | -0.8 | 1.8 | 3.36E-01 | 5.00E-05 | 9.98E-01 | 2.85E-04 |
| Slc4a7_chr14    | 13 | 14  | 21  | 13 | 0.1  | 1.0 | -0.7 | 1.7 | 7.56E-01 | 5.00E-05 | 1.00E+00 | 2.85E-04 |
| Slc4a8_chr15    | 2  | 2   | 4   | 3  | -0.1 | 1.1 | -0.6 | 1.6 | 7.43E-01 | 5.00E-05 | 1.00E+00 | 2.85E-04 |
| Slc5a6_chr5     | 2  | 2   | 3   | 2  | 0.2  | 1.1 | -0.7 | 1.6 | 6.93E-01 | 4.06E-02 | 1.00E+00 | 9.85E-02 |
| Slc7a11_chr3    | 2  | 1   | 4   | 2  | -0.9 | 1.9 | -1.2 | 2.2 | 3.35E-07 | 5.00E-05 | 1.76E-04 | 2.85E-04 |
| Slc7a2_chr8     | 10 | 7   | 19  | 10 | -0.5 | 1.4 | -0.9 | 1.8 | 2.13E-02 | 5.00E-05 | 5.34E-01 | 2.85E-04 |
| Sifn10-ps_chr11 | 3  | 2   | 6   | 3  | -0.6 | 1.5 | -0.9 | 1.9 | 6.69E-02 | 5.00E-05 | 7.70E-01 | 2.85E-04 |
| Smad3_chr9      | 11 | 13  | 25  | 17 | 0.2  | 1.2 | -0.6 | 1.5 | 3.13E-01 | 5.00E-05 | 9.97E-01 | 2.85E-04 |
| Smad4_chr18     | 18 | 20  | 38  | 24 | 0.2  | 1.1 | -0.6 | 1.6 | 4.39E-01 | 5.00E-05 | 1.00E+00 | 2.85E-04 |
| Smad7_chr18     | 6  | 6   | 12  | 7  | 0.1  | 1.1 | -0.8 | 1.7 | 7.12E-01 | 5.00E-05 | 1.00E+00 | 2.85E-04 |
| Smim14_chr5     | 37 | 49  | 53  | 33 | 0.4  | 1.3 | -0.7 | 1.6 | 4.96E-02 | 5.00E-05 | 8.46E-01 | 2.85E-04 |

|                |    |     |     |    |      |     |      |     |          |          |          |          |
|----------------|----|-----|-----|----|------|-----|------|-----|----------|----------|----------|----------|
| Smurf1_chr5    | 5  | 5   | 12  | 6  | 0.1  | 1.1 | -0.9 | 1.9 | 7.86E-01 | 1.12E-03 | 1.00E+00 | 4.47E-03 |
| Snai2_chr16    | 1  | 1   | 2   | 1  | 0.3  | 1.2 | -0.6 | 1.5 | 5.96E-01 | 7.05E-03 | 1.00E+00 | 2.32E-02 |
| Snn_chr16      | 87 | 97  | 129 | 74 | 0.2  | 1.1 | -0.8 | 1.7 | 5.21E-01 | 1.00E-04 | 1.00E+00 | 5.44E-04 |
| Sntb1_chr15    | 3  | 2   | 7   | 4  | -0.3 | 1.2 | -0.9 | 1.8 | 4.96E-01 | 5.00E-05 | 1.00E+00 | 2.85E-04 |
| Snx29_chr16    | 8  | 10  | 23  | 13 | 0.2  | 1.1 | -0.8 | 1.8 | 4.68E-01 | 5.00E-05 | 1.00E+00 | 2.85E-04 |
| Snx30_chr4     | 15 | 17  | 30  | 19 | 0.2  | 1.2 | -0.7 | 1.6 | 3.27E-01 | 5.00E-05 | 9.98E-01 | 2.85E-04 |
| Snx6_chr12     | 26 | 25  | 35  | 22 | -0.1 | 1.0 | -0.6 | 1.6 | 7.73E-01 | 5.00E-05 | 1.00E+00 | 2.85E-04 |
| Sorcs2_chr5    | 1  | 1   | 2   | 1  | 0.0  | 1.0 | -0.9 | 1.8 | 9.57E-01 | 5.00E-05 | 1.00E+00 | 2.85E-04 |
| Spns2_chr11    | 11 | 13  | 24  | 11 | 0.2  | 1.2 | -1.1 | 2.2 | 3.33E-01 | 5.00E-05 | 9.98E-01 | 2.85E-04 |
| Sptan1_chr2    | 24 | 27  | 59  | 37 | 0.2  | 1.1 | -0.7 | 1.6 | 5.84E-01 | 2.17E-02 | 1.00E+00 | 5.39E-02 |
| Sptbn1_chr11   | 24 | 26  | 59  | 35 | -0.1 | 1.1 | -0.7 | 1.7 | 4.95E-01 | 3.36E-02 | 1.00E+00 | 7.61E-02 |
| Srgap3_chr6    | 3  | 3   | 7   | 3  | -0.1 | 1.1 | -1.0 | 2.1 | 6.80E-01 | 5.00E-05 | 1.00E+00 | 2.85E-04 |
| Srms_chr2      | 1  | 1   | 2   | 1  | 0.0  | 1.0 | -0.8 | 1.7 | 6.64E-01 | 5.00E-05 | 1.00E+00 | 2.85E-04 |
| Sspn_chr6      | 3  | 3   | 6   | 3  | -0.1 | 1.1 | -0.8 | 1.7 | 6.08E-01 | 5.00E-05 | 1.00E+00 | 2.85E-04 |
| Ssu2_chr6      | 1  | 1   | 2   | 1  | 0.0  | 1.0 | -0.6 | 1.5 | 7.45E-01 | 1.50E-04 | 1.00E+00 | 7.89E-04 |
| St6gal1_chr16  | 32 | 44  | 54  | 29 | 0.4  | 1.3 | -0.9 | 1.9 | 1.19E-01 | 1.88E-03 | 8.97E-01 | 6.80E-03 |
| Stac2_chr11    | 3  | 5   | 7   | 4  | 0.6  | 1.5 | -0.9 | 1.8 | 4.66E-02 | 5.00E-05 | 8.39E-01 | 2.85E-04 |
| Stambpl1_chr19 | 8  | 9   | 11  | 6  | 0.2  | 1.1 | -0.8 | 1.7 | 5.31E-01 | 5.00E-05 | 1.00E+00 | 2.85E-04 |
| Star_chr8      | 25 | 16  | 41  | 27 | -0.7 | 1.6 | -0.6 | 1.5 | 1.07E-03 | 5.00E-05 | 9.04E-02 | 2.85E-04 |
| Stau2_chr1     | 2  | 2   | 3   | 1  | -0.5 | 1.4 | -0.8 | 1.8 | 3.30E-01 | 2.08E-03 | 9.95E-01 | 7.69E-03 |
| Stbd1_chr5     | 1  | 1   | 2   | 1  | 0.2  | 1.2 | -0.8 | 1.8 | 6.49E-01 | 2.00E-04 | 1.00E+00 | 1.02E-03 |
| Stk10_chr11    | 40 | 49  | 93  | 53 | 0.3  | 1.2 | -0.8 | 1.8 | 1.96E-01 | 5.00E-05 | 9.87E-01 | 2.85E-04 |
| Stk11ip_chr1   | 13 | 14  | 26  | 16 | 0.1  | 1.1 | -0.7 | 1.6 | 5.51E-01 | 5.00E-05 | 1.00E+00 | 2.85E-04 |
| Stk38l_chr6    | 5  | 5   | 8   | 5  | -0.1 | 1.0 | -0.7 | 1.6 | 7.99E-01 | 5.00E-05 | 1.00E+00 | 2.85E-04 |
| Stk4_chr2      | 53 | 59  | 101 | 65 | 0.2  | 1.1 | -0.6 | 1.5 | 5.10E-01 | 2.50E-04 | 1.00E+00 | 1.25E-03 |
| Ston1_chr17    | 7  | 6   | 17  | 10 | -0.3 | 1.2 | -0.8 | 1.7 | 2.94E-01 | 5.00E-05 | 9.83E-01 | 2.85E-04 |
| Strbp_chr2     | 8  | 7   | 12  | 7  | 0.0  | 1.0 | -0.7 | 1.6 | 8.36E-01 | 5.00E-05 | 1.00E+00 | 2.85E-04 |
| Stxbp1_chr2    | 4  | 4   | 10  | 6  | -0.2 | 1.2 | -0.7 | 1.6 | 4.50E-01 | 5.00E-05 | 1.00E+00 | 2.85E-04 |
| Sufu_chr19     | 6  | 7   | 14  | 8  | 0.2  | 1.1 | -0.7 | 1.7 | 3.97E-01 | 1.33E-03 | 1.00E+00 | 5.57E-03 |
| Sulf1_chr1     | 2  | 1   | 4   | 2  | -1.1 | 2.1 | -1.5 | 2.9 | 1.35E-02 | 5.00E-05 | 4.19E-01 | 2.72E-04 |
| Swap70_chr7    | 72 | 102 | 133 | 86 | 0.5  | 1.4 | -0.6 | 1.5 | 3.54E-02 | 5.50E-04 | 7.70E-01 | 2.52E-03 |
| Syk_chr13      | 68 | 83  | 141 | 83 | 0.3  | 1.2 | -0.8 | 1.7 | 3.98E-01 | 5.95E-03 | 9.97E-01 | 1.92E-02 |
| Synj2_chr17    | 2  | 2   | 5   | 2  | 0.2  | 1.1 | -1.2 | 2.3 | 6.67E-01 | 5.00E-05 | 1.00E+00 | 2.85E-04 |
| Taf1b_chr12    | 9  | 10  | 6   | 2  | 0.2  | 1.2 | -1.9 | 3.8 | 5.35E-01 | 2.50E-04 | 1.00E+00 | 1.42E-03 |
| Tagln_chr9     | 40 | 39  | 44  | 22 | 0.0  | 1.0 | -1.0 | 2.0 | 9.08E-01 | 1.80E-03 | 1.00E+00 | 7.14E-03 |
| Tbc1d1_chr5    | 13 | 14  | 28  | 19 | 0.1  | 1.1 | -0.6 | 1.5 | 5.57E-01 | 5.00E-05 | 1.00E+00 | 2.85E-04 |
| Tbc1d10c_chr19 | 73 | 83  | 102 | 67 | 0.2  | 1.1 | -0.6 | 1.5 | 3.70E-01 | 1.00E-04 | 1.00E+00 | 5.44E-04 |
| Tbc1d30_chr10  | 2  | 2   | 4   | 1  | 0.1  | 1.1 | -1.5 | 2.8 | 7.38E-01 | 5.00E-05 | 1.00E+00 | 2.85E-04 |
| Tbx3_chr5      | 1  | 1   | 2   | 1  | 0.0  | 1.0 | -0.6 | 1.5 | 7.99E-01 | 5.00E-05 | 1.00E+00 | 2.61E-04 |
| Tcf7_chr11     | 48 | 51  | 100 | 49 | 0.1  | 1.1 | -1.0 | 2.0 | 7.32E-01 | 5.00E-05 | 1.00E+00 | 2.85E-04 |
| Tcp111_chr2    | 1  | 1   | 4   | 2  | -0.4 | 1.4 | -0.7 | 1.6 | 2.89E-01 | 5.00E-05 | 9.81E-01 | 2.85E-04 |
| Tctn2_chr5     | 1  | 1   | 2   | 1  | 0.0  | 1.0 | -0.7 | 1.7 | 6.83E-01 | 5.50E-04 | 1.00E+00 | 2.52E-03 |
| Tead3_chr17    | 1  | 0   | 2   | 1  | 0.0  | 1.0 | -0.6 | 1.5 | 5.18E-01 | 4.75E-02 | 1.00E+00 | 1.15E-01 |
| Tec_chr5       | 13 | 16  | 19  | 11 | 0.4  | 1.3 | -0.8 | 1.8 | 2.89E-01 | 7.77E-03 | 9.85E-01 | 2.27E-02 |
| Tecpr1_chr5    | 16 | 16  | 36  | 22 | 0.1  | 1.0 | -0.7 | 1.6 | 7.67E-01 | 5.00E-05 | 1.00E+00 | 2.85E-04 |
| Tenc1_chr15    | 11 | 8   | 29  | 19 | -0.4 | 1.3 | -0.6 | 1.5 | 6.15E-02 | 1.00E-04 | 8.76E-01 | 5.44E-04 |
| Tet1_chr10     | 1  | 1   | 2   | 1  | 0.0  | 1.0 | -0.9 | 1.8 | 2.92E-02 | 5.00E-05 | 6.20E-01 | 2.85E-04 |
| Tgfb3_chr5     | 8  | 9   | 20  | 13 | 0.1  | 1.1 | -0.6 | 1.5 | 6.11E-01 | 5.00E-05 | 1.00E+00 | 2.85E-04 |
| Thbs2_chr17    | 4  | 5   | 10  | 6  | 0.2  | 1.2 | -0.9 | 1.9 | 3.98E-01 | 5.00E-05 | 1.00E+00 | 2.85E-04 |
| Them4_chr3     | 2  | 1   | 2   | 1  | -0.1 | 1.1 | -0.7 | 1.6 | 8.19E-01 | 2.85E-03 | 1.00E+00 | 1.07E-02 |
| Themis_chr10   | 8  | 6   | 13  | 6  | -0.5 | 1.4 | -1.0 | 2.0 | 5.38E-02 | 5.00E-05 | 7.38E-01 | 2.85E-04 |
| Thrsp_chr7     | 1  | 1   | 2   | 1  | -0.3 | 1.3 | -0.7 | 1.6 | 4.30E-01 | 1.65E-03 | 1.00E+00 | 6.61E-03 |
| Thy1_chr9      | 24 | 32  | 36  | 21 | 0.4  | 1.3 | -0.8 | 1.7 | 6.45E-02 | 5.00E-05 | 7.70E-01 | 2.85E-04 |
| Timp3_chr10    | 29 | 29  | 52  | 34 | 0.0  | 1.0 | -0.6 | 1.5 | 9.60E-01 | 5.00E-05 | 1.00E+00 | 2.85E-04 |
| Tlr11_chr14    | 8  | 6   | 11  | 7  | -0.5 | 1.4 | -0.7 | 1.6 | 7.82E-02 | 1.00E-04 | 9.04E-01 | 5.44E-04 |
| Tlr3_chr8      | 7  | 6   | 12  | 7  | -0.3 | 1.2 | -0.7 | 1.6 | 2.46E-01 | 5.00E-05 | 9.92E-01 | 2.85E-04 |
| Tmed8_chr12    | 16 | 18  | 30  | 19 | 0.1  | 1.1 | -0.6 | 1.5 | 6.05E-01 | 2.50E-04 | 1.00E+00 | 1.25E-03 |
| Tmem163_chr1   | 3  | 4   | 4   | 2  | 0.4  | 1.3 | -1.3 | 2.4 | 2.61E-01 | 5.00E-05 | 9.94E-01 | 2.85E-04 |
| Tmem200b_chr4  | 2  | 2   | 4   | 2  | -0.2 | 1.2 | -1.2 | 2.4 | 6.08E-01 | 5.00E-05 | 1.00E+00 | 2.85E-04 |
| Tmem98_chr11   | 3  | 4   | 6   | 4  | 0.4  | 1.3 | -0.6 | 1.6 | 3.06E-01 | 4.00E-04 | 9.96E-01 | 1.91E-03 |
| Tmtc1_chr6     | 2  | 2   | 5   | 3  | -0.2 | 1.2 | -0.8 | 1.7 | 5.71E-01 | 3.09E-02 | 1.00E+00 | 8.01E-02 |
| Tnfrsf1b_chr4  | 17 | 4   | 37  | 7  | -2.2 | 4.6 | -2.4 | 5.3 | 1.00E-20 | 5.00E-05 | 1.00E-20 | 2.85E-04 |
| Tnfrsf22_chr7  | 3  | 3   | 5   | 3  | 0.2  | 1.2 | -0.7 | 1.6 | 5.20E-01 | 2.00E-04 | 1.00E+00 | 1.02E-03 |
| Tnfrsf25_chr4  | 3  | 3   | 4   | 2  | 0.0  | 1.0 | -0.7 | 1.7 | 9.18E-01 | 1.50E-04 | 1.00E+00 | 7.89E-04 |
| Tnik_chr3      | 4  | 5   | 7   | 4  | 0.1  | 1.1 | -1.0 | 2.0 | 7.46E-01 | 8.00E-04 | 1.00E+00 | 3.37E-03 |
| Tnn_chr1       | 3  | 1   | 8   | 2  | -1.6 | 3.1 | -2.1 | 4.3 | 1.82E-09 | 5.00E-05 | 9.93E-07 | 2.85E-04 |
| Tnrc6c_chr11   | 14 | 13  | 29  | 18 | 0.0  | 1.0 | -0.7 | 1.6 | 8.37E-01 | 5.00E-05 | 1.00E+00 | 2.85E-04 |
| Tnxb_chr17     | 14 | 11  | 41  | 20 | -0.3 | 1.2 | -1.0 | 2.0 | 1.87E-01 | 5.00E-05 | 9.86E-01 | 2.85E-04 |
| Tox_chr4       | 3  | 3   | 5   | 3  | 0.2  | 1.1 | -1.0 | 2.0 | 6.26E-01 | 5.00E-05 | 1.00E+00 | 2.85E-04 |
| Tpm2_chr4      | 4  | 5   | 5   | 3  | 0.2  | 1.2 | -0.8 | 1.7 | 5.08E-01 | 5.00E-05 | 1.00E+00 | 2.85E-04 |
| Traf3ip2_chr10 | 8  | 10  | 17  | 9  | 0.3  | 1.2 | -0.9 | 1.9 | 2.12E-01 | 5.00E-05 | 9.88E-01 | 2.85E-04 |
| Traf3ip3_chr1  | 61 | 62  | 89  | 57 | 0.0  | 1.0 | -0.6 | 1.5 | 9.07E-01 | 2.00E-04 | 1.00E+00 | 1.02E-03 |
| Traf5_chr1     | 17 | 23  | 38  | 21 | 0.4  | 1.3 | -0.9 | 1.8 | 1.25E-01 | 5.00E-05 | 9.50E-01 | 2.85E-04 |
| Trib2_chr12    | 13 | 13  | 23  | 11 | -0.1 | 1.0 | -1.1 | 2.1 | 7.66E-01 | 5.00E-05 | 1.00E+00 | 2.85E-04 |
| Trim34b_chr7   | 5  | 4   | 8   | 1  | -0.2 | 1.1 | -2.6 | 5.9 | 6.37E-01 | 5.00E-05 | 1.00E+00 | 2.85E-04 |
| Trim35_chr14   | 28 | 34  | 56  | 35 | 0.3  | 1.2 | -0.7 | 1.6 | 1.42E-01 | 5.00E-05 | 9.65E-01 | 2.85E-04 |
| Trim36_chr18   | 3  | 3   | 5   | 3  | 0.2  | 1.1 | -0.8 | 1.7 | 5.77E-01 | 5.00E-05 | 1.00E+00 | 2.85E-04 |
| Trim68_chr7    | 7  | 7   | 11  | 5  | 0.0  | 1.0 | -1.1 | 2.1 | 9.23E-01 | 5.00E-05 | 1.00E+00 | 2.85E-04 |
| Trp53i11_chr2  | 32 | 42  | 66  | 42 | 0.4  | 1.3 | -0.7 | 1.6 | 6.85E-02 | 5.00E-05 | 8.77E-01 | 2.85E-04 |
| Tspan15_chr10  | 8  | 9   | 13  | 7  | 0.2  | 1.2 | -0.9 | 1.9 | 3.62E-01 | 5.00E-05 | 9.98E-01 | 2.85E-04 |
| Ttc28_chr5     | 4  | 5   | 13  | 7  | 0.1  | 1.1 | -0.8 | 1.8 | 5.26E-01 | 5.00E-05 | 1.00E+00 | 2.85E-04 |
| Tubb2b_chr13   | 3  | 3   | 4   | 2  | -0.3 | 1.2 | -0.8 | 1.8 | 4.06E-01 | 5.00E-05 | 1.00E+00 | 2.85E-04 |
| Tubg2_chr11    | 2  | 2   | 2   | 1  | 0.4  | 1.3 | -0.7 | 1.6 | 3.94E-01 | 1.45E-03 | 1.00E+00 | 5.90E-03 |

|                     |     |     |     |     |      |     |      |     |          |          |          |          |
|---------------------|-----|-----|-----|-----|------|-----|------|-----|----------|----------|----------|----------|
| Txk_chr5            | 7   | 7   | 10  | 6   | -0.1 | 1.0 | -0.6 | 1.5 | 8.41E-01 | 2.38E-04 | 1.00E+00 | 1.17E-03 |
| Txnip_chr3          | 123 | 150 | 206 | 122 | 0.3  | 1.2 | -0.8 | 1.7 | 4.14E-01 | 4.07E-03 | 9.98E-01 | 1.44E-02 |
| Ube2d1_chr10        | 17  | 22  | 21  | 13  | 0.4  | 1.3 | -0.6 | 1.6 | 1.30E-01 | 5.00E-05 | 9.55E-01 | 2.85E-04 |
| Ubt2_chr11          | 3   | 3   | 5   | 3   | 0.0  | 1.0 | -0.6 | 1.5 | 9.47E-01 | 2.00E-04 | 1.00E+00 | 1.02E-03 |
| Upb1_chr10          | 1   | 1   | 2   | 1   | -0.1 | 1.1 | -0.6 | 1.5 | 7.92E-01 | 5.00E-05 | 1.00E+00 | 2.85E-04 |
| Usp28_chr9          | 7   | 7   | 13  | 8   | -0.1 | 1.0 | -0.8 | 1.7 | 8.30E-01 | 5.00E-05 | 1.00E+00 | 2.85E-04 |
| Usp53_chr3          | 4   | 3   | 7   | 4   | -0.1 | 1.1 | -0.8 | 1.7 | 6.42E-01 | 5.00E-05 | 1.00E+00 | 2.85E-04 |
| Utp14b_chr1         | 3   | 3   | 5   | 3   | 0.2  | 1.2 | -0.8 | 1.7 | 5.91E-01 | 1.41E-03 | 1.00E+00 | 5.76E-03 |
| Utrn_chr10          | 13  | 11  | 28  | 17  | -0.2 | 1.1 | -0.7 | 1.6 | 3.88E-01 | 5.00E-05 | 1.00E+00 | 2.85E-04 |
| Vamp1_chr6          | 22  | 24  | 28  | 18  | 0.1  | 1.0 | -0.6 | 1.6 | 7.47E-01 | 5.00E-05 | 1.00E+00 | 2.85E-04 |
| Vangl2_chr1         | 1   | 1   | 3   | 2   | 0.6  | 1.5 | -0.6 | 1.5 | 1.41E-01 | 3.55E-03 | 9.65E-01 | 1.29E-02 |
| Vldlr_chr19         | 2   | 2   | 4   | 1   | -0.5 | 1.4 | -2.1 | 4.4 | 1.14E-01 | 5.00E-05 | 9.01E-01 | 2.61E-04 |
| Vmn2r84_chr10       | 1   | 1   | 2   | 1   | 0.0  | 1.0 | -0.6 | 1.6 | 3.34E-01 | 5.00E-05 | 9.98E-01 | 2.85E-04 |
| Wdfy4_chr14         | 50  | 54  | 140 | 78  | 0.1  | 1.1 | -0.8 | 1.8 | 6.99E-01 | 5.00E-05 | 1.00E+00 | 2.85E-04 |
| Wnt5a_chr14         | 1   | 2   | 2   | 1   | 0.3  | 1.3 | -0.6 | 1.6 | 4.65E-01 | 4.23E-03 | 1.00E+00 | 1.44E-02 |
| Wwc2_chr8           | 3   | 3   | 6   | 4   | 0.0  | 1.0 | -0.7 | 1.6 | 9.77E-01 | 5.00E-05 | 1.00E+00 | 2.85E-04 |
| Xcr1_chr9           | 5   | 3   | 6   | 3   | -0.8 | 1.8 | -0.9 | 1.9 | 3.07E-03 | 5.00E-05 | 2.63E-01 | 2.85E-04 |
| Xrcc6bp1_chr10      | 2   | 2   | 4   | 2   | 0.0  | 1.0 | -1.1 | 2.2 | 9.41E-01 | 5.00E-05 | 1.00E+00 | 2.85E-04 |
| Xylt1_chr7          | 4   | 4   | 12  | 7   | 0.2  | 1.1 | -0.7 | 1.7 | 6.02E-01 | 5.00E-05 | 1.00E+00 | 2.85E-04 |
| Xylt2_chr11         | 5   | 5   | 11  | 7   | -0.1 | 1.1 | -0.6 | 1.5 | 6.70E-01 | 3.00E-04 | 1.00E+00 | 1.47E-03 |
| Zbtb10_chr3         | 3   | 3   | 5   | 2   | 0.0  | 1.0 | -0.9 | 1.9 | 9.29E-01 | 5.00E-05 | 1.00E+00 | 2.85E-04 |
| Zbtb4_chr11         | 16  | 17  | 31  | 18  | 0.1  | 1.1 | -0.8 | 1.7 | 6.19E-01 | 5.00E-05 | 1.00E+00 | 2.85E-04 |
| Zbtb8a_chr4         | 2   | 1   | 3   | 2   | -0.4 | 1.4 | -0.7 | 1.7 | 3.19E-01 | 2.50E-04 | 9.97E-01 | 1.25E-03 |
| Zcchc11_chr4        | 27  | 30  | 50  | 31  | 0.1  | 1.1 | -0.7 | 1.6 | 5.60E-01 | 5.00E-05 | 1.00E+00 | 2.85E-04 |
| Zfp109_chr7         | 1   | 1   | 2   | 1   | 0.0  | 1.0 | -0.7 | 1.7 | 3.74E-01 | 5.00E-04 | 1.00E+00 | 2.32E-03 |
| Zfp235_chr7         | 2   | 2   | 3   | 2   | -0.1 | 1.0 | -0.7 | 1.6 | 8.52E-01 | 1.00E-04 | 1.00E+00 | 5.44E-04 |
| Zfp239_chr6         | 2   | 1   | 3   | 2   | -0.3 | 1.3 | -0.6 | 1.6 | 5.34E-01 | 7.66E-03 | 8.94E-01 | 2.39E-02 |
| Zfp27_chr7          | 2   | 2   | 3   | 2   | 0.1  | 1.1 | -0.6 | 1.5 | 7.78E-01 | 1.43E-03 | 1.00E+00 | 5.90E-03 |
| Zfp275_chrX         | 7   | 6   | 9   | 6   | -0.1 | 1.1 | -0.6 | 1.5 | 6.79E-01 | 2.58E-02 | 1.00E+00 | 6.97E-02 |
| Zfp296_chr7         | 4   | 5   | 6   | 4   | 0.3  | 1.2 | -0.7 | 1.6 | 4.50E-01 | 1.50E-04 | 1.00E+00 | 7.89E-04 |
| Zfp318_chr17        | 19  | 18  | 17  | 6   | -0.2 | 1.1 | -1.5 | 2.9 | 6.22E-01 | 9.00E-04 | 1.00E+00 | 4.23E-03 |
| Zfp354c_chr11       | 2   | 2   | 3   | 2   | -0.3 | 1.2 | -0.8 | 1.7 | 4.02E-01 | 5.00E-05 | 1.00E+00 | 2.85E-04 |
| Zfp362_chr4         | 14  | 13  | 27  | 16  | -0.1 | 1.1 | -0.7 | 1.7 | 5.98E-01 | 5.00E-05 | 1.00E+00 | 2.85E-04 |
| Zfp420_chr7         | 4   | 4   | 5   | 3   | -0.1 | 1.1 | -0.7 | 1.6 | 7.15E-01 | 1.50E-04 | 1.00E+00 | 7.89E-04 |
| Zfp46_chr4          | 4   | 3   | 7   | 4   | -0.3 | 1.2 | -0.8 | 1.8 | 3.37E-01 | 5.00E-05 | 9.98E-01 | 2.85E-04 |
| Zfp462_chr4         | 1   | 1   | 2   | 1   | 0.0  | 1.0 | -0.6 | 1.5 | 6.56E-01 | 2.00E-04 | 1.00E+00 | 1.02E-03 |
| Zfp60_chr7          | 6   | 7   | 9   | 6   | 0.1  | 1.1 | -0.6 | 1.5 | 6.11E-01 | 7.50E-05 | 1.00E+00 | 4.28E-04 |
| Zfp651_chr9         | 1   | 1   | 2   | 1   | 0.0  | 1.0 | -0.6 | 1.5 | 6.57E-01 | 2.50E-04 | 1.00E+00 | 1.25E-03 |
| Zfp747_chr7         | 3   | 4   | 5   | 3   | 0.3  | 1.2 | -0.6 | 1.5 | 3.56E-01 | 2.00E-04 | 9.98E-01 | 1.02E-03 |
| Zfp764_chr7         | 4   | 4   | 5   | 3   | 0.1  | 1.0 | -0.7 | 1.6 | 8.46E-01 | 7.50E-04 | 1.00E+00 | 3.39E-03 |
| Zfp82_chr7          | 3   | 3   | 4   | 2   | 0.1  | 1.1 | -1.4 | 2.7 | 8.13E-01 | 5.00E-05 | 1.00E+00 | 2.85E-04 |
| Zfp827_chr8         | 2   | 2   | 4   | 2   | -0.2 | 1.2 | -1.1 | 2.2 | 3.95E-01 | 5.00E-05 | 1.00E+00 | 2.85E-04 |
| Zfp868_chr8         | 28  | 16  | 20  | 6   | -0.9 | 1.8 | -2.2 | 4.5 | 1.68E-04 | 5.00E-05 | 2.20E-02 | 2.85E-04 |
| Zfp949_chr9         | 27  | 23  | 37  | 5   | -0.3 | 1.2 | -3.2 | 9.4 | 3.37E-01 | 5.00E-05 | 9.95E-01 | 2.85E-04 |
| Zfp964_chr8         | 1   | 1   | 2   | 1   | -0.1 | 1.1 | -0.8 | 1.7 | 7.61E-01 | 5.00E-05 | 1.00E+00 | 2.85E-04 |
| Zhx2_chr15          | 7   | 10  | 18  | 11  | 0.4  | 1.4 | -0.8 | 1.7 | 4.68E-02 | 5.00E-05 | 8.39E-01 | 2.85E-04 |
| Znf41-ps_chr4       | 5   | 1   | 6   | 2   | -2.2 | 4.6 | -1.5 | 2.9 | 2.67E-08 | 5.00E-05 | 1.70E-05 | 2.82E-04 |
| Zpbp_chr11          | 1   | 1   | 2   | 1   | 0.0  | 1.0 | -0.7 | 1.6 | 7.78E-01 | 3.50E-04 | 1.00E+00 | 1.56E-03 |
| Zscan2_chr7         | 2   | 2   | 3   | 2   | 0.1  | 1.1 | -0.6 | 1.6 | 8.43E-01 | 6.50E-04 | 1.00E+00 | 2.93E-03 |
| Zscan20_chr4        | 3   | 3   | 6   | 4   | 0.2  | 1.2 | -0.7 | 1.6 | 4.50E-01 | 5.00E-05 | 1.00E+00 | 2.85E-04 |
| Zyg11b_chr4         | 8   | 8   | 16  | 11  | -0.1 | 1.1 | -0.6 | 1.5 | 6.35E-01 | 5.00E-05 | 1.00E+00 | 2.85E-04 |
| 1700049G17Rik_chr7  | 3   | 3   | 4   | 2   | 0.0  | 1.0 | -1.2 | 2.4 | 8.61E-01 | 5.00E-05 | 1.00E+00 | 2.85E-04 |
| 4632428C04Rik_chr16 | 3   | 3   | 5   | 2   | 0.1  | 1.1 | -0.9 | 1.9 | 6.97E-01 | 5.00E-05 | 1.00E+00 | 2.82E-04 |
| A430078G23Rik_chr8  | 19  | 18  | 39  | 20  | -0.1 | 1.0 | -1.0 | 1.9 | 7.52E-01 | 5.00E-05 | 1.00E+00 | 2.85E-04 |
| Adamts6_chr13       | 3   | 3   | 7   | 3   | 0.0  | 1.0 | -1.0 | 2.0 | 9.87E-01 | 5.00E-05 | 1.00E+00 | 2.85E-04 |
| Add3_chr19          | 22  | 31  | 27  | 7   | 0.5  | 1.4 | -1.9 | 3.9 | 2.72E-01 | 3.50E-04 | 9.38E-01 | 1.92E-03 |
| Adm_chr7            | 1   | 1   | 2   | 1   | -0.4 | 1.4 | -0.8 | 1.8 | 3.94E-01 | 5.00E-05 | 1.00E+00 | 2.85E-04 |
| Aff3_chr1           | 12  | 17  | 31  | 13  | 0.5  | 1.4 | -1.2 | 2.3 | 2.53E-02 | 5.00E-05 | 5.78E-01 | 2.85E-04 |
| Agpat9_chr5         | 2   | 3   | 3   | 2   | 0.3  | 1.3 | -0.9 | 1.9 | 3.46E-01 | 5.00E-05 | 9.98E-01 | 2.85E-04 |
| Ankrd37_chr8        | 3   | 4   | 3   | 2   | 0.4  | 1.3 | -0.6 | 1.5 | 4.27E-01 | 7.80E-03 | 1.00E+00 | 2.53E-02 |
| Ano1_chr7           | 2   | 3   | 6   | 2   | 0.1  | 1.1 | -1.4 | 2.6 | 6.76E-01 | 5.00E-05 | 1.00E+00 | 2.85E-04 |
| Atp1b1_chr1         | 10  | 11  | 16  | 6   | 0.1  | 1.0 | -1.5 | 2.9 | 7.94E-01 | 5.00E-05 | 1.00E+00 | 2.85E-04 |
| B3gnt8_chr7         | 5   | 6   | 8   | 3   | 0.5  | 1.4 | -1.5 | 2.7 | 2.76E-01 | 1.10E-04 | 9.93E-01 | 6.12E-04 |
| Bach2_chr4          | 13  | 16  | 29  | 13  | 0.3  | 1.2 | -1.2 | 2.3 | 1.99E-01 | 5.00E-05 | 9.48E-01 | 2.85E-04 |
| BC094916_chr1       | 18  | 12  | 20  | 12  | -0.5 | 1.5 | -0.8 | 1.7 | 4.14E-02 | 5.00E-05 | 6.94E-01 | 2.85E-04 |
| Cacna1e_chr1        | 12  | 11  | 25  | 13  | -0.1 | 1.1 | -1.0 | 2.0 | 5.75E-01 | 5.00E-05 | 1.00E+00 | 2.85E-04 |
| Cacna1i_chr15       | 6   | 8   | 15  | 4   | 0.4  | 1.3 | -1.8 | 3.5 | 6.52E-02 | 5.00E-05 | 8.76E-01 | 2.85E-04 |
| Card6_chr15         | 17  | 20  | 32  | 16  | 0.2  | 1.1 | -1.0 | 2.0 | 3.75E-01 | 5.00E-05 | 1.00E+00 | 2.85E-04 |
| Ccr7_chr11          | 36  | 46  | 61  | 25  | 0.3  | 1.3 | -1.3 | 2.4 | 9.48E-02 | 5.00E-05 | 9.27E-01 | 2.85E-04 |
| Cd19_chr7           | 205 | 259 | 275 | 144 | 0.3  | 1.3 | -0.9 | 1.9 | 2.10E-01 | 5.00E-05 | 9.88E-01 | 2.85E-04 |
| Cd2_chr3            | 44  | 54  | 45  | 22  | 0.3  | 1.2 | -1.0 | 2.0 | 1.53E-01 | 5.00E-05 | 9.73E-01 | 2.85E-04 |
| Cd209a_chr8         | 11  | 14  | 12  | 6   | 0.3  | 1.3 | -1.0 | 2.0 | 1.85E-01 | 5.00E-05 | 9.86E-01 | 2.85E-04 |
| Cd40lg_chrX         | 3   | 3   | 4   | 2   | 0.0  | 1.0 | -1.2 | 2.2 | 9.15E-01 | 5.00E-05 | 1.00E+00 | 2.85E-04 |
| Cd55_chr1           | 86  | 100 | 119 | 58  | 0.2  | 1.2 | -1.0 | 2.0 | 3.17E-01 | 5.00E-05 | 9.97E-01 | 2.85E-04 |
| Cd79a_chr7          | 264 | 389 | 256 | 121 | 0.6  | 1.5 | -1.1 | 2.1 | 2.71E-02 | 5.00E-05 | 7.04E-01 | 2.85E-04 |
| Chst3_chr10         | 28  | 32  | 54  | 30  | 0.2  | 1.1 | -0.9 | 1.8 | 4.13E-01 | 5.00E-05 | 1.00E+00 | 2.85E-04 |
| Clic5_chr17         | 23  | 20  | 43  | 21  | -0.2 | 1.2 | -1.1 | 2.1 | 2.99E-01 | 5.00E-05 | 9.84E-01 | 2.85E-04 |
| Col14a1_chr15       | 16  | 17  | 37  | 22  | 0.1  | 1.1 | -0.7 | 1.7 | 6.91E-01 | 5.00E-05 | 1.00E+00 | 2.85E-04 |
| Cpe_chr8            | 3   | 4   | 5   | 2   | 0.3  | 1.2 | -1.6 | 3.0 | 4.49E-01 | 5.00E-05 | 1.00E+00 | 2.85E-04 |
| Cpm_chr10           | 6   | 7   | 10  | 3   | 0.3  | 1.2 | -1.6 | 3.1 | 2.66E-01 | 5.00E-05 | 9.94E-01 | 2.85E-04 |
| Crisp3_chr17        | 3   | 3   | 3   | 2   | -0.2 | 1.1 | -1.1 | 2.1 | 7.13E-01 | 5.00E-05 | 1.00E+00 | 2.85E-04 |
| Cxcr5_chr9          | 42  | 78  | 80  | 51  | 0.9  | 1.8 | -0.6 | 1.6 | 3.50E-05 | 5.00E-05 | 8.24E-03 | 2.85E-04 |
| Cyp21a1_chr17       | 6   | 4   | 11  | 3   | -0.6 | 1.6 | -1.8 | 3.4 | 4.94E-02 | 5.00E-05 | 8.46E-01 | 2.85E-04 |

|                 |     |       |     |     |      |     |      |     |          |          |          |          |
|-----------------|-----|-------|-----|-----|------|-----|------|-----|----------|----------|----------|----------|
| Ebf1_chr11      | 29  | 32    | 60  | 20  | 0.2  | 1.1 | -1.6 | 3.0 | 4.16E-01 | 5.00E-05 | 1.00E+00 | 2.85E-04 |
| Efr3b_chr12     | 1   | 1     | 2   | 1   | 0.0  | 1.0 | -0.9 | 1.9 | 3.65E-01 | 5.00E-05 | 9.99E-01 | 2.85E-04 |
| Egr1_chr18      | 6   | 8     | 13  | 7   | 0.4  | 1.3 | -0.8 | 1.8 | 1.05E-01 | 5.00E-05 | 9.38E-01 | 2.85E-04 |
| Faim3_chr1      | 94  | 150   | 154 | 75  | 0.7  | 1.6 | -1.0 | 2.0 | 1.60E-03 | 5.00E-05 | 1.73E-01 | 2.85E-04 |
| Fam129c_chr8    | 36  | 30    | 59  | 17  | -0.3 | 1.2 | -1.8 | 3.5 | 1.86E-01 | 5.00E-05 | 9.86E-01 | 2.85E-04 |
| Fchsd2_chr7     | 32  | 45    | 55  | 28  | 0.5  | 1.4 | -1.0 | 2.0 | 2.21E-02 | 5.00E-05 | 5.43E-01 | 2.85E-04 |
| Ffar1_chr7      | 8   | 9     | 17  | 7   | 0.1  | 1.1 | -1.2 | 2.2 | 7.45E-01 | 5.00E-05 | 1.00E+00 | 2.85E-04 |
| Fndc7_chr3      | 1   | 1     | 2   | 1   | -0.4 | 1.3 | -1.3 | 2.5 | 9.92E-02 | 5.00E-05 | 9.21E-01 | 2.85E-04 |
| Foxo1_chr3      | 23  | 30    | 43  | 22  | 0.4  | 1.3 | -0.9 | 1.9 | 9.34E-02 | 5.00E-05 | 9.27E-01 | 2.85E-04 |
| Gdf11_chr10     | 11  | 13    | 22  | 12  | 0.3  | 1.3 | -0.8 | 1.8 | 1.78E-01 | 5.00E-05 | 9.84E-01 | 2.85E-04 |
| Gdf6_chr4       | 5   | 10    | 9   | 5   | 1.0  | 2.0 | -0.7 | 1.7 | 1.01E-04 | 5.00E-05 | 1.41E-02 | 2.85E-04 |
| Gga2_chr7       | 24  | 35    | 47  | 26  | 0.5  | 1.4 | -0.9 | 1.8 | 1.86E-02 | 5.00E-05 | 6.08E-01 | 2.85E-04 |
| H2-Ob_chr17     | 158 | 184   | 205 | 128 | 0.2  | 1.2 | -0.7 | 1.6 | 3.86E-01 | 1.50E-04 | 1.00E+00 | 7.89E-04 |
| Havcr1_chr11    | 2   | 2     | 3   | 0   | 0.2  | 1.1 | -1.4 | 2.6 | 6.93E-01 | 4.46E-03 | 1.00E+00 | 1.56E-02 |
| Hba-a1_chr11    | 543 | 1,058 | 210 | 53  | 1.0  | 1.9 | -2.0 | 4.1 | 3.76E-04 | 6.65E-03 | 6.21E-02 | 2.18E-02 |
| Hepacam2_chr6   | 5   | 4     | 5   | 3   | -0.1 | 1.0 | -0.8 | 1.8 | 8.40E-01 | 5.00E-05 | 1.00E+00 | 2.85E-04 |
| Hivep2_chr10    | 12  | 13    | 28  | 16  | 0.1  | 1.1 | -0.9 | 1.8 | 5.20E-01 | 5.00E-05 | 1.00E+00 | 2.85E-04 |
| Hivep3_chr4     | 2   | 2     | 6   | 3   | -0.1 | 1.1 | -0.7 | 1.7 | 7.57E-01 | 5.00E-05 | 1.00E+00 | 2.85E-04 |
| Hs3st3a1_chr11  | 2   | 2     | 3   | 2   | 0.2  | 1.1 | -0.8 | 1.7 | 5.90E-01 | 5.00E-05 | 1.00E+00 | 2.85E-04 |
| Ikzf3_chr11     | 71  | 76    | 153 | 79  | 0.1  | 1.1 | -1.0 | 1.9 | 6.59E-01 | 5.00E-05 | 1.00E+00 | 2.85E-04 |
| Il5ra_chr6      | 4   | 4     | 6   | 2   | -0.2 | 1.2 | -1.4 | 2.7 | 4.07E-01 | 5.00E-05 | 1.00E+00 | 2.85E-04 |
| Itga8_chr2      | 5   | 4     | 9   | 3   | -0.2 | 1.2 | -1.4 | 2.7 | 3.46E-01 | 5.00E-05 | 9.93E-01 | 2.85E-04 |
| Itk_chr11       | 16  | 14    | 31  | 14  | -0.2 | 1.2 | -1.2 | 2.2 | 2.53E-01 | 5.00E-05 | 9.70E-01 | 2.85E-04 |
| Itpr3_chr17     | 28  | 29    | 69  | 35  | 0.0  | 1.0 | -1.0 | 1.9 | 8.93E-01 | 5.00E-05 | 1.00E+00 | 2.85E-04 |
| Jag1_chr2       | 5   | 6     | 10  | 6   | 0.3  | 1.3 | -0.7 | 1.6 | 1.71E-01 | 5.00E-05 | 9.81E-01 | 2.85E-04 |
| Jakmip1_chr5    | 12  | 14    | 25  | 12  | 0.2  | 1.1 | -1.0 | 2.0 | 4.59E-01 | 5.00E-05 | 1.00E+00 | 2.85E-04 |
| Kcnd3_chr3      | 1   | 2     | 3   | 1   | 0.3  | 1.2 | -1.0 | 1.9 | 5.57E-01 | 5.00E-05 | 1.00E+00 | 2.85E-04 |
| Kcnq5_chr1      | 1   | 2     | 3   | 2   | 0.2  | 1.1 | -0.8 | 1.8 | 6.02E-01 | 5.00E-05 | 1.00E+00 | 2.85E-04 |
| Klhl14_chr18    | 5   | 7     | 10  | 5   | 0.5  | 1.4 | -1.1 | 2.2 | 6.60E-02 | 5.00E-05 | 8.76E-01 | 2.85E-04 |
| Kmo_chr1        | 29  | 38    | 45  | 29  | 0.4  | 1.3 | -0.6 | 1.6 | 6.04E-02 | 5.00E-05 | 8.74E-01 | 2.85E-04 |
| Kmt2a_chr9      | 26  | 24    | 57  | 36  | -0.1 | 1.1 | -0.7 | 1.6 | 6.77E-01 | 3.00E-04 | 1.00E+00 | 1.47E-03 |
| L1cam_chrX      | 3   | 3     | 6   | 3   | 0.2  | 1.2 | -0.9 | 1.9 | 4.16E-01 | 5.00E-05 | 1.00E+00 | 2.85E-04 |
| Lef1_chr3       | 11  | 12    | 27  | 9   | 0.1  | 1.1 | -1.5 | 2.9 | 5.88E-01 | 5.00E-05 | 1.00E+00 | 2.85E-04 |
| Lgals4_chr7     | 4   | 4     | 5   | 3   | 0.0  | 1.0 | -1.0 | 2.0 | 9.51E-01 | 5.00E-05 | 1.00E+00 | 2.85E-04 |
| Ltbp2_chr12     | 3   | 6     | 10  | 4   | 0.8  | 1.8 | -1.1 | 2.2 | 8.20E-04 | 5.00E-05 | 1.11E-01 | 2.85E-04 |
| Ly6d_chr15      | 176 | 226   | 141 | 69  | 0.4  | 1.3 | -1.0 | 2.1 | 9.20E-02 | 5.00E-05 | 9.27E-01 | 2.85E-04 |
| Lynx1_chr15     | 14  | 12    | 26  | 7   | -0.2 | 1.1 | -1.8 | 3.5 | 4.76E-01 | 5.00E-05 | 1.00E+00 | 2.85E-04 |
| Mapk11_chr15    | 13  | 21    | 21  | 11  | 0.7  | 1.6 | -0.9 | 1.9 | 1.88E-03 | 5.00E-05 | 1.88E-01 | 2.85E-04 |
| Marveld2_chr13  | 3   | 2     | 5   | 2   | -0.4 | 1.3 | -1.4 | 2.7 | 2.46E-01 | 5.00E-05 | 9.98E-01 | 2.85E-04 |
| Mcoln3_chr3     | 4   | 4     | 6   | 4   | 0.1  | 1.1 | -0.8 | 1.7 | 7.54E-01 | 5.00E-05 | 1.00E+00 | 2.85E-04 |
| Mef2c_chr13     | 29  | 36    | 51  | 26  | 0.3  | 1.3 | -1.0 | 1.9 | 3.11E-01 | 3.38E-03 | 9.93E-01 | 1.14E-02 |
| Mex3b_chr7      | 2   | 2     | 4   | 2   | 0.0  | 1.0 | -0.7 | 1.6 | 9.65E-01 | 5.00E-05 | 1.00E+00 | 2.85E-04 |
| Mfap4_chr11     | 3   | 3     | 4   | 2   | 0.1  | 1.1 | -1.2 | 2.2 | 7.95E-01 | 5.00E-05 | 1.00E+00 | 2.85E-04 |
| Mmp12_chr9      | 2   | 4     | 3   | 1   | 0.7  | 1.6 | -1.1 | 2.1 | 2.06E-02 | 5.00E-05 | 6.41E-01 | 2.85E-04 |
| Ms4a1_chr19     | 346 | 336   | 447 | 218 | 0.0  | 1.0 | -1.0 | 2.1 | 8.82E-01 | 5.00E-05 | 1.00E+00 | 2.85E-04 |
| Nrep_chr18      | 3   | 2     | 4   | 2   | -0.4 | 1.3 | -0.9 | 1.9 | 3.67E-01 | 5.00E-05 | 9.90E-01 | 2.70E-04 |
| Ntn1_chr11      | 1   | 1     | 3   | 1   | -0.3 | 1.2 | -1.3 | 2.5 | 4.63E-01 | 5.00E-05 | 1.00E+00 | 2.85E-04 |
| Ogn_chr13       | 4   | 2     | 5   | 3   | -0.9 | 1.8 | -0.9 | 1.8 | 3.32E-02 | 2.23E-02 | 7.65E-01 | 6.14E-02 |
| Olfml2a_chr2    | 1   | 3     | 5   | 3   | 0.8  | 1.8 | -0.6 | 1.5 | 3.39E-02 | 4.00E-04 | 7.66E-01 | 1.91E-03 |
| Olfrl64_chr16   | 3   | 3     | 4   | 2   | -0.3 | 1.2 | -1.4 | 2.6 | 5.23E-01 | 5.00E-05 | 1.00E+00 | 2.85E-04 |
| Pax5_chr4       | 67  | 89    | 159 | 75  | 0.4  | 1.3 | -1.1 | 2.1 | 4.68E-02 | 5.00E-05 | 7.18E-01 | 2.85E-04 |
| Pgap1_chr1      | 10  | 12    | 18  | 11  | 0.2  | 1.2 | -0.7 | 1.6 | 2.93E-01 | 5.00E-05 | 9.83E-01 | 2.85E-04 |
| Pik3c2b_chr1    | 14  | 16    | 33  | 18  | 0.1  | 1.1 | -0.9 | 1.8 | 5.03E-01 | 5.00E-05 | 1.00E+00 | 2.85E-04 |
| Plekhg2_chr7    | 13  | 13    | 28  | 15  | 0.1  | 1.0 | -1.0 | 1.9 | 5.58E-01 | 4.50E-04 | 1.00E+00 | 2.06E-03 |
| Plxna3_chrX     | 2   | 2     | 3   | 2   | 0.0  | 1.0 | -0.6 | 1.6 | 9.05E-01 | 1.50E-04 | 1.00E+00 | 7.89E-04 |
| Prkcb_chr7      | 54  | 60    | 104 | 61  | 0.2  | 1.1 | -0.8 | 1.7 | 5.56E-01 | 5.00E-05 | 1.00E+00 | 2.85E-04 |
| Prkcg_chr7      | 1   | 2     | 2   | 2   | 0.6  | 1.5 | -0.7 | 1.6 | 1.30E-01 | 5.50E-04 | 9.55E-01 | 2.52E-03 |
| Pxdc1_chr13     | 18  | 28    | 25  | 13  | 0.6  | 1.6 | -1.0 | 2.0 | 4.43E-03 | 5.00E-05 | 3.28E-01 | 2.85E-04 |
| Rasgrp1_chr2    | 26  | 29    | 51  | 23  | 0.1  | 1.1 | -1.1 | 2.2 | 4.81E-01 | 5.00E-05 | 1.00E+00 | 2.85E-04 |
| Rel_chr11       | 21  | 23    | 44  | 26  | 0.1  | 1.1 | -0.7 | 1.7 | 5.47E-01 | 5.00E-05 | 1.00E+00 | 2.85E-04 |
| Rftn2_chr1      | 3   | 3     | 4   | 2   | 0.2  | 1.1 | -1.2 | 2.4 | 5.65E-01 | 5.00E-05 | 1.00E+00 | 2.85E-04 |
| Rhof_chr5       | 16  | 25    | 27  | 15  | 0.6  | 1.6 | -0.9 | 1.8 | 3.96E-03 | 5.00E-05 | 3.11E-01 | 2.85E-04 |
| Sbk1_chr7       | 25  | 29    | 55  | 25  | 0.2  | 1.2 | -1.1 | 2.2 | 3.11E-01 | 5.00E-05 | 9.97E-01 | 2.85E-04 |
| Scn4a_chr11     | 4   | 5     | 9   | 4   | 0.2  | 1.1 | -1.0 | 2.0 | 4.11E-01 | 5.00E-05 | 1.00E+00 | 2.85E-04 |
| Sesn3_chr9      | 19  | 22    | 50  | 27  | 0.2  | 1.1 | -0.9 | 1.9 | 4.33E-01 | 5.00E-05 | 1.00E+00 | 2.85E-04 |
| Sfn_chr4        | 4   | 5     | 7   | 4   | 0.4  | 1.3 | -0.9 | 1.9 | 3.27E-01 | 5.00E-05 | 9.98E-01 | 2.85E-04 |
| Siglecg_chr7    | 91  | 107   | 112 | 70  | 0.2  | 1.2 | -0.7 | 1.6 | 2.95E-01 | 5.00E-05 | 9.96E-01 | 2.85E-04 |
| Siglech_chr7    | 19  | 16    | 25  | 5   | -0.3 | 1.2 | -2.2 | 4.6 | 2.59E-01 | 5.00E-05 | 9.72E-01 | 2.85E-04 |
| Slc9a7_chrX     | 11  | 12    | 27  | 14  | 0.1  | 1.1 | -0.9 | 1.9 | 6.19E-01 | 5.00E-05 | 1.00E+00 | 2.85E-04 |
| Sox4_chr13      | 4   | 4     | 8   | 4   | 0.0  | 1.0 | -0.8 | 1.8 | 9.62E-01 | 5.00E-05 | 1.00E+00 | 2.85E-04 |
| Spib_chr7       | 107 | 136   | 178 | 75  | 0.3  | 1.3 | -1.2 | 2.4 | 1.37E-01 | 5.00E-05 | 9.60E-01 | 2.85E-04 |
| Srpk3_chrX      | 23  | 28    | 30  | 16  | 0.3  | 1.2 | -0.9 | 1.9 | 2.41E-01 | 5.00E-05 | 9.92E-01 | 2.85E-04 |
| Srpx_chrX       | 3   | 3     | 4   | 2   | 0.0  | 1.0 | -1.3 | 2.5 | 9.80E-01 | 5.00E-05 | 1.00E+00 | 2.85E-04 |
| St8sia1_chr6    | 3   | 3     | 5   | 3   | -0.1 | 1.1 | -0.9 | 1.8 | 6.54E-01 | 5.00E-05 | 1.00E+00 | 2.85E-04 |
| Synpo2_chr3     | 6   | 9     | 15  | 10  | 0.6  | 1.5 | -0.6 | 1.5 | 4.74E-03 | 5.00E-05 | 2.52E-01 | 2.85E-04 |
| Tdrp_chr8       | 4   | 4     | 7   | 2   | -0.1 | 1.1 | -1.7 | 3.2 | 7.16E-01 | 5.00E-05 | 1.00E+00 | 2.85E-04 |
| Tmie_chr9       | 2   | 1     | 3   | 1   | -0.5 | 1.4 | -1.3 | 2.5 | 2.73E-01 | 5.00E-05 | 9.94E-01 | 2.85E-04 |
| Tnfrsf13c_chr15 | 49  | 67    | 78  | 31  | 0.4  | 1.4 | -1.3 | 2.5 | 3.16E-02 | 5.00E-05 | 7.56E-01 | 2.85E-04 |
| Trat1_chr16     | 5   | 5     | 7   | 4   | -0.1 | 1.0 | -0.7 | 1.7 | 8.99E-01 | 3.50E-04 | 1.00E+00 | 1.69E-03 |
| Vipr1_chr9      | 5   | 4     | 9   | 3   | -0.3 | 1.2 | -1.5 | 2.7 | 2.44E-01 | 5.00E-05 | 9.68E-01 | 2.85E-04 |
| Vpreb3_chr10    | 13  | 16    | 12  | 3   | 0.2  | 1.2 | -2.1 | 4.3 | 5.23E-01 | 5.00E-05 | 1.00E+00 | 2.85E-04 |
| Xkrx_chrX       | 7   | 9     | 11  | 5   | 0.5  | 1.5 | -1.1 | 2.1 | 2.90E-02 | 5.00E-05 | 7.30E-01 | 2.85E-04 |
| Xlr3b_chrX      | 6   | 2     | 6   | 3   | -1.6 | 3.0 | -1.1 | 2.1 | 8.40E-05 | 5.00E-05 | 1.77E-02 | 2.85E-04 |

|              |   |    |    |    |     |     |      |     |          |          |          |          |
|--------------|---|----|----|----|-----|-----|------|-----|----------|----------|----------|----------|
| Zfp608_chr18 | 7 | 9  | 14 | 7  | 0.3 | 1.3 | -0.9 | 1.9 | 1.24E-01 | 5.00E-05 | 9.50E-01 | 2.85E-04 |
| Zfp831_chr2  | 9 | 10 | 20 | 11 | 0.2 | 1.2 | -0.9 | 1.8 | 2.53E-01 | 5.00E-05 | 9.92E-01 | 2.85E-04 |

**Supplemental Table 3. Presence of potential TTP binding sites in the transcripts that were up-regulated in the triple KO (TKO) vs WT comparison, compared to the double KO (DKO) vs WT comparison. Conservation was determined by evaluation of aligned mammalian 3'UTRs in the UCSC genome browser, with the ideal binding site 7 mer being UAUUUAU, and the ideal 9-mer UUAUUUAUU.**

|    | Gene Symbol    | Gene Name                                       | Fold change<br>DKO/WT | Fold Change<br>TKO/WT | Significant<br>DKO vs WT | Significant<br>TKO vs WT | Conservation | TTP Binding Sites                                         |
|----|----------------|-------------------------------------------------|-----------------------|-----------------------|--------------------------|--------------------------|--------------|-----------------------------------------------------------|
| 1  | <i>Apol11B</i> | Apolipoprotein L 11b                            | 3.5                   | 367.4                 | yes                      | yes                      | Mouse only   | One 8 mer poorly conserved                                |
| 2  | <i>Ltf</i>     | Lactotransferrin                                | 4.6                   | 81.7                  | yes                      | yes                      | Mouse only   | One 9 mer poorly conserved                                |
| 3  | <i>Gypa</i>    | Glycophorin A                                   | 1.9                   | 55.0                  | no                       | yes                      | Mouse only   | One 8 mer poorly conserved                                |
| 4  | <i>Slfn4</i>   | Schlafen 4                                      | 1.4                   | 31.5                  | no                       | yes                      | Mouse, Rat   | One 7 mer poorly conserved                                |
| 5  | <i>Tmcc2</i>   | Transmem and coiled coil domain family 2        | 1.5                   | 23.2                  | no                       | yes                      | Conserved    | One 8 mer-9mer overlap poorly, one 9 mer highly conserved |
| 6  | <i>Tfrc</i>    | Transferrin receptor (p90, CD71)                | 1.1                   | 18.5                  | no                       | yes                      | Conserved    | Two 8 mers highly conserved                               |
| 7  | <i>Abcg4</i>   | ATP-binding cassette, subfamily G, member 4     | 1.0                   | 17.0                  | no                       | yes                      | Conserved    | One 7 mer highly conserved                                |
| 8  | <i>Oas3</i>    | 2'-5' oligoadenylate synthetase 3               | 1.6                   | 15.5                  | no                       | yes                      | Mouse only   | One 7 mer poorly conserved                                |
| 9  | <i>E2F8</i>    | E2F transcription factor 8                      | 1.4                   | 13.0                  | no                       | yes                      | Conserved    | One 8 mer highly conserved                                |
| 10 | <i>Birc5</i>   | Baculoviral IAP repeat containing 5             | 1.4                   | 13.0                  | no                       | yes                      | Mouse only   | Three 9 mers overlapping poorly conserved                 |
| 11 | <i>Cenpf</i>   | Centromere protein F, 350/400kDa                | 1.0                   | 12.0                  | no                       | yes                      | Mouse only   | One 7 mer poorly conserved                                |
| 12 | <i>Sox6</i>    | SRY (sex determining region Y)-box 6            | 1.0                   | 11.9                  | no                       | yes                      | Conserved    | Five 8 mers, one 7 mer highly conserved                   |
| 13 | <i>Sgol1</i>   | shugoshin-like 1 (S.pombe)                      | 1.0                   | 11.8                  | no                       | yes                      | Mouse only   | Two 8 mers poorly conserved                               |
| 14 | <i>Kif18B</i>  | Kinesin family member 18 b                      | 1.1                   | 11.7                  | no                       | yes                      | Mouse only   | One 7 mer poorly conserved                                |
| 15 | <i>Cdc6</i>    | Cell division cycle 6                           | 1.4                   | 11.7                  | no                       | yes                      | Conserved    | One 8 mer highly conserved                                |
| 16 | <i>Lmo2</i>    | rhombotin-2                                     | -1.1                  | 11.4                  | no                       | yes                      | Conserved    | One 7 mer moderately conserved                            |
| 17 | <i>Gpr146</i>  | probable G-protein coupled receptor 146 isoform | 1.0                   | 11.4                  | no                       | yes                      | Conserved    | One 7 mer highly conserved                                |



Supplemental Table 3 (continued)

|    |                      |                                                  |      |      |    |     |            |                                                       |
|----|----------------------|--------------------------------------------------|------|------|----|-----|------------|-------------------------------------------------------|
| 18 | <i>Ccna2</i>         | Cycline A2                                       | 1.2  | 11.3 | no | yes | Mouse only | One 8 mer poorly conserved                            |
| 19 | <i>Tmem56</i>        | transmembrane protein 56                         | 1.0  | 11.1 | no | yes | Conserved  | One 7 mer highly, one 9 mer moderately conserved      |
| 20 | <i>Depdc1A</i>       | DEP domain-containing protein 1A isoform 1       | -1.1 | 10.5 | no | yes | Mouse, Rat | One 8 mer poorly conserved                            |
| 21 | <i>Clcn3</i>         | H(+)/Cl(-) exchange transporter 3                | 1.1  | 9.7  | no | yes | Conserved  | One 8 mer, one 7 mer , one 8 mer all highly conserved |
| 22 | <i>Anln</i>          | actin-binding protein anillin                    | -1.0 | 9.6  | no | yes | Conserved  | One 7 mer highly, two 7 mers poorly conserved         |
| 23 | <i>Kntc1</i>         | kinetochore-associated protein 1                 | 1.0  | 9.6  | no | yes | Conserved  | One 8 mer highly conserved                            |
| 24 | <i>Irf44</i>         | interferon-induced protein 44                    | 1.3  | 9.6  | no | yes | Mouse, Rat | One 7 mer poorly conserved                            |
| 25 | <i>Ccne2</i>         | G1/S-specific cyclin-E2 isoform 2                | 1.0  | 9.4  | no | yes | Conserved  | One 8 mer highly conserved                            |
| 26 | <i>Ccnb1</i>         | G2/mitotic-specific cyclin-B1                    | 1.1  | 9.4  | no | yes | Mouse, Rat | One 9 mer poorly conserved                            |
| 27 | <i>Slc25A21</i>      | mitochondrial 2-oxodicarboxylate carrier isoform | 1.0  | 9.2  | no | yes | Conserved  | One 7 mer poorly conserved                            |
| 28 | <i>Ncapg</i>         | non-SMC condensin I complex, subunit G           | 1.0  | 9.2  | no | yes | Conserved  | Two 8 mers poorly conserved                           |
| 29 | <i>Prc1</i>          | Protein regulator of cytokinesis 1;              | 1.2  | 9.1  | no | yes | Conserved  | One 8 mer moderately conserved                        |
| 30 | <i>Clspn</i>         | claspin                                          | 1.1  | 8.8  | no | yes | Conserved  | One 8 mer highly conserved                            |
| 31 | <i>Ache</i>          | acetylcholinesterase precursor                   | 1.3  | 8.6  | no | yes | Conserved  | One 8 mer moderately conserved                        |
| 32 | <i>Chac2</i>         | Cation transport regulator-like protein 2        | 1.1  | 8.4  | no | yes | Mouse only | One 8 mer poorly conserved                            |
| 33 | <i>Fam109B</i>       | hypothetical protein LOC338368                   | -1.3 | 8.4  | no | yes | Mouse only | One 8 mer poorly conserved                            |
| 34 | <i>Kif18A</i>        | kinesin-like protein KIF18A                      | -1.3 | 8.3  | no | yes | Mouse only | One 7 mer poorly conserved                            |
| 35 | <i>C530008M17Rik</i> | hypothetical protein LOC320827                   | 1.0  | 8.2  | no | yes | Conserved  | Two 9 mers moderately conserved                       |
| 36 | <i>Nt5C3</i>         | cytosolic 5'-nucleotidase 3                      | 1.1  | 8.2  | no | yes | Conserved  | One 8 mer moderately conserved                        |
| 37 | <i>Nuf2</i>          | kinetochore protein Nuf2                         | 1.2  | 8.1  | no | yes | Mouse only | One 8 mer poorly conserved                            |
| 38 | <i>Pif1</i>          | ATP-dependent DNA helicase PIF1                  | 1.0  | 7.9  | no | yes | Conserved  | One 8 mer highly, one 8 mer poorly conserved          |

Supplemental Table 3 (continued)

|    |                 |                                                              |      |     |     |     |            |                                                  |
|----|-----------------|--------------------------------------------------------------|------|-----|-----|-----|------------|--------------------------------------------------|
| 39 | <i>Odf2</i>     | outer dense fiber protein 2                                  | 1.5  | 7.9 | no  | yes | Mouse, Rat | One 9 mer poorly conserved                       |
| 40 | <i>Cenpe</i>    | centromere-associated protein E                              | -1.0 | 7.9 | no  | yes | Mouse only | One 9 mer poorly conserved                       |
| 41 | <i>Gda</i>      | Guanine Deaminase                                            | 1.2  | 7.8 | no  | yes | Conserved  | One 7 mer moderately conserved                   |
| 42 | <i>Kif14</i>    | Kinesin family member 14                                     | 1.0  | 7.8 | no  | yes | Conserved  | One 7 mer moderately, one 9 mer poorly conserved |
| 43 | <i>Cenpi</i>    | Centromere protein 1                                         | 1.0  | 7.4 | no  | yes | Conserved  | One 7 mer moderately conserved                   |
| 44 | <i>C5Ar1</i>    | C5a anaphylatoxin chemotactic receptor                       | 1.0  | 7.4 | no  | yes | Mouse only | One 8 mer, one 9 mer poorly conserved            |
| 45 | <i>Bub1</i>     | Budding uninhibited by benzimidazoles 1 homologue (S.        | -1.1 | 7.0 | no  | yes | Conserved  | One 7 mer moderately conserved                   |
| 46 | <i>Lilra5</i>   | Leucocyte immunoglobulin-like receptor, subfamily A (with TM | 3.5  | 7.0 | yes | yes | Conserved  | One 7 mer moderately, one 7 mer poorly conserved |
| 47 | <i>Kifc1</i>    | kinesin family member C5B                                    | 1.4  | 7.0 | no  | yes | Conserved  | One 7 mer moderately, one 8 mer poorly conserved |
| 48 | <i>Slc14A1</i>  | urea transporter 1                                           | -1.0 | 6.9 | no  | yes | Conserved  | One 9 mer moderately conserved                   |
| 49 | <i>Nek2</i>     | Nek2 kinase                                                  | 1.3  | 6.7 | no  | yes | Conserved  | One 8 mer moderately conserved                   |
| 50 | <i>Mmp9</i>     | matrix metalloproteinase-9 precursor                         | 1.4  | 6.7 | no  | yes | Mouse only | One 9 mer poorly conserved                       |
| 51 | <i>Kif2C</i>    | kinesin-like protein KIF2C                                   | 1.2  | 6.6 | no  | yes | Conserved  | One 7 mer moderately conserved                   |
| 52 | <i>Ppp1R15A</i> | protein phosphatase 1 regulatory subunit 15A                 | 1.2  | 6.3 | no  | yes | Mouse only | Four overlapping 9 mers poorly conserved         |
| 53 | <i>Hmgb2</i>    | high mobility group protein B2                               | 1.1  | 6.3 | no  | yes | Mouse, Rat | Two 7 mers, one 9 mer poorly conserved           |
| 54 | <i>Pip5K1B</i>  | phosphatidylinositol-4-phosphate 5-kinase type-1             | 1.3  | 6.2 | no  | yes | Conserved  | One 7 mer highly conserved                       |
| 55 | <i>Mfsd2B</i>   | Major facilitator superfamily domain-containing protein 2B   | 1.3  | 6.1 | no  | yes | Mouse, Rat | One 7 mer poorly conserved                       |
| 56 | <i>Usp18</i>    | ubl carboxyl-terminal hydrolase 18                           | 1.6  | 5.9 | no  | yes | Conserved  | One 7 mer highly conserved                       |
| 57 | <i>Tfdp2</i>    | transcription factor Dp-2                                    | 1.0  | 5.9 | no  | yes | Mouse, Rat | One 8 mer poorly conserved                       |
| 58 | <i>March8</i>   | E3 ubiquitin-protein ligase MARCH8                           | -1.0 | 5.9 | no  | yes | Conserved  | One 7 mer moderately conserved                   |
| 59 | <i>Slc25A37</i> | mitoferrin-1                                                 | 1.3  | 5.8 | no  | yes | Conserved  | One 8 mer highly conserved                       |

Supplemental Table 3 (continued)

|    |                      |                                                                     |      |     |     |     |            |                                                                                 |
|----|----------------------|---------------------------------------------------------------------|------|-----|-----|-----|------------|---------------------------------------------------------------------------------|
| 60 | <i>C330027C09Rik</i> | protein CIP2A                                                       | -1.1 | 5.8 | no  | yes | Conserved  | One 7 mer highly, one 8 mer moderately conserved                                |
| 61 | <i>Tjap1</i>         | tight junction-associated protein 1                                 | 3.2  | 5.7 | no  | yes | Conserved  | One 8 mer moderately conserved                                                  |
| 62 | <i>Xpo7</i>          | mRNA for Ran binding protein 16.                                    | 1.2  | 5.6 | no  | yes | Conserved  | One 7 mer highly, one 8 mer moderately conserved                                |
| 63 | <i>Mpp2</i>          | MAGUK p55 subfamily member 2                                        | 1.0  | 5.6 | no  | yes | Conserved  | Two 8 mers highly, one 7 mer poorly conserved                                   |
| 64 | <i>Slc16A10</i>      | monocarboxylate transporter 10                                      | 1.1  | 5.6 | no  | yes | Conserved  | One 7 mer poorly, one 7 mer moderately, two overlapping 9 mers poorly conserved |
| 65 | <i>4930430F08Rik</i> | hypothetical protein LOC68281                                       | 1.0  | 5.4 | no  | yes | Conserved  | Three 7 mers moderately conserved                                               |
| 66 | <i>Ncapg2</i>        | condensin-2 complex subunit G2                                      | -1.2 | 5.4 | no  | yes | Mouse, Rat | One 9 mer poorly conserved                                                      |
| 67 | <i>Slc2A4</i>        | Solute carrier family 2 (Facilitated glucose transporter), member 4 | 1.0  | 5.3 | no  | yes | Conserved  | One 8 mer highly conserved                                                      |
| 68 | <i>Ube2T</i>         | ubiquitin-conjugating enzyme E2 T                                   | 1.1  | 5.3 | no  | yes | Conserved  | One 8 mer highly conserved                                                      |
| 69 | <i>Iqgap3</i>        | IQ motif containing GTPase activating protein 3                     | 1.0  | 5.3 | no  | yes | Conserved  | One 8 mer highly conserved                                                      |
| 70 | <i>Pask</i>          | PAS domain-containing serine/threonine-protein                      | 1.0  | 5.3 | no  | yes | Conserved  | One 8 mer, one 9 mer both moderately conserved                                  |
| 71 | <i>Ifit1</i>         | interferon-induced protein with                                     | 1.3  | 5.3 | no  | yes | Mouse, Rat | One 7 mer poorly conserved                                                      |
| 72 | <i>Sgol2</i>         | shugoshin-like 2 isoform 1                                          | -1.0 | 5.3 | no  | yes | Mouse, Rat | Two 8 mers, one 9 mer both poorly conserved                                     |
| 73 | <i>Cep76</i>         | centrosomal protein of 76 kDa                                       | 1.1  | 5.3 | no  | yes | Conserved  | One 9 mer highly conserved                                                      |
| 74 | <i>Troap</i>         | Trophinin-assisting protein                                         | 1.0  | 5.2 | no  | yes | Conserved  | One 9 mer highly conserved                                                      |
| 75 | <i>Cep290</i>        | centrosomal protein of 290 kDa                                      | 1.1  | 5.1 | no  | yes | Conserved  | One 8 mer moderately conserved                                                  |
| 76 | <i>Ssx2lp</i>        | afadin- and alpha-actinin-binding protein                           | 1.1  | 5.0 | no  | yes | Conserved  | One 8 mer highly conserved                                                      |
| 77 | <i>E2F2</i>          | transcription factor E2F2                                           | 1.4  | 5.0 | no  | yes | Conserved  | One 8 mer highly conserved                                                      |
| 78 | <i>Emilin2</i>       | EMILIN-2 precursor                                                  | -1.0 | 5.0 | no  | yes | Conserved  | One 7 mer moderately conserved                                                  |
| 79 | <i>Whrn</i>          | whirlin                                                             | 4.5  | 4.9 | yes | yes | Conserved  | One 8 mer, one 7 mer both highly conserved                                      |
| 80 | <i>Sgk3</i>          | serine/threonine-protein kinase Sgk3                                | 1.2  | 4.9 | no  | yes | Conserved  | Two 7 mers highly conserved                                                     |

Supplemental Table 3 (continued)

|     |                      |                                                 |      |     |    |     |            |                                                  |
|-----|----------------------|-------------------------------------------------|------|-----|----|-----|------------|--------------------------------------------------|
| 81  | <i>E2F7</i>          | transcription factor E2F7                       | 1.0  | 4.8 | no | yes | Conserved  | One 9 mer moderately conserved                   |
| 82  | <i>2810417H13Rik</i> | PCNA-associated factor                          | 1.3  | 4.8 | no | yes | Mouse, Rat | One 7 mer poorly conserved                       |
| 83  | <i>Bard1</i>         | BRCA1-associated RING domain protein 1          | 1.1  | 4.7 | no | yes | Conserved  | One 8 mer moderately conserved                   |
| 84  | <i>Mastl</i>         | microtubule-associated serine/threonine-protein | 1.0  | 4.7 | no | yes | Conserved  | One 8 mer highly, one 8 mer poorly conserved     |
| 85  | <i>St3Gal5</i>       | lactosylceramide alpha-2,3-sialyltransferase    | 1.4  | 4.7 | no | yes | Conserved  | One 8 mer highly conserved                       |
| 86  | <i>Bcl2L1</i>        | bcl-2-like protein 1                            | 1.6  | 4.7 | no | yes | Conserved  | One 7 mer highly conserved                       |
| 87  | <i>Metap2</i>        | methionine aminopeptidase 2                     | 1.1  | 4.6 | no | yes | Conserved  | One 7 mer highly conserved                       |
| 88  | <i>Ccrn4L</i>        | nocturnin                                       | -1.0 | 4.6 | no | yes | Conserved  | One 9 mer highly, one 8 mer moderately conserved |
| 89  | <i>Cpeb3</i>         | cytoplasmic polyadenylation element-binding     | 1.0  | 4.6 | no | yes | Conserved  | One 7 mer highly conserved                       |
| 90  | <i>Cd24A</i>         | signal transducer CD24                          | 1.2  | 4.6 | no | yes | Conserved  | One 7 mer moderately conserved                   |
| 91  | <i>Acp1</i>          | low molecular weight phosphotyrosine protein    | 1.1  | 4.5 | no | yes | Conserved  | One 8 mer moderately conserved                   |
| 92  | <i>Dusp8</i>         | dual specificity protein phosphatase 8          | 1.0  | 4.5 | no | yes | Conserved  | One 9 mer moderately conserved                   |
| 93  | <i>Il1RI1</i>        | interleukin-1 receptor-like 1 isoform a         | 1.0  | 4.5 | no | yes | Conserved  | One 8 mer poorly, one 8 mer moderately conserved |
| 94  | <i>Tmem120B</i>      | transmembrane protein 120B                      | 1.0  | 4.4 | no | yes | Conserved  | One 7 mer moderately conserved                   |
| 95  | <i>Svip</i>          | small VCP/p97-interacting protein               | -1.1 | 4.4 | no | yes | Conserved  | One 7 mer moderately conserved                   |
| 96  | <i>Nlrp12</i>        | NACHT, LRR and PYD domains-containing protein   | 1.0  | 4.4 | no | yes | Mouse only | One 8 mer poorly conserved                       |
| 97  | <i>Zwilch</i>        | protein zwilch homolog                          | -1.0 | 4.2 | no | yes | Conserved  | One 7 mer moderately conserved                   |
| 98  | <i>Pi4K2B</i>        | phosphatidylinositol 4-kinase type 2-beta       | -1.1 | 4.2 | no | yes | Conserved  | One 7 mer moderately conserved                   |
| 99  | <i>Brip1</i>         | Fanconi anemia group J protein homolog          | 1.0  | 4.2 | no | yes | Mouse, Rat | One 8 mer poorly conserved                       |
| 100 | <i>Ranbp10</i>       | ran-binding protein 10                          | 1.1  | 4.2 | no | yes | Conserved  | One 7 mer highly conserved                       |
| 101 | <i>Cenpl</i>         | centromere protein L isoform 2                  | 1.2  | 4.2 | no | yes | Mouse, Rat | One 8 mer poorly conserved                       |

Supplemental Table 3 (continued)

|     |                      |                                                 |      |     |    |     |            |                                                    |
|-----|----------------------|-------------------------------------------------|------|-----|----|-----|------------|----------------------------------------------------|
| 102 | <i>Hagh</i>          | hydroxyacylglutathione hydrolase, mitochondrial | 1.2  | 4.1 | no | yes | Conserved  | One 7 mer, one 8 mer both highly conserved         |
| 103 | <i>Mad2L1</i>        | mitotic spindle assembly checkpoint protein     | 1.0  | 4.1 | no | yes | Mouse, Rat | One 7 mer poorly conserved                         |
| 104 | <i>Ccdc34</i>        | coiled-coil domain-containing protein 34        | 1.2  | 4.0 | no | yes | Mouse, Rat | One 9 mer poorly conserved                         |
| 105 | <i>5730508B09Rik</i> | hypothetical protein LOC70617                   | -1.0 | 4.0 | no | yes | Conserved  | One 8 mer highly conserved                         |
| 106 | <i>Klra2</i>         | killer cell lectin-like receptor 2 isoform 2    | 1.1  | 4.0 | no | yes | Mouse, Rat | One 8 mer poorly conserved                         |
| 107 | <i>Dek</i>           | protein DEK                                     | -1.0 | 4.0 | no | yes | Conserved  | One 7 mer moderately conserved                     |
| 108 | <i>Mxd1</i>          | max dimerization protein 1                      | 1.1  | 4.0 | no | yes | Conserved  | One 8 mer highly, one 8 mer moderately conserved   |
| 109 | <i>Eif2Ak2</i>       | interferon-induced, double-stranded             | 1.1  | 3.9 | no | yes | Mouse only | One 8 mer poorly conserved                         |
| 110 | <i>Plk4</i>          | Serine/threonine-protein kinase PLK4            | -1.1 | 3.9 | no | yes | Conserved  | One 8 mer highly conserved                         |
| 111 | <i>Gbp10</i>         | guanylate-binding protein 10                    | 1.0  | 3.9 | no | yes | Mouse, Rat | One 9 mer poorly conserved                         |
| 112 | <i>Gadd45A</i>       | growth arrest and DNA damage-inducible protein  | 1.3  | 3.9 | no | yes | Conserved  | One 8 mer highly conserved                         |
| 113 | <i>Ppp1R3D</i>       | protein phosphatase 1 regulatory subunit 3D     | 1.0  | 3.9 | no | yes | Conserved  | One 9 mer highly conserved                         |
| 114 | <i>Gcnt2</i>         | N-acetyllactosaminide                           | 1.0  | 3.8 | no | yes | Conserved  | One 8 mer-9 mer overlap moderately conserved       |
| 115 | <i>Slc22A23</i>      | solute carrier family 22 member 23              | 1.1  | 3.7 | no | yes | Conserved  | One 8 mer highly conserved                         |
| 116 | <i>Chtf18</i>        | chromosome transmission fidelity protein 18     | 1.3  | 3.7 | no | yes | Mouse, Rat | One 7 mer poorly conserved                         |
| 117 | <i>Cks1B</i>         | cyclin-dependent kinases regulatory subunit 1   | 1.2  | 3.6 | no | yes | Conserved  | One 7 mer moderately conserved                     |
| 118 | <i>Otub2</i>         | ubiquitin thioesterase OTUB2 isoform 2          | 1.2  | 3.5 | no | yes | Conserved  | One 8 mer moderately, one 7 mer poorly conserved   |
| 119 | <i>Igj</i>           | immunoglobulin J chain precursor                | 1.2  | 3.5 | no | yes | Conserved  | One 7 mer moderately conserved                     |
| 120 | <i>E2F1</i>          | transcription factor E2F1                       | 1.2  | 3.5 | no | yes | Conserved  | Two overlapping 8 mers, one 9 mer highly conserved |
| 121 | <i>Mcm2</i>          | DNA replication licensing factor MCM2           | 1.4  | 3.5 | no | yes | Mouse only | One 8 mer poorly conserved                         |
| 122 | <i>Ccr12</i>         | C-C chemokine receptor-like 2                   | 1.7  | 3.4 | no | yes | Conserved  | One 7 mer moderately conserved                     |

Supplemental Table 3 (continued)

|     |                      |                                                  |     |     |    |     |            |                                                   |
|-----|----------------------|--------------------------------------------------|-----|-----|----|-----|------------|---------------------------------------------------|
| 123 | <i>Xk</i>            | membrane transport protein XK                    | 1.3 | 3.4 | no | yes | Conserved  | One 8 mer moderately conserved                    |
| 124 | <i>Clec4A2</i>       | C-type lectin domain family 4 member A isoform   | 1.0 | 3.4 | no | yes | Mouse only | One 7 mer poorly conserved                        |
| 125 | <i>Mtfr1</i>         | mitochondrial fission regulator 1                | 1.2 | 3.4 | no | yes | Conserved  | One 8 mer, one 7 mer both moderately conserved    |
| 126 | <i>Fam132B</i>       | hypothetical protein LOC227358 precursor         | 1.0 | 3.3 | no | yes | Conserved  | One 8 mer, one 7 mer both highly conserved        |
| 127 | <i>Asb1</i>          | ankyrin repeat and SOCS box protein 1            | 1.0 | 3.3 | no | yes | Conserved  | Two 7 mers moderately, one 9 mer poorly conserved |
| 128 | <i>Cmas</i>          | N-acetylneuraminatase cytidyltransferase         | 1.4 | 3.3 | no | yes | Conserved  | One 8 mer highly conserved                        |
| 129 | <i>Vcan</i>          | versican core protein isoform 3                  | 1.0 | 3.3 | no | yes | Conserved  | One 7 mer highly conserved                        |
| 130 | <i>Arhgap19</i>      | rho GTPase-activating protein 19                 | 1.2 | 3.3 | no | yes | Conserved  | One 9 mer highly, one 8 mer moderately conserved  |
| 131 | <i>Oaf</i>           | out at first protein homolog precursor           | 1.0 | 3.3 | no | yes | Conserved  | One 7 mer highly conserved                        |
| 132 | <i>Gch1</i>          | GTP cyclohydrolase 1 precursor                   | 1.0 | 3.2 | no | yes | Conserved  | One 8 mer highly conserved                        |
| 133 | <i>Lbp</i>           | lipopolysaccharide-binding protein precursor     | 1.0 | 3.2 | no | yes | Conserved  | One 7 mer highly conserved                        |
| 134 | <i>Il1B</i>          | interleukin-1 beta precursor                     | 1.2 | 3.2 | no | yes | Conserved  | Three 8 mers (two overlapping) highly conserved   |
| 135 | <i>Trak2</i>         | trafficking protein, kinesin binding 2           | 1.0 | 3.1 | no | yes | Conserved  | Two 7 mers moderately conserved                   |
| 136 | <i>1810033B17Rik</i> | mast cell-expressed membrane protein 1 homolog   | 1.1 | 3.1 | no | yes | Mouse, Rat | One 7 mer poorly conserved                        |
| 137 | <i>Sgms2</i>         | phosphatidylcholine:ceramide                     | 1.0 | 3.0 | no | yes | Conserved  | One 8 mer moderately conserved                    |
| 138 | <i>P2Ry1</i>         | P2Y purinoceptor 1                               | 1.2 | 3.0 | no | yes | Conserved  | Two 8 mers both highly conserved                  |
| 139 | <i>Psmc3lp</i>       | homologous-pairing protein 2 homolog             | 1.1 | 3.0 | no | yes | Conserved  | One 8 mer highly conserved                        |
| 140 | <i>Net1</i>          | neuroepithelial cell-transforming gene 1 protein | 1.1 | 3.0 | no | yes | Conserved  | One 8 mer highly conserved                        |
| 141 | <i>Mcm5</i>          | DNA replication licensing factor MCM5            | 1.4 | 3.0 | no | yes | Mouse only | One 8 mer poorly conserved                        |
| 142 | <i>Gas2L3</i>        | GAS2-like protein 3                              | 1.0 | 3.0 | no | yes | Conserved  | One 9 mer highly, one 9 mer poorly conserved      |
| 143 | <i>Scoc</i>          | short coiled-coil protein isoform                | 1.1 | 3.0 | no | yes | Conserved  | Two 7 mers both highly conserved                  |

Supplemental Table 3 (continued)

|     |                |                                                 |      |     |    |     |            |                                                              |
|-----|----------------|-------------------------------------------------|------|-----|----|-----|------------|--------------------------------------------------------------|
| 144 | <i>Arl4A</i>   | ADP-ribosylation factor-like protein 4A         | -1.0 | 2.9 | no | yes | Conserved  | Two 7 mers both moderately conserved                         |
| 145 | <i>Cd300Lf</i> | CMRF35-like molecule 1 isoform 1 precursor      | 1.2  | 2.9 | no | yes | Conserved  | One 9 mer highly conserved                                   |
| 146 | <i>Minpp1</i>  | multiple inositol polyphosphate phosphatase 1   | 1.2  | 2.9 | no | yes | Conserved  | One 7 mer highly conserved                                   |
| 147 | <i>Fut1</i>    | galactoside 2-alpha-L-fucosyltransferase 1      | 1.0  | 2.9 | no | yes | Mouse only | One 8 mer poorly conserved                                   |
| 148 | <i>Csda</i>    | DNA-binding protein A long isoform              | 1.4  | 2.8 | no | yes | Conserved  | One 9 mer highly conserved                                   |
| 149 | <i>March5</i>  | E3 ubiquitin-protein ligase MARCH5              | 1.1  | 2.8 | no | yes | Conserved  | One 8 mer highly, one 9 mer poorly conserved                 |
| 150 | <i>Fbxo48</i>  | F-box only protein 48                           | -1.1 | 2.8 | no | yes | Conserved  | One 7 mer moderately conserved                               |
| 151 | <i>Piga</i>    | N-acetylglucosaminyl-phosphatidylinositol       | 1.1  | 2.8 | no | yes | Conserved  | One 8 mer moderately conserved                               |
| 152 | <i>Usp46</i>   | ubiquitin carboxyl-terminal hydrolase 46        | 1.0  | 2.8 | no | yes | Conserved  | One 7 mer, one 8 mer both highly, one 7 mer poorly conserved |
| 153 | <i>Reep4</i>   | receptor expression-enhancing protein 4         | 2.1  | 2.7 | no | yes | Conserved  | One 8 mer highly conserved                                   |
| 154 | <i>Dck</i>     | deoxycytidine kinase                            | 1.2  | 2.7 | no | yes | Mouse only | One 7 mer poorly conserved                                   |
| 155 | <i>Usp32</i>   | ubiquitin specific protease 32                  | -1.0 | 2.7 | no | yes | Conserved  | One 9 mer highly conserved                                   |
| 156 | <i>Hace1</i>   | E3 ubiquitin-protein ligase HACE1               | -1.1 | 2.7 | no | yes | Conserved  | One 7 mer moderately conserved                               |
| 157 | <i>Sh2D1B1</i> | SH2 domain-containing protein 1B                | 1.5  | 2.6 | no | yes | Conserved  | One 8 mer poorly conserved                                   |
| 158 | <i>Gsr</i>     | glutathione reductase, mitochondrial precursor  | -1.1 | 2.6 | no | yes | Conserved  | One 7 mer moderately conserved                               |
| 159 | <i>Ifih1</i>   | interferon-induced helicase C domain-containing | 1.1  | 2.6 | no | yes | Mouse, Rat | One 8 mer poorly conserved                                   |
| 160 | <i>Casp4</i>   | caspase-4 precursor                             | 1.1  | 2.6 | no | yes | Mouse, Rat | One 8 mer poorly conserved                                   |
| 161 | <i>Vopp1</i>   | EGFR-coamplified and overexpressed protein      | 1.2  | 2.6 | no | yes | Mouse, Rat | One 8 mer, one 7 mer both poorly conserved                   |
| 162 | <i>Ccr2</i>    | C-C chemokine receptor type 2                   | 1.0  | 2.6 | no | yes | Mouse, Rat | One 7 mer poorly conserved                                   |
| 163 | <i>Gca</i>     | grancalcin                                      | 1.0  | 2.6 | no | yes | Conserved  | One 8 mer highly, one 8 mer moderately conserved             |

Supplemental Table 3 (continued)

|     |                |                                                  |      |     |    |     |            |                                            |
|-----|----------------|--------------------------------------------------|------|-----|----|-----|------------|--------------------------------------------|
| 164 | <i>Klhl12</i>  | kelch-like protein 12                            | 1.3  | 2.5 | no | yes | Conserved  | One 8 mer highly conserved                 |
| 165 | <i>Rbbp8</i>   | Retinoblastoma binding protein 8;                | -1.0 | 2.5 | no | yes | Conserved  | One 8 mer highly conserved                 |
| 166 | <i>Parvb</i>   | beta-parvin                                      | 1.4  | 2.5 | no | yes | Mouse, Rat | One 7 mer poorly conserved                 |
| 167 | <i>Suv39H2</i> | Putative uncharacterized protein                 | -1.1 | 2.5 | no | yes | Mouse only | One 7 mer poorly conserved                 |
| 168 | <i>Atad2</i>   | ATPase family AAA domain-containing protein 2    | 1.1  | 2.5 | no | yes | Conserved  | One 7 mer highly conserved                 |
| 169 | <i>Apoo</i>    | apolipoprotein O isoform 2                       | 1.2  | 2.5 | no | yes | Conserved  | One 7 mer highly conserved                 |
| 170 | <i>Tarsl2</i>  | probable threonyl-tRNA synthetase 2,             | -1.0 | 2.5 | no | yes | Mouse only | One 7 mer poorly conserved                 |
| 171 | <i>Tusc1</i>   | tumor suppressor candidate gene 1 protein        | 1.0  | 2.5 | no | yes | Conserved  | One 7 mer moderately conserved             |
| 172 | <i>Mfsd9</i>   | major facilitator superfamily domain-containing  | 1.0  | 2.4 | no | yes | Conserved  | Two 7 mers moderately conserved            |
| 173 | <i>Tnfsf14</i> | tumor necrosis factor ligand superfamily member  | 1.5  | 2.4 | no | yes | Conserved  | One 7 mer highly conserved                 |
| 174 | <i>B4Galt6</i> | beta-1,4-galactosyltransferase 6                 | 1.3  | 2.4 | no | yes | Conserved  | One 9 mer highly conserved                 |
| 175 | <i>Ncapd3</i>  | condensin-2 complex subunit D3                   | -1.1 | 2.4 | no | yes | Conserved  | One 7 mer, one 8 mer both highly conserved |
| 176 | <i>Brpf3</i>   | Putative uncharacterized protein                 | 1.1  | 2.4 | no | yes | Conserved  | One 8 mer highly conserved                 |
| 177 | <i>Sass6</i>   | Spindle assembly abnormal protein 6 homolog      | -1.0 | 2.4 | no | yes | Conserved  | One 7 mer moderately conserved             |
| 178 | <i>Cdkn2D</i>  | cyclin-dependent kinase 4 inhibitor D            | 1.2  | 2.4 | no | yes | Conserved  | One 8 mer highly conserved                 |
| 179 | <i>Mx1</i>     | interferon-induced GTP-binding protein Mx1       | 1.1  | 2.4 | no | yes | Mouse, Rat | One 7 mer poorly conserved                 |
| 180 | <i>Neu3</i>    | sialidase-3                                      | 1.1  | 2.4 | no | yes | Mouse only | One 9 mer poorly conserved                 |
| 181 | <i>Rhou</i>    | rho-related GTP-binding protein RhoU             | 1.0  | 2.4 | no | yes | Mouse only | One 7 mer poorly conserved                 |
| 182 | <i>Creg1</i>   | protein CREG1                                    | 1.1  | 2.4 | no | yes | Mouse only | One 7 mer poorly conserved                 |
| 183 | <i>Agfg2</i>   | arf-GAP domain and FG repeats-containing protein | 1.2  | 2.4 | no | yes | Conserved  | One 7 mer highly conserved                 |
| 184 | <i>Xcl1</i>    | lymphotactin precursor                           | 1.1  | 2.3 | no | yes | Conserved  | One 8 mer highly conserved                 |



Supplemental Table 3 (continued)

|     |                      |                                                                 |      |     |     |     |            |                                                      |
|-----|----------------------|-----------------------------------------------------------------|------|-----|-----|-----|------------|------------------------------------------------------|
| 185 | <i>Zfp367</i>        | zinc finger protein 367                                         | -1.1 | 2.3 | no  | yes | Conserved  | One 8 mer, one 7 mer both highly conserved           |
| 186 | <i>Evi5</i>          | ecotropic viral integration site 5 protein                      | -1.1 | 2.3 | no  | yes | Conserved  | One 7 mer highly conserved                           |
| 187 | <i>Timm8B</i>        | mitochondrial import inner membrane translocase                 | -1.1 | 2.3 | no  | yes | Conserved  | One 8 mer highly conserved                           |
| 188 | <i>Lrrc39</i>        | leucine-rich repeat-containing protein 39                       | 1.0  | 2.3 | no  | yes | Mouse only | Two overlapping 9 mers poorly conserved              |
| 189 | <i>Arhgap11A</i>     | Rho GTPase activating protein 11A                               | 1.1  | 2.3 | no  | yes | Conserved  | One 8 mer poorly, one 9 mer highly conserved         |
| 190 | <i>4930422G04Rik</i> | Mus musculus adult male testis cDNA, RIKEN full-length enriched | -1.0 | 2.3 | no  | yes | Mouse, Rat | Three 7 mers poorly conserved                        |
| 191 | <i>Apold1</i>        | apolipoprotein L domain-containing protein 1                    | 1.0  | 2.3 | no  | yes | Mouse, Rat | Two 8 mers poorly conserved                          |
| 192 | <i>Rgs18</i>         | regulator of G-protein signaling 18                             | -1.0 | 2.3 | no  | yes | Mouse only | One 7 mer poorly conserved                           |
| 193 | <i>Pdgfc</i>         | platelet-derived growth factor C                                | 1.0  | 2.3 | no  | yes | Conserved  | One 8 mer highly conserved                           |
| 194 | <i>Endod1</i>        | endonuclease domain-containing 1 protein                        | 1.0  | 2.3 | no  | yes | Conserved  | One 8 mer highly conserved                           |
| 195 | <i>Cox7A2</i>        | cytochrome c oxidase subunit 7A2, mitochondrial                 | -1.0 | 2.3 | no  | yes | Conserved  | One 8 mer highly conserved                           |
| 196 | <i>Slc11A2</i>       | natural resistance-associated macrophage protein                | 1.2  | 2.3 | no  | yes | Conserved  | One 7 mer highly conserved                           |
| 197 | <i>Pls1</i>          | plastin-1                                                       | 1.3  | 2.2 | no  | yes | Conserved  | One 8 mer moderately conserved                       |
| 198 | <i>Thbs1</i>         | thrombospondin-1                                                | 1.7  | 2.2 | no  | yes | Conserved  | One 8 mer, one 9 mer, one 7 mer all highly conserved |
| 199 | <i>Slc16A3</i>       | monocarboxylate transporter 4                                   | 1.3  | 2.2 | no  | yes | Conserved  | One 8 mer moderately conserved                       |
| 200 | <i>Cln8</i>          | protein CLN8                                                    | -1.0 | 2.2 | no  | yes | Conserved  | One 8 mer poorly, one 7 mer moderately conserved     |
| 201 | <i>Pdk1</i>          | pyruvate dehydrogenase kinase                                   | 1.9  | 2.2 | yes | yes | Mouse only | One 7 mer poorly conserved                           |
| 202 | <i>Atp8B4</i>        | ATPase, class I, type 8B, member 4                              | 1.2  | 2.2 | no  | yes | Conserved  | One 8 mer highly conserved                           |
| 203 | <i>Mthfd2</i>        | bifunctional methylenetetrahydrofolate                          | 1.4  | 2.2 | no  | yes | Conserved  | One 8 mer highly conserved                           |
| 204 | <i>Deb1</i>          | SS18-like protein 2                                             | -1.1 | 2.2 | no  | yes | Conserved  | One 8 mer moderately conserved                       |
| 205 | <i>Tab3</i>          | TGF-beta-activated kinase 1 and MAP3K7-binding                  | 1.0  | 2.2 | no  | yes | Conserved  | One 8 mer moderately conserved                       |

Supplemental Table 3 (continued)

|     |                  |                                                  |      |     |    |     |            |                                                          |
|-----|------------------|--------------------------------------------------|------|-----|----|-----|------------|----------------------------------------------------------|
| 206 | <i>Pla2G12A</i>  | group XIIA secretory phospholipase A2            | 1.0  | 2.2 | no | yes | Conserved  | One 9 mer moderately conserved                           |
| 207 | <i>Katnal1</i>   | katanin p60 ATPase-containing subunit A-like 1   | 1.0  | 2.2 | no | yes | Conserved  | One 9 mer poorly, one 8 mer highly, one 8 mer moderately |
| 208 | <i>Ugt1A7C</i>   | UDP-glucuronosyltransferase 1-7C precursor       | -1.0 | 2.2 | no | yes | Conserved  | One 8 mer moderately conserved                           |
| 209 | <i>Psme3</i>     | proteasome activator complex subunit 3           | 1.3  | 2.2 | no | yes | Conserved  | One 7 mer highly conserved                               |
| 210 | <i>Socs3</i>     | suppressor of cytokine signaling 3               | 1.1  | 2.2 | no | yes | Conserved  | One 7 mer highly, one 7 mer poorly conserved             |
| 211 | <i>Itsn1</i>     | intersectin-1 isoform 1                          | 1.1  | 2.2 | no | yes | Conserved  | One 9 mer highly, one 9 mer poorly conserved             |
| 212 | <i>Stat1</i>     | signal transducer and activator of transcription | 1.2  | 2.2 | no | yes | Mouse only | One 8 mer poorly conserved                               |
| 213 | <i>Ppp2R5B</i>   | serine/threonine-protein phosphatase 2A 56 kDa   | 1.1  | 2.2 | no | yes | Conserved  | One 8 mer, one 9 mer both highly conserved               |
| 214 | <i>Nudt12</i>    | peroxisomal NADH pyrophosphatase NUDT12          | 1.0  | 2.2 | no | yes | Mouse only | One 7 mer poorly conserved                               |
| 215 | <i>Cycc</i>      | cytochrome c, somatic                            | 1.0  | 2.1 | no | yes | Conserved  | One 9 mer highly, one 7 mer moderately conserved         |
| 216 | <i>Adpgk</i>     | ADP-dependent glucokinase precursor              | 1.1  | 2.1 | no | yes | Conserved  | One 8 mer highly conserved                               |
| 217 | <i>Pfdn4</i>     | prefoldin 4 isoform 3                            | 1.0  | 2.1 | no | yes | Conserved  | One 9 mer highly conserved                               |
| 218 | <i>Nlrc5</i>     | protein NLRC5                                    | -1.0 | 2.1 | no | yes | Mouse only | One 7 mer poorly conserved                               |
| 219 | <i>Pilra</i>     | Paired immunoglobulin-like type 2 receptor alpha | 1.0  | 2.1 | no | yes | Mouse only | One 9 mer poorly conserved                               |
| 220 | <i>Ehbp1L1</i>   | EH domain-binding protein 1-like protein 1       | 1.4  | 2.1 | no | yes | Conserved  | One 8 mer moderately conserved                           |
| 221 | <i>Plscr1</i>    | phospholipid scramblase 1                        | 1.0  | 2.1 | no | yes | Mouse, Rat | One 7 mer poorly conserved                               |
| 222 | <i>Atg4D</i>     | cysteine protease ATG4D                          | 1.2  | 2.1 | no | yes | Conserved  | One 8 mer moderately conserved                           |
| 223 | <i>Setd8</i>     | histone-lysine N-methyltransferase SETD8         | 1.1  | 2.1 | no | yes | Conserved  | One 8 mer highly conserved                               |
| 224 | <i>C1Galt1C1</i> | C1GALT1-specific chaperone 1                     | -1.0 | 2.1 | no | yes | Conserved  | One 7 mer highly, one 8 mer moderately conserved         |
| 225 | <i>Spon1</i>     | spondin-1 precursor                              | 1.3  | 2.1 | no | yes | Conserved  | One 7 mer moderately conserved                           |
| 226 | <i>Rasgrp4</i>   | RAS guanyl-releasing protein 4 isoform 1         | 1.2  | 2.1 | no | yes | Conserved  | One 7 mer moderately conserved                           |

Supplemental Table 3 (continued)

|     |                      |                                                 |      |     |     |     |            |                                                              |
|-----|----------------------|-------------------------------------------------|------|-----|-----|-----|------------|--------------------------------------------------------------|
| 227 | <i>Hs6St1</i>        | heparan-sulfate 6-O-sulfotransferase 1          | 1.3  | 2.1 | no  | yes | Conserved  | One 9 mer-8 mer overlap highly conserved                     |
| 228 | <i>2700097009Rik</i> | hypothetical protein LOC72658                   | -1.1 | 2.1 | no  | yes | Mouse, Rat | One 8 mer, one 9 mer both poorly conserved                   |
| 229 | <i>Fosl2</i>         | fos-related antigen 2                           | 1.4  | 2.1 | no  | yes | Conserved  | One 7 mer poorly, one 8 mer, one 9 mer both highly conserved |
| 230 | <i>Gpr88</i>         | probable G-protein coupled receptor 88          | 2.0  | 2.0 | no  | yes | Mouse only | One 7 mer poorly conserved                                   |
| 231 | <i>Kcnj2</i>         | inward rectifier potassium channel 2            | 1.0  | 2.0 | no  | yes | Conserved  | One 9 mer highly conserved                                   |
| 232 | <i>Kctd7</i>         | BTB/POZ domain-containing protein KCTD7         | 1.2  | 2.0 | no  | yes | Mouse, Rat | One 7 mer poorly conserved                                   |
| 233 | <i>Galnt3</i>        | polypeptide N-acetylgalactosaminyltransferase 3 | 1.2  | 2.0 | no  | yes | Conserved  | One 8 mer highly, one 7 mer moderately conserved             |
| 234 | <i>Mafg</i>          | transcription factor MafG                       | 1.0  | 2.0 | no  | yes | Conserved  | One 7 mer highly conserved                                   |
| 235 | <i>Cbx5</i>          | chromobox protein homolog 5                     | -1.0 | 2.0 | no  | yes | Conserved  | One 7 mer highly conserved                                   |
| 236 | <i>Mrpl20</i>        | 39S ribosomal protein L20, mitochondrial        | -1.2 | 2.0 | no  | yes | Conserved  | One 8 mer moderately conserved                               |
| 237 | <i>Mrpl33</i>        | 39S ribosomal protein L33, mitochondrial        | 1.0  | 2.0 | no  | yes | Conserved  | One 7 mer highly conserved                                   |
| 238 | <i>Znhit3</i>        | Znhit3 protein                                  | -1.2 | 2.0 | no  | yes | Mouse, Rat | One 7 mer poorly conserved                                   |
| 239 | <i>Olfir1033</i>     | olfactory receptor 1033                         | 1.0  | 2.0 | yes | yes | Mouse only | One 8 mer poorly conserved                                   |
| 240 | <i>Map4K5</i>        | mitogen-activated protein kinase kinase kinase  | 1.0  | 2.0 | no  | yes | Conserved  | One 9 mer highly conserved                                   |
| 241 | <i>Rnf11</i>         | RING finger protein 11                          | 1.2  | 2.0 | no  | yes | Conserved  | One 8 mer highly conserved                                   |
| 242 | <i>Yod1</i>          | ubiquitin thioesterase OTU1                     | -1.2 | 2.0 | no  | yes | Conserved  | One 7 mer, two 8 mers moderately, one 8 mer highly conserved |
| 243 | <i>Mospd1</i>        | motile sperm domain-containing protein 1        | 1.0  | 2.0 | no  | yes | Conserved  | One 9 mer moderately conserved                               |
| 244 | <i>Mri1</i>          | methylthioribose-1-phosphate isomerase          | 2.1  | 2.0 | no  | yes | Mouse, Rat | One 8 mer poorly conserved                                   |
| 245 | <i>Ndufs4</i>        | NADH dehydrogenase [ubiquinone] iron-sulfur     | -1.1 | 1.9 | no  | yes | Conserved  | One 7 mer highly conserved                                   |
| 246 | <i>Tmem106A</i>      | transmembrane protein 106A                      | 1.3  | 1.9 | no  | yes | Conserved  | One 8 mer moderately conserved                               |

Supplemental Table 3 (continued)

|     |                      |                                                                  |      |     |    |     |            |                                                         |
|-----|----------------------|------------------------------------------------------------------|------|-----|----|-----|------------|---------------------------------------------------------|
| 247 | <i>Ier3</i>          | radiation-inducible immediate-early gene IEX-1                   | 1.0  | 1.9 | no | yes | Conserved  | One 7 mer, one 8 mer highly, one 7 mer poorly conserved |
| 248 | <i>Acer3</i>         | alkaline ceramidase 3                                            | -1.2 | 1.9 | no | yes | Conserved  | Two 7 mers both moderately conserved                    |
| 249 | <i>Tmem194</i>       | transmembrane protein 194A isoform 1                             | 1.2  | 1.9 | no | yes | Mouse only | One 7 mer, one 9 mer both poorly conserved              |
| 250 | <i>Rpgrip1L</i>      | RPGR-interacting protein 1-like protein                          | 1.0  | 1.9 | no | yes | Conserved  | One 7 mer moderately conserved                          |
| 251 | <i>1600002H07Rik</i> | hypothetical protein LOC72016                                    | 1.1  | 1.9 | no | yes | Mouse only | One 7 mer poorly conserved                              |
| 252 | <i>Tbc1D24</i>       | TBC1 domain family member 24                                     | -1.2 | 1.9 | no | yes | Conserved  | One 8 mer, one 9 mer both moderately conserved          |
| 253 | <i>Bcor11</i>        | BCL-6 corepressor-like protein 1                                 | 1.5  | 1.9 | no | yes | Conserved  | One 8 mer highly conserved                              |
| 254 | <i>Prdx3</i>         | thioredoxin-dependent peroxide reductase                         | 1.2  | 1.9 | no | yes | Conserved  | One 8 mer moderately conserved                          |
| 255 | <i>Pot1B</i>         | hypothetical protein                                             | 1.1  | 1.9 | no | yes | Mouse, Rat | One 8 mer poorly conserved                              |
| 256 | <i>Rnf149</i>        | E3 ubiquitin-protein ligase RNF149 precursor                     | 1.1  | 1.9 | no | yes | Conserved  | One 7 mer highly conserved                              |
| 257 | <i>Ahi1</i>          | jouberin                                                         | 1.1  | 1.9 | no | yes | Conserved  | One 8 mer poorly, one 8 mer moderately conserved        |
| 258 | <i>Nhs2</i>          | NHS-like protein 2                                               | 1.0  | 1.9 | no | yes | Conserved  | One 8 mer highly, one 7 mer moderately conserved        |
| 259 | <i>Relt</i>          | tumor necrosis factor receptor superfamily, member 19-like, full | 1.2  | 1.9 | no | yes | Conserved  | Two 8 mers, both highly conserved                       |
| 260 | <i>Wdr67</i>         | WD repeat-containing protein 67 isoform 1                        | 1.0  | 1.9 | no | yes | Conserved  | One 8 mer highly conserved                              |
| 261 | <i>Nlrp3</i>         | NACHT, LRR and PYD domains-containing protein 3                  | 1.2  | 1.9 | no | yes | Conserved  | One 8 mer poorly, one 8 mer moderately conserved        |
| 262 | <i>Stx11</i>         | syntaxin-11                                                      | 1.2  | 1.9 | no | yes | Mouse, Rat | One 7 mer poorly conserved                              |
| 263 | <i>Magohb</i>        | protein mago nashi homolog 1-related                             | 1.2  | 1.9 | no | yes | Conserved  | One 7 mer moderately conserved                          |
| 264 | <i>Zcchc3</i>        | zinc finger, CCHC domain containing 3                            | 1.3  | 1.9 | no | yes | Conserved  | One 7 mer highly conserved                              |
| 265 | <i>Ncr1</i>          | Putative uncharacterized protein                                 | 1.2  | 1.9 | no | yes | Mouse, Rat | One 9 mer poorly conserved                              |
| 266 | <i>Mier3</i>         | mesoderm induction early response protein 3                      | 1.1  | 1.8 | no | yes | Conserved  | Two 8 mers, both highly conserved                       |

Supplemental Table 3 (continued)

|     |                 |                                                                 |      |     |    |     |            |                                                                      |
|-----|-----------------|-----------------------------------------------------------------|------|-----|----|-----|------------|----------------------------------------------------------------------|
| 267 | <i>Cish</i>     | cytokine-inducible SH2-containing protein                       | 1.3  | 1.8 | no | yes | Conserved  | Three overlapping (7 mer, 9 mer, 9 mer) all highly conserved         |
| 268 | <i>Yipf4</i>    | protein YIPF4                                                   | 1.2  | 1.8 | no | yes | Conserved  | Two overlapping 7 mers highly, two more 7 mers both highly conserved |
| 269 | <i>Slc25A17</i> | peroxisomal membrane protein PMP34                              | 1.5  | 1.8 | no | yes | Conserved  | Two 8 mers highly conserved                                          |
| 270 | <i>Ulk1</i>     | serine/threonine-protein kinase ULK1                            | 1.1  | 1.8 | no | yes | Conserved  | One 8 mer highly conserved                                           |
| 271 | <i>Picalm</i>   | phosphatidylinositol-binding clathrin assembly                  | 1.0  | 1.8 | no | yes | Conserved  | Two 7 mers overlap both highly conserved                             |
| 272 | <i>Eif4A1</i>   | eukaryotic initiation factor 4A-I isoform 1                     | 1.1  | 1.8 | no | yes | Conserved  | One 8 mer highly conserved                                           |
| 273 | <i>Hnrpl</i>    | heterogeneous nuclear ribonucleoprotein L-like                  | -1.1 | 1.8 | no | yes | Conserved  | One 8 mer highly conserved                                           |
| 274 | <i>Nudt5</i>    | ADP-sugar pyrophosphatase                                       | 1.0  | 1.8 | no | yes | Conserved  | One 8 mer moderately conserved                                       |
| 275 | <i>Cops2</i>    | COP9 signalosome complex subunit 2                              | -1.1 | 1.8 | no | yes | Conserved  | One 7 mer highly conserved                                           |
| 276 | <i>Sept3</i>    | neuronal-specific septin-3                                      | 1.0  | 1.8 | no | yes | Conserved  | One 8 mer highly conserved                                           |
| 277 | <i>Celsr1</i>   | cadherin EGF LAG seven-pass G-type receptor 1                   | 1.0  | 1.8 | no | yes | Conserved  | One 8 mer highly, one 8 mer poorly conserved                         |
| 278 | <i>Eef1E1</i>   | eukaryotic translation elongation factor 1                      | 1.1  | 1.8 | no | yes | Conserved  | One 8 mer moderately, one 7 mer highly conserved                     |
| 279 | <i>Gm8369</i>   | membrane-spanning 4-domains, subfamily A, member                | 1.7  | 1.8 | no | yes | Mouse, Rat | One 7 mer poorly conserved                                           |
| 280 | <i>Agap1</i>    | arf-GAP with GTPase, ANK repeat and PH                          | 1.1  | 1.8 | no | yes | Conserved  | One 8 mer highly conserved                                           |
| 281 | <i>Asap3</i>    | Hypothetical ankyrin repeat profile/serine-rich region/ankyrin- | 1.1  | 1.8 | no | yes | Mouse only | One 8 mer poorly conserved                                           |
| 282 | <i>Neto2</i>    | Neto2 protein                                                   | 1.0  | 1.8 | no | yes | Conserved  | Two 8 mers, both moderately conserved                                |
| 283 | <i>Arl6lp6</i>  | ADP-ribosylation factor-like protein                            | 1.1  | 1.8 | no | yes | Conserved  | Two 7 mers, both moderately conserved                                |
| 284 | <i>Plod2</i>    | procollagen-lysine,2-oxoglutarate 5-dioxygenase                 | 1.1  | 1.8 | no | yes | Conserved  | Two 8 mers, both highly conserved                                    |
| 285 | <i>Slnf5</i>    | schlafen family member 5                                        | 1.1  | 1.8 | no | yes | Conserved  | One 8 mer, one 7 mer, both moderately conserved                      |
| 286 | <i>Usp1</i>     | ubiquitin carboxyl-terminal hydrolase 1                         | 1.0  | 1.8 | no | yes | Conserved  | One 7 mer highly conserved                                           |

Supplemental Table 3 (continued)

|     |                      |                                                  |      |     |    |     |            |                                                                |
|-----|----------------------|--------------------------------------------------|------|-----|----|-----|------------|----------------------------------------------------------------|
| 287 | <i>Med30</i>         | mediator of RNA polymerase II transcription      | 1.2  | 1.8 | no | yes | Conserved  | One 8 mer moderately conserved                                 |
| 288 | <i>Klf11</i>         | Krueppel-like factor 11                          | 1.2  | 1.8 | no | yes | Conserved  | One 8 mer highly conserved                                     |
| 289 | <i>Il1A</i>          | interleukin-1 alpha precursor                    | -1.1 | 1.8 | no | yes | Conserved  | Three 7 mers, all highly conserved                             |
| 290 | <i>Mesdc1</i>        | mesoderm development candidate 1                 | 1.4  | 1.8 | no | yes | Conserved  | One 8 mer highly conserved                                     |
| 291 | <i>Fundc2</i>        | FUN14 domain-containing protein 2                | -1.0 | 1.8 | no | yes | Conserved  | One 7 mer moderately, one 8 mer moderately to poorly conserved |
| 292 | <i>B230120H23Rik</i> | mitogen-activated protein kinase kinase kinase   | -1.1 | 1.8 | no | yes | Conserved  | One 7 mer highly conserved                                     |
| 293 | <i>Cbwd1</i>         | Cobalamin synthase W domain-containing protein 1 | 1.1  | 1.8 | no | yes | Conserved  | One 8 mer highly conserved                                     |
| 294 | <i>Rbm47</i>         | RNA-binding protein 47                           | 1.2  | 1.7 | no | yes | Conserved  | One 7 mer, one 8 mer both highly conserved                     |
| 295 | <i>Tmx4</i>          | thioredoxin-related transmembrane protein 4      | 1.0  | 1.7 | no | yes | Mouse, Rat | Two 8 mers poorly conserved                                    |
| 296 | <i>Palb2</i>         | partner and localizer of BRCA2                   | 1.1  | 1.7 | no | yes | Conserved  | One 8 mer highly conserved                                     |
| 297 | <i>Tmtc4</i>         | transmembrane and TPR repeat-containing protein  | 1.5  | 1.7 | no | yes | Conserved  | One 8 mer, one 7 mer both moderately conserved                 |
| 298 | <i>Mrp141</i>        | 39S ribosomal protein L41, mitochondrial         | -1.0 | 1.7 | no | yes | Mouse, Rat | One 8 mer poorly conserved                                     |
| 299 | <i>Gdpd1</i>         | glycerophosphodiester phosphodiesterase          | 1.2  | 1.7 | no | yes | Conserved  | One 8 mer highly conserved                                     |
| 300 | <i>Tbx21</i>         | T-box transcription factor TBX21                 | 1.9  | 1.7 | no | yes | Conserved  | One 8 mer highly conserved                                     |
| 301 | <i>Glpr2</i>         | Golgi-associated plant pathogenesis-related      | 1.1  | 1.7 | no | yes | Conserved  | One 7 mer moderately conserved                                 |
| 302 | <i>Uchl5</i>         | ubiquitin carboxyl-terminal hydrolase isozyme L5 | 1.2  | 1.7 | no | yes | Mouse, Rat | One 9 mer poorly conserved                                     |
| 303 | <i>Ghitm</i>         | growth hormone-inducible transmembrane protein   | 1.2  | 1.7 | no | yes | Conserved  | One 8 mer highly conserved                                     |
| 304 | <i>Ell2</i>          | RNA polymerase II elongation factor ELL2         | 1.2  | 1.7 | no | yes | Conserved  | One 9 mer, one 7 mer both highly conserved                     |
| 305 | <i>Slc30A9</i>       | zinc transporter 9                               | -1.0 | 1.7 | no | yes | Conserved  | One 7 mer highly conserved                                     |
| 306 | <i>H2-T24</i>        | histocompatibility 2, T region locus 24          | 1.1  | 1.7 | no | yes | Mouse only | One 9 mer poorly conserved                                     |

Supplemental Table 3 (continued)

|     |                 |                                                  |      |     |    |     |            |                                                                 |
|-----|-----------------|--------------------------------------------------|------|-----|----|-----|------------|-----------------------------------------------------------------|
| 307 | <i>Ctsb</i>     | cathepsin B preproprotein                        | 1.4  | 1.7 | no | yes | Mouse, Rat | One 8 mer poorly conserved                                      |
| 308 | <i>Dgkg</i>     | diacylglycerol kinase gamma                      | 1.0  | 1.7 | no | yes | Conserved  | Two 8 mers highly conserved                                     |
| 309 | <i>Tmem215</i>  | transmembrane protein 215                        | 1.9  | 1.7 | no | yes | Conserved  | One 8 mer moderately conserved                                  |
| 310 | <i>Tinagl1</i>  | tubulointerstitial nephritis antigen-like        | 1.5  | 1.7 | no | yes | Conserved  | One 8 mer highly conserved                                      |
| 311 | <i>Dnajc6</i>   | putative tyrosine-protein phosphatase auxilin    | 1.0  | 1.7 | no | yes | Conserved  | One 7 mer poorly, three 8 mers highly conserved                 |
| 312 | <i>Dgat2</i>    | diacylglycerol O-acyltransferase 2               | -1.4 | 1.7 | no | yes | Mouse, Rat | One 7 mer poorly conserved                                      |
| 313 | <i>Cpd</i>      | carboxypeptidase D precursor                     | -1.0 | 1.7 | no | yes | Conserved  | One 7 mer poorly conserved                                      |
| 314 | <i>Ran</i>      | GTP-binding nuclear protein Ran                  | 1.3  | 1.7 | no | yes | Conserved  | One 7 mer highly conserved                                      |
| 315 | <i>Tcf7L2</i>   | transcription factor 7-like 2                    | 1.1  | 1.7 | no | yes | Conserved  | One 8 mer highly conserved                                      |
| 316 | <i>Xkr5</i>     | XK-related protein 5                             | 1.0  | 1.7 | no | yes | Mouse only | One 8 mer poorly conserved                                      |
| 317 | <i>Daam1</i>    | disheveled-associated activator of morphogenesis | -1.0 | 1.7 | no | yes | Conserved  | One 7 mer, one 9 mer and one 8 mer all highly conserved         |
| 318 | <i>Cd300A</i>   | CMRF35-like molecule 8                           | 1.2  | 1.7 | no | yes | Mouse only | Two 9 mers poorly conserved                                     |
| 319 | <i>Snrpb2</i>   | U2 small nuclear ribonucleoprotein B             | 1.0  | 1.7 | no | yes | Conserved  | One 8 mer highly conserved                                      |
| 320 | <i>Dmxl2</i>    | dmX-like protein 2                               | -1.2 | 1.7 | no | yes | Conserved  | One 9 mer highly conserved                                      |
| 321 | <i>Stk3</i>     | serine/threonine-protein kinase 3                | -1.1 | 1.7 | no | yes | Conserved  | One 8 mer highly, one 9 mer-8 mer overlap both highly conserved |
| 322 | <i>Slc22A15</i> | hypothetical protein                             | 1.0  | 1.7 | no | yes | Mouse, Rat | One 7 mer poorly conserved                                      |
| 323 | <i>Zfand6</i>   | AN1-type zinc finger protein 6                   | 1.1  | 1.7 | no | yes | Conserved  | Two 7 mers highly conserved                                     |
| 324 | <i>Timm17A</i>  | mitochondrial import inner membrane translocase  | 1.2  | 1.7 | no | yes | Conserved  | One 9 mer highly conserved                                      |
| 325 | <i>Cox11</i>    | cytochrome c oxidase assembly protein COX11,     | -1.0 | 1.7 | no | yes | Conserved  | One 8 mer moderately conserved                                  |
| 326 | <i>Usp14</i>    | ubiquitin carboxyl-terminal hydrolase            | 1.1  | 1.7 | no | yes | Conserved  | One 7 mer highly conserved                                      |

Supplemental Table 3 (continued)

|     |                 |                                                  |      |     |         |     |            |                                                                  |
|-----|-----------------|--------------------------------------------------|------|-----|---------|-----|------------|------------------------------------------------------------------|
| 327 | <i>Myo19</i>    | Myosin head domain-containing protein 1          | -1.0 | 1.7 | no      | yes | Conserved  | One 7 mer moderately conserved                                   |
| 328 | <i>Immp1L</i>   | mitochondrial inner membrane protease subunit 1  | -1.0 | 1.7 | no      | yes | Mouse only | One 7 mer poorly conserved                                       |
| 329 | <i>Usp25</i>    | ubiquitin carboxyl-terminal hydrolase 25         | 1.2  | 1.7 | no      | yes | Conserved  | One 8 mer highly conserved                                       |
| 330 | <i>Mpl</i>      | thrombopoietin receptor                          | 1.1  | 1.7 | no      | yes | Mouse, Rat | One 8 mer poorly conserved                                       |
| 331 | <i>Arhgef12</i> | rho guanine nucleotide exchange factor 12        | 1.1  | 1.7 | no      | yes | Conserved  | One 8 mer highly, one 8 mer moderately conserved                 |
| 332 | <i>Il12B</i>    | interleukin-12 subunit beta precursor            | 1.0  | 1.7 | no      | yes | Conserved  | One 8 mer highly conserved                                       |
| 333 | <i>Kif1A</i>    | kinesin-like protein KIF1A isoform a             | 1.0  | 1.7 | no      | yes | Conserved  | One 8 mer moderately conserved                                   |
| 334 | <i>Mrp151</i>   | 39S ribosomal protein L51, mitochondrial         | 1.2  | 1.7 | no      | yes | Mouse, Rat | One 8 mer poorly conserved                                       |
| 335 | <i>Tmtc3</i>    | transmembrane and TPR repeat-containing protein  | -1.2 | 1.7 | no      | yes | Conserved  | Two 8 mers both highly conserved                                 |
| 336 | <i>Vbp1</i>     | prefoldin subunit 3                              | 1.1  | 1.7 | no      | yes | Conserved  | One 9 mer-8 mer overlap moderately conserved                     |
| 337 | <i>Chac1</i>    | cation transport regulator-like protein 1        | 1.0  | 1.7 | no      | yes | Conserved  | One 8 mer highly conserved                                       |
| 338 | <i>Myb1</i>     | myb-related protein A                            | 1.0  | 1.7 | no      | yes | Conserved  | One 7 mer moderately, one 8 mer, one 7 mer both highly conserved |
| 339 | <i>Itga5</i>    | integrin alpha-5 preproprotein                   | 1.1  | 1.7 | no      | yes | Conserved  | One 7 mer moderately conserved                                   |
| 340 | <i>Trim37</i>   | E3 ubiquitin-protein ligase TRIM37               | 1.1  | 1.7 | no      | yes | Mouse, Rat | Two seven mers poorly conserved                                  |
| 341 | <i>Ubiad1</i>   | ubiA prenyltransferase domain-containing protein | 2.0  | 1.7 | no; yes | yes | Conserved  | One 8 mer highly conserved                                       |
| 342 | <i>Srm</i>      | spermidine synthase                              | 1.4  | 1.7 | no      | yes | Conserved  | One 8 mer moderately conserved                                   |
| 343 | <i>Aa986860</i> | specifically androgen-regulated gene protein     | 1.0  | 1.6 | no      | yes | Conserved  | One 7 mer moderately conserved                                   |
| 344 | <i>Ccdc62</i>   | coiled-coil domain containing 62                 | 1.0  | 1.6 | no      | yes | Mouse only | One 8 mer poorly conserved                                       |
| 345 | <i>Gm13154</i>  | hypothetical protein LOC433804                   | 1.0  | 1.6 | yes     | yes | Mouse, Rat | Two 7 mers poorly conserved                                      |
| 346 | <i>Tuft1</i>    | tuftelin                                         | 1.1  | 1.6 | no      | yes | Conserved  | One 8 mer highly conserved                                       |



Supplemental Table 3 (continued)

|     |                |                                             |      |     |    |     |            |                                                              |
|-----|----------------|---------------------------------------------|------|-----|----|-----|------------|--------------------------------------------------------------|
| 347 | <i>Eif5</i>    | eukaryotic translation initiation factor 5  | 1.1  | 1.6 | no | yes | Conserved  | One 8 mer highly conserved                                   |
| 348 | <i>Ppp1R3B</i> | protein phosphatase 1 regulatory subunit 3B | 1.2  | 1.6 | no | yes | Conserved  | Two 8 mers highly conserved                                  |
| 349 | <i>Ncoa7</i>   | Nuclear receptor coactivator 7              | -1.2 | 1.6 | no | yes | Conserved  | One 7 mer, one 9 mer both highly, one 9 mer poorly conserved |
| 350 | <i>Gas2</i>    | growth arrest-specific protein 2            | 1.0  | 1.6 | no | yes | Conserved  | One 8 mer highly conserved                                   |
| 351 | <i>Eif2S1</i>  | eukaryotic translation initiation factor 2  | -1.0 | 1.6 | no | yes | Mouse, Rat | One 8 mer poorly conserved                                   |
| 352 | <i>Dcaf12</i>  | DDB1- and CUL4-associated factor 12         | 1.4  | 1.6 | no | yes | Conserved  | One 7 mer highly conserved                                   |
| 353 | <i>Fgl2</i>    | fibroleukin precursor                       | -1.1 | 1.6 | no | yes | Conserved  | One 8 mer poorly, one 8 mer moderately conserved             |
| 354 | <i>Sort1</i>   | sortilin precursor                          | 1.1  | 1.6 | no | yes | Mouse only | One 9 mer poorly conserved                                   |
| 355 | <i>Neur1A</i>  | neuralized-like protein 1A                  | 1.0  | 1.6 | no | yes | Conserved  | One 9 mer highly conserved                                   |
| 356 | <i>Stxbp4</i>  | syntaxin-binding protein 4                  | 1.2  | 1.6 | no | yes | Conserved  | One 8 mer moderately conserved                               |
| 357 | <i>Pkn2</i>    | serine/threonine-protein kinase N2          | -1.0 | 1.6 | no | yes | Conserved  | One 7 mer highly conserved                                   |
| 358 | <i>Armc9</i>   | lisH domain-containing protein ARMC9        | 1.2  | 1.6 | no | yes | Mouse, Rat | One 7 mer poorly conserved                                   |
| 359 | <i>Vcam1</i>   | vascular cell adhesion protein 1 precursor  | -1.1 | 1.6 | no | yes | Conserved  | One 7 mer highly conserved                                   |
| 360 | <i>Rnf139</i>  | E3 ubiquitin-protein ligase RNF139          | 1.0  | 1.6 | no | yes | Mouse, Rat | Two 7 mers both poorly conserved                             |
| 361 | <i>Nup35</i>   | nucleoporin NUP53 isoform 2                 | -1.2 | 1.6 | no | yes | Mouse, Rat | One 7 mer poorly conserved                                   |
| 362 | <i>Fbxo42</i>  | F-box only protein 42                       | 1.2  | 1.6 | no | yes | Conserved  | One 7 mer highly conserved                                   |
| 363 | <i>Gtf2A2</i>  | general transcription factor II A           | 1.1  | 1.6 | no | yes | Conserved  | One 9 mer highly conserved                                   |
| 364 | <i>Tubb3</i>   | tubulin beta-3 chain                        | 1.0  | 1.6 | no | yes | Conserved  | One 7 mer highly, one 7 mer poorly conserved                 |
| 365 | <i>Coro2B</i>  | coronin-2B                                  | 1.0  | 1.6 | no | yes | Conserved  | One 8 mer highly conserved                                   |
| 366 | <i>Gatm</i>    | glycine amidinotransferase, mitochondrial   | 1.0  | 1.6 | no | yes | Mouse only | Two 7 mers poorly conserved                                  |
| 367 | <i>Cox17</i>   | cytochrome c oxidase copper chaperone       | 1.3  | 1.6 | no | yes | Conserved  | One 7 mer highly conserved                                   |

Supplemental Table 3 (continued)

|     |                      |                                                 |      |     |    |     |            |                                                       |
|-----|----------------------|-------------------------------------------------|------|-----|----|-----|------------|-------------------------------------------------------|
| 368 | <i>Snrnp27</i>       | U4/U6.U5 small nuclear ribonucleoprotein 27 kDa | 1.0  | 1.6 | no | yes | Conserved  | One 8 mer highly, one 8 mer poorly conserved          |
| 369 | <i>Rad21</i>         | double-strand-break repair protein rad21        | 1.3  | 1.6 | no | yes | Conserved  | One 8 mer highly conserved                            |
| 370 | <i>Synj1</i>         | synaptotjanin-1                                 | 1.1  | 1.6 | no | yes | Mouse, Rat | Two 7 mers both poorly conserved                      |
| 371 | <i>Nudcd1</i>        | nudC domain-containing protein 1                | 1.0  | 1.6 | no | yes | Conserved  | One 7 mer highly, one 7 mer moderately conserved      |
| 372 | <i>Cbx3</i>          | chromobox protein homolog 3                     | 1.1  | 1.6 | no | yes | Conserved  | One 7 mer moderately conserved                        |
| 373 | <i>Cdca4</i>         | cell division cycle-associated protein 4        | 1.1  | 1.6 | no | yes | Conserved  | One 8 mer, one 7 mer both highly conserved            |
| 374 | <i>Il15Ra</i>        | interleukin 15 receptor, alpha chain            | -1.1 | 1.6 | no | yes | Conserved  | One 7 mer highly conserved                            |
| 375 | <i>Mfap3L</i>        | microfibrillar-associated protein 3-like        | 1.0  | 1.6 | no | yes | Conserved  | One 8 mer highly, one 7 mer moderately conserved      |
| 376 | <i>Zmynd19</i>       | zinc finger MYND domain-containing protein 19   | 1.1  | 1.6 | no | yes | Conserved  | One 8 mer highly conserved                            |
| 377 | <i>Samd3</i>         | sterile alpha motif domain-containing protein 3 | 1.2  | 1.6 | no | yes | Mouse, Rat | Two 7 mers both poorly conserved                      |
| 378 | <i>Myef2</i>         | myelin expression factor 2 isoform 2            | 1.0  | 1.6 | no | yes | Conserved  | One 8 mer highly conserved                            |
| 379 | <i>Trpc6</i>         | short transient receptor potential channel 6    | 1.0  | 1.6 | no | yes | Conserved  | One 8 mer highly conserved                            |
| 380 | <i>S1Pr5</i>         | sphingosine 1-phosphate receptor 5              | 1.0  | 1.6 | no | yes | Mouse only | One 9 mer poorly conserved                            |
| 381 | <i>Cdk2</i>          | cell division protein kinase 2                  | 1.3  | 1.6 | no | yes | Conserved  | One 7 mer highly conserved                            |
| 382 | <i>Wdr26</i>         | WD repeat-containing protein 26                 | -1.0 | 1.6 | no | yes | Conserved  | One 7 mer highly conserved                            |
| 383 | <i>Atp6V0E</i>       | V-type proton ATPase subunit e 1                | 1.1  | 1.6 | no | yes | Mouse only | One 8 mer, one 9 mer, two 8 mers all poorly conserved |
| 384 | <i>Mrps14</i>        | 28S ribosomal protein S14, mitochondrial        | 1.1  | 1.6 | no | yes | Mouse only | One 7 mer poorly conserved                            |
| 385 | <i>Riok3</i>         | serine/threonine-protein kinase RIO3            | 1.2  | 1.6 | no | yes | Conserved  | One 7 mer highly conserved                            |
| 386 | <i>Cttnbp2</i>       | cortactin-binding protein 2                     | 1.0  | 1.6 | no | yes | Conserved  | One 7 mer highly, one 7 mer moderately conserved      |
| 387 | <i>Sh3Glb1</i>       | endophilin-B1                                   | 1.1  | 1.6 | no | yes | Mouse, Rat | One 8 mer poorly conserved                            |
| 388 | <i>6030458C11Rik</i> | PF0489 protein C5orf22 homolog                  | -1.1 | 1.6 | no | yes | Conserved  | One 9 mer moderately conserved                        |

Supplemental Table 3 (continued)

|     |                |                                                |      |     |    |     |            |                                                          |
|-----|----------------|------------------------------------------------|------|-----|----|-----|------------|----------------------------------------------------------|
| 389 | <i>Dmwd</i>    | dystrophia myotonica WD repeat-containing      | 1.2  | 1.6 | no | yes | Conserved  | One 8 mer highly conserved                               |
| 390 | <i>Rnd1</i>    | rho-related GTP-binding protein Rho6 precursor | 1.0  | 1.6 | no | yes | Conserved  | One 8 mer highly conserved                               |
| 391 | <i>Arl5A</i>   | ADP-ribosylation factor-like protein 5A        | 1.5  | 1.6 | no | yes | Conserved  | One 7 mer highly conserved                               |
| 392 | <i>Fgr</i>     | tyrosine-protein kinase Fgr                    | 1.3  | 1.6 | no | yes | Conserved  | One 8 mer highly conserved                               |
| 393 | <i>Ap1S2</i>   | AP-1 complex subunit sigma-2                   | -1.1 | 1.5 | no | yes | Mouse, Rat | One 7 mer, one 8 mer, another 7 mer all poorly conserved |
| 394 | <i>Plau</i>    | Plasminogen activator, urokinase               | 1.3  | 1.5 | no | yes | Conserved  | One 8 mer moderately conserved,                          |
| 395 | <i>Hspbap1</i> | HSPB1-associated protein 1                     | 1.1  | 1.5 | no | yes | Mouse, Rat | One 9 mer, one 8 mer both poorly conserved               |

**Supplemental Table 4: Analysis of exonic vs. intronic RNA-Seq reads**

Shown are the ratios of the average double KO and triple KO exon and intron reads to the average WT exon and intron reads for each group of samples for the 385 transcripts that were up-regulated in the triple KO RNA-Seq dataset but not in the double KO dataset. We excluded 10 of the 395 transcripts from this analysis because of low read counts in some of the samples, leaving 395 evaluable transcripts. Shown also are the "ratios of ratios" for exon and intron reads. Fifty-two transcripts were found to have "ratios of ratios" greater than 1.5 (indicated in green). All the transcripts contained at least one potential TTP binding site 7-mer. Five additional transcripts were identified by subjective evaluation of expression patterns alone (indicated in red).

| Gene Symbol          | DKO/WT exon | TKO/WT exon | DKO/WT intron | TKO/WT intron | Ratio DKO exon ratio/DKO intron ratio | Ratio TKO exon ratio/TKO intron ratio |
|----------------------|-------------|-------------|---------------|---------------|---------------------------------------|---------------------------------------|
| <i>Apol11b</i>       | 10.13       | 748.30      | 2.05          | 1003.13       | 4.94                                  | 0.75                                  |
| <i>Lif</i>           | 4.11        | 68.11       | 2.52          | 78.09         | 1.63                                  | 0.87                                  |
| <i>Gypa</i>          | 1.62        | 43.20       | 1.14          | 103.69        | 1.42                                  | 0.42                                  |
| <i>Slfn4</i>         | 1.34        | 33.46       | 1.30          | 47.53         | 1.03                                  | 0.70                                  |
| <i>Tmcc2</i>         | 1.32        | 19.73       | 0.94          | 17.84         | 1.40                                  | 1.11                                  |
| <i>Tfre*</i>         | 0.94        | 15.24       | 0.65          | 3.75          | 1.45                                  | 4.06                                  |
| <i>Abcg4</i>         | 1.17        | 34.26       | 0.81          | 47.30         | 1.44                                  | 0.72                                  |
| <i>Oas3</i>          | 1.81        | 13.40       | 1.28          | 14.30         | 1.41                                  | 0.94                                  |
| <i>E2f8</i>          | 1.14        | 10.74       | 0.71          | 13.77         | 1.61                                  | 0.78                                  |
| <i>Birc5</i>         | 1.11        | 11.28       | 0.66          | 13.56         | 1.68                                  | 0.83                                  |
| <i>Cenpf</i>         | 0.94        | 10.25       | 0.78          | 16.71         | 1.21                                  | 0.61                                  |
| <i>Sox6</i>          | 1.39        | 33.96       | 1.09          | 47.97         | 1.28                                  | 0.71                                  |
| <i>Sgol1</i>         | 0.86        | 10.76       | 0.80          | 11.74         | 1.08                                  | 0.92                                  |
| <i>Kif18b</i>        | 1.25        | 9.85        | 0.61          | 9.96          | 2.05                                  | 0.99                                  |
| <i>Cdc6</i>          | 1.20        | 9.39        | 0.61          | 8.22          | 1.97                                  | 1.14                                  |
| <i>Lmo2</i>          | 1.25        | 1.63        | 0.92          | 1.46          | 1.35                                  | 1.12                                  |
| <i>Gpr146</i>        | 0.92        | 1.26        | 0.73          | 1.25          | 1.26                                  | 1.01                                  |
| <i>Cna2</i>          | 1.11        | 9.12        | 0.67          | 13.96         | 1.66                                  | 0.65                                  |
| <i>Tmem56</i>        | 1.03        | 23.40       | 1.93          | 21.75         | 0.53                                  | 1.08                                  |
| <i>Depdc1a</i>       | 0.73        | 13.91       | 0.66          | 9.00          | 1.11                                  | 1.55                                  |
| <i>Clcn3</i>         | 0.96        | 2.13        | 0.63          | 2.38          | 1.52                                  | 0.90                                  |
| <i>Anln</i>          | 0.92        | 1.29        | 0.78          | 0.97          | 1.18                                  | 1.33                                  |
| <i>Kntc1</i>         | 1.11        | 8.07        | 0.63          | 5.24          | 1.76                                  | 1.54                                  |
| <i>Ifi44</i>         | 1.44        | 8.64        | 1.26          | 7.57          | 1.14                                  | 1.14                                  |
| <i>Ccne2</i>         | 0.80        | 13.24       | 0.68          | 4.66          | 1.18                                  | 2.84                                  |
| <i>Ccnb1</i>         | 0.99        | 8.02        | 0.86          | 10.19         | 1.15                                  | 0.79                                  |
| <i>Slc25a2l</i>      | 0.76        | 9.49        | 0.74          | 29.56         | 1.03                                  | 0.32                                  |
| <i>Ncapg*</i>        | 0.87        | 7.20        | 0.73          | 3.42          | 1.19                                  | 2.11                                  |
| <i>Prc1</i>          | 0.95        | 7.48        | 0.79          | 3.75          | 1.20                                  | 1.99                                  |
| <i>Clspn</i>         | 1.04        | 7.69        | 0.93          | 9.71          | 1.12                                  | 0.79                                  |
| <i>Ache</i>          | 1.19        | 7.44        | 0.95          | 10.08         | 1.25                                  | 0.74                                  |
| <i>Chac2</i>         | 1.01        | 7.32        | 0.66          | 4.43          | 1.53                                  | 1.65                                  |
| <i>Fam109b</i>       | 0.72        | 7.90        | 0.50          | 7.72          | 1.44                                  | 1.02                                  |
| <i>Kif18a</i>        | 0.69        | 7.15        | 0.64          | 5.39          | 1.08                                  | 1.33                                  |
| <i>C530008M17Rik</i> | 1.20        | 7.00        | 0.61          | 6.05          | 1.97                                  | 1.16                                  |
| <i>Nt5c3</i>         | 1.11        | 5.42        | 0.77          | 4.19          | 1.44                                  | 1.29                                  |
| <i>Nuf2</i>          | 1.13        | 7.14        | 0.93          | 9.56          | 1.22                                  | 0.75                                  |
| <i>Pif1</i>          | 1.07        | 7.39        | 0.89          | 8.78          | 1.20                                  | 0.84                                  |
| <i>Odf2</i>          | 1.14        | 1.31        | 0.82          | 1.34          | 1.39                                  | 0.98                                  |
| <i>Cenpe</i>         | 0.86        | 6.81        | 0.76          | 6.98          | 1.13                                  | 0.98                                  |
| <i>Gda</i>           | 1.10        | 6.82        | 0.74          | 19.27         | 1.49                                  | 0.35                                  |
| <i>Kif14</i>         | 0.98        | 9.47        | 0.62          | 12.29         | 1.58                                  | 0.77                                  |
| <i>Cenpi</i>         | 0.82        | 6.19        | 0.83          | 5.56          | 0.99                                  | 1.11                                  |
| <i>C5ar1</i>         | 1.13        | 6.64        | 0.84          | 14.24         | 1.35                                  | 0.47                                  |
| <i>Bub1</i>          | 0.77        | 6.82        | 0.73          | 6.76          | 1.05                                  | 1.01                                  |
| <i>Lilra5</i>        | 2.74        | 5.74        | 2.05          | 4.67          | 1.34                                  | 1.23                                  |
| <i>Kifc1</i>         | 1.19        | 6.12        | 0.65          | 6.12          | 1.83                                  | 1.00                                  |
| <i>Slc14A1</i>       | 0.90        | 1.45        | 0.67          | 0.62          | 1.35                                  | 2.34                                  |
| <i>Nek2</i>          | 1.18        | 5.80        | 0.77          | 10.95         | 1.53                                  | 0.53                                  |
| <i>Mmp9</i>          | 1.25        | 5.68        | 1.19          | 9.56          | 1.05                                  | 0.59                                  |
| <i>Kif2c</i>         | 1.08        | 5.60        | 0.65          | 7.39          | 1.66                                  | 0.76                                  |
| <i>Ppp1r15a</i>      | 1.09        | 5.43        | 1.45          | 3.97          | 0.75                                  | 1.37                                  |
| <i>Hmgb2*</i>        | 0.95        | 5.38        | 0.90          | 4.14          | 1.06                                  | 1.30                                  |
| <i>Pip5K1B</i>       | 1.17        | 3.39        | 0.74          | 5.55          | 1.58                                  | 0.61                                  |
| <i>Mfsd2b</i>        | 1.08        | 5.22        | 0.63          | 6.09          | 1.71                                  | 0.86                                  |
| <i>Usp18</i>         | 1.40        | 4.04        | 0.94          | 1.63          | 1.49                                  | 2.48                                  |
| <i>Tjdp2</i>         | 1.03        | 4.48        | 0.61          | 5.04          | 1.69                                  | 0.89                                  |
| <i>March8</i>        | 0.84        | 5.01        | 0.69          | 13.35         | 1.22                                  | 0.38                                  |
| <i>Slc25a37</i>      | 1.13        | 4.96        | 0.87          | 3.61          | 1.30                                  | 1.37                                  |
| <i>C330027C09Rik</i> | 0.82        | 4.93        | 0.73          | 3.58          | 1.12                                  | 1.38                                  |
| <i>Tjap1</i>         | 1.12        | 0.96        | 0.97          | 1.36          | 1.16                                  | 0.71                                  |
| <i>Xpo7</i>          | 1.02        | 4.89        | 0.64          | 7.48          | 2.48                                  | 0.65                                  |
| <i>Mpp2</i>          | 1.06        | 4.74        | 0.76          | 7.15          | 1.39                                  | 0.66                                  |
| <i>Slc16a10</i>      | 1.02        | 4.75        | 0.58          | 5.40          | 1.76                                  | 0.88                                  |
| <i>4930430F08Rik</i> | 0.93        | 4.58        | 0.89          | 2.84          | 1.05                                  | 1.61                                  |
| <i>Ncapg2</i>        | 0.72        | 4.71        | 0.40          | 2.81          | 1.80                                  | 1.68                                  |
| <i>Slc2a4</i>        | 0.88        | 22.02       | 0.46          | 66.55         | 1.91                                  | 0.33                                  |
| <i>Ube2t</i>         | 0.88        | 4.64        | 0.92          | 4.06          | 0.96                                  | 1.14                                  |
| <i>Iqgap3</i>        | 0.87        | 4.55        | 0.58          | 5.33          | 1.50                                  | 0.85                                  |
| <i>Pask</i>          | 0.95        | 4.54        | 0.73          | 5.07          | 1.30                                  | 0.90                                  |
| <i>Ifi1</i>          | 1.13        | 4.99        | 0.14          | 12.42         | 7.94                                  | 0.40                                  |
| <i>Sgol2</i>         | 0.84        | 5.54        | 0.62          | 6.23          | 1.35                                  | 0.89                                  |
| <i>Cep76*</i>        | 0.99        | 4.50        | 0.79          | 2.63          | 1.25                                  | 1.71                                  |
| <i>Troap</i>         | 0.95        | 6.39        | 0.62          | 7.61          | 1.53                                  | 0.84                                  |
| <i>Cep290</i>        | 0.98        | 4.64        | 0.95          | 5.39          | 1.03                                  | 0.86                                  |
| <i>Ssx2ip</i>        | 0.98        | 4.37        | 0.59          | 4.47          | 1.66                                  | 0.98                                  |
| <i>E2f2</i>          | 1.21        | 4.26        | 0.89          | 3.97          | 1.36                                  | 1.07                                  |
| <i>Emilin2</i>       | 0.98        | 4.86        | 0.58          | 13.11         | 1.69                                  | 0.37                                  |
| <i>Whrn</i>          | 7.43        | 4.51        | 7.61          | 7.25          | 0.98                                  | 0.62                                  |
| <i>Sgk3</i>          | 0.98        | 1.50        | 0.77          | 1.57          | 1.28                                  | 0.96                                  |
| <i>E2f7</i>          | 1.22        | 7.97        | 0.87          | 8.13          | 1.40                                  | 0.98                                  |
| <i>2810417H13Rik</i> | 1.18        | 4.10        | 0.88          | 3.38          | 1.35                                  | 1.21                                  |
| <i>Bard1</i>         | 0.94        | 4.09        | 0.49          | 4.67          | 1.92                                  | 0.88                                  |
| <i>Masl1</i>         | 0.68        | 5.03        | 0.65          | 4.02          | 1.05                                  | 1.25                                  |
| <i>St3gal5</i>       | 1.20        | 4.55        | 0.60          | 4.73          | 2.00                                  | 0.96                                  |
| <i>Bcl2l1</i>        | 1.42        | 4.13        | 0.68          | 5.30          | 2.09                                  | 0.78                                  |
| <i>Metap2</i>        | 0.95        | 3.91        | 0.89          | 2.91          | 1.07                                  | 1.34                                  |
| <i>Ccrn4l</i>        | 0.88        | 3.94        | 0.38          | 2.44          | 2.32                                  | 1.61                                  |
| <i>Cpeb3</i>         | 1.08        | 4.16        | 0.70          | 8.74          | 1.54                                  | 0.48                                  |
| <i>Cd24a</i>         | 1.10        | 4.05        | 0.89          | 3.14          | 1.24                                  | 1.29                                  |
| <i>Acp1</i>          | 0.94        | 3.67        | 0.81          | 3.31          | 1.16                                  | 1.11                                  |
| <i>Dusp8</i>         | 0.88        | 7.10        | 1.00          | 9.11          | 0.88                                  | 0.78                                  |
| <i>Il1r1l</i>        | 0.81        | 4.20        | 0.69          | 4.11          | 1.17                                  | 1.02                                  |
| <i>Tmem120b*</i>     | 0.95        | 3.24        | 0.72          | 1.90          | 1.32                                  | 1.71                                  |
| <i>Svip</i>          | 0.81        | 3.81        | 0.82          | 4.42          | 0.99                                  | 0.86                                  |
| <i>Nlrp12</i>        | 0.81        | 6.53        | 0.58          | 10.45         | 1.39                                  | 0.62                                  |
| <i>Zwilch</i>        | 0.84        | 3.65        | 0.58          | 3.65          | 1.45                                  | 1.00                                  |
| <i>Pi4k2b*</i>       | 0.82        | 3.44        | 0.68          | 1.80          | 1.21                                  | 1.91                                  |
| <i>Brip1</i>         | 0.86        | 3.54        | 0.64          | 5.37          | 1.34                                  | 0.66                                  |

|               |      |       |      |       |      |      |
|---------------|------|-------|------|-------|------|------|
| Ranbp10       | 0.96 | 3.57  | 0.69 | 3.49  | 1.39 | 1.02 |
| Cenpl         | 0.94 | 3.78  | 0.66 | 3.56  | 1.42 | 1.06 |
| Hagh          | 1.05 | 3.36  | 0.87 | 2.31  | 1.21 | 1.45 |
| Mad2l1        | 0.92 | 3.56  | 0.70 | 2.33  | 1.31 | 1.53 |
| Ccdc34        | 1.06 | 3.37  | 0.70 | 2.77  | 1.51 | 1.22 |
| 5730508B09Rik | 0.89 | 3.47  | 0.55 | 2.72  | 1.62 | 1.28 |
| Klra2         | 0.95 | 3.85  | 0.63 | 4.56  | 1.51 | 0.84 |
| Dek*          | 0.89 | 3.41  | 0.65 | 1.79  | 1.37 | 1.91 |
| Mxd1          | 1.00 | 3.49  | 0.72 | 2.99  | 1.39 | 1.17 |
| Eij2Ak2       | 0.96 | 3.49  | 0.76 | 5.28  | 1.27 | 0.66 |
| Plk4          | 0.86 | 3.27  | 0.67 | 1.95  | 1.28 | 1.68 |
| Gbp10         | 0.83 | 5.53  | 0.62 | 6.43  | 1.35 | 0.86 |
| Gadd45a       | 1.15 | 3.14  | 0.97 | 2.56  | 1.19 | 1.23 |
| Gcnt2         | 0.93 | 2.49  | 0.75 | 2.36  | 1.24 | 1.06 |
| Slc22a23      | 0.93 | 3.11  | 0.57 | 6.69  | 1.63 | 0.46 |
| Chtf18        | 1.13 | 3.04  | 0.79 | 2.80  | 1.43 | 1.09 |
| Cks1b         | 1.07 | 3.05  | 0.99 | 3.35  | 1.08 | 0.91 |
| Otub2         | 0.97 | 2.57  | 0.81 | 1.66  | 1.20 | 1.55 |
| Igj           | 1.05 | 3.07  | 0.92 | 2.97  | 1.14 | 1.03 |
| E2f1          | 1.03 | 2.86  | 0.93 | 3.47  | 1.11 | 0.82 |
| Mcm2          | 1.21 | 2.94  | 0.87 | 3.75  | 1.39 | 0.78 |
| Ccr12         | 1.30 | 2.86  | 0.64 | 3.33  | 2.03 | 0.86 |
| Xk            | 1.13 | 2.95  | 0.64 | 2.03  | 1.75 | 1.46 |
| Clec4a2       | 0.95 | 2.84  | 0.73 | 2.33  | 1.30 | 1.22 |
| Mtfr1         | 1.05 | 2.82  | 0.79 | 1.20  | 1.33 | 2.35 |
| Fam132B       | 1.25 | 20.22 | 1.18 | 10.21 | 1.06 | 1.98 |
| Asb1          | 0.92 | 2.93  | 0.80 | 3.27  | 1.15 | 0.90 |
| Cmas*         | 1.21 | 2.63  | 0.80 | 1.38  | 1.51 | 1.91 |
| Vcan          | 0.72 | 5.57  | 0.48 | 4.51  | 1.50 | 1.23 |
| Arhgap19      | 1.11 | 3.00  | 0.80 | 3.17  | 1.39 | 0.95 |
| Oaf           | 0.96 | 2.87  | 0.59 | 3.09  | 1.63 | 0.93 |
| Gch1          | 0.97 | 3.05  | 0.97 | 2.94  | 0.99 | 1.04 |
| Lbp           | 1.09 | 4.24  | 0.80 | 4.49  | 1.37 | 0.94 |
| Il1b          | 1.09 | 2.91  | 0.95 | 3.31  | 1.15 | 0.88 |
| Trak2         | 0.90 | 2.65  | 0.64 | 2.74  | 1.41 | 0.97 |
| Sgms2         | 0.94 | 2.64  | 0.47 | 4.04  | 2.00 | 0.65 |
| P2ry1         | 1.18 | 2.69  | 0.91 | 3.12  | 1.30 | 0.86 |
| Psmc3ip       | 1.00 | 2.40  | 0.87 | 1.80  | 1.15 | 1.33 |
| Net1          | 0.98 | 1.27  | 0.75 | 1.96  | 1.31 | 0.65 |
| Mcm5          | 1.28 | 2.50  | 0.78 | 2.43  | 1.64 | 1.03 |
| Gas2l3        | 0.74 | 2.41  | 0.37 | 3.27  | 2.00 | 0.74 |
| Scoc          | 0.93 | 2.46  | 1.13 | 2.64  | 0.82 | 0.93 |
| Arl4A         | 0.87 | 2.60  | 0.64 | 3.18  | 1.36 | 0.82 |
| Cd300lf       | 1.05 | 2.47  | 0.94 | 2.50  | 1.12 | 0.99 |
| Minpp1        | 1.05 | 2.49  | 0.62 | 2.51  | 1.69 | 0.99 |
| Fut1          | 1.26 | 9.64  | 1.00 | 8.91  | 1.26 | 1.08 |
| March5        | 0.98 | 2.08  | 0.72 | 1.55  | 1.36 | 1.34 |
| Fbxo48        | 0.83 | 2.37  | 0.96 | 2.14  | 0.87 | 1.11 |
| Piga          | 0.93 | 2.40  | 0.79 | 1.82  | 1.18 | 1.32 |
| Usp46         | 0.90 | 2.45  | 0.50 | 4.34  | 1.80 | 0.56 |
| Reep4         | 1.77 | 2.27  | 1.63 | 2.08  | 1.09 | 1.09 |
| Dck           | 1.07 | 2.32  | 0.65 | 1.65  | 1.64 | 1.41 |
| Usp32         | 0.88 | 2.27  | 0.56 | 2.76  | 1.58 | 0.82 |
| Hace1         | 0.85 | 2.30  | 0.70 | 2.06  | 1.21 | 1.12 |
| Sh2D1B1       | 1.27 | 2.41  | 0.91 | 2.61  | 1.40 | 0.93 |
| Gsr           | 0.83 | 2.21  | 0.49 | 3.12  | 1.69 | 0.71 |
| Ifih1         | 1.03 | 2.27  | 0.60 | 2.60  | 1.70 | 0.87 |
| Casp4         | 0.93 | 2.23  | 0.90 | 1.80  | 1.03 | 1.24 |
| Vopp1         | 1.11 | 2.32  | 0.95 | 5.96  | 1.17 | 0.39 |
| Cer2          | 0.94 | 2.29  | 0.76 | 2.05  | 1.24 | 1.12 |
| Gca           | 0.89 | 2.22  | 0.67 | 2.32  | 1.33 | 0.96 |
| Klhl12        | 1.15 | 2.17  | 0.82 | 2.49  | 1.40 | 0.87 |
| Rbbp8         | 0.86 | 2.27  | 0.75 | 1.45  | 1.14 | 1.57 |
| Parvb         | 1.21 | 2.08  | 0.87 | 3.40  | 1.39 | 0.61 |
| Suv39H2       | 0.71 | 1.65  | 0.78 | 1.07  | 0.91 | 1.55 |
| Atad2         | 0.94 | 2.13  | 0.63 | 2.04  | 1.48 | 1.04 |
| Apoo          | 0.88 | 1.82  | 0.68 | 1.18  | 1.29 | 1.55 |
| Tars12*       | 0.84 | 2.06  | 0.59 | 1.56  | 1.42 | 1.32 |
| Mfsd9         | 0.96 | 2.14  | 0.81 | 7.61  | 1.19 | 0.28 |
| Tnfrsf14      | 1.28 | 2.17  | 1.07 | 2.21  | 1.20 | 0.98 |
| B4gal6        | 1.11 | 2.12  | 0.78 | 3.06  | 1.42 | 0.69 |
| Ncapd3        | 0.82 | 2.07  | 0.71 | 2.12  | 1.15 | 0.98 |
| Brpf3         | 0.95 | 2.15  | 0.74 | 2.84  | 1.28 | 0.76 |
| Sass6         | 0.90 | 2.00  | 0.71 | 1.21  | 1.26 | 1.65 |
| Cdkn2d*       | 1.13 | 2.06  | 0.92 | 1.57  | 1.23 | 1.31 |
| Mxl           | 0.87 | 2.06  | 0.76 | 2.09  | 1.15 | 0.99 |
| Neu3          | 0.95 | 2.08  | 0.65 | 1.96  | 1.46 | 1.06 |
| Rhou          | 1.31 | 5.16  | 0.66 | 4.22  | 1.99 | 1.22 |
| Creg1         | 0.97 | 2.09  | 0.80 | 3.09  | 1.21 | 0.68 |
| Agfg2         | 1.16 | 1.97  | 0.70 | 2.13  | 1.65 | 0.93 |
| Xcl1          | 1.02 | 1.85  | 0.74 | 2.02  | 1.38 | 0.92 |
| Zfp367        | 0.82 | 2.04  | 0.60 | 1.58  | 1.35 | 1.29 |
| Evi5          | 0.77 | 2.08  | 0.58 | 3.78  | 1.33 | 0.55 |
| Timm8B        | 0.84 | 1.95  | 1.64 | 0.97  | 0.51 | 2.02 |
| Lrrc39        | 0.91 | 1.62  | 0.73 | 1.15  | 1.24 | 1.42 |
| Arhgap11A     | 1.00 | 1.99  | 0.82 | 1.92  | 1.22 | 1.04 |
| Apold1        | 1.11 | 2.07  | 2.00 | 1.87  | 0.55 | 1.11 |
| Rgs18         | 0.89 | 2.02  | 0.68 | 1.25  | 1.30 | 1.62 |
| Pdgfc         | 0.92 | 2.07  | 0.72 | 3.03  | 1.28 | 0.68 |
| Endod1        | 0.93 | 2.02  | 0.65 | 2.13  | 1.43 | 0.95 |
| Cox7A2        | 0.84 | 1.89  | 0.83 | 0.92  | 1.01 | 2.04 |
| Slc11A2       | 1.19 | 2.07  | 0.84 | 2.07  | 1.41 | 1.00 |
| Pls1          | 1.32 | 1.86  | 0.71 | 1.83  | 1.86 | 1.02 |
| Thbs1         | 1.51 | 1.88  | 0.41 | 2.44  | 3.68 | 0.77 |
| Slc16a3       | 1.14 | 2.20  | 0.87 | 2.48  | 1.31 | 0.89 |
| Cln8          | 0.91 | 1.95  | 0.75 | 2.11  | 1.20 | 0.93 |
| Pdk1          | 1.83 | 2.10  | 1.68 | 2.11  | 1.09 | 1.00 |
| Atp8b4        | 1.02 | 1.93  | 0.65 | 2.01  | 1.57 | 0.96 |
| Mthfd2        | 1.22 | 1.91  | 1.03 | 1.56  | 1.18 | 1.22 |
| Deb1*         | 0.78 | 1.65  | 1.08 | 1.11  | 0.72 | 1.49 |
| Tab3          | 0.92 | 1.92  | 0.61 | 2.14  | 1.52 | 0.90 |
| Pla2g12a      | 0.85 | 1.82  | 0.49 | 1.01  | 1.73 | 1.80 |
| Kamal1        | 0.92 | 1.89  | 0.74 | 2.00  | 1.24 | 0.94 |
| Ugt1A7C       | 0.92 | 2.37  | 0.60 | 4.42  | 1.54 | 0.54 |
| Psmc3         | 1.17 | 1.89  | 0.87 | 1.93  | 1.34 | 0.98 |
| Socs3         | 0.99 | 1.92  | 0.64 | 1.47  | 1.55 | 1.31 |
| Itsn1         | 0.96 | 1.68  | 0.58 | 2.50  | 1.66 | 0.67 |

|                      |      |       |      |       |      |      |
|----------------------|------|-------|------|-------|------|------|
| <i>Stat1</i>         | 1.12 | 1.76  | 0.88 | 2.30  | 1.28 | 0.77 |
| <i>Ppp2R5B</i>       | 0.97 | 1.82  | 0.92 | 1.71  | 1.06 | 1.06 |
| <i>Nudt12</i>        | 0.79 | 1.92  | 0.62 | 2.21  | 1.27 | 0.87 |
| <i>Cycs</i>          | 0.90 | 1.86  | 1.04 | 1.02  | 0.86 | 1.83 |
| <i>Adpgk</i>         | 0.98 | 1.89  | 0.79 | 2.16  | 1.24 | 0.88 |
| <i>Pfdn4</i>         | 0.92 | 1.79  | 0.95 | 0.86  | 0.96 | 2.07 |
| <i>Nlrc5</i>         | 0.88 | 1.94  | 0.77 | 2.32  | 1.15 | 0.84 |
| <i>Pilra</i>         | 0.94 | 1.88  | 0.73 | 2.40  | 1.29 | 0.78 |
| <i>Ehbp1L1</i>       | 1.09 | 1.80  | 0.81 | 2.18  | 1.35 | 0.83 |
| <i>Plscr1</i>        | 0.90 | 1.83  | 0.66 | 1.79  | 1.36 | 1.02 |
| <i>Atg4D</i>         | 1.04 | 1.44  | 0.81 | 1.32  | 1.29 | 1.09 |
| <i>Setd8</i>         | 0.99 | 1.83  | 0.68 | 2.19  | 1.46 | 0.84 |
| <i>C1GalT1C1</i>     | 0.86 | 1.86  | 0.91 | 0.90  | 0.94 | 2.06 |
| <i>Spon1</i>         | 1.23 | 1.85  | 0.93 | 3.31  | 1.32 | 0.56 |
| <i>Rasgrp4</i>       | 1.11 | 1.63  | 0.91 | 1.98  | 1.22 | 0.82 |
| <i>Hs6S11</i>        | 1.20 | 1.82  | 0.65 | 1.95  | 1.83 | 0.93 |
| <i>Z700097O09Rik</i> | 0.91 | 1.84  | 0.76 | 1.16  | 1.20 | 1.59 |
| <i>Fosl2</i>         | 1.23 | 1.90  | 0.85 | 1.96  | 1.45 | 0.97 |
| <i>Gpr88</i>         | 2.01 | 1.76  | 1.00 | 1.41  | 2.01 | 1.25 |
| <i>Kcnj2*</i>        | 0.93 | 1.82  | 0.55 | 1.08  | 1.69 | 1.69 |
| <i>Kctd7</i>         | 1.08 | 1.75  | 0.50 | 1.74  | 2.16 | 1.01 |
| <i>Galnt3</i>        | 1.02 | 1.75  | 0.65 | 2.22  | 1.57 | 0.79 |
| <i>Mafg</i>          | 0.92 | 1.76  | 0.82 | 1.66  | 1.13 | 1.07 |
| <i>Cbx5</i>          | 0.91 | 1.94  | 0.51 | 1.83  | 1.80 | 1.06 |
| <i>Mrpl20</i>        | 0.78 | 1.68  | 0.89 | 1.02  | 0.88 | 1.65 |
| <i>Mrpl33</i>        | 0.92 | 1.85  | 0.85 | 1.19  | 1.09 | 1.56 |
| <i>Znhit3</i>        | 0.70 | 1.57  | 0.93 | 0.93  | 0.75 | 1.69 |
| <i>Olfrl1033</i>     | 2.70 | 10.34 | 7.01 | 19.65 | 0.38 | 0.53 |
| <i>Map4K5</i>        | 0.88 | 1.63  | 0.58 | 1.44  | 1.52 | 1.14 |
| <i>Rnf11</i>         | 1.04 | 1.73  | 0.55 | 1.99  | 1.88 | 0.87 |
| <i>Yod1</i>          | 0.76 | 1.73  | 0.55 | 1.29  | 1.38 | 1.34 |
| <i>Mospd1</i>        | 0.88 | 1.65  | 0.67 | 1.52  | 1.31 | 1.09 |
| <i>Mri1</i>          | 1.84 | 1.77  | 3.06 | 5.27  | 0.60 | 0.34 |
| <i>Ndufs4</i>        | 0.88 | 1.83  | 0.71 | 0.86  | 1.24 | 2.12 |
| <i>Tmem106A</i>      | 1.11 | 1.72  | 0.87 | 2.14  | 1.27 | 0.80 |
| <i>Ier3*</i>         | 1.03 | 1.59  | 1.50 | 2.00  | 0.69 | 0.80 |
| <i>Acer3</i>         | 0.77 | 1.71  | 0.54 | 1.85  | 1.43 | 0.93 |
| <i>Tmem194</i>       | 1.05 | 1.73  | 0.50 | 1.39  | 2.11 | 1.25 |
| <i>Rpgrip1L</i>      | 1.10 | 1.70  | 0.93 | 1.98  | 1.18 | 0.86 |
| <i>I600002H07Rik</i> | 0.97 | 1.65  | 0.77 | 1.79  | 1.26 | 0.92 |
| <i>Tbc1D24</i>       | 0.68 | 1.63  | 0.65 | 1.70  | 1.05 | 0.96 |
| <i>Bcor1l</i>        | 1.29 | 1.66  | 0.56 | 1.77  | 2.33 | 0.94 |
| <i>Prdx3</i>         | 1.03 | 1.65  | 0.79 | 1.14  | 1.29 | 1.45 |
| <i>Pot1B</i>         | 1.00 | 1.97  | 1.03 | 3.25  | 0.98 | 0.61 |
| <i>Rnf149</i>        | 0.95 | 1.64  | 0.66 | 1.62  | 1.44 | 1.01 |
| <i>Ahi1</i>          | 1.06 | 1.56  | 0.73 | 1.50  | 1.46 | 1.04 |
| <i>Nhs12*</i>        | 0.97 | 1.69  | 1.06 | 0.95  | 0.92 | 1.78 |
| <i>Relt</i>          | 1.01 | 1.65  | 0.85 | 1.78  | 1.18 | 0.93 |
| <i>Nlrp3</i>         | 1.12 | 1.65  | 0.73 | 1.76  | 1.53 | 0.94 |
| <i>Stx11</i>         | 1.06 | 1.72  | 0.66 | 1.79  | 1.60 | 0.96 |
| <i>Magohb</i>        | 1.03 | 1.44  | 0.73 | 1.16  | 1.41 | 1.24 |
| <i>Ncr1</i>          | 1.04 | 1.67  | 1.29 | 2.62  | 0.80 | 0.64 |
| <i>Mier3</i>         | 0.97 | 1.62  | 0.62 | 1.36  | 1.57 | 1.20 |
| <i>Cish</i>          | 1.18 | 1.61  | 0.82 | 1.42  | 1.44 | 1.13 |
| <i>Yipf4</i>         | 1.10 | 1.59  | 0.78 | 1.32  | 1.41 | 1.20 |
| <i>Slc25A17</i>      | 1.22 | 1.46  | 1.20 | 1.53  | 1.01 | 0.95 |
| <i>Ulk1</i>          | 0.96 | 1.54  | 0.76 | 1.78  | 1.27 | 0.87 |
| <i>Picalm</i>        | 0.92 | 1.67  | 0.66 | 1.73  | 1.39 | 0.97 |
| <i>Eif4A1</i>        | 0.92 | 1.27  | 0.89 | 0.99  | 1.03 | 1.28 |
| <i>Nudt5</i>         | 0.89 | 1.48  | 0.80 | 1.12  | 1.11 | 1.31 |
| <i>Cops2</i>         | 0.83 | 1.56  | 0.75 | 1.00  | 1.12 | 1.56 |
| <i>Sept3</i>         | 0.63 | 1.66  | 0.57 | 2.24  | 1.10 | 0.74 |
| <i>Celsr1</i>        | 1.19 | 1.65  | 1.16 | 3.01  | 1.03 | 0.55 |
| <i>Eef1E1</i>        | 1.03 | 1.55  | 0.73 | 1.07  | 1.41 | 1.46 |
| <i>Gm8369</i>        | 1.40 | 1.52  | 1.10 | 1.74  | 1.28 | 0.88 |
| <i>Agap1</i>         | 0.96 | 1.60  | 0.74 | 2.41  | 1.29 | 0.66 |
| <i>Asap3</i>         | 1.56 | 1.47  | 0.69 | 1.35  | 2.26 | 1.09 |
| <i>Neto2</i>         | 0.67 | 1.57  | 0.76 | 2.11  | 0.88 | 0.74 |
| <i>Arl6Ip6</i>       | 0.99 | 1.58  | 0.92 | 1.83  | 1.08 | 0.86 |
| <i>Plod2</i>         | 0.98 | 1.49  | 0.72 | 1.25  | 1.37 | 1.19 |
| <i>Slfn5</i>         | 1.03 | 1.56  | 0.73 | 2.47  | 1.41 | 0.63 |
| <i>Usp1</i>          | 0.92 | 1.56  | 0.75 | 1.21  | 1.22 | 1.29 |
| <i>Med30</i>         | 1.01 | 1.43  | 0.65 | 0.68  | 1.56 | 2.10 |
| <i>Klf11</i>         | 1.11 | 1.58  | 0.69 | 2.48  | 1.60 | 0.64 |
| <i>Illa</i>          | 0.84 | 1.51  | 0.81 | 1.37  | 1.05 | 1.10 |
| <i>Fundc2</i>        | 0.91 | 1.61  | 0.77 | 1.33  | 1.18 | 1.21 |
| <i>Cbwd1</i>         | 0.99 | 1.63  | 0.85 | 1.42  | 1.17 | 1.15 |
| <i>Rbm47</i>         | 1.11 | 1.55  | 0.73 | 1.92  | 1.51 | 0.81 |
| <i>Tmx4</i>          | 0.90 | 1.53  | 0.65 | 2.22  | 1.38 | 0.69 |
| <i>Palb2</i>         | 0.93 | 1.62  | 0.73 | 1.69  | 1.27 | 0.96 |
| <i>Tmtc4</i>         | 1.40 | 1.53  | 0.91 | 1.49  | 1.55 | 1.03 |
| <i>Mrpl41</i>        | 0.91 | 1.52  | 0.98 | 0.92  | 0.92 | 1.66 |
| <i>Gdpd1</i>         | 1.06 | 1.49  | 0.80 | 2.16  | 1.33 | 0.69 |
| <i>Tbx21</i>         | 1.70 | 1.60  | 0.81 | 2.16  | 2.10 | 0.74 |
| <i>Glipr2</i>        | 0.99 | 1.56  | 0.88 | 1.57  | 1.13 | 0.99 |
| <i>Uchl5</i>         | 1.05 | 1.46  | 0.78 | 1.11  | 1.35 | 1.31 |
| <i>Ghitm</i>         | 1.06 | 1.82  | 0.58 | 0.93  | 1.82 | 1.96 |
| <i>Eil2</i>          | 1.03 | 1.51  | 0.69 | 1.82  | 1.50 | 0.83 |
| <i>Slc30A9</i>       | 0.86 | 1.53  | 0.77 | 1.78  | 1.11 | 0.86 |
| <i>H2-T24</i>        | 0.93 | 1.53  | 0.75 | 1.38  | 1.24 | 1.11 |
| <i>Cisb</i>          | 1.25 | 1.49  | 0.81 | 2.01  | 1.55 | 0.74 |
| <i>Dgkg</i>          | 1.00 | 2.53  | 0.61 | 2.81  | 1.63 | 0.90 |
| <i>Tmem215</i>       | 1.61 | 1.56  | 1.08 | 3.50  | 1.48 | 0.44 |
| <i>Tinagl1</i>       | 1.30 | 1.45  | 0.92 | 2.15  | 1.41 | 0.67 |
| <i>Dnajc6</i>        | 0.64 | 1.12  | 0.45 | 1.42  | 1.43 | 0.79 |
| <i>Dgat2</i>         | 0.64 | 1.49  | 0.57 | 1.77  | 1.12 | 0.84 |
| <i>Cpd</i>           | 0.85 | 1.48  | 0.55 | 2.27  | 1.55 | 0.65 |
| <i>Ran</i>           | 1.18 | 1.46  | 1.02 | 1.39  | 1.16 | 1.05 |
| <i>Tcf7L2</i>        | 1.02 | 1.43  | 0.58 | 1.90  | 1.75 | 0.75 |
| <i>Xkr5</i>          | 0.76 | 3.31  | 0.38 | 3.66  | 1.98 | 0.90 |
| <i>Daam1</i>         | 0.89 | 1.48  | 0.56 | 1.62  | 1.59 | 0.91 |
| <i>Cd300A</i>        | 1.07 | 1.47  | 0.78 | 1.72  | 1.38 | 0.85 |
| <i>Snrpb2</i>        | 0.89 | 1.44  | 0.84 | 0.84  | 1.06 | 1.71 |
| <i>Dmxl2</i>         | 0.73 | 1.47  | 0.61 | 1.87  | 1.20 | 0.79 |
| <i>Stk3</i>          | 0.88 | 1.53  | 0.70 | 1.89  | 1.26 | 0.81 |
| <i>Slc22A15</i>      | 0.79 | 1.42  | 0.65 | 2.20  | 1.22 | 0.65 |
| <i>Zfand6</i>        | 0.97 | 1.41  | 0.77 | 1.05  | 1.25 | 1.35 |

|                      |      |      |      |       |      |      |
|----------------------|------|------|------|-------|------|------|
| <i>Timm17A</i>       | 1.08 | 1.62 | 0.77 | 1.10  | 1.40 | 1.48 |
| <i>Cox11</i>         | 0.88 | 1.48 | 0.68 | 1.36  | 1.29 | 1.09 |
| <i>Usp14</i>         | 0.98 | 1.44 | 0.74 | 1.29  | 1.32 | 1.12 |
| <i>Myo19</i>         | 0.90 | 1.43 | 0.78 | 1.36  | 1.15 | 1.05 |
| <i>Immp1L</i>        | 0.88 | 1.39 | 0.72 | 0.92  | 1.23 | 1.51 |
| <i>Usp25</i>         | 1.08 | 1.45 | 0.73 | 1.95  | 1.48 | 0.74 |
| <i>Mpl</i>           | 1.83 | 1.62 | 0.90 | 2.51  | 2.03 | 0.64 |
| <i>Arhgef12</i>      | 0.92 | 1.44 | 0.60 | 2.15  | 1.54 | 0.67 |
| <i>Il12B</i>         | 0.58 | 1.43 | 0.41 | 0.84  | 1.42 | 1.72 |
| <i>Kif1A</i>         | 1.66 | 2.03 | 0.84 | 3.24  | 1.97 | 0.63 |
| <i>Mrpl51</i>        | 1.10 | 1.51 | 1.05 | 1.47  | 1.04 | 1.03 |
| <i>Tmc3</i>          | 0.74 | 1.43 | 0.50 | 0.96  | 1.50 | 1.48 |
| <i>Vbp1</i>          | 0.97 | 1.43 | 0.64 | 0.91  | 1.50 | 1.57 |
| <i>Chac1</i>         | 1.30 | 8.79 | 1.00 | 7.75  | 1.30 | 1.13 |
| <i>Mybl1</i>         | 0.67 | 1.55 | 0.57 | 1.46  | 1.17 | 1.06 |
| <i>Itga5</i>         | 0.94 | 1.42 | 0.50 | 2.01  | 1.90 | 0.71 |
| <i>Trim37</i>        | 0.98 | 1.51 | 0.83 | 0.71  | 1.18 | 2.13 |
| <i>Ubiad1</i>        | 1.82 | 1.45 | 0.93 | 1.47  | 1.96 | 0.99 |
| <i>Srm</i>           | 1.24 | 1.40 | 0.71 | 1.14  | 1.74 | 1.23 |
| <i>Aa986860</i>      | 1.02 | 3.08 | 0.67 | 3.66  | 1.52 | 0.84 |
| <i>Ccdc62</i>        | 1.11 | 1.57 | 0.90 | 1.38  | 1.23 | 1.14 |
| <i>Gm13154</i>       | 5.24 | 8.74 | 5.71 | 7.63  | 0.92 | 1.15 |
| <i>Tuft1</i>         | 1.02 | 1.39 | 0.72 | 1.50  | 1.42 | 0.93 |
| <i>Eif5</i>          | 0.92 | 1.47 | 0.79 | 1.29  | 1.16 | 1.14 |
| <i>Ppp1r3b</i>       | 1.11 | 1.45 | 1.05 | 1.75  | 1.06 | 0.83 |
| <i>Ncoa7</i>         | 0.83 | 1.57 | 0.69 | 1.63  | 1.19 | 0.96 |
| <i>Gas2</i>          | 0.91 | 1.35 | 0.52 | 1.05  | 1.75 | 1.29 |
| <i>Eif2S1</i>        | 0.87 | 1.42 | 0.73 | 0.92  | 1.20 | 1.55 |
| <i>Dcaf12</i>        | 1.22 | 1.40 | 0.77 | 1.21  | 1.58 | 1.16 |
| <i>Fgl2</i>          | 0.83 | 1.44 | 0.70 | 2.85  | 1.17 | 0.50 |
| <i>Sort1</i>         | 0.97 | 1.38 | 0.74 | 1.35  | 1.31 | 1.02 |
| <i>Neur11A</i>       | 1.99 | 2.85 | 1.56 | 4.94  | 1.27 | 0.58 |
| <i>Stxbp4</i>        | 1.13 | 1.41 | 0.71 | 1.63  | 1.60 | 0.87 |
| <i>Pkn2</i>          | 0.88 | 1.37 | 0.63 | 1.42  | 1.40 | 0.96 |
| <i>Armc9</i>         | 1.09 | 1.31 | 0.97 | 0.73  | 1.13 | 1.79 |
| <i>Vcam1</i>         | 0.79 | 1.40 | 0.61 | 1.59  | 1.30 | 0.88 |
| <i>Rnf139</i>        | 0.91 | 1.43 | 0.60 | 1.42  | 1.51 | 1.01 |
| <i>Nup35</i>         | 0.74 | 1.36 | 0.69 | 1.41  | 1.08 | 0.97 |
| <i>Fbxo42</i>        | 1.08 | 1.37 | 0.57 | 1.42  | 1.88 | 0.97 |
| <i>Gtf2A2</i>        | 0.98 | 1.21 | 0.81 | 0.98  | 1.22 | 1.23 |
| <i>Tubb3</i>         | 0.45 | 5.01 | 1.09 | 5.17  | 0.42 | 0.97 |
| <i>Coro2B</i>        | 1.34 | 1.44 | 3.25 | 18.87 | 0.41 | 0.08 |
| <i>Gatm</i>          | 0.92 | 1.36 | 0.60 | 1.48  | 1.53 | 0.92 |
| <i>Cox17</i>         | 1.12 | 1.27 | 0.94 | 0.86  | 1.19 | 1.48 |
| <i>Snrnp27</i>       | 0.89 | 1.39 | 0.84 | 1.02  | 1.07 | 1.37 |
| <i>Rad21</i>         | 1.15 | 1.36 | 0.75 | 1.49  | 1.52 | 0.91 |
| <i>Synj1</i>         | 0.90 | 1.32 | 0.57 | 1.62  | 1.57 | 0.82 |
| <i>Nudcd1</i>        | 0.88 | 1.42 | 0.66 | 1.10  | 1.33 | 1.30 |
| <i>Cbx3</i>          | 1.00 | 1.37 | 0.74 | 1.12  | 1.36 | 1.22 |
| <i>Cdca4</i>         | 1.02 | 1.43 | 0.76 | 1.19  | 1.34 | 1.20 |
| <i>Il15ra</i>        | 0.74 | 1.39 | 0.65 | 1.48  | 1.14 | 0.94 |
| <i>Mfap3L</i>        | 0.82 | 1.38 | 0.92 | 1.19  | 0.89 | 1.16 |
| <i>Zmynd19</i>       | 1.01 | 1.39 | 0.72 | 1.30  | 1.40 | 1.08 |
| <i>Samd3</i>         | 1.08 | 1.49 | 0.78 | 1.70  | 1.38 | 0.88 |
| <i>Myef2</i>         | 0.88 | 1.32 | 0.70 | 1.13  | 1.25 | 1.16 |
| <i>Trpc6</i>         | 0.90 | 1.66 | 1.03 | 1.54  | 0.87 | 1.08 |
| <i>SIPr5</i>         | 1.05 | 1.54 | 0.67 | 1.82  | 1.56 | 0.85 |
| <i>Cdk2</i>          | 1.10 | 1.31 | 0.89 | 1.18  | 1.23 | 1.11 |
| <i>Wdr26</i>         | 0.89 | 1.37 | 0.71 | 1.43  | 1.26 | 0.95 |
| <i>Atp6V0E</i>       | 0.98 | 1.38 | 0.76 | 0.94  | 1.30 | 1.47 |
| <i>Mrps14</i>        | 1.01 | 1.32 | 0.46 | 0.15  | 2.18 | 8.93 |
| <i>Riok3</i>         | 1.02 | 1.39 | 0.75 | 1.26  | 1.36 | 1.11 |
| <i>Ctmbp2</i>        | 1.07 | 1.41 | 0.89 | 2.38  | 1.21 | 0.59 |
| <i>Sh3Glb1</i>       | 1.04 | 1.37 | 0.70 | 1.05  | 1.50 | 1.30 |
| <i>6030458C11Rik</i> | 0.88 | 1.28 | 0.73 | 1.47  | 1.21 | 0.87 |
| <i>Dmwd</i>          | 1.06 | 1.34 | 0.83 | 1.28  | 1.28 | 1.05 |
| <i>Rnd1</i>          | 0.81 | 1.75 | 0.85 | 2.20  | 0.95 | 0.80 |
| <i>Arl5A</i>         | 1.42 | 1.41 | 1.21 | 1.76  | 1.18 | 0.80 |
| <i>Fgr</i>           | 1.11 | 1.35 | 0.60 | 1.47  | 1.87 | 0.92 |
| <i>Ap1S2</i>         | 0.88 | 1.33 | 0.58 | 1.23  | 1.50 | 1.08 |
| <i>Plau</i>          | 1.11 | 1.37 | 0.69 | 2.10  | 1.60 | 0.65 |
| <i>Hspbap1</i>       | 0.96 | 1.27 | 0.72 | 1.88  | 1.33 | 0.68 |

**Supplemental Table 5: Cell subtype enrichment in DKO and TKO spleens by the DCQ method.**

Shown are the cell subtypes that were significantly enriched or depleted in the TKO or DKO spleens relative to their WT counterparts, as determined by the DCQ method (1). Cell type abbreviations are as in (1). The p values of the comparisons are shown, along with the average enrichment, cell type specified, and original tissue source of the specified cell type, along with the antibodies that identify that cell type. See the text for further details.

| Subtypes in TKO          | P value | Direction | Average enrichment score | Cell types            | Tissue source                    | Ab reactivity                                                 |
|--------------------------|---------|-----------|--------------------------|-----------------------|----------------------------------|---------------------------------------------------------------|
| GN.URAC.PC               | 0       | up        | 0.05                     | Granulocyte           | Peritoneal Cavity (PC)           | CD11b+ Ly6-G+                                                 |
| MF.II+480LO.PC           | 0       | up        | 0.05                     | Macrophage            | Peritoneal Cavity (PC)           | B220- F4/80lo CD115hi MHCII+                                  |
| GN.BL                    | 0       | up        | 0.04                     | Granulocyte           | Blood (BL)                       | CD11b+ Ly6-G+                                                 |
| GN.THIO.PC               | 0.02    | up        | 0.03                     | Granulocyte           | Peritoneal Cavity (PC)           | CD11b+ Ly6-G+                                                 |
| GN.BM                    | 0.02    | up        | 0.03                     | Granulocyte           | Bone marrow (BM)                 | CD11b+ Ly6-G+ 7/4hi                                           |
| GN.ARTH.SYNF             | 0.03    | up        | 0.03                     | Granulocyte           | Bone marrow (BM)                 | CD11b+ Ly6-G+                                                 |
| DC.103+11B+.SI           | 0.03    | up        | 0.03                     | Dendritic cell        | Small intestine (SI)             | PI- CD45+ MHCII+ CD11chi CD103+ CD11b+                        |
| GN.ARTH.BM               | 0.04    | up        | 0.03                     | Granulocyte           | Bone marrow (BM)                 | CD11b+ Ly6-G+                                                 |
| SC.MEP.BM                | 0.01    | up        | 0.02                     | Stem cell             | Bone marrow (BM)                 | Lin- IL7R- Sca1- ckit+ FcgRloCD34-                            |
| NK.H+.MCMV7.SP           | 0.04    | up        | 0.02                     | NK cell               | Spleen (Sp)                      | CD3- NK1.1+ Ly49H+                                            |
| MO.6C+II-.BM             | 0.04    | up        | 0.02                     | Monocyte              | Bone marrow (BM)                 | B220- CD3- CD115+ Ly-6C+ MHCII-                               |
| T.4SP24-.TH              | 0.03    | down      | -0.01                    | $\alpha\beta$ T cell  | Thymus (Th)                      | CD4+ CD8- TCRhi CD24-/lo                                      |
| T.4MEM.LN                | 0.03    | down      | -0.01                    | $\alpha\beta$ T cell  | Subcutaneous LN (SLN)            | CD4+ CD8- TCR+ CD25- CD44hi CD122lo                           |
| T.DPSM.TH                | 0       | down      | -0.02                    | $\alpha\beta$ T cell  | Thymus (Th)                      | CD4+ CD8+ TCR-/lo FSClo                                       |
| T.4SP69+.TH              | 0       | down      | -0.02                    | $\alpha\beta$ T cell  | Thymus (Th)                      | CD4+ CD8- TCRhi CD69+                                         |
| T.4SP24INT.TH            | 0       | down      | -0.02                    | $\alpha\beta$ T cell  | Thymus (Th)                      | CD4- CD8+ TCRhi CD24int                                       |
| T.4NVE.MLN               | 0.01    | down      | -0.02                    | $\alpha\beta$ T cell  | Mesenteric LN (MLN)              | CD4+ CD8- TCR+ CD25- CD62Lhi CD44lo                           |
| B.FRE.BM                 | 0.02    | down      | -0.02                    | B cell                | Bone marrow (BM)                 | AA4+ IgM+ CD19+ HSA+                                          |
| T.DP.TH                  | 0.02    | down      | -0.02                    | $\alpha\beta$ T cell  | Thymus (Th)                      | CD4+ CD8+ TCR-/lo CD69-                                       |
| T.DP69+.TH               | 0       | down      | -0.03                    | $\alpha\beta$ T cell  | Thymus (Th)                      | CD4+ CD8+ TCRlo/int CD69+                                     |
| DC.IIHLANG-103-11BLO.SLN | 0       | down      | -0.03                    | Dendritic cell        | Skin draining lymph nodes (SDLN) | CD11c+ MHCIIhi langerin- CD103- CD11b                         |
| T.4NVE.PP                | 0.02    | down      | -0.03                    | $\alpha\beta$ T cell  | Peyer's patches (PP)             | CD4+ CD8- TCR+ CD25- CD62Lhi CD44lo                           |
| T.4+8INT.TH              | 0       | down      | -0.04                    | $\alpha\beta$ T cell  | Thymus (Th)                      | CD4+ CD8int TCRhi CD69                                        |
| T.8NVE.PP                | 0       | down      | -0.04                    | $\alpha\beta$ T cell  | Peyer's patches (PP)             | CD4- CD8+ TCR+ CD25- CD62Lhi CD44lo                           |
|                          |         |           |                          |                       |                                  |                                                               |
|                          |         |           |                          |                       |                                  |                                                               |
| Subtypes in DKO          | P value | Direction | Average enrichment score | Cell types            | Tissue source                    | Ab reactivity                                                 |
| MO.6C-II-.BM             | 0       | up        | 0.05                     | Monocyte              | Bone marrow (BM)                 | B220- CD3- CD115+ Ly-6C- MHCII- CD43+                         |
| EP.MECHL.TH              | 0       | up        | 0.04                     | Stromal               | Thymus (Th)                      | CD45- EpCAM+ Ly51- MHCIIhi                                    |
| TGD.SP                   | 0.02    | down      | -0.02                    | $\gamma\delta$ T cell | Spleen (Sp)                      | TCRd+ CD3E+ CD4- CD8-                                         |
| MF.MEDL.SLN              | 0.03    | down      | -0.02                    | Macrophage            | Skin draining lymph nodes (SDLN) | CD11b+ B220- CD90- SiglecF- CD103- Ly6G- CD169+ CD11c+ F4/80+ |
| DC.8+.TH                 | 0.03    | down      | -0.02                    | Dendritic cell        | Thymus (Th)                      | MHCII+ CD11c+ CD8a+ CD4- CD11b-                               |

1. Altboum Z, *et al.* (2014) Digital cell quantification identifies global immune cell dynamics during influenza infection. *Molecular systems biology* 10:720.
